# Supplementary material for: Viral-mediated Oct4 overexpression and inhibition of Notch signaling synergistically induce neurogenic competence in mammalian Müller glia
Source: bioRxiv preprint, doi:10.1101/2024.09.18.613666, version 3 (2025-03-28)
Supplement: Table ST2 [file 613666_file13.xls]

## Sheet: DEGs_Neurogenesis_trajectory
Genes	Show Heapmap	T.0_1	T.1_2	T.2_3	T.3_4	T.4_5	T.5_6	T.6_7	T.7_8	T.8_9	T.9_10	T.10_11	T.11_12	T.12_13	T.13_14	T.14_15	T.15_16	T.16_17	T.17_18	T.18_19	T.19_20	T.20_21	T.21_22	T.22_23	T.23_24	T.24_25	T.25_26	T.26_27	T.27_28	T.28_29	T.29_30	T.30_31	T.31_32	T.32_33	T.33_34	T.34_35	T.35_36	T.36_37	T.37_38	T.38_39	T.39_40	T.40_41	T.41_42	T.42_43	T.43_44	T.44_45	T.45_46	T.46_47	T.47_48
chr7:Nav2	Y	1.5	1.5	1.5	1.5	1.5	1.5	1.5	1.5	1.5	1.5	1.5	1.49705	1.44642	1.36282	1.2998	1.16218	0.926152	0.689411	0.543332	0.33869	0.247214	-0.000937072	-0.11723	-0.333975	-0.519379	-0.609226	-0.566705	-0.53438	-0.432069	-0.324648	-0.249521	-0.214209	-0.0424378	0.107109	0.258705	0.410098	0.563447	0.549576	0.656289	0.717924	0.818406	0.856245	0.91259	0.846197	0.823137	0.761124	0.565824	0.444583
chr5:Cux1	Y	1.5	1.5	1.5	1.5	1.5	1.5	1.5	1.5	1.4781	1.47035	1.38736	1.21084	1.11856	1.00543	1.06761	0.953419	0.880713	0.776711	0.785304	0.749065	0.621849	0.56532	0.496889	0.461305	0.409188	0.283801	0.338017	0.196029	0.312241	0.289365	0.257794	0.252067	0.403376	0.562907	0.598476	0.730842	0.749933	0.751306	0.87172	0.790835	0.729714	0.65887	0.817555	0.706717	0.647282	0.56683	0.487877	0.564638
chr1:Nckap5		1.5	1.5	1.5	1.5	1.5	1.5	1.5	1.5	1.46221	1.48901	1.5	1.47233	1.45292	1.42205	1.4158	1.3253	1.18715	1.0275	0.884534	0.805177	0.628746	0.449051	0.339785	0.246911	0.157546	0.06467	0.0761545	0.105313	0.184148	0.214591	0.242084	0.320874	0.441042	0.480098	0.557818	0.617074	0.659753	0.7361	0.719936	0.688515	0.727658	0.738708	0.77711	0.773271	0.818377	0.858487	0.824955	0.798904
chr19:Prkg1		1.5	1.5	1.5	1.5	1.5	1.5	1.5	1.5	1.5	1.5	1.5	1.28055	1.24695	1.1414	1.03214	0.918468	0.909272	0.784579	0.599322	0.398173	0.142133	-0.0510339	-0.210643	-0.311362	-0.457594	-0.479589	-0.47293	-0.501185	-0.491939	-0.498052	-0.500753	-0.445965	-0.253805	-0.293381	-0.353199	-0.350082	-0.401543	-0.420046	-0.466052	-0.387594	-0.393072	-0.455705	-0.391809	-0.372999	-0.259723	-0.177466	-0.0330327	-0.00727527
chr9:Kirrel3		1.5	1.5	1.5	1.5	1.5	1.5	1.5	1.5	1.45883	1.4953	1.5	1.5	1.42523	1.35436	1.28634	1.16049	1.04146	0.950575	0.842093	0.747059	0.532893	0.275686	0.148464	0.116686	0.0688077	-0.0508392	-0.0642778	-0.0758844	-0.0123242	0.0184114	0.147146	0.355776	0.546861	0.609458	0.571908	0.640579	0.834299	0.920254	0.954024	0.976316	0.983952	0.982971	0.94505	1.00128	0.967499	0.966595	0.878567	0.766104
chr15:Ctnnd2		1.5	1.5	1.5	1.5	1.5	1.5	1.5	1.5	1.5	1.5	1.45205	1.48121	1.42842	1.35166	1.26272	1.22523	1.09423	1.05619	0.995274	0.869685	0.807575	0.634421	0.517638	0.477334	0.45438	0.369624	0.281234	0.247848	0.25489	0.240569	0.247734	0.255439	0.371085	0.412563	0.486989	0.467402	0.515111	0.641885	0.646554	0.644803	0.709764	0.773165	0.775153	0.713253	0.711509	0.669888	0.726415	0.69725
chr6:Pde1c		1.5	1.5	1.5	1.5	1.5	1.5	1.5	1.5	1.5	1.5	1.5	1.5	1.5	1.49115	1.5	1.37134	1.20017	1.00593	0.8805	0.575396	0.38049	0.212114	0.0729333	-0.128688	-0.208057	-0.301039	-0.272607	-0.276581	-0.329011	-0.441478	-0.372608	-0.567915	-0.521509	-0.505933	-0.329614	-0.304862	-0.290274	-0.412446	-0.473649	-0.414098	-0.376059	-0.503294	-0.437042	-0.37875	-0.222661	-0.380074	-0.440803	-0.442686
chr6:Setd5		1.5	1.5	1.5	1.5	1.5	1.5	1.5	1.5	1.38813	1.28403	1.12383	1.25421	1.32712	1.18697	1.02431	0.920599	0.930597	0.909053	0.966598	0.834266	0.793413	0.817297	0.590552	0.488245	0.50175	0.574548	0.593276	0.631265	0.702407	0.698103	0.684606	0.703321	0.756362	0.800191	0.909226	0.794597	0.77972	0.806205	0.690849	0.59603	0.587415	0.707398	0.677749	0.669917	0.580636	0.379986	0.460505	0.33534
chr6:Grin2b		1.5	1.5	1.5	1.5	1.5	1.5	1.5	1.5	1.5	1.5	1.5	1.5	1.5	1.5	1.46495	1.46371	1.43157	1.31499	1.22215	1.17494	1.06821	0.973396	0.837479	0.693212	0.647084	0.614723	0.532178	0.388511	0.352198	0.317955	0.252619	0.21578	0.212196	0.244854	0.249772	0.262296	0.285264	0.358424	0.413019	0.511324	0.492602	0.531031	0.536739	0.521354	0.542454	0.573116	0.547386	0.476639
chr4:Pnisr		1.5	1.5	1.5	1.5	1.5	1.5	1.5	1.5	1.5	1.5	1.5	1.5	1.5	1.5	1.38654	1.3778	1.27712	1.1365	0.920752	0.815214	0.697499	0.596583	0.407347	0.27598	0.184323	0.120393	-0.0382948	-0.0356547	0.0108448	0.0972044	0.0475058	0.0978915	0.0929589	0.285411	0.387287	0.406976	0.551949	0.665119	0.757759	0.840224	0.960196	1.03788	1.05529	1.16718	1.05275	0.938361	0.919824	0.719701
chr10:Lama2		1.5	1.5	1.5	1.5	1.5	1.5	1.5	1.5	1.5	1.5	1.5	1.5	1.5	1.5	1.5	1.5	1.5	1.49034	1.43367	1.28928	1.12644	0.999707	0.900935	0.877934	0.749998	0.642631	0.495015	0.390175	0.358878	0.313868	0.302349	0.333577	0.323002	0.353518	0.308212	0.270752	0.297931	0.326091	0.398665	0.368548	0.334854	0.31054	0.304572	0.295835	0.301251	0.273426	0.26076	0.230636
chr1:Rgs7		1.5	1.5	1.5	1.5	1.5	1.5	1.48672	1.39296	1.38	1.34229	1.37918	1.37512	1.34951	1.29866	1.26871	1.31648	1.37976	1.35477	1.41475	1.2673	1.21405	1.08551	0.986298	0.875782	0.840909	0.70682	0.571543	0.448514	0.394504	0.29475	0.298598	0.248177	0.24378	0.181892	0.171658	0.109203	0.129531	0.189646	0.182518	0.185263	0.177941	0.151462	0.132696	0.102358	0.128444	0.112292	0.149917	0.149744
chr8:Tox3		1.5	1.5	1.5	1.5	1.5	1.5	1.38845	1.36067	1.33463	1.32131	1.35078	1.08784	0.983151	1.05328	0.867751	0.800682	0.728506	0.651742	0.561153	0.401357	0.216721	-0.0649807	-0.11	-0.134777	-0.380578	-0.459192	-0.483838	-0.573189	-0.705403	-0.800292	-0.753242	-0.791905	-0.505033	-0.390089	-0.478697	-0.439412	-0.458143	-0.5844	-0.606657	-0.508179	-0.507489	-0.769594	-0.725443	-0.843455	-0.85214	-0.756168	-0.749851	-0.623506
chr16:Son		1.5	1.5	1.5	1.5	1.5	1.5	1.4336	1.2268	0.993581	1.08352	1.10297	1.14976	1.13755	1.19596	1.20729	1.18841	1.10066	1.0377	1.00891	1.07571	0.990319	0.825638	0.687466	0.465804	0.373164	0.367187	0.305875	0.329517	0.352966	0.485823	0.55326	0.460282	0.627477	0.595266	0.744949	0.715071	0.613241	0.693025	0.796025	0.855639	0.818507	0.742084	0.777408	0.611102	0.608006	0.54781	0.559046	0.603289
chr10:Trhde		1.5	1.5	1.5	1.5	1.5	1.5	1.5	1.5	1.49858	1.5	1.5	1.5	1.5	1.5	1.5	1.5	1.5	1.5	1.5	1.48682	1.33531	1.25351	1.0505	0.94115	0.740148	0.689378	0.643781	0.499895	0.423482	0.291569	0.239482	0.160357	0.158264	0.146515	0.213391	0.22644	0.191268	0.116054	0.100458	0.0191203	0.0185351	-0.0153524	0.0111924	-0.00243242	0.0164692	-0.11019	-0.0489321	-0.0655795
chr11:Eml6		1.5	1.5	1.5	1.5	1.5	1.5	1.5	1.5	1.5	1.5	1.36642	1.27985	1.22372	1.18288	1.25681	1.18388	0.983835	0.770461	0.662934	0.525211	0.345603	0.176059	0.0259433	-0.146441	-0.254542	-0.438291	-0.344523	-0.263523	-0.228283	-0.229356	-0.307735	-0.217108	-0.00902739	0.112003	0.199856	0.254662	0.268994	0.32152	0.321736	0.518861	0.627588	0.800586	0.850669	0.958835	0.825272	0.738275	0.620628	0.559323
chr2:Tox2		1.5	1.5	1.5	1.5	1.5	1.5	1.5	1.5	1.48448	1.45756	1.35501	1.26323	1.28624	1.1164	1.11283	1.00465	0.865585	0.831054	0.836177	0.870554	0.757995	0.788782	0.60024	0.4845	0.586403	0.493676	0.543367	0.61579	0.561911	0.527106	0.529369	0.583615	0.57474	0.693873	0.674509	0.661041	0.709056	0.655501	0.693805	0.661999	0.741092	0.61545	0.631039	0.633662	0.561629	0.632273	0.607796	0.585249
chr18:Zfp608		1.5	1.5	1.5	1.5	1.5	1.5	1.5	1.5	1.5	1.5	1.5	1.5	1.5	1.5	1.5	1.5	1.35084	1.04439	0.820018	0.713561	0.43029	0.0944853	-0.0881361	-0.209156	-0.439987	-0.525204	-0.523121	-0.512844	-0.388968	-0.283241	-0.193705	0.00786132	0.234978	0.385034	0.452811	0.58361	0.589873	0.72287	0.665252	0.759712	0.77377	0.641747	0.502251	0.500083	0.595198	0.506718	0.49675	0.456955
chr17:Gm26917		1.5	1.5	1.5	1.5	1.5	1.5	1.5	1.49778	1.2559	1.1855	1.13556	0.909654	0.59267	0.575376	0.426969	0.272426	0.154264	-0.149922	-0.338415	-0.514664	-0.693453	-0.885746	-0.973515	-1.06982	-1.17019	-1.27301	-1.28805	-1.22528	-1.14083	-1.09968	-1.02923	-1.00636	-0.951067	-0.89685	-0.799594	-0.737126	-0.658014	-0.615852	-0.603035	-0.610397	-0.497427	-0.409854	-0.203397	-0.121272	-0.0375311	0.0879096	0.344776	0.438596
chr11:Cobl		1.5	1.5	1.5	1.5	1.5	1.5	1.5	1.49805	1.44323	1.26328	1.22042	1.06249	0.990689	0.920155	0.915889	0.969602	0.87186	0.860593	0.843131	0.788288	0.765874	0.681467	0.613591	0.511792	0.419883	0.307427	0.168174	0.0287804	-0.0400937	-0.0653335	-0.0765239	0.013856	0.0901869	0.108827	0.208175	0.235846	0.204576	0.178983	0.179145	0.218744	0.111942	0.0398866	0.0187548	-0.0509069	-0.0823611	-0.144239	-0.200712	-0.142426
chr10:Sh3rf3		1.5	1.5	1.5	1.5	1.5	1.5	1.5	1.5	1.5	1.5	1.5	1.5	1.5	1.5	1.5	1.5	1.40858	1.25198	1.01014	0.862949	0.6995	0.585827	0.545184	0.393729	0.288849	0.125141	0.0778003	0.0619963	0.122851	0.239326	0.240874	0.221873	0.212285	0.310509	0.405282	0.437575	0.595287	0.601344	0.597203	0.4837	0.438848	0.468031	0.459697	0.505485	0.459658	0.538244	0.525571	0.533435
chr16:Lrch3		1.5	1.5	1.5	1.5	1.5	1.5	1.5	1.40706	1.39333	1.31405	1.31208	1.18647	1.15181	1.22947	1.16451	1.14747	1.05665	0.984344	1.06224	0.95375	0.96606	0.884399	0.770285	0.734504	0.51912	0.516172	0.374911	0.379814	0.466693	0.422104	0.394698	0.436358	0.463196	0.542107	0.616577	0.766984	0.760937	0.779986	0.886281	0.888853	0.928957	0.867524	0.812899	0.724088	0.70202	0.624118	0.462422	0.403996
chr17:Arid1b		1.5	1.5	1.5	1.5	1.5	1.5	1.5	1.5	1.5	1.5	1.5	1.5	1.45082	1.38661	1.45574	1.36345	1.21988	1.0313	0.922488	0.765078	0.243788	0.102756	-0.131478	-0.0393786	-0.0311169	-0.245912	-0.366867	-0.315015	-0.293188	-0.313056	-0.27945	-0.124551	0.0434255	0.253549	0.0952894	0.0100634	0.23603	0.411272	0.254702	0.35124	0.549045	0.613216	0.563906	0.537374	0.607063	0.874501	0.858262	0.739818
chr6:Srgap3		1.5	1.5	1.5	1.5	1.5	1.5	1.5	1.5	1.34389	1.42076	1.43016	1.29235	1.22479	1.12528	1.12114	1.15217	1.0093	0.889638	0.611318	0.468287	0.242857	-0.0825449	-0.229858	-0.584946	-0.86988	-0.790294	-0.885088	-0.773934	-0.755498	-0.74476	-0.603046	-0.469907	-0.129574	0.0253792	0.321528	0.535823	0.486611	0.555202	0.648911	0.799325	1.01059	0.915207	0.998072	0.953994	0.789244	0.721458	0.731714	0.726802
chr7:Galnt18		1.5	1.5	1.5	1.5	1.5	1.5	1.5	1.5	1.5	1.5	1.5	1.5	1.35849	1.26186	1.13316	0.914841	0.757355	0.577788	0.134065	-0.00653525	-0.218914	-0.455034	-0.81172	-0.969521	-1.17765	-1.42475	-1.46174	-1.43606	-1.44126	-1.21386	-1.24777	-1.13061	-0.898471	-0.549819	-0.39064	-0.267603	0.00235311	0.0530004	0.0837226	0.345582	0.465847	0.519825	0.589209	0.458386	0.334424	0.517342	0.390983	0.376781
chr5:Ptpn13		1.5	1.5	1.5	1.5	1.5	1.5	1.47328	1.46714	1.34272	1.30656	1.35615	1.42974	1.33901	1.20683	1.32622	1.33055	1.26499	1.2368	1.09244	0.970355	0.913874	0.854902	0.672679	0.53622	0.406442	0.250587	0.192471	0.134431	0.060852	0.020634	0.0718244	-0.0469063	-0.120118	0.0821499	0.253	0.307133	0.303238	0.263732	0.365	0.429884	0.464004	0.430623	0.549475	0.558547	0.489097	0.290883	0.294511	0.320498
chr2:Chd6		1.5	1.5	1.5	1.5	1.5	1.5	1.5	1.5	1.43465	1.5	1.5	1.45286	1.5	1.46888	1.25484	1.07988	0.914294	0.860838	0.787813	0.604255	0.37176	0.395268	0.323688	0.259922	0.144231	0.166854	0.260264	0.252652	0.247903	0.261335	0.354012	0.442665	0.391749	0.517767	0.570941	0.64151	0.640416	0.627462	0.706382	0.665068	0.766007	0.728495	0.733	0.753643	0.824709	0.797618	0.761848	0.703128
chr3:Hs2st1		1.5	1.5	1.5	1.5	1.5	1.5	1.47714	1.5	1.5	1.5	1.5	1.5	1.5	1.5	1.5	1.5	1.41317	1.25316	1.05065	0.890842	0.745443	0.495198	0.366015	0.193155	0.180187	0.0471065	-0.138846	-0.240924	-0.226701	-0.10946	-0.027427	0.0143961	0.0322627	0.206623	0.353942	0.341665	0.34766	0.473482	0.757642	0.846308	0.858221	0.788159	0.751435	0.716866	0.704578	0.792015	0.844314	0.781678
chr3:Ttc14		1.5	1.5	1.5	1.5	1.5	1.5	1.5	1.5	1.5	1.5	1.5	1.5	1.5	1.5	1.5	1.5	1.38749	1.20837	0.886523	0.721956	0.482421	0.355918	0.29751	0.208055	0.0670055	-0.165528	-0.246796	-0.259216	-0.314203	-0.356904	-0.481175	-0.535285	-0.331881	-0.418191	-0.334178	-0.216835	-0.132297	-0.00813221	0.100726	0.196931	0.345965	0.571126	0.717689	0.642732	0.70225	0.682604	0.581544	0.628458
chr6:RP24-127M20.8		1.5	1.5	1.5	1.5	1.5	1.5	1.5	1.5	1.5	1.5	1.5	1.5	1.5	1.5	1.5	1.5	1.3523	1.22052	1.03995	0.963139	0.829965	0.647549	0.543151	0.407013	0.327199	0.291932	0.187809	0.133948	0.0842588	0.00672281	0.00828069	0.00881509	0.0412333	0.0561349	0.087107	0.103198	0.152484	0.207848	0.185916	0.178676	0.326639	0.335948	0.335661	0.296125	0.258874	0.156537	0.068828	-0.065783
chr6:Gm30524		1.5	1.5	1.5	1.5	1.5	1.5	1.5	1.5	1.31063	1.45782	1.39269	1.3771	1.33143	1.39906	1.3444	1.25941	1.22147	1.17676	1.13817	1.19832	1.01488	0.861979	0.857277	0.820327	0.778072	0.746448	0.758989	0.689647	0.79088	0.773288	0.541824	0.466502	0.398313	0.344435	0.235911	0.0787694	-0.0138152	0.056674	0.10032	-0.0518461	-0.0724786	0.0438518	0.0494646	-0.017419	-0.0866628	-0.10648	-0.0101585	0.0761371
chr1:Clasp1		1.5	1.5	1.5	1.5	1.5	1.5	1.5	1.5	1.5	1.5	1.5	1.5	1.5	1.47497	1.37764	1.4438	1.49127	1.34139	1.3033	1.43671	1.06905	0.854933	0.604136	0.543797	0.501185	0.568648	0.508685	0.513561	0.416553	0.349813	0.0821823	0.233054	0.32318	0.409374	0.263128	0.17895	0.0576313	0.108891	0.220168	0.157999	0.26848	0.440027	0.376476	0.429082	0.520218	0.55718	0.549342	0.520614
chr16:Crebbp		1.5	1.5	1.5	1.5	1.5	1.5	1.5	1.5	1.5	1.5	1.5	1.5	1.5	1.5	1.5	1.5	1.5	1.37212	1.29071	1.06266	0.93152	0.74929	0.650204	0.371955	0.236246	-0.0804303	-0.194625	-0.323611	-0.204684	-0.160495	-0.133522	-0.157846	-0.150249	-0.27756	-0.150254	-0.0468022	0.142195	0.259127	0.416285	0.42726	0.341657	0.423954	0.547842	0.372243	0.647889	0.772006	0.759456	0.834116
chr15:Tnrc6b		1.5	1.5	1.5	1.5	1.5	1.5	1.5	1.5	1.5	1.5	1.5	1.34714	1.27735	1.15771	1.20459	1.28502	1.12249	1.02589	1.07241	0.68616	0.838543	0.806421	0.816138	0.743437	0.546888	0.487708	0.353256	0.399626	0.504612	0.527583	0.628233	0.293952	0.407765	0.413694	0.616239	0.600506	0.334403	0.298858	0.198952	0.15206	0.0553916	-0.102296	0.0200485	-0.0179396	0.00113925	-0.0767498	-0.162342	0.212806
chr2:Rif1		1.5	1.5	1.5	1.5	1.5	1.5	1.41483	1.33833	1.38169	1.30425	1.28836	1.16184	1.00404	0.902275	0.952657	1.04032	0.990155	1.08914	1.07006	0.864567	0.865177	0.745968	0.710209	0.829375	0.861982	0.815986	0.692241	0.739041	0.781609	0.831997	0.869334	0.821214	0.807703	0.746245	0.6061	0.561383	0.53679	0.564667	0.508466	0.496657	0.403816	0.396711	0.496474	0.533534	0.650836	0.758303	0.785698	0.718682
chr5:Kmt2e		1.5	1.5	1.5	1.5	1.5	1.5	1.5	1.5	1.5	1.5	1.5	1.5	1.4645	1.34302	1.30056	1.21712	1.06918	0.76152	0.583659	0.53256	0.385312	-0.224548	-0.240278	-0.330897	-0.452894	-0.556071	-0.809902	-0.810814	-0.884872	-0.909082	-0.751184	-0.598908	-0.383966	-0.31044	-0.33757	-0.323456	-0.303944	-0.024219	-0.0477643	0.176901	0.157407	0.166175	0.125395	0.361592	0.368084	0.566038	0.882561	0.734426
chr7:Dock1		1.5	1.5	1.5	1.5	1.5	1.5	1.5	1.5	1.49489	1.35454	1.25813	1.14084	1.15142	0.997756	1.10941	1.05469	0.832588	0.664977	0.570993	0.365819	0.277754	0.137164	0.0295526	-0.165051	-0.104071	-0.283322	-0.274177	-0.272784	-0.179862	-0.0769481	-0.0791466	0.0767454	0.13084	0.198287	0.266521	0.312492	0.482315	0.509413	0.593749	0.458978	0.613081	0.746698	0.794968	0.845615	0.930849	1.06364	1.05935	0.943352
chr4:Dock7		1.5	1.5	1.5	1.5	1.5	1.5	1.5	1.5	1.5	1.5	1.5	1.5	1.5	1.5	1.5	1.5	1.5	1.47642	1.10713	0.731269	0.723933	0.507126	0.0788668	-0.214881	-0.333806	-0.572799	-0.750582	-0.696752	-0.690052	-0.878511	-0.660289	-0.568134	-0.549687	-0.632863	-0.368793	-0.255442	-0.177692	-0.189198	-0.0754896	0.00130146	0.188688	0.0528809	0.0177516	0.120627	0.328748	0.124847	0.00729462	-0.0877579
chr7:Chd2		1.5	1.5	1.5	1.5	1.5	1.5	1.5	1.5	1.5	1.5	1.5	1.5	1.5	1.49522	1.48049	1.21881	1.22238	1.04195	0.685661	0.594704	0.391463	0.314037	0.225845	0.193043	-0.00803946	-0.215026	-0.0934933	-0.216212	-0.249854	0.0162079	-0.124497	0.0677328	0.274332	0.283546	0.282768	0.525415	0.584996	0.589897	0.615915	0.647132	0.648554	0.891726	0.973727	0.819683	0.827621	0.858993	0.735178	0.84982
chr18:Pdgfrb		1.5	1.5	1.5	1.5	1.5	1.5	1.5	1.5	1.5	1.5	1.5	1.5	1.5	1.5	1.5	1.5	1.40596	1.41718	1.30839	1.19499	1.05691	0.862051	0.756206	0.594398	0.451561	0.482068	0.36037	0.365797	0.269004	0.244076	0.188497	0.199766	0.281317	0.156064	0.057709	0.0574284	-0.0112083	-0.0918567	-0.133634	-0.119811	-0.100192	-0.087359	-0.133125	-0.299753	-0.33988	-0.180198	-0.420061	-0.582556
chr1:Tmco1		1.5	1.5	1.5	1.5	1.5	1.5	1.5	1.5	1.5	1.5	1.5	1.5	1.5	1.5	1.5	1.5	1.5	1.5	1.5	1.44176	1.41284	1.17897	1.00835	0.93283	0.757125	0.442497	0.355663	0.213983	0.12037	0.0439646	0.0294315	0.193466	0.284644	0.250511	0.355972	0.305799	0.440783	0.329932	0.324392	0.237308	0.243991	0.185851	-0.0228643	-0.127344	-0.266427	-0.42273	-0.373308	-0.410205
chr10:Ntn4		1.5	1.5	1.5	1.5	1.5	1.5	1.47213	1.47235	1.36909	1.43904	1.2642	1.29317	1.28294	1.25515	1.14301	1.05236	1.15817	1.22187	1.14987	1.0449	0.809965	0.813373	0.590811	0.505773	0.510126	0.512853	0.518074	0.476102	0.520052	0.481153	0.478346	0.504493	0.491615	0.54057	0.508776	0.474278	0.554968	0.419433	0.37232	0.265521	0.245433	0.214702	0.355609	0.38454	0.393714	0.448863	0.434665	0.295451
chr10:Appl2		1.5	1.5	1.5	1.5	1.5	1.5	1.5	1.5	1.5	1.5	1.5	1.5	1.5	1.5	1.5	1.5	1.5	1.37801	1.16946	0.980314	0.825986	0.832324	0.615194	0.546452	0.335263	0.0319024	-0.0243744	-0.096742	-0.0372796	-0.0377729	-0.000924348	0.129	0.0932203	0.0186875	0.123677	0.298537	0.515622	0.625834	0.746506	0.67668	0.706574	0.715755	0.601114	0.603828	0.642691	0.422868	0.275288	0.289748
chr12:Mark3		1.5	1.5	1.5	1.5	1.5	1.5	1.5	1.5	1.5	1.5	1.5	1.45101	1.42292	1.2654	1.21525	1.01764	0.811069	0.709563	0.432155	0.457997	0.332463	0.279315	0.205124	-0.00416867	0.0185233	-0.134281	-0.156152	-0.159178	-0.0920927	-0.0417662	-0.0996241	-0.0998383	-0.097366	-0.0318224	0.0919541	0.188205	0.298859	0.55472	0.726355	0.847542	0.985907	1.09223	1.20792	1.09087	0.953685	0.847957	0.805459	0.714915
chr5:Fam193a		1.5	1.5	1.5	1.5	1.5	1.5	1.5	1.5	1.5	1.5	1.5	1.5	1.5	1.5	1.5	1.5	1.4339	1.33472	1.0061	0.720745	0.544717	0.274656	0.10345	0.0252269	-0.0789012	-0.287127	-0.0829636	-0.124803	-0.150339	-0.171234	-0.0800893	0.036457	0.111884	0.159163	0.30756	0.501585	0.65611	0.52569	0.686561	0.55137	0.687211	0.764164	0.754324	0.814603	0.889327	0.635252	0.489765	0.402136
chr13:Arhgef28		1.5	1.5	1.5	1.5	1.5	1.5	1.49485	1.5	1.3705	1.37314	1.37946	1.27911	1.15341	1.21597	1.22946	1.03933	0.871021	0.848356	0.690287	0.665879	0.487415	0.443541	0.405761	0.455223	0.403877	0.247447	0.27407	0.291999	0.260091	0.259825	0.23255	0.191993	0.226908	0.179669	0.225045	0.0857212	0.121248	0.202464	0.279501	0.27106	0.349301	0.297051	0.294578	0.23832	0.210117	0.160735	0.206891	0.172203
chr14:Pabpn1		1.5	1.5	1.5	1.5	1.5	1.5	1.5	1.5	1.5	1.5	1.45338	1.45017	1.32068	1.08697	1.11883	0.848402	0.584907	0.399728	0.496283	0.373028	0.410863	0.331136	0.178626	0.00159208	-0.0262214	-0.230647	-0.225454	-0.209366	-0.141845	-0.359646	-0.239109	-0.140306	-0.147602	-0.128046	0.0816172	0.130771	0.27519	0.288636	0.366373	0.277507	0.369907	0.259926	0.166472	0.149099	0.117627	0.0911461	0.145768	-0.015829
chrX:Atp11c		1.5	1.5	1.5	1.5	1.5	1.5	1.5	1.3727	1.34592	1.32229	1.19973	1.11814	1.09101	0.995535	0.977728	0.934351	0.633869	0.759682	0.822022	0.690472	0.633781	0.835324	0.816875	0.669355	0.677904	0.617528	0.634809	0.794215	0.634513	0.659585	0.793246	0.962162	0.838324	0.771438	0.72231	0.750151	0.739749	0.714587	0.784916	0.716922	0.72585	0.626472	0.550953	0.746196	0.708314	0.802964	0.975331	1.09874
chr9:Vps13c		1.5	1.5	1.5	1.5	1.5	1.5	1.5	1.5	1.42311	1.40312	1.22062	1.22665	1.04452	0.939328	0.986078	0.79182	0.724793	0.740267	0.721301	0.624915	0.599605	0.636182	0.608539	0.589322	0.643897	0.459101	0.632551	0.638932	0.610065	0.469877	0.5936	0.558962	0.622748	0.588368	0.653467	0.830008	0.945289	0.891841	0.815149	0.779355	0.950047	0.872586	0.941271	0.837195	0.800364	0.858407	0.727778	0.733167
chr18:Cables1		1.5	1.5	1.5	1.5	1.5	1.5	1.5	1.5	1.45928	1.41597	1.28791	1.17175	1.1235	1.07188	0.922923	0.881915	0.792701	0.719645	0.737475	0.658706	0.553637	0.48216	0.447412	0.450338	0.339431	0.270894	0.218164	0.187094	0.213415	0.179769	0.291657	0.335882	0.491081	0.590401	0.575779	0.710133	0.820557	0.85623	0.922671	0.929345	0.907509	0.844724	0.920763	0.917749	0.871404	0.949388	0.950216	0.874794
chrX:Brwd3		1.5	1.5	1.5	1.5	1.5	1.5	1.5	1.5	1.5	1.5	1.5	1.4878	1.44268	1.32369	1.1851	1.10338	1.02162	0.951	0.894386	0.716074	0.647722	0.595249	0.653619	0.514669	0.396513	0.416854	0.504468	0.450432	0.388245	0.232563	0.362914	0.510517	0.36906	0.39491	0.669924	0.801217	0.882689	0.783562	0.734579	0.760328	0.79095	0.66228	0.626916	0.717796	0.727898	0.708777	0.637139	0.525117
chr3:Amy1		1.5	1.5	1.5	1.5	1.5	1.5	1.47908	1.4537	1.5	1.5	1.5	1.5	1.5	1.44778	1.33985	1.32721	1.19271	1.08527	1.02272	0.951709	0.752126	0.675097	0.475364	0.264975	0.263609	0.140779	0.0851439	0.0513696	-0.0363361	-0.116259	-0.186829	-0.116685	0.0853386	0.101374	0.264948	0.423291	0.502468	0.708689	0.900078	1.00152	1.05228	1.10109	1.03131	0.901808	0.92161	0.903467	0.68678	0.617623
chr9:Gramd1b		1.5	1.5	1.5	1.5	1.5	1.5	1.5	1.5	1.44835	1.3383	1.2221	1.031	1.12764	1.15279	0.789683	0.876059	0.869856	0.763778	0.456263	0.322681	0.0163573	-0.198377	-0.459912	-0.731258	-0.867941	-0.812557	-0.626122	-0.822281	-0.772901	-0.718363	-0.401009	-0.159226	0.312714	0.413614	0.524227	0.637728	0.490033	0.313082	0.292643	0.303908	0.655094	0.470133	0.578922	0.380707	0.529277	0.407957	0.229475	0.469584
chr18:Ankhd1		1.5	1.5	1.5	1.5	1.5	1.5	1.5	1.5	1.5	1.5	1.5	1.5	1.5	1.5	1.412	1.47734	1.39688	1.22524	1.02059	0.853845	0.737655	0.65301	0.321895	0.321739	0.328789	0.305468	0.436902	0.258357	0.161699	0.115712	0.142214	0.14201	0.0992436	-0.0039881	0.0201104	-0.0676143	-0.050329	-0.158749	-0.0944133	0.0608683	0.155625	0.301489	0.361687	0.37309	0.514057	0.357392	0.413311	0.276819
chr16:Ccdc50		1.5	1.5	1.5	1.5	1.5	1.5	1.5	1.5	1.5	1.5	1.5	1.5	1.28179	1.05073	0.782905	0.528035	0.425543	0.245946	0.287367	0.0103073	-0.094625	-0.321052	-0.555999	-0.767028	-1.00878	-0.983013	-1.04587	-1.09964	-1.0574	-1.20727	-1.2203	-1.13728	-1.01203	-0.763422	-0.408783	-0.208172	-0.0980461	0.0139056	0.0206541	-0.0870954	-0.127456	-0.282129	-0.472591	-0.404928	-0.424908	-0.513576	-0.50587	-0.535243
chr15:Gm20732		1.5	1.5	1.5	1.5	1.5	1.5	1.5	1.5	1.5	1.5	1.5	1.5	1.49037	1.28536	1.39714	1.40948	1.3272	1.04144	0.961071	0.820845	0.675489	0.4711	0.194305	0.0462501	-0.0467153	-0.21456	-0.267189	-0.231208	-0.0306164	0.170651	0.175021	0.130652	0.194078	0.402129	0.326634	0.507177	0.721523	0.655629	0.723663	0.754765	0.687501	0.810703	0.851556	0.899492	0.795086	0.956506	0.804387	0.799079
chr11:Abca6		1.5	1.5	1.5	1.5	1.5	1.5	1.5	1.5	1.5	1.5	1.5	1.5	1.5	1.5	1.5	1.5	1.46327	1.33607	1.25004	1.00985	0.913648	0.78548	0.576261	0.55606	0.539772	0.480029	0.484392	0.375208	0.383823	0.331223	0.321672	0.243231	0.261338	0.383099	0.382252	0.254587	0.370809	0.297081	0.332464	0.291143	0.337155	0.351283	0.386758	0.541746	0.39714	0.182809	0.306773	0.131743
chr9:Phip		1.5	1.5	1.5	1.5	1.5	1.5	1.5	1.5	1.39027	1.36908	1.27569	1.47035	1.35505	1.31323	1.26892	1.18651	0.519221	0.645617	0.234267	0.0282275	-0.491562	-0.770225	-1.1977	-1.37457	-1.32993	-1.2638	-1.23867	-0.826603	-1.12718	-1.16406	-0.863932	-0.653328	-0.309773	-0.085301	0.0824327	0.0380136	-0.318701	-0.11441	-0.0795523	0.167045	0.578196	0.493289	0.81018	0.871781	1.08953	0.932387	1.00368	1.5
chr17:Akap8l		1.5	1.5	1.5	1.5	1.5	1.5	1.5	1.5	1.5	1.5	1.38169	1.5	1.47697	1.5	1.5	1.49559	1.31935	1.32737	1.16336	0.974484	0.820818	0.692567	0.425492	0.344835	0.169668	0.0372568	-0.139525	-0.121856	-0.243731	-0.156857	-0.0851371	0.0519988	-0.0497211	0.140533	0.323271	0.438418	0.594998	0.706994	0.75223	0.723178	0.731693	0.755112	0.793363	1.06828	1.19032	1.07891	0.950692	0.837698
chr4:Srrm1		1.5	1.5	1.5	1.5	1.5	1.5	1.46725	1.5	1.32183	1.32656	1.4645	1.5	1.5	1.5	1.5	1.5	1.5	1.5	1.46911	1.44151	1.10645	0.665893	0.380404	0.0573208	0.0327291	0.0498512	-0.0224203	-0.278728	-0.066644	-0.223893	-0.0760158	-0.032374	0.202331	0.0517782	0.0703559	0.0938608	0.153946	0.301093	0.267243	0.194055	0.31588	0.278777	0.527974	0.560629	0.761119	0.815187	0.849068	0.684895
chr4:Zmym4		1.5	1.5	1.5	1.5	1.5	1.5	1.5	1.5	1.5	1.47608	1.34448	1.1869	0.957174	0.959929	0.852891	0.785842	0.599808	0.543938	0.468595	0.371826	0.226843	0.050381	-0.0270228	-0.135184	-0.435442	-0.509732	-0.664571	-0.829049	-0.732564	-0.8224	-0.706142	-0.646374	-0.536525	-0.39622	-0.329581	-0.224151	-0.371052	-0.432316	-0.242281	-0.372687	-0.375477	-0.61113	-0.678161	-0.716453	-0.78804	-0.551169	-0.527972	-0.343113
chr15:Trio		1.5	1.5	1.5	1.5	1.5	1.5	1.5	1.5	1.5	1.5	1.40308	1.43998	1.19336	0.954581	0.894997	1.02884	0.774929	0.562777	0.459588	0.0813042	-0.0345945	-0.0610257	-0.326105	-0.344748	-0.498785	-0.702966	-1.11431	-1.14246	-1.10626	-0.904272	-0.563257	-0.427675	-0.48633	-0.453036	-0.295717	-0.277129	-0.18538	-0.206552	0.0403689	0.0289204	0.0169762	0.112578	-0.00762626	-0.0234155	0.0864124	0.0975212	0.106695	0.172368
chr5:Tmed2		1.5	1.5	1.5	1.5	1.5	1.5	1.5	1.35989	1.31917	1.16284	1.19871	1.31826	1.5	1.5	1.5	1.5	1.5	1.5	1.36902	1.29408	1.22675	1.23559	1.09527	0.899975	0.811573	0.739705	0.650234	0.625895	0.454216	0.584418	0.59175	0.572004	0.451499	0.483022	0.446683	0.467175	0.436963	0.300859	0.272612	0.431624	0.403472	0.367083	0.24722	0.230725	0.0993671	0.155459	0.00835067	0.0401462
chr5:Ablim2		1.5	1.5	1.5	1.5	1.5	1.5	1.5	1.5	1.5	1.5	1.40424	1.18643	1.0805	1.11435	1.03261	0.824048	0.80734	0.971258	1.02136	1.04408	1.07634	1.17707	1.15523	1.02338	1.10791	0.990554	0.928434	0.831455	0.812077	0.814385	0.805514	0.710015	0.482335	0.553862	0.634743	0.414413	0.338876	0.334085	0.263322	0.145248	0.0135275	-0.151831	-0.165488	-0.165767	-0.231012	-0.39068	-0.291041	-0.223066
chr11:Epn2		1.5	1.5	1.5	1.5	1.5	1.5	1.5	1.46435	1.5	1.5	1.5	1.5	1.5	1.5	1.5	1.47168	1.20821	1.04744	0.911541	0.72968	0.406442	0.132996	0.0223059	-0.0713392	-0.173129	-0.518575	-0.432718	-0.518618	-0.573674	-0.591054	-0.498652	-0.468583	-0.342704	-0.23633	-0.334325	-0.317831	0.0741763	-0.00235454	0.0526995	0.2066	0.391526	0.437554	0.26421	0.256116	0.213943	0.443429	0.415909	0.324755
chr14:Kat6b		1.5	1.5	1.5	1.5	1.5	1.5	1.5	1.5	1.5	1.5	1.5	1.5	1.5	1.33035	1.27778	1.22554	1.36757	1.25367	1.10531	0.586617	0.268988	-0.0229215	-0.112584	-0.234652	-0.158688	-0.112763	-0.255116	-0.584783	-0.40167	-0.328241	-0.28538	-0.0520441	0.0879459	-0.0504036	0.098602	0.236025	0.143227	0.320275	0.427591	0.217855	0.280313	0.451816	0.564617	0.49348	0.782772	0.986975	0.967668	0.917684
chr5:Htt		1.5	1.5	1.5	1.5	1.5	1.5	1.5	1.5	1.40469	1.5	1.5	1.46656	1.5	1.36383	1.23127	0.997987	0.772741	0.461411	0.43079	0.176606	0.00584508	-0.269385	-0.139382	-0.55587	-0.676888	-0.746194	-0.766227	-0.722413	-0.572747	-0.472105	-0.245423	-0.130775	0.0411821	0.00566743	0.295493	0.582218	0.754424	0.888456	1.0147	1.09093	1.37557	1.2271	1.19503	1.25326	1.1719	1.12897	1.07853	0.970806
chr3:Odf2l		1.5	1.5	1.5	1.5	1.5	1.5	1.5	1.40552	1.44732	1.40591	1.5	1.40172	1.41712	1.36662	1.31836	1.31272	1.26246	1.14255	1.09317	0.99587	0.957045	0.690099	0.753379	0.676427	0.606014	0.503314	0.409143	0.364011	0.421638	0.364788	0.380385	0.270297	0.299509	0.324509	0.416807	0.358607	0.505397	0.500195	0.603091	0.5644	0.6609	0.477698	0.610194	0.755881	0.646933	0.626733	0.749152	0.716633
chr5:Ube3c		1.5	1.5	1.5	1.5	1.5	1.5	1.5	1.5	1.40749	1.5	1.17619	0.893262	1.05372	1.07318	1.08738	1.03904	0.905387	0.884053	0.773713	0.659119	0.197983	0.186345	0.0933187	-0.0227212	-0.0592944	-0.39433	-0.35829	-0.486165	-0.614723	-0.546344	-0.888696	-0.672005	-0.687333	-0.493225	-0.518823	-0.434219	-0.126203	0.0466362	0.230395	0.349736	0.578389	1.03847	1.19451	1.32634	1.26525	1.44702	1.4287	1.25632
chr1:Gm973		1.5	1.5	1.5	1.5	1.5	1.5	1.5	1.5	1.47915	1.41038	1.22933	1.16307	1.21027	1.13901	1.08932	0.944249	0.692678	0.571726	0.377549	0.19943	-0.0193255	-0.231101	-0.356997	-0.534556	-0.652904	-0.982662	-1.18906	-1.23665	-1.07035	-1.04409	-0.950761	-0.734127	-0.486662	-0.36809	-0.167052	0.0247878	0.276866	0.365821	0.516313	0.596237	0.823839	0.831213	0.78226	0.676832	0.663369	0.583764	0.458723	0.259012
chrX:Gucy2f		1.5	1.5	1.5	1.5	1.5	1.5	1.5	1.5	1.5	1.5	1.5	1.40596	1.36156	1.36347	1.42324	1.32188	1.1476	1.13683	1.04768	0.965888	0.80817	0.729631	0.633646	0.569447	0.449387	0.168967	0.231036	0.183518	0.144711	0.204473	0.103793	0.196769	0.305215	0.215217	0.253374	0.310291	0.484703	0.461809	0.443395	0.474538	0.552503	0.638983	0.58061	0.494068	0.515522	0.550963	0.523982	0.565663
chr13:Dusp22		1.5	1.5	1.5	1.5	1.5	1.5	1.5	1.41992	1.41429	1.29924	1.31462	1.268	1.19073	1.09918	0.987966	0.864659	0.882982	0.851671	0.89871	0.815631	0.907071	0.808477	0.76432	0.824889	0.884199	0.76241	0.758526	0.651965	0.491088	0.490564	0.512386	0.414888	0.368925	0.324642	0.284282	0.318864	0.418534	0.478345	0.597219	0.578881	0.735376	0.781704	0.861594	0.855382	0.936839	0.853016	0.803572	0.762793
chr11:Rabep1		1.5	1.5	1.5	1.5	1.5	1.5	1.5	1.5	1.5	1.5	1.5	1.2187	1.11456	1.08173	1.18942	1.15757	1.24295	1.01037	0.883777	0.686547	0.62508	0.613617	0.728919	0.525013	0.341888	0.163565	0.19404	-0.175416	0.15404	0.0745932	0.136966	0.271796	0.443302	0.280571	0.524616	0.730461	0.615539	0.643203	0.645541	0.45843	0.342498	0.232895	0.0609555	0.134642	0.2969	0.26705	0.182071	0.14809
chr18:Spire1		1.5	1.5	1.5	1.5	1.5	1.5	1.5	1.5	1.46554	1.5	1.40731	1.39339	1.30093	1.48075	1.5	1.5	1.5	1.5	1.38722	1.17795	0.730762	0.5417	0.337773	0.0162207	-0.0273007	-0.173608	-0.399064	-0.505256	-0.787159	-0.654439	-0.53196	-0.479894	-0.0732511	0.0865431	0.166142	0.278057	0.369166	0.565252	0.615322	0.768831	0.706862	0.713029	0.860705	0.778872	0.73253	0.730592	0.587525	0.490425
chr16:Scaf4		1.5	1.5	1.5	1.5	1.5	1.5	1.4368	1.40907	1.5	1.28947	1.19956	1.23026	1.3434	1.44245	1.5	1.24416	1.22388	1.15574	1.18544	0.689138	0.742922	0.587392	0.594788	0.344131	0.225955	0.00583758	-0.0344369	-0.140251	-0.0170052	-0.0298963	0.145595	0.223037	0.424208	0.400083	0.649555	0.739483	0.896114	0.910399	1.13402	1.15342	1.07293	1.12897	1.12286	1.06807	0.953219	0.671114	0.573246	0.485246
chr1:Khdrbs2		1.5	1.5	1.5	1.5	1.5	1.5	1.5	1.5	1.46748	1.38943	1.26673	1.18336	0.928909	0.73164	0.459686	0.721226	0.677318	0.543922	0.299844	0.132369	0.0937778	0.168675	0.035402	-0.0110739	0.232301	0.252382	0.0215714	0.0304152	0.111083	0.33211	0.600176	0.455192	0.311991	0.102047	0.160632	0.0406348	-0.0518694	-0.210501	-0.139373	-0.18593	-0.206911	-0.481861	-0.200687	0.0697773	0.225858	0.320683	0.212893	0.313783
chr12:Sos2		1.5	1.5	1.5	1.5	1.5	1.5	1.5	1.5	1.5	1.5	1.5	1.5	1.5	1.21213	1.18904	1.36941	1.15121	1.00061	0.715771	0.626769	0.531906	0.556242	0.406959	0.399625	0.476018	0.423456	0.172294	0.076024	0.313238	0.319281	0.540601	0.42108	0.567995	0.682559	0.687171	0.55244	0.58579	0.822342	0.921337	0.736069	0.821673	0.773059	0.863852	0.674438	0.727998	0.822787	0.942519	0.660084
chr2:1110051M20Rik		1.5	1.5	1.5	1.5	1.5	1.5	1.5	1.5	1.5	1.5	1.5	1.5	1.295	1.34539	1.23802	1.0132	1.10329	1.16789	1.01088	0.750807	0.442343	0.278721	0.36502	0.311403	0.13905	-0.210365	0.0768234	-0.294022	-0.365664	-0.34641	-0.237185	-0.237009	0.016681	-0.0623811	-0.0125411	0.0872848	0.339567	0.183877	0.381621	0.546848	0.526937	0.604541	0.786984	0.705046	0.712945	0.620965	0.704811	0.701041
chr6:Tspan9		1.5	1.5	1.5	1.5	1.5	1.5	1.5	1.42319	1.37669	1.1939	1.15152	1.17733	1.06262	1.2095	1.22835	1.23532	1.16045	1.17863	1.10444	1.17911	1.21543	0.92862	0.847075	0.683132	0.441843	0.37318	0.435062	0.489054	0.424282	0.429362	0.508249	0.495094	0.688869	0.703533	0.88509	0.976037	0.925436	1.03174	0.858393	0.902256	0.993109	0.676455	0.58886	0.674804	0.460384	0.239354	0.144344	0.2577
chr17:Fbxo11		1.5	1.5	1.5	1.5	1.5	1.5	1.5	1.5	1.5	1.5	1.5	1.5	1.49716	1.05543	1.21914	1.11404	0.888618	0.698434	0.592167	0.443279	0.169865	0.0389421	0.271752	0.145452	0.143404	-0.253047	-0.33125	-0.579855	-0.494858	-0.392167	-0.564464	-0.65418	-0.667362	-0.954989	-0.830579	-0.819495	-0.870818	-0.969376	-0.766904	-0.769222	-0.845738	-0.959577	-0.931249	-0.822592	-0.203301	0.0908209	0.39224	0.568447
chr1:Rev1		1.5	1.5	1.5	1.5	1.5	1.5	1.5	1.34531	1.38169	1.5	1.5	1.5	1.5	1.5	1.3597	1.24538	1.38041	1.3118	1.46535	1.0037	0.519064	0.5391	0.583913	0.49755	0.522768	0.557646	0.46766	0.419732	0.192563	-0.0500875	0.107133	0.350231	0.416558	0.247014	0.144033	0.0495335	0.0418252	0.242181	0.425599	0.600939	0.763162	0.696322	0.643163	0.465121	0.377021	0.540769	0.621373	0.566671
chr19:9930021J03Rik		1.5	1.5	1.5	1.5	1.5	1.5	1.5	1.5	1.43777	1.5	1.5	1.5	1.5	1.5	1.5	1.43982	1.5	1.30616	1.28942	1.2278	0.613785	0.150276	-0.17926	-0.548868	-0.827141	-0.854076	-0.784256	-1.23509	-1.29642	-1.41428	-1.40577	-1.44076	-1.27046	-1.12717	-1.06236	-1.16399	-1.03445	-0.902453	-0.739457	-0.668678	-0.432599	-0.22634	0.0999722	0.350305	0.54887	0.578945	0.950296	1.03163
chr1:Ikzf2		1.5	1.5	1.5	1.5	1.5	1.5	1.4231	1.36842	1.1701	1.37857	1.15487	1.28866	1.35119	1.02522	0.759827	0.766825	0.849499	0.912034	0.763389	0.775233	0.572341	0.716924	0.50918	0.408674	0.514871	0.355123	0.231267	0.00386867	-0.0290574	-0.0590525	0.0503385	0.0178061	0.0257827	0.186464	0.283343	0.200385	0.45601	0.475343	0.741047	0.770983	0.840673	0.83612	0.882126	0.840225	0.671684	0.50328	0.563371	0.531951
chr4:Scmh1		1.5	1.5	1.5	1.5	1.5	1.5	1.5	1.5	1.5	1.5	1.5	1.5	1.39475	1.18301	1.30407	1.23333	0.918209	0.782431	0.355795	0.295835	-0.0605267	-0.566364	-0.461929	-0.76333	-0.790972	-0.972301	-0.979347	-0.901477	-0.789123	-0.870176	-0.810584	-1.05346	-0.361551	-0.321886	-0.0761472	-0.273094	-0.202296	-0.0443098	0.09326	0.400117	0.840657	0.991097	1.11946	1.40263	1.35851	1.30333	1.4484	1.46543
chr11:Acaca		1.5	1.5	1.5	1.5	1.5	1.5	1.5	1.5	1.5	1.45483	1.5	1.5	1.5	1.5	1.5	1.5	1.38068	1.17108	1.08921	1.07301	0.874169	0.389122	0.28237	-0.0385215	-0.244082	-0.566218	-0.66923	-0.701635	-0.771049	-0.856609	-0.795851	-0.249066	-0.117756	-0.368341	-0.372769	-0.245149	-0.129921	-0.256666	-0.134081	0.0822934	0.441141	0.34462	-0.0833709	-0.137184	0.0282371	-0.133392	-0.0745501	0.105436
chr7:Zfp536		1.49889	1.49889	1.49889	1.49889	1.49889	1.49889	1.5	1.5	1.5	1.5	1.5	1.5	1.5	1.5	1.33807	1.14743	1.06294	0.871474	0.778958	0.729518	0.665682	0.651883	0.441647	0.303281	0.368041	0.329059	0.370929	0.306539	0.250325	0.353012	0.172482	0.132775	0.2453	0.357498	0.394393	0.213509	0.427521	0.523615	0.712092	0.739492	0.692419	0.807426	0.886765	0.82172	0.806523	0.923352	1.1004	0.990749
chr4:Frem1		1.49294	1.49294	1.49294	1.49294	1.49294	1.49294	1.5	1.5	1.5	1.5	1.5	1.5	1.5	1.5	1.5	1.5	1.5	1.49559	1.34434	1.14657	0.934101	0.762295	0.633051	0.489743	0.411997	0.34455	0.236776	0.180711	0.155049	0.235386	0.227757	0.212621	0.190956	0.282861	0.329575	0.313355	0.365765	0.448957	0.505726	0.482714	0.461874	0.56855	0.568202	0.613407	0.461878	0.45946	0.416075	0.279177
chr5:Mapk10		1.49018	1.49018	1.49018	1.49018	1.49018	1.49018	1.47219	1.44265	1.41211	1.48181	1.49982	1.42433	1.48311	1.41632	1.48436	1.47329	1.4254	1.36046	1.23688	1.09054	0.942935	0.830534	0.765523	0.566216	0.554766	0.429421	0.295149	0.176341	0.254488	0.179048	0.215602	0.227404	0.244501	0.32102	0.412957	0.398191	0.512135	0.678862	0.758704	0.647718	0.712269	0.777661	0.767105	0.816023	0.792564	0.707661	0.707571	0.56371
chr10:Map3k5		1.48962	1.48962	1.48962	1.48962	1.48962	1.48962	1.5	1.48759	1.5	1.45332	1.38138	1.30538	1.29834	1.25194	1.22333	1.14705	1.10517	1.03763	0.976612	0.894349	0.862315	0.768681	0.683994	0.578747	0.510672	0.397523	0.399375	0.37981	0.411772	0.407811	0.372965	0.344169	0.403683	0.489201	0.495066	0.491142	0.539703	0.532637	0.59051	0.550668	0.558247	0.525918	0.552599	0.481169	0.458762	0.460645	0.466573	0.485452
chrX:Cnksr2		1.48776	1.48776	1.48776	1.48776	1.48776	1.48776	1.49175	1.42716	1.42778	1.45625	1.45422	1.36997	1.42858	1.27506	1.22768	1.1673	1.14479	1.09132	1.12951	1.02463	0.964989	0.809553	0.801616	0.679971	0.623301	0.659499	0.642877	0.642796	0.67957	0.637108	0.636648	0.580334	0.654521	0.641543	0.671215	0.677074	0.638904	0.646041	0.651016	0.614144	0.579212	0.576661	0.593412	0.574812	0.600229	0.570955	0.586823	0.5453
chr13:Cdkal1		1.48774	1.48774	1.48774	1.48774	1.48774	1.48774	1.42987	1.38558	1.38319	1.5	1.36549	1.36377	1.25222	1.02858	1.03949	0.951986	0.983244	0.68315	0.288501	-0.147021	-0.702423	-0.994192	-0.953746	-1.13904	-1.19717	-1.36109	-1.35054	-1.43755	-1.39198	-1.23539	-0.895507	-0.432279	-0.467989	-0.540414	-0.454532	-0.601175	-0.417144	-0.574054	-0.344896	-0.423301	-0.448949	-0.422297	-0.566454	-0.492461	-0.30075	-0.152924	0.0248272	-0.0722442
chr15:Zfr		1.48691	1.48691	1.48691	1.48691	1.48691	1.48691	1.5	1.5	1.5	1.5	1.5	1.5	1.46918	1.29785	1.41714	1.4397	1.36804	1.36418	1.28613	1.10916	1.05005	0.92991	0.84765	0.815979	0.795593	0.472235	0.451056	0.449306	0.364196	0.318251	0.380781	0.38388	0.39162	0.53078	0.655452	0.619438	0.660649	0.575149	0.621576	0.494695	0.529518	0.459102	0.430051	0.351474	0.245538	0.18486	0.157536	0.172501
chr11:Tanc2		1.4813	1.4813	1.4813	1.4813	1.4813	1.4813	1.5	1.5	1.5	1.5	1.5	1.5	1.5	1.46674	1.45453	1.46722	1.42133	1.29324	1.19621	1.11191	0.892691	0.756853	0.688137	0.587003	0.533452	0.545738	0.574847	0.458578	0.450196	0.385315	0.362327	0.374087	0.385583	0.42462	0.395945	0.423418	0.300134	0.232754	0.305379	0.271106	0.302621	0.26905	0.248477	0.21112	0.177317	0.202642	0.130371	0.0869146
chr3:H2afz		1.48043	1.48043	1.48043	1.48043	1.48043	1.48043	1.5	1.5	1.5	1.29953	1.28542	1.41485	1.15795	1.22509	0.963529	0.878001	0.667432	0.590207	0.628115	0.650472	0.989631	1.16476	1.29555	1.4747	1.40411	1.32991	1.26488	1.29645	1.13146	1.05715	0.988771	0.772532	0.513481	0.396605	0.160275	0.00713043	-0.104474	-0.215387	-0.377896	-0.479827	-0.554807	-0.743642	-0.842356	-0.742914	-0.831171	-0.678766	-0.477458	-0.384452
chr15:Enpp2		1.47961	1.47961	1.47961	1.47961	1.47961	1.47961	1.5	1.47397	1.37985	1.40045	1.4613	1.44553	1.48971	1.40789	1.35969	1.38709	1.32583	1.29463	1.22017	1.18146	1.10358	1.01073	1.00292	0.888892	0.873049	0.81113	0.723869	0.583317	0.471286	0.453684	0.397915	0.32286	0.336716	0.24827	0.222377	0.202818	0.13127	0.07061	0.114496	0.125984	-0.000578728	-0.00693594	-0.00136013	-0.0639769	-0.0888887	-0.0866702	-0.0965848	-0.0501869
chr1:Gigyf2		1.47902	1.47902	1.47902	1.47902	1.47902	1.47902	1.45719	1.5	1.5	1.5	1.5	1.5	1.43629	1.39784	1.42226	1.40289	1.12844	0.924158	0.750666	0.691266	0.540522	0.0873875	-0.046485	0.0846554	0.153513	-0.182684	-0.192643	-0.268286	-0.0728786	-0.097992	-0.0504158	-0.00961328	0.331666	0.22779	0.202871	0.204573	0.54671	0.300681	0.456223	0.404273	0.689113	0.479561	0.432999	0.499973	0.710125	0.739539	0.533347	0.334857
chr5:Atraid		1.47899	1.47899	1.47899	1.47899	1.47899	1.47899	1.46553	1.32952	1.31021	1.22612	1.21418	1.25958	1.16246	1.13139	0.794378	0.605765	0.737352	0.751143	0.677095	0.694014	0.663906	0.78639	0.868572	1.04676	0.974822	0.990048	0.941675	0.819514	0.806715	0.89666	0.954956	1.03364	0.850587	0.49207	0.370877	0.182044	0.243147	0.293921	0.334138	0.220061	0.170483	-0.0449536	-0.190763	-0.186244	-0.167371	-0.263151	-0.315073	-0.414095
chr4:Prkaa2		1.47823	1.47823	1.47823	1.47823	1.47823	1.47823	1.5	1.5	1.5	1.5	1.5	1.38469	1.43247	1.35009	1.33511	1.14865	1.1262	1.02339	0.943972	0.810166	0.661595	0.554161	0.544704	0.490486	0.390894	0.164672	0.334244	0.392769	0.424966	0.395681	0.445092	0.436108	0.567957	0.666948	0.581384	0.534793	0.819731	0.799001	0.659611	0.74236	0.66293	0.556069	0.649867	0.634432	0.693744	0.68442	0.801421	0.674988
chrX:Col4a5		1.47325	1.47325	1.47325	1.47325	1.47325	1.47325	1.5	1.5	1.5	1.5	1.5	1.5	1.5	1.5	1.27661	1.10064	1.03731	0.905386	0.716829	0.532219	0.376899	0.0494757	-0.120113	-0.343669	-0.492626	-0.490364	-0.576578	-0.658388	-0.723463	-0.724077	-0.764264	-0.533719	-0.332365	-0.214606	0.0399859	0.0909978	0.281739	0.323202	0.530933	0.710482	0.812087	0.98079	0.964067	1.04618	1.07214	0.896608	0.873298	0.67751
chr2:Plcb1		1.47097	1.47097	1.47097	1.47097	1.47097	1.47097	1.46154	1.5	1.5	1.5	1.5	1.5	1.5	1.5	1.5	1.43839	1.37204	1.31944	0.992288	0.827911	0.645371	0.485059	0.316449	0.164811	0.134033	-0.041531	0.00647021	-0.0380892	-0.06374	0.00285633	0.0910555	0.108023	0.19929	0.38842	0.50704	0.51999	0.607927	0.593832	0.645258	0.703986	0.785186	0.771348	0.868651	0.890321	0.790404	0.71881	0.875063	0.803729
chrX:Pcdh11x		1.4668	1.4668	1.4668	1.4668	1.4668	1.4668	1.5	1.41032	1.39277	1.43162	1.28931	1.29656	1.43463	1.41589	1.3499	1.18686	1.01732	0.76407	0.77781	0.643759	0.471331	0.418249	0.226679	-0.00624038	-0.0206166	-0.174976	-0.210168	-0.243471	-0.162472	-0.0526041	-0.0226817	0.133888	0.256927	0.387383	0.489998	0.61106	0.78192	0.92658	1.01261	1.11282	1.08731	1.14749	1.22685	1.19675	1.25735	1.26784	1.22804	1.0446
chr9:Myo9a		1.46327	1.46327	1.46327	1.46327	1.46327	1.46327	1.5	1.5	1.5	1.5	1.5	1.5	1.48694	1.5	1.29611	1.32981	1.13139	1.14605	1.18807	0.802004	0.815115	0.618933	0.438596	0.29537	-0.109266	-0.0114817	-0.114534	-0.059879	-0.106711	-0.249469	-0.0718434	-0.0979474	0.0186551	0.190707	0.29441	0.343332	0.35225	0.518413	0.573611	0.453104	0.480422	0.390823	0.417053	0.53698	0.710033	0.663565	0.826935	0.672971
chr5:Kctd8		1.46044	1.46044	1.46044	1.46044	1.46044	1.46044	1.45931	1.36164	1.27729	1.23863	1.22533	1.14222	1.14503	1.09931	1.06679	1.10065	1.10536	1.11216	1.1408	1.11673	1.05611	0.99672	1.01204	1.02242	1.04915	1.02893	0.986476	0.946777	0.982079	0.905654	0.890989	0.836701	0.851358	0.76131	0.709496	0.635082	0.556168	0.512259	0.522649	0.457744	0.447383	0.421207	0.453023	0.411513	0.480253	0.394387	0.376208	0.363842
chr11:Usp32		1.46021	1.46021	1.46021	1.46021	1.46021	1.46021	1.5	1.5	1.5	1.5	1.5	1.5	1.49961	1.35744	1.21687	1.27012	1.21531	1.0225	0.828573	0.663933	0.505897	0.267741	0.180385	0.269851	0.153497	0.098233	-0.0366095	-0.199889	-0.233266	-0.0838616	-0.175765	-0.158004	0.0379163	0.0667085	0.0771053	0.345951	0.369037	0.404913	0.723682	0.738735	0.69397	0.741212	0.763165	0.817185	0.9894	0.979928	0.817441	1.03666
chr9:Rbm6		1.45968	1.45968	1.45968	1.45968	1.45968	1.45968	1.5	1.5	1.5	1.48015	1.48921	1.36349	1.13738	1.05965	1.11403	1.11227	0.923856	0.498788	0.415995	0.375468	0.271971	0.197686	0.147891	-0.00896295	0.0392151	-0.000165231	-0.296963	-0.344571	-0.336879	-0.251474	-0.191623	-0.169779	-0.146386	-0.0400129	0.126302	0.154657	0.273831	0.3398	0.466809	0.571001	0.461771	0.478667	0.662568	0.607468	0.577191	0.637562	0.536649	0.428789
chr1:Pms1		1.45742	1.45742	1.45742	1.45742	1.45742	1.45742	1.5	1.45629	1.40635	1.39184	1.44798	1.41733	1.32494	1.32394	1.20556	1.0359	0.8578	0.739715	0.682227	0.596799	0.42865	0.225846	0.104754	0.062859	0.0277095	0.0734893	0.0554229	0.11633	0.188138	0.188787	0.232908	0.377182	0.459686	0.57729	0.567441	0.634803	0.680887	0.812313	0.810902	0.849367	0.891664	0.912696	0.962334	1.01333	1.15941	1.29156	1.27946	1.21461
chr5:Dmtf1		1.45252	1.45252	1.45252	1.45252	1.45252	1.45252	1.5	1.5	1.5	1.5	1.5	1.5	1.5	1.5	1.5	1.4586	1.2637	1.02414	0.876519	0.584682	0.361005	0.279791	0.240813	0.0471149	0.0941671	-0.0848673	-0.204831	-0.270396	-0.156888	-0.147368	-0.039945	0.0431151	0.196669	0.37551	0.377273	0.571073	0.640673	0.678645	0.910135	1.1109	1.2395	1.23477	1.21112	0.988258	0.933091	1.00172	0.869762	0.830067
chr2:Dennd1a		1.45064	1.45064	1.45064	1.45064	1.45064	1.45064	1.5	1.5	1.47655	1.5	1.5	1.5	1.4514	1.40016	1.45344	1.40353	1.3455	1.19248	1.0743	0.970582	0.72662	0.632503	0.545484	0.473225	0.419203	0.273247	0.173031	0.166141	0.180439	0.195702	0.194866	0.307756	0.361613	0.433088	0.497483	0.525575	0.578599	0.629145	0.682978	0.702233	0.771845	0.815854	0.80428	0.824774	0.830049	0.777287	0.750155	0.723516
chr7:Tnrc6a		1.44936	1.44936	1.44936	1.44936	1.44936	1.44936	1.5	1.4247	1.42885	1.44068	1.29934	1.25551	1.18664	1.20885	1.17138	1.04727	0.800748	0.694422	0.635427	0.410514	0.286103	0.272206	0.185655	0.052895	-0.0521607	-0.152299	-0.1999	-0.0978187	-0.160255	-0.156851	0.0314618	0.210613	0.177379	0.239229	0.472196	0.467556	0.486416	0.638261	0.633494	0.820666	1.09015	1.18289	1.13071	1.16354	1.1943	1.16991	1.11819	1.20023
chr15:Lrrk2		1.44712	1.44712	1.44712	1.44712	1.44712	1.44712	1.44999	1.4858	1.5	1.5	1.5	1.5	1.5	1.5	1.46148	1.41639	1.38854	1.24588	1.19478	1.05216	0.986847	0.747068	0.607018	0.565115	0.644361	0.587588	0.496351	0.331341	0.304128	0.245613	0.281564	0.194991	0.307696	0.311658	0.268198	0.265092	0.260843	0.256137	0.298664	0.398904	0.430748	0.463179	0.374115	0.286975	0.239725	0.0817136	0.036436	-0.110499
chr5:Gtf2i		1.44325	1.44325	1.44325	1.44325	1.44325	1.44325	1.35856	1.42311	1.4804	1.28029	1.19409	1.13104	1.06375	0.903071	0.787864	0.827702	0.709364	0.608592	0.535236	0.453668	0.371451	0.385089	0.429427	0.476577	0.486995	0.455766	0.416979	0.418374	0.513664	0.45421	0.40368	0.551144	0.462651	0.39735	0.336444	0.449317	0.473271	0.416036	0.490884	0.552265	0.66632	0.894723	0.862789	1.08679	1.10322	1.13942	1.07497	1.13395
chr16:Abcc5		1.44233	1.44233	1.44233	1.44233	1.44233	1.44233	1.43429	1.44854	1.32073	1.44645	1.43259	1.40914	1.49171	1.34611	1.23493	1.12289	1.1546	1.10336	1.0667	1.10269	0.936994	0.817609	0.724185	0.655705	0.661788	0.695963	0.646424	0.754311	0.777991	0.735719	0.591664	0.594173	0.522624	0.496663	0.406164	0.394412	0.375878	0.385432	0.319718	0.282161	0.334675	0.472174	0.415515	0.510561	0.494971	0.527386	0.496561	0.543071
chr12:Dpf3		1.44222	1.44222	1.44222	1.44222	1.44222	1.44222	1.40269	1.38116	1.2697	1.22724	1.30526	1.21475	1.26628	1.17193	1.21373	1.23964	1.25383	1.18497	1.2828	1.21533	1.14172	1.01605	0.885909	0.734293	0.709494	0.624697	0.596693	0.511204	0.528025	0.496409	0.538647	0.593916	0.588997	0.651318	0.694596	0.76536	0.7559	0.675022	0.721409	0.702683	0.680769	0.693458	0.69276	0.655382	0.767215	0.689842	0.635682	0.616588
chr5:Sppl3		1.44124	1.44124	1.44124	1.44124	1.44124	1.44124	1.40993	1.48973	1.5	1.48464	1.47838	1.44063	1.5	1.5	1.5	1.5	1.18195	1.23217	1.23335	1.1468	0.956525	0.733397	0.550306	0.248802	0.192483	0.139063	0.159657	0.216391	-0.00369414	-0.12621	-0.0733566	0.0721273	0.289346	0.313997	0.644683	0.532125	0.638016	0.675227	0.876342	0.979652	0.999975	0.937883	1.0517	0.935415	0.969545	0.762218	0.826297	0.695035
chr6:Ppp1r9a		1.44115	1.44115	1.44115	1.44115	1.44115	1.44115	1.36741	1.5	1.5	1.5	1.5	1.5	1.5	1.5	1.5	1.5	1.5	1.48179	1.22993	1.08838	0.908177	0.674554	0.362895	0.219194	-0.0109624	-0.107129	-0.204017	-0.112357	0.0444703	0.1514	0.0985671	0.131469	0.175772	0.384357	0.347963	0.465959	0.389957	0.356754	0.320994	0.270377	0.334908	0.484475	0.516133	0.552948	0.390208	0.538643	0.501663	0.473632
chr11:Gaa		1.43831	1.43831	1.43831	1.43831	1.43831	1.43831	1.39698	1.5	1.5	1.5	1.5	1.5	1.5	1.38359	1.27021	1.29303	1.2925	1.25308	0.93604	0.837862	0.767238	0.724365	0.562388	0.492062	0.588377	0.585783	0.564825	0.582232	0.583936	0.627652	0.646765	0.635806	0.609753	0.865563	0.776265	0.717635	0.751883	0.800776	0.712983	0.630685	0.649495	0.608851	0.494274	0.604171	0.420378	0.419513	0.445815	0.327318
chr9:Rbm5		1.43747	1.43747	1.43747	1.43747	1.43747	1.43747	1.44304	1.5	1.5	1.5	1.5	1.5	1.5	1.5	1.5	1.5	1.5	1.5	1.09583	0.691055	0.432917	0.396521	0.127367	-0.120436	-0.283578	-0.556576	-0.622557	-0.704165	-0.641126	-0.513405	-0.545041	-0.541627	-0.45907	-0.272448	-0.0823894	0.16919	0.235612	0.360485	0.28912	0.224071	0.454829	0.665598	0.718621	0.815631	0.775495	0.69267	0.639918	0.615257
chr10:Tet1		1.43657	1.43657	1.43657	1.43657	1.43657	1.43657	1.40618	1.47103	1.5	1.5	1.5	1.5	1.5	1.39666	1.41304	1.28494	1.16899	1.2421	1.22098	1.07156	0.7999	0.685107	0.600148	0.503083	0.533908	0.447014	0.376629	0.38525	0.261101	0.210472	0.16963	0.137929	0.254521	0.25561	0.283175	0.302651	0.382392	0.539051	0.528763	0.635087	0.616309	0.685262	0.787589	0.763182	0.821813	0.909089	0.925923	0.879799
chr18:Zeb1		1.43495	1.43495	1.43495	1.43495	1.43495	1.43495	1.4088	1.33572	1.3302	1.30065	1.31141	1.32851	1.29538	1.23106	1.29448	1.32309	1.36224	1.39566	1.06424	0.818098	0.588271	0.391445	0.0921823	-0.0364365	-0.0240728	-0.219322	-0.250457	-0.36085	-0.571704	-0.550753	-0.387757	-0.284951	-0.117398	0.00309222	-0.106887	-0.200879	-0.327782	-0.471489	-0.368294	-0.238849	-0.0862767	0.00313879	-0.0290097	-0.0636977	-0.0549582	0.193601	0.170608	0.338608
chr11:Taf15		1.4318	1.4318	1.4318	1.4318	1.4318	1.4318	1.34711	1.2383	1.16889	0.97336	1.09485	1.14057	1.16193	1.20775	1.10974	0.944603	0.748552	0.858779	0.940395	0.972586	0.899635	0.683999	0.401778	0.249983	0.0579354	-0.0186582	0.086545	0.0622454	0.0702995	0.127552	0.0662713	0.0755877	0.208738	0.43749	0.467305	0.651282	0.545278	0.564359	0.672886	0.748708	0.421417	0.3684	0.535484	0.470297	0.655723	0.899451	0.964755	1.28708
chr4:Sgip1		1.43078	1.43078	1.43078	1.43078	1.43078	1.43078	1.48899	1.5	1.47477	1.5	1.41335	1.39912	1.47364	1.24404	1.05022	0.92272	0.765972	0.603324	0.498328	0.388865	0.266191	0.167983	0.10573	-0.0381446	0.0302597	0.00761665	-0.00828715	-0.0244145	0.0432452	0.213795	0.294714	0.31556	0.420252	0.551447	0.630826	0.669026	0.785162	0.795124	0.853546	0.990223	0.951116	0.987614	0.973391	0.937002	0.85009	0.908099	0.856953	0.69714
chr5:Sorcs2		1.42862	1.42862	1.42862	1.42862	1.42862	1.42862	1.41016	1.42203	1.32701	1.33512	1.34711	1.17922	1.08356	1.1121	1.04169	0.933612	0.888554	0.792119	0.714315	0.696949	0.641294	0.632081	0.632581	0.641679	0.450441	0.491006	0.514397	0.535422	0.57884	0.675843	0.64046	0.685117	0.64138	0.647655	0.688739	0.743454	0.744973	0.80538	0.849851	0.901051	0.863722	0.87626	0.927513	0.999049	1.02281	1.00858	0.946025	0.931474
chr8:Vat1l		1.42834	1.42834	1.42834	1.42834	1.42834	1.42834	1.31669	1.22979	1.08692	1.15731	0.923676	0.830917	0.737112	0.700883	0.625312	0.576376	0.715938	0.605795	0.49449	0.460819	0.26938	0.326565	0.457304	0.614116	0.55481	0.550598	0.615655	0.429155	0.51483	0.650829	0.590303	0.744702	0.828002	0.667642	0.554969	0.507407	0.430823	0.223825	0.255981	0.336605	0.213852	0.045482	-0.138691	-0.390703	-0.218931	-0.262661	-0.077713	-0.107958
chr4:Hnrnpr		1.42802	1.42802	1.42802	1.42802	1.42802	1.42802	1.5	1.5	1.5	1.5	1.5	1.5	1.5	1.5	1.5	1.5	1.48356	1.17319	0.933379	0.770852	0.603459	0.478644	0.252056	0.0632936	-0.0433961	-0.127768	-0.25697	-0.140225	-0.427675	-0.480601	-0.54199	-0.438808	-0.479542	-0.390135	-0.296676	-0.199803	-0.21098	0.0023639	0.0478798	0.126027	0.146116	0.149009	-0.0161635	-0.0327598	-0.0610058	-0.0870904	-0.250883	-0.189117
chr4:Pappa		1.42497	1.42497	1.42497	1.42497	1.42497	1.42497	1.5	1.48067	1.4732	1.35713	1.31191	1.06682	1.07245	1.0262	0.892877	0.994157	1.0701	0.923379	0.957845	0.841689	0.980886	0.920153	1.00579	0.916022	1.05898	1.11545	1.06342	0.934366	0.911029	0.901264	0.8954	0.771016	0.83178	0.853281	0.868117	0.676764	0.590947	0.573175	0.617314	0.70753	0.681514	0.696108	0.670115	0.552175	0.444399	0.446751	0.275094	0.300748
chr1:Ncoa2		1.42151	1.42151	1.42151	1.42151	1.42151	1.42151	1.5	1.49713	1.5	1.5	1.5	1.5	1.5	1.5	1.5	1.35297	1.30448	1.21864	0.976294	0.796302	0.699474	0.462658	0.217239	0.0465294	0.175861	0.158377	0.110906	0.107812	-0.000430461	0.107371	0.0328198	0.163189	0.388364	0.669452	0.869889	0.855834	0.837243	0.874669	0.792582	0.942555	0.869759	0.900318	0.92941	0.689365	0.671184	0.584432	0.449991	0.473375
chr11:Ccdc88a		1.41932	1.41932	1.41932	1.41932	1.41932	1.41932	1.30894	1.25382	1.21057	1.18751	1.23059	1.25949	1.32355	1.42121	1.45177	1.3158	1.1262	1.07799	1.01496	0.876964	0.801955	0.586159	0.459909	0.334085	0.110683	-0.127618	-0.129526	-0.0740141	-0.0188919	0.000882245	-0.0102759	0.00533456	0.138814	0.279398	0.387845	0.547907	0.725003	0.802399	0.962154	1.04512	1.08488	1.19399	1.20437	1.14677	1.16248	1.04888	0.973402	1.00837
chr2:Mpped2		1.41835	1.41835	1.41835	1.41835	1.41835	1.41835	1.33872	1.48497	1.48303	1.5	1.5	1.36822	1.06218	1.20392	1.21264	0.979608	0.97768	0.977891	0.978367	0.888497	0.775399	0.723909	0.738585	0.886848	0.833351	0.799172	0.883364	0.912679	0.944212	0.771901	0.933785	0.833174	0.946823	0.815354	0.799295	0.794801	0.646244	0.528834	0.607115	0.511857	0.55934	0.481348	0.419444	0.307541	0.367733	0.411382	0.454783	0.537942
chr1:Akt3		1.41811	1.41811	1.41811	1.41811	1.41811	1.41811	1.5	1.5	1.5	1.5	1.5	1.5	1.40101	1.45019	1.29333	1.19517	1.05665	0.765709	0.445079	0.18041	-0.103932	-0.254696	-0.440086	-0.580576	-0.774004	-0.840705	-0.888697	-0.741178	-0.627506	-0.456426	-0.414037	-0.188765	-0.112136	-0.119433	-0.0291504	0.009872	0.269626	0.318572	0.288365	0.388605	0.369678	0.163167	0.25273	0.309922	0.582214	0.462091	0.752591	0.490902
chr14:Spcs1		1.41683	1.41683	1.41683	1.41683	1.41683	1.41683	1.28326	1.29491	1.17196	1.20208	1.13414	1.20424	1.04729	1.18033	1.19522	1.16759	1.2414	1.37383	1.26104	1.29696	1.28204	1.23777	1.18781	1.26779	1.18	1.3007	1.19805	1.03775	0.892465	0.974283	0.843189	0.853686	0.807643	0.723576	0.714229	0.554366	0.363985	0.315249	0.35368	0.219276	0.133631	0.0401726	-0.0731693	-0.145473	-0.172646	-0.0905319	-0.103409	0.0158521
chr1:Syt14		1.41663	1.41663	1.41663	1.41663	1.41663	1.41663	1.36031	1.21241	1.20409	1.08403	1.08616	0.970489	0.927075	0.930681	0.869248	0.799093	0.61975	0.661863	0.683596	0.58454	0.5435	0.439552	0.401708	0.355225	0.312984	0.293513	0.271487	0.231125	0.266472	0.234703	0.219559	0.265743	0.393733	0.37124	0.28756	0.280697	0.349288	0.322579	0.342377	0.351571	0.394798	0.431336	0.484197	0.391896	0.462261	0.543861	0.581099	0.511825
chr14:Ints6		1.41662	1.41662	1.41662	1.41662	1.41662	1.41662	1.5	1.5	1.5	1.5	1.5	1.5	1.5	1.5	1.5	1.37018	0.999285	0.908109	0.763312	0.640534	0.555354	0.464392	0.0482843	-0.134309	-0.447787	-0.509692	-0.49339	-0.351895	-0.306362	-0.181019	0.0222103	0.00181904	0.0133021	0.411287	0.620174	0.909259	0.90842	0.910085	0.917072	1.05866	1.04974	0.911896	1.17945	1.18251	1.00232	0.835838	0.656311	0.775676
chr5:Jakmip1		1.41517	1.41517	1.41517	1.41517	1.41517	1.41517	1.36938	1.30171	1.29792	1.30946	1.27363	1.23887	1.27367	1.19023	1.19505	1.19774	1.19788	1.18311	1.15187	1.04531	0.987475	0.922476	0.85499	0.76963	0.804013	0.724186	0.696348	0.679959	0.718027	0.697356	0.667142	0.596615	0.633166	0.677988	0.677664	0.641303	0.650128	0.689393	0.695106	0.62966	0.608018	0.624625	0.689753	0.631864	0.573763	0.524713	0.537098	0.562063
chr10:Sobp		1.4151	1.4151	1.4151	1.4151	1.4151	1.4151	1.5	1.37231	1.4471	1.46049	1.5	1.37835	1.38314	1.25837	1.26193	1.21085	1.2577	1.06923	1.1822	1.00742	0.88573	0.710175	0.728272	0.666543	0.641794	0.559564	0.528403	0.619038	0.655651	0.402917	0.400822	0.420804	0.426264	0.478697	0.451941	0.466643	0.52685	0.652897	0.626098	0.564238	0.653797	0.72496	0.730912	0.692961	0.692096	0.707273	0.728172	0.711773
chr5:N4bp2		1.40534	1.40534	1.40534	1.40534	1.40534	1.40534	1.43634	1.37084	1.33016	1.32882	1.26513	1.30362	1.40698	1.42499	1.35445	1.22248	1.24699	1.14442	1.0825	1.02145	1.0031	0.971175	0.845857	0.649408	0.573727	0.573607	0.566838	0.489808	0.502583	0.55752	0.581087	0.559398	0.551698	0.561393	0.630618	0.644749	0.662601	0.684588	0.717277	0.739483	0.602422	0.657113	0.680114	0.713435	0.748522	0.695066	0.676763	0.656155
chr18:Wac		1.40314	1.40314	1.40314	1.40314	1.40314	1.40314	1.5	1.5	1.5	1.5	1.5	1.5	1.5	1.5	1.5	1.34362	1.5	1.22351	1.12665	1.0816	0.836063	0.592829	0.128448	0.0789921	0.134083	0.0510739	0.0402722	-0.205704	-0.404161	-0.39531	-0.517489	-0.405195	-0.20664	0.111376	-0.0663638	-0.312274	-0.438994	-0.296858	-0.0899761	-0.0155148	0.277732	0.399926	0.295653	0.156498	0.047522	0.423606	0.651641	0.869815
chr13:Nsd1		1.40289	1.40289	1.40289	1.40289	1.40289	1.40289	1.48473	1.5	1.5	1.5	1.28816	1.26706	0.961379	1.00242	1.01644	0.929981	1.00316	0.834971	0.678336	0.311227	0.197289	0.253751	-0.116575	-0.0687854	-0.31597	-0.467424	-0.453083	-0.649045	-0.585518	-0.767907	-0.488295	-0.382376	-0.367363	-0.214375	-0.0519185	0.0268291	0.189455	0.0935806	0.102303	0.160373	0.267142	0.217503	0.166791	-0.0298715	-0.0412161	-0.0636628	-0.0205847	-0.338656
chr14:Vdac2		1.40175	1.40175	1.40175	1.40175	1.40175	1.40175	1.40623	1.41127	1.09261	1.11974	1.13959	1.02229	1.01336	0.953813	0.700635	0.652511	0.634473	0.674004	0.654802	0.888516	0.813526	1.04467	1.37528	1.37514	1.45448	1.5	1.5	1.5	1.34643	1.44112	1.42356	1.48336	1.23043	0.692884	0.603726	0.314668	0.202807	0.0404401	-0.124422	-0.350014	-0.594716	-0.661226	-0.676419	-0.952425	-0.817629	-0.828326	-0.837077	-0.781877
chr7:Fchsd2		1.40119	1.40119	1.40119	1.40119	1.40119	1.40119	1.5	1.5	1.5	1.5	1.5	1.5	1.5	1.5	1.5	1.5	1.37378	1.25444	1.20339	1.08501	0.897635	0.800599	0.689235	0.56311	0.320802	0.250295	0.239275	0.182633	0.156078	0.103777	0.117883	0.108709	0.0955225	0.0909348	0.285612	0.387741	0.352985	0.354388	0.583805	0.603046	0.615416	0.601756	0.685091	0.666934	0.574257	0.43325	0.491341	0.430667
chr16:Itsn1		1.3991	1.3991	1.3991	1.3991	1.3991	1.3991	1.38183	1.41911	1.46492	1.43321	1.46207	1.5	1.49256	1.41299	1.41597	1.28172	1.2642	1.21459	1.07291	0.888608	0.800743	0.717121	0.55633	0.516782	0.436912	0.266286	0.201251	0.0492454	0.0599854	0.0898865	0.0915884	0.243316	0.272711	0.31583	0.302953	0.43515	0.512551	0.637777	0.794377	0.767677	0.815058	0.954846	0.994406	1.02124	1.01582	1.04268	0.979951	0.947964
chr3:Jtb		1.39762	1.39762	1.39762	1.39762	1.39762	1.39762	1.25568	1.23314	1.27122	1.28986	1.19272	1.23725	1.26087	1.21412	1.10295	1.12697	1.07267	1.1468	1.20425	1.09051	1.09775	1.1506	1.22208	1.21062	1.18949	1.16704	1.2247	1.26703	1.23041	1.18484	1.23046	1.25604	1.10157	0.8851	0.785039	0.63675	0.582223	0.434181	0.20212	0.229918	0.129656	0.0812789	-0.0537474	-0.0709371	-0.130371	-0.157406	-0.0800152	-0.113573
chr4:Ube4b		1.39745	1.39745	1.39745	1.39745	1.39745	1.39745	1.31061	1.31223	1.30322	1.37384	1.27527	1.10678	1.12477	0.991871	0.901327	0.940963	0.959413	1.01168	0.973587	0.987452	1.05523	1.03291	1.05179	1.03957	1.13615	1.1419	1.12194	1.03519	1.02526	1.1257	1.04644	0.827493	0.908995	0.928994	0.921522	0.827428	0.872174	0.905123	0.851135	0.727574	0.505637	0.475645	0.520692	0.381962	0.283856	0.319129	0.315818	0.146091
chrX:Araf		1.39564	1.39564	1.39564	1.39564	1.39564	1.39564	1.33548	1.24457	1.2156	1.09449	0.988112	0.980223	0.989228	1.05047	1.19026	1.0484	1.14504	0.955615	1.10434	0.968187	1.17473	1.24352	1.18671	1.11054	0.842283	0.887622	0.721508	0.60439	0.763638	0.680122	0.694561	0.584766	0.502286	0.411555	0.326464	0.61578	0.558927	0.735919	0.872989	0.918474	0.82554	0.822552	0.701922	0.647973	0.634863	0.822484	0.784073	0.788035
chr6:Itpr2		1.39514	1.39514	1.39514	1.39514	1.39514	1.39514	1.5	1.37948	1.31254	1.25925	1.3107	1.31834	1.43609	1.5	1.48116	1.29368	1.12314	0.914486	0.947314	0.766719	0.69031	0.462065	0.461466	0.129074	-0.132754	-0.192786	-0.0900951	-0.0826632	-0.0514248	-0.143224	-0.114824	-0.117622	-0.0751027	-0.103415	0.150936	0.32372	0.359564	0.435014	0.504933	0.57735	0.754833	0.92849	1.17133	1.24887	1.33206	1.25262	1.21404	1.13395
chr19:Pip5k1b		1.39465	1.39465	1.39465	1.39465	1.39465	1.39465	1.42625	1.47086	1.41287	1.46036	1.37396	1.39542	1.39042	1.35334	1.36519	1.25709	1.22066	1.23917	1.05958	0.85399	0.719647	0.62963	0.573801	0.541931	0.451001	0.459485	0.473235	0.421388	0.286397	0.306646	0.39261	0.513389	0.604647	0.645104	0.702999	0.697098	0.623342	0.61303	0.622558	0.654839	0.634435	0.65345	0.675714	0.67408	0.642613	0.561965	0.606013	0.544672
chr4:Dab1		1.39365	1.39365	1.39365	1.39365	1.39365	1.39365	1.34533	1.28564	1.22673	1.16894	1.1583	1.06617	1.10829	1.08955	1.02422	0.945943	0.896105	0.879013	0.867828	0.896949	0.888252	0.863096	0.826327	0.726734	0.690279	0.744292	0.737779	0.787549	0.839906	0.873812	0.830161	0.76097	0.757511	0.782028	0.81525	0.783673	0.721918	0.706362	0.694469	0.610305	0.580867	0.64142	0.717027	0.779723	0.751431	0.741864	0.732238	0.731131
chr17:Pla2g7		1.39252	1.39252	1.39252	1.39252	1.39252	1.39252	1.49898	1.5	1.5	1.5	1.5	1.5	1.5	1.5	1.5	1.5	1.5	1.33442	1.11291	0.993806	0.727807	0.545099	0.443858	0.300142	0.177469	-0.0190981	-0.175293	-0.231965	-0.2551	-0.193371	-0.0319765	0.139037	0.216744	0.288872	0.350778	0.462307	0.610495	0.681648	0.801545	0.825973	0.898052	0.876329	0.775231	0.705694	0.686104	0.597392	0.527442	0.477771
chr12:Gphn		1.39034	1.39034	1.39034	1.39034	1.39034	1.39034	1.19414	1.15087	1.11286	1.19826	1.00008	0.880584	0.853001	0.824507	0.898399	0.894699	0.833241	0.742234	0.618044	0.507527	0.289887	0.149655	0.0865631	-0.10439	-0.15164	-0.271003	-0.36946	-0.460523	-0.396889	-0.277317	-0.329014	-0.210713	-0.0453521	0.148099	0.251853	0.194628	0.240531	0.185111	0.313395	0.369261	0.365215	0.501078	0.515655	0.603659	0.511825	0.697211	0.744939	0.645254
chr11:Fstl4		1.38902	1.38902	1.38902	1.38902	1.38902	1.38902	1.41644	1.42004	1.30952	1.25957	1.27753	1.25963	1.20265	1.12745	1.28001	1.28113	1.27485	1.20822	1.17633	1.19073	1.15811	1.04324	0.963391	1.00216	1.00372	0.839455	0.797945	0.785965	0.800901	0.713791	0.637073	0.623643	0.56569	0.627198	0.42562	0.363247	0.381364	0.368587	0.330816	0.307255	0.382546	0.488932	0.494047	0.58598	0.557417	0.602894	0.55255	0.534104
chr2:Odf2		1.38688	1.38688	1.38688	1.38688	1.38688	1.38688	1.15997	1.10606	0.99226	1.33849	1.39088	1.5	1.5	1.5	1.5	1.5	1.5	1.5	1.5	1.37235	0.936572	0.680304	0.528844	0.318431	0.0447503	0.00631087	-0.103154	-0.22337	-0.312874	-0.316878	-0.108439	-0.0832318	0.0677995	-0.013758	0.144523	0.197647	0.278087	0.196967	0.499531	0.512623	0.664581	0.765299	0.874247	0.941889	1.12549	1.06831	1.09177	1.02739
chr8:Insr		1.38681	1.38681	1.38681	1.38681	1.38681	1.38681	1.46346	1.28804	1.5	1.5	1.5	1.5	1.5	1.5	1.3405	1.0267	0.812964	0.610798	0.564993	0.277374	0.168029	-0.34118	-0.569387	-0.62969	-0.933099	-1.00546	-0.975898	-1.02054	-0.92309	-0.880788	-0.742355	-0.580546	-0.348905	0.145495	0.162328	0.303597	0.540088	0.7454	0.747838	0.93125	1.16729	1.23687	1.16447	1.40319	1.10516	1.29427	1.33233	1.38248
chr10:Ppp1r12a		1.38127	1.38127	1.38127	1.38127	1.38127	1.38127	1.36726	1.5	1.5	1.5	1.5	1.5	1.34011	1.38737	1.27089	1.13875	0.881135	0.841017	0.793095	0.58788	0.365956	-0.128875	-0.285483	-0.217229	-0.307691	-0.393212	-0.497665	-0.377323	-0.515515	-0.572855	-0.509215	-0.514751	-0.380718	-0.146831	-0.149867	0.0579599	0.379286	0.473386	0.504934	0.639269	0.716065	0.843971	0.940899	0.960202	1.11057	1.36949	1.35882	1.12856
chr10:Plekhg1		1.3771	1.3771	1.3771	1.3771	1.3771	1.3771	1.32059	1.32745	1.33672	1.34482	1.27614	1.26245	1.28116	1.23637	1.25272	1.2815	1.27788	1.24871	1.17709	1.09257	0.934545	0.78695	0.701148	0.53171	0.487184	0.322799	0.156037	0.0771701	-0.00622445	-0.0241142	-0.00860319	0.14733	0.180971	0.299687	0.391347	0.381366	0.356154	0.430024	0.595137	0.808856	0.923903	0.944829	0.907986	1.08433	1.00422	1.01712	0.99289	1.02493
chr2:4930402H24Rik		1.37582	1.37582	1.37582	1.37582	1.37582	1.37582	1.36255	1.3751	1.31652	1.30867	1.31859	1.26874	1.30358	1.27744	1.27353	1.22585	1.18329	1.13991	0.998389	0.918096	0.839859	0.717038	0.688664	0.630703	0.607137	0.548385	0.485265	0.438732	0.425602	0.462249	0.509766	0.495213	0.560612	0.544599	0.535776	0.553978	0.595779	0.661855	0.716605	0.755766	0.764677	0.730026	0.816413	0.820561	0.877847	0.862768	0.803905	0.736405
chr14:Dock9		1.37449	1.37449	1.37449	1.37449	1.37449	1.37449	1.39817	1.32724	1.30602	1.39717	1.38141	1.34486	1.31751	1.23881	1.1249	1.05097	1.05926	0.999691	1.0326	1.03375	0.911369	0.803328	0.738749	0.735695	0.770733	0.653377	0.688614	0.620832	0.5996	0.633178	0.55195	0.53543	0.561585	0.608656	0.551479	0.547753	0.603576	0.539272	0.558304	0.562075	0.55138	0.590206	0.522027	0.529253	0.469786	0.598728	0.604257	0.536563
chr9:Elmod1		1.37303	1.37303	1.37303	1.37303	1.37303	1.37303	1.4244	1.47492	1.46701	1.41475	1.42934	1.4561	1.5	1.44701	1.2833	1.40394	1.388	1.33429	1.21047	1.11867	1.03738	0.842863	0.69039	0.478893	0.381489	0.372095	0.234486	0.0685547	-0.0112016	-0.00454195	-0.0149133	-0.012968	0.00352976	0.0690191	0.088243	0.070866	0.0996195	0.150522	0.182748	0.223623	0.145736	0.103934	0.071411	0.0970147	0.0421121	-0.0575528	0.0293777	0.0677926
chr3:Rnpc3		1.37298	1.37298	1.37298	1.37298	1.37298	1.37298	1.46823	1.38289	1.3898	1.48636	1.5	1.5	1.5	1.47778	1.38571	1.39624	1.25659	1.17527	1.18714	1.02606	0.886182	0.64019	0.494882	0.35731	0.321475	0.202969	0.159747	0.171789	0.168838	0.0837733	0.0927421	0.108822	0.203037	0.300092	0.435202	0.601853	0.710923	0.768969	0.852913	0.940696	1.00745	1.16357	1.14742	1.09587	1.10266	1.02444	0.856493	0.777916
chr4:Gm12353		1.3663	1.3663	1.3663	1.3663	1.3663	1.3663	1.42534	1.44871	1.47201	1.40903	1.5	1.5	1.5	1.5	1.4795	1.38703	1.30244	1.20311	1.16826	1.07255	0.899978	0.593761	0.534174	0.452095	0.444624	0.401003	0.337674	0.294106	0.36701	0.342032	0.29487	0.450153	0.647998	0.629689	0.616314	0.576479	0.618233	0.754881	0.823113	0.775077	0.783772	0.731488	0.677904	0.73528	0.799709	0.843267	0.804801	0.703204
chr15:Cdh12		1.36484	1.36484	1.36484	1.36484	1.36484	1.36484	1.32083	1.29646	1.30146	1.38935	1.36075	1.22379	1.12426	1.20929	1.18289	1.10066	1.05711	1.0576	1.17149	1.12336	1.02754	0.945225	0.946444	0.917159	0.853532	0.797882	0.882924	0.845505	0.770105	0.678423	0.642905	0.544508	0.548942	0.55378	0.60052	0.515069	0.516532	0.407644	0.511415	0.559268	0.497941	0.54469	0.603818	0.547083	0.546061	0.486262	0.535381	0.660436
chr11:Abca5		1.36465	1.36465	1.36465	1.36465	1.36465	1.36465	1.4303	1.42035	1.44245	1.41103	1.43482	1.39138	1.2914	1.30464	1.43615	1.43417	1.45267	1.42727	1.31847	1.06482	0.907997	0.783011	0.590914	0.547817	0.407776	0.246942	0.113614	0.0685901	0.0211192	0.118367	0.275497	0.420734	0.499838	0.519772	0.650597	0.783318	0.845324	0.866843	0.912054	0.943561	0.941084	0.845372	0.8188	0.756359	0.891204	0.768101	0.65803	0.631954
chr2:Mllt10		1.36352	1.36352	1.36352	1.36352	1.36352	1.36352	1.43958	1.2551	1.27859	1.42969	1.5	1.45781	1.5	1.47394	1.43218	1.34036	1.17403	1.09872	1.11219	0.898578	0.821857	0.47991	0.180012	-0.0718245	-0.317624	-0.539775	-0.625258	-0.618589	-0.619059	-0.617563	-0.647242	-0.588409	-0.260531	-0.0592752	0.0970672	0.307254	0.54963	0.774692	0.898129	0.993007	1.03304	1.10135	1.0829	0.939791	1.02952	1.11879	1.02557	0.857637
chr1:Suco		1.363	1.363	1.363	1.363	1.363	1.363	1.3651	1.39386	1.44056	1.45486	1.47009	1.42386	1.35756	1.31732	1.26299	1.2612	1.24373	1.21126	1.0763	0.925587	0.819931	0.656771	0.503545	0.412051	0.398428	0.267093	0.163286	0.0242203	-0.00839349	0.0126755	0.113966	0.160809	0.259869	0.370895	0.43862	0.49857	0.650212	0.749561	0.908708	0.941695	0.981511	0.809934	0.861703	0.791177	0.849886	0.922559	0.770707	0.733922
chr13:Lrrc16a		1.36181	1.36181	1.36181	1.36181	1.36181	1.36181	1.36373	1.30448	1.22067	1.20059	1.02562	0.992412	0.960848	0.949749	0.904326	0.93168	0.961021	0.904878	0.912742	0.934538	0.997824	1.09719	0.998981	0.962478	0.979544	1.03563	0.967859	0.971031	0.9852	0.948805	0.893994	0.823788	0.840232	0.831235	0.825895	0.75878	0.664119	0.736262	0.706335	0.640546	0.652825	0.649912	0.615055	0.565752	0.587587	0.572557	0.652155	0.651937
chr17:Dlgap1		1.35889	1.35889	1.35889	1.35889	1.35889	1.35889	1.30071	1.30553	1.18088	1.22752	1.22936	1.21156	1.20272	1.06514	1.12223	1.09718	1.06512	1.1235	1.06805	0.97737	0.893198	0.838753	0.784703	0.734416	0.730377	0.671653	0.644594	0.623152	0.635574	0.603199	0.623988	0.606432	0.621518	0.656201	0.635808	0.678706	0.77211	0.787685	0.807906	0.773594	0.76622	0.740295	0.760176	0.708135	0.692949	0.700438	0.633785	0.574233
chr5:Pds5a		1.35855	1.35855	1.35855	1.35855	1.35855	1.35855	1.35968	1.44309	1.2901	1.36785	1.31588	1.3629	1.42363	1.27819	1.20872	1.1744	1.09913	0.912093	0.878038	0.913213	0.618234	0.592156	0.486887	0.375785	0.410882	0.241594	0.389895	0.363805	0.548476	0.465936	0.473907	0.715302	0.579326	0.513888	0.602153	0.609942	0.762934	0.610548	0.639242	0.616744	0.756405	0.827554	0.706359	0.95424	1.13028	1.05561	0.982919	0.95135
chr9:Sltm		1.35725	1.35725	1.35725	1.35725	1.35725	1.35725	1.10608	1.06633	1.17917	1.0383	0.829506	0.846809	0.833495	0.881296	0.970235	0.951703	0.704311	0.645409	0.578633	0.447021	0.531967	0.430416	0.0752308	-0.0379621	-0.159842	-0.303922	-0.421282	-0.659821	-0.576171	-0.485018	-0.423325	-0.467552	-0.236705	0.0498084	0.282902	0.306864	0.437606	0.632132	0.972658	1.01406	0.952567	0.965168	0.968296	0.992961	0.818333	0.444319	0.394113	0.388931
chr10:Cdk17		1.35626	1.35626	1.35626	1.35626	1.35626	1.35626	1.3308	1.28808	1.28941	1.20557	1.09152	1.14621	1.15346	1.11129	1.10744	1.01671	0.953021	0.925035	0.896961	0.822603	0.830059	0.71165	0.681057	0.628804	0.458701	0.452103	0.537867	0.550595	0.583856	0.594681	0.556737	0.517575	0.627457	0.574384	0.635724	0.712745	0.653087	0.51296	0.446147	0.391378	0.33142	0.329414	0.310006	0.221793	0.24332	0.194808	0.197135	0.256626
chr19:Rorb		1.35588	1.35588	1.35588	1.35588	1.35588	1.35588	1.38942	1.36741	1.38379	1.41938	1.48055	1.496	1.47467	1.45395	1.41769	1.37516	1.3233	1.2549	1.18703	1.09552	0.964272	0.811783	0.701053	0.648331	0.565587	0.497197	0.455241	0.39274	0.412826	0.448186	0.406735	0.410617	0.440555	0.482532	0.519225	0.587649	0.628719	0.619016	0.673438	0.690284	0.629823	0.651003	0.67697	0.671602	0.64217	0.616148	0.568932	0.582457
chrX:Clcn5		1.3535	1.3535	1.3535	1.3535	1.3535	1.3535	1.45953	1.45343	1.5	1.5	1.5	1.34297	1.32503	1.28453	1.21794	1.34552	1.21371	1.0341	0.95017	0.815074	0.721149	0.61592	0.604548	0.546995	0.398655	0.407135	0.392043	0.419069	0.359462	0.347318	0.330455	0.421613	0.48428	0.511958	0.598823	0.722741	0.751454	0.677481	0.759566	0.870971	0.913133	0.989712	1.00447	0.973068	0.973942	0.902599	0.845356	0.81591
chr14:Zmym2		1.35142	1.35142	1.35142	1.35142	1.35142	1.35142	1.42016	1.32341	1.45044	1.37018	1.42568	1.43098	1.42914	1.5	1.49676	1.48949	1.24015	1.11962	1.0745	0.946792	0.850739	0.686121	0.690665	0.694907	0.525593	0.461364	0.369609	0.395079	0.411936	0.377536	0.418674	0.484497	0.566188	0.55826	0.429971	0.422372	0.396014	0.459219	0.447215	0.532751	0.673798	0.601376	0.546688	0.534022	0.634526	0.691924	0.668576	0.862755
chr11:Ksr1		1.35093	1.35093	1.35093	1.35093	1.35093	1.35093	1.39351	1.26151	1.20581	1.10765	1.12021	1.11803	0.922031	0.885999	0.932539	0.971452	0.813451	0.728369	0.735275	0.659246	0.69974	0.457878	0.45287	0.439069	0.401723	0.403193	0.37657	0.457874	0.39756	0.402364	0.39649	0.374997	0.502927	0.52755	0.59675	0.678715	0.646481	0.564017	0.556227	0.640553	0.750975	0.803084	0.814151	0.832459	0.734704	0.642123	0.625504	0.552962
chr2:Baz2b		1.35074	1.35074	1.35074	1.35074	1.35074	1.35074	1.4377	1.4095	1.43966	1.5	1.5	1.5	1.5	1.5	1.5	1.5	1.5	1.43648	1.38603	1.14933	1.02901	0.883288	0.662961	0.527895	0.421259	0.358136	0.290514	0.221945	0.266817	0.246097	0.300255	0.316866	0.350246	0.372762	0.428783	0.474192	0.510843	0.547881	0.589704	0.585427	0.613364	0.683203	0.722658	0.683089	0.778394	0.717729	0.617244	0.605542
chr7:Copb1		1.3489	1.3489	1.3489	1.3489	1.3489	1.3489	1.5	1.5	1.41754	1.20118	1.19629	1.00998	1.10701	1.11681	1.11081	1.18001	1.20191	1.07186	1.0256	0.951461	0.920812	0.8026	0.674219	0.598285	0.592749	0.561088	0.794149	0.690994	0.396693	0.380249	0.530323	0.602331	0.69521	0.941589	0.944991	0.947428	0.977549	0.66486	0.918164	1.03086	0.950332	0.907475	1.0009	0.863331	0.695912	0.737014	0.683434	0.65251
chr16:Igsf11		1.34802	1.34802	1.34802	1.34802	1.34802	1.34802	1.37544	1.35452	1.38959	1.4503	1.4243	1.44847	1.4002	1.41081	1.39978	1.37957	1.3109	1.26898	1.19838	1.07848	0.903758	0.85406	0.731871	0.665846	0.557634	0.46356	0.39653	0.359564	0.299347	0.32063	0.346392	0.391761	0.448569	0.493861	0.514574	0.553765	0.56488	0.590645	0.672208	0.756292	0.793024	0.765612	0.839944	0.779692	0.756458	0.766561	0.766487	0.812046
chr12:Pdia6		1.34486	1.34486	1.34486	1.34486	1.34486	1.34486	1.22126	1.16908	1.18504	1.23907	1.31436	1.34286	1.36793	1.36731	1.36321	1.39067	1.35807	1.49693	1.29133	1.36348	1.26431	1.08889	1.04772	1.02101	0.934176	0.907717	0.706638	0.568425	0.550275	0.587332	0.53119	0.547754	0.582124	0.419805	0.372403	0.503828	0.52482	0.634379	0.613094	0.608419	0.646854	0.611468	0.541295	0.359445	0.486419	0.478261	0.270928	0.236237
chr13:Stard3nl		1.34482	1.34482	1.34482	1.34482	1.34482	1.34482	1.29121	1.22398	1.21709	1.26438	1.29997	1.26383	1.17851	1.28661	1.3638	1.16688	1.00216	1.16404	1.18788	1.2136	1.1477	1.09578	1.07651	1.11926	1.01048	0.755215	0.708255	0.773937	0.709499	0.750208	0.718104	0.71337	0.746047	0.699833	0.613141	0.67234	0.864622	0.912294	0.821473	0.693337	0.603132	0.601784	0.563569	0.503892	0.441247	0.464646	0.43276	0.269964
chr12:Dnmt3a		1.34337	1.34337	1.34337	1.34337	1.34337	1.34337	1.37891	1.34875	1.42081	1.37755	1.36823	1.35799	1.34776	1.28163	1.19056	1.09642	1.04037	1.00248	0.912259	0.724448	0.685118	0.607594	0.519142	0.459785	0.444152	0.435742	0.397741	0.349733	0.282747	0.323352	0.400039	0.451103	0.488802	0.507392	0.51714	0.552757	0.717474	0.736737	0.780387	0.774279	0.865673	0.909362	0.920175	0.999492	1.08892	1.0714	1.07042	0.900495
chr4:Zcchc11		1.34259	1.34259	1.34259	1.34259	1.34259	1.34259	1.38047	1.49699	1.39356	1.13592	1.13195	1.27687	1.25646	1.40545	1.36132	1.25671	1.36855	1.25905	1.10862	1.06166	1.11803	0.815634	0.47255	0.323293	0.049449	-0.00810929	0.016594	-0.254845	-0.282979	-0.247871	-0.219305	-0.243967	0.124845	0.257605	0.403152	0.592794	0.628858	0.588719	0.934929	0.911051	0.888057	0.946116	1.01232	0.690708	0.618212	0.511288	0.339701	0.233675
chr19:Exoc6		1.34114	1.34114	1.34114	1.34114	1.34114	1.34114	1.379	1.32921	1.41755	1.48322	1.44955	1.5	1.41273	1.18506	1.21227	1.12463	1.03198	0.984799	0.935908	0.749464	0.649329	0.71459	0.576225	0.768637	0.748987	0.769031	0.71255	0.742978	0.679109	0.623832	0.604952	0.432155	0.550905	0.712813	0.630622	0.661981	0.735519	0.859314	0.847932	0.711458	0.865548	0.986514	1.06858	1.00731	0.893586	0.807379	0.810242	0.606108
chr8:Sh3rf1		1.3381	1.3381	1.3381	1.3381	1.3381	1.3381	1.33832	1.40132	1.42224	1.44438	1.49231	1.4745	1.47206	1.49619	1.42056	1.33252	1.33197	1.29034	1.23723	1.02742	0.811112	0.62995	0.485926	0.367064	0.26161	0.263076	0.277699	0.151445	0.148805	0.0991459	0.227248	0.322318	0.410543	0.487343	0.703139	0.71587	0.678833	0.666939	0.779564	0.856173	0.936997	0.93367	0.937496	0.904316	0.913454	0.797433	0.815552	0.76379
chr8:Phkb		1.33779	1.33779	1.33779	1.33779	1.33779	1.33779	1.38832	1.31354	1.23601	1.49074	1.5	1.5	1.5	1.5	1.5	1.5	1.5	1.5	1.5	1.49095	1.09355	0.744696	0.583362	0.426656	0.313365	0.169785	-0.0605148	-0.237694	-0.209564	-0.386238	-0.473949	-0.290723	-0.118447	-0.0761666	0.10799	-0.00410457	0.0249694	0.102125	0.0650494	0.11396	0.333849	0.409054	0.392235	0.38306	0.382142	0.257036	0.366008	0.336546
chr5:Pds5b		1.33481	1.33481	1.33481	1.33481	1.33481	1.33481	1.45071	1.33894	1.40514	1.10494	1.1401	1.0366	1.0033	0.934245	0.818313	0.838896	0.78339	0.546607	0.572905	0.355832	0.356497	0.285482	0.181376	-0.0092495	0.00779771	-0.0353855	0.0026057	0.0227134	0.0884328	0.0454495	-0.0441724	0.0979167	0.225646	0.302866	0.508524	0.684926	0.653066	0.834783	0.935102	1.16411	1.03008	1.40194	1.40218	1.46078	1.40953	1.37917	1.33004	1.36786
chr17:Park2		1.33437	1.33437	1.33437	1.33437	1.33437	1.33437	1.30445	1.1991	1.22302	1.35353	1.46768	1.5	1.5	1.5	1.5	1.5	1.5	1.5	1.49744	1.15225	0.996882	0.764981	0.269505	-0.0788353	-0.314282	-0.524959	-0.880496	-1.107	-1.03707	-0.995112	-0.780212	-0.79631	-0.717259	-0.493547	-0.286934	-0.312872	0.00895433	0.28364	0.603104	0.657909	0.933123	0.959244	1.15712	1.20316	1.24771	1.23044	1.24504	1.01489
chr14:Ndfip2		1.33376	1.33376	1.33376	1.33376	1.33376	1.33376	1.21966	1.34381	1.39822	1.39407	1.41934	1.49507	1.49877	1.33164	1.20888	1.25752	1.2541	1.28628	1.10676	1.07732	1.08788	1.08446	0.934417	0.835408	0.853765	0.904323	0.673283	0.566735	0.480733	0.641858	0.618149	0.636804	0.570823	0.634179	0.635977	0.629965	0.629028	0.836382	0.871209	1.03073	0.886307	0.863204	0.6571	0.552718	0.560786	0.508353	0.410042	0.352214
chr2:Cpxm1		1.33318	1.33318	1.33318	1.33318	1.33318	1.33318	1.30194	1.26612	1.24167	1.23814	1.23169	1.26376	1.21227	1.25777	1.25212	1.26218	1.30334	1.20875	1.25439	1.14386	1.13239	1.13736	1.02357	1.00659	0.947467	0.901518	0.908062	0.856286	0.924248	0.876553	0.910115	0.892832	0.76897	0.736836	0.724127	0.749554	0.766202	0.700649	0.621423	0.600739	0.447194	0.498065	0.462532	0.541361	0.538014	0.385311	0.267215	0.282309
chr12:Immp2l		1.33176	1.33176	1.33176	1.33176	1.33176	1.33176	1.37912	1.36131	1.34571	1.4017	1.39411	1.35171	1.32302	1.28747	1.26305	1.24177	1.21234	1.15381	1.06689	0.969801	0.815725	0.682163	0.547748	0.463645	0.39538	0.315063	0.285372	0.224443	0.199047	0.211642	0.20538	0.290406	0.426017	0.519426	0.632437	0.63019	0.690413	0.696597	0.733925	0.757743	0.839003	0.841126	0.811509	0.812404	0.812982	0.760709	0.777417	0.736578
chr4:Tox		1.33118	1.33118	1.33118	1.33118	1.33118	1.33118	1.25569	1.27212	1.18874	1.20685	1.21858	1.14684	1.16943	1.09953	1.10954	1.02784	1.01647	1.03803	1.00667	0.985132	0.86963	0.810347	0.773368	0.705817	0.646589	0.569381	0.613799	0.564169	0.614039	0.567216	0.571573	0.592215	0.58621	0.634996	0.645436	0.694043	0.753977	0.744478	0.787533	0.7883	0.821345	0.791907	0.760072	0.737581	0.697512	0.711196	0.734492	0.704593
chrX:Tmem164		1.32901	1.32901	1.32901	1.32901	1.32901	1.32901	1.31745	1.32943	1.31631	1.25577	1.16205	0.881779	0.834694	0.845898	0.872611	1.05136	1.10036	0.9878	0.997328	0.864542	0.721763	0.719493	0.842252	0.845269	0.903597	0.834665	0.767608	0.696134	0.76761	0.618872	0.717478	0.702429	0.803089	0.775882	0.715227	0.616477	0.736008	0.620052	0.59791	0.62047	0.80573	0.625535	0.598763	0.467002	0.471191	0.499092	0.460061	0.331743
chr12:Mpp5		1.32851	1.32851	1.32851	1.32851	1.32851	1.32851	1.36595	1.32861	1.19827	0.982456	0.889655	0.753322	0.630239	0.592375	0.610922	0.565417	0.452712	0.433739	0.460343	0.658034	0.656101	0.664563	0.680788	0.716267	0.713773	0.620431	0.564025	0.701149	0.733611	0.653934	0.508976	0.548742	0.588932	0.591776	0.474942	0.644375	0.776525	0.830932	0.753216	0.719261	0.77527	0.923766	0.984076	0.967251	0.9671	0.971104	1.02339	0.98076
chr15:Fkbp11		1.32788	1.32788	1.32788	1.32788	1.32788	1.32788	1.33587	1.41874	1.32473	1.15081	1.09753	1.12677	1.05634	1.06489	1.06393	1.01355	1.14467	1.10254	1.01368	0.961938	1.02053	1.03406	1.0147	1.00658	0.935066	0.900915	0.981095	0.82648	0.79231	0.792924	0.802372	0.813143	0.802947	0.851093	0.821142	0.733001	0.770858	0.776662	0.794723	0.876813	0.768537	0.757275	0.640226	0.571161	0.480665	0.511336	0.564179	0.593064
chr7:Vimp		1.32606	1.32606	1.32606	1.32606	1.32606	1.32606	1.3568	1.44629	1.5	1.5	1.5	1.5	1.5	1.5	1.5	1.5	1.5	1.5	1.39428	1.2557	1.12738	1.00071	0.878652	0.726156	0.632408	0.593475	0.649924	0.603554	0.525292	0.495829	0.516588	0.515022	0.523983	0.541436	0.55936	0.589723	0.527499	0.471937	0.451277	0.529675	0.590963	0.491548	0.405448	0.32661	0.301335	0.287241	0.138681	0.117867
chr8:Nek1		1.32601	1.32601	1.32601	1.32601	1.32601	1.32601	1.40948	1.3347	1.34316	1.25417	1.1337	1.29456	1.34279	1.28726	1.33709	1.2192	1.16271	0.93986	0.964494	0.770264	0.744153	0.619037	0.399307	0.291298	0.119125	0.0186428	0.0588388	0.0809693	0.191804	0.253856	0.472085	0.440915	0.395738	0.505602	0.660526	0.90723	0.968328	1.06821	1.089	1.15535	1.19385	1.14788	1.16298	1.18918	1.15926	1.12015	1.11742	1.05104
chr16:Robo2		1.32423	1.32423	1.32423	1.32423	1.32423	1.32423	1.39523	1.43751	1.28436	1.34673	1.5	1.5	1.5	1.5	1.4868	1.31977	1.19131	0.992412	0.832712	0.808705	0.595893	0.280105	0.174324	0.0869476	-0.111923	-0.184519	-0.245393	-0.219322	-0.189664	-0.153458	-0.132115	0.0147006	0.185362	0.328017	0.427033	0.617498	0.746725	0.92588	1.00387	1.02821	1.10555	1.20721	1.26461	1.23988	1.19968	1.18415	1.1001	0.963786
chr7:Cpeb1		1.32374	1.32374	1.32374	1.32374	1.32374	1.32374	1.3225	1.3	1.5	1.27826	1.20576	1.11805	1.24282	1.19743	1.0933	0.958926	1.03889	0.902111	0.820962	0.526566	0.511639	0.396093	0.441441	0.333899	0.289535	0.198959	0.13808	0.177822	0.325888	0.46561	0.435448	0.450843	0.551341	0.605546	0.631715	0.577632	0.614268	0.717849	0.692087	0.543291	0.575475	0.616682	0.701543	0.700806	0.668512	0.56732	0.489626	0.400568
chr15:Ubr5		1.32341	1.32341	1.32341	1.32341	1.32341	1.32341	1.35117	1.33759	1.29812	1.27477	1.24175	1.19399	1.21384	1.16274	1.08248	1.10884	1.01916	0.879444	0.776381	0.684684	0.685307	0.590806	0.5875	0.528652	0.432597	0.401816	0.298011	0.348313	0.386418	0.448573	0.433508	0.409772	0.464615	0.538253	0.572034	0.655094	0.75671	0.767822	0.740801	0.763611	0.681813	0.757565	0.80524	0.783587	0.737238	0.760448	0.672578	0.647865
chr11:Nf1		1.32205	1.32205	1.32205	1.32205	1.32205	1.32205	1.47692	1.5	1.5	1.5	1.5	1.5	1.5	1.48289	1.44904	1.38654	1.23056	1.08705	1.02536	0.820202	0.725838	0.641164	0.527806	0.411152	0.290254	0.267257	0.255876	0.267772	0.228399	0.142152	0.27411	0.337568	0.440932	0.469969	0.543006	0.585244	0.698747	0.797658	0.911476	0.979188	1.06693	1.05036	1.05762	1.01917	0.978849	0.959895	0.980636	0.851742
chr9:Slc38a3		1.31854	1.31854	1.31854	1.31854	1.31854	1.31854	1.30679	1.21287	1.05984	1.05473	0.960329	0.860105	0.789039	0.730641	0.658531	0.562892	0.514608	0.476362	0.601216	0.787134	0.848459	0.862745	0.958265	1.11267	1.1465	1.15982	1.23213	1.31501	1.18956	1.13472	1.09467	1.00671	1.0126	0.827195	0.653193	0.488664	0.325648	0.293765	0.121192	0.0827772	0.0255173	-0.100284	-0.22842	-0.234694	-0.123669	-0.209467	-0.185255	-0.179991
chr12:Pcnx		1.31675	1.31675	1.31675	1.31675	1.31675	1.31675	1.25515	1.22409	1.33377	1.38678	1.33319	1.32965	1.35502	1.24242	1.26262	1.15537	1.00336	0.901081	0.813463	0.575618	0.442871	0.487478	0.461752	0.313435	0.141576	0.0836053	0.0169063	0.0653015	0.113309	0.22749	0.34283	0.396126	0.444282	0.485097	0.559923	0.845221	0.961785	0.99345	0.959186	1.02846	1.06715	1.16965	1.18211	1.07879	1.07135	1.05347	0.906729	0.788467
chr11:Fnip1		1.31643	1.31643	1.31643	1.31643	1.31643	1.31643	1.35461	1.3805	1.5	1.5	1.5	1.5	1.5	1.5	1.5	1.5	1.5	1.39668	1.30898	1.08531	0.970321	0.941312	0.844131	0.609793	0.492303	0.387074	0.289568	0.178011	0.211857	0.279314	0.296986	0.340159	0.258364	0.269617	0.387191	0.441119	0.442175	0.577126	0.64543	0.769032	0.652281	0.681689	0.782627	0.805922	0.877391	0.802817	0.706516	0.698829
chr10:Plxnc1		1.31602	1.31602	1.31602	1.31602	1.31602	1.31602	1.35038	1.42162	1.33085	1.31425	1.26154	1.35878	1.32964	1.37883	1.32781	1.37628	1.31689	1.19692	1.06584	0.999049	0.892221	0.746098	0.605298	0.423248	0.31987	0.190423	0.152822	0.0204765	0.107542	0.132326	0.161506	0.182746	0.273369	0.352746	0.403643	0.346865	0.494026	0.593151	0.81656	0.833375	0.803882	0.803099	0.76376	0.719241	0.761743	0.834552	0.991689	0.91262
chr16:Sec22a		1.3155	1.3155	1.3155	1.3155	1.3155	1.3155	1.39797	1.47013	1.49514	1.32271	1.22581	1.12721	1.3949	1.1927	1.13707	1.08888	1.05251	1.01035	0.921702	0.972169	1.12145	1.11666	1.00209	0.887656	0.977198	0.833839	0.940071	0.755403	0.709395	0.737468	0.661715	0.724004	0.813025	0.945554	0.958163	0.959569	1.00398	0.893858	0.929874	0.901352	0.670092	0.631392	0.524857	0.462917	0.401586	0.420032	0.438284	0.353524
chr4:Macf1		1.31518	1.31518	1.31518	1.31518	1.31518	1.31518	1.43976	1.46256	1.32426	1.26353	1.26529	1.30672	1.29169	1.07772	0.918465	0.690436	0.657214	0.378207	0.182798	0.0745353	-0.137182	-0.330785	-0.498581	-0.74416	-0.785212	-0.961633	-1.00201	-1.11585	-1.1236	-1.07254	-1.11491	-1.046	-0.924727	-0.838783	-0.765654	-0.627132	-0.613902	-0.523325	-0.451862	-0.333792	-0.331958	-0.287361	-0.17962	-0.128679	-0.159985	-0.112009	-0.20595	-0.217448
chr2:Pdia3		1.31431	1.31431	1.31431	1.31431	1.31431	1.31431	1.5	1.4793	1.5	1.33081	1.10916	1.24758	1.26263	1.34164	1.31152	1.20276	1.10392	0.834611	0.893363	0.807467	0.897449	0.947456	0.820451	0.865113	0.96075	0.94743	0.89956	0.975812	1.09822	1.00883	0.921602	0.835621	0.860995	0.789366	0.714598	0.642732	0.755925	0.877037	0.90065	0.793944	0.810188	0.819445	0.623822	0.664673	0.650845	0.471432	0.299938	0.268988
chr4:Mllt3		1.31429	1.31429	1.31429	1.31429	1.31429	1.31429	1.23472	1.31007	1.30075	1.21601	1.1943	1.16743	1.02486	0.960804	1.05558	0.846009	0.723786	0.647645	0.764062	0.741312	0.543723	0.323685	0.398275	0.365369	0.335238	0.164723	0.295521	0.393909	0.477775	0.369832	0.465659	0.675444	0.898386	0.978449	0.992004	1.03975	1.06179	0.989766	0.832296	0.820172	0.741312	0.681245	0.739682	0.62768	0.443429	0.376837	0.443101	0.489821
chr2:Phf21a		1.3141	1.3141	1.3141	1.3141	1.3141	1.3141	1.20178	1.23282	1.23692	1.28922	1.33266	1.36123	1.32074	1.36938	1.3249	1.26048	1.2482	1.21765	1.1221	1.08145	0.9265	0.806531	0.671447	0.664614	0.591206	0.500887	0.408973	0.36583	0.431114	0.465223	0.436229	0.575398	0.612055	0.672106	0.698962	0.702804	0.762121	0.860982	0.863476	0.894883	0.881918	0.906637	0.830035	0.828481	0.864493	0.805039	0.787648	0.755035
chr1:Mgat5		1.31377	1.31377	1.31377	1.31377	1.31377	1.31377	1.30919	1.26044	1.24396	1.21107	1.16757	1.13599	1.14752	1.09383	1.05864	1.05579	1.04741	1.01759	0.993427	0.962615	0.954165	0.927744	0.921993	0.882164	0.886066	0.901129	0.858361	0.866851	0.882027	0.900274	0.87852	0.863025	0.848385	0.831024	0.83789	0.823377	0.758942	0.756525	0.760734	0.748283	0.750433	0.705891	0.683814	0.666288	0.64516	0.634107	0.584288	0.6345
chr1:Pou2f1		1.31322	1.31322	1.31322	1.31322	1.31322	1.31322	1.42712	1.41475	1.5	1.5	1.5	1.5	1.5	1.5	1.5	1.5	1.5	1.33059	1.13078	0.995929	0.682143	0.366155	0.0816814	-0.158681	-0.442163	-0.590541	-0.66623	-0.81911	-0.786755	-0.839149	-1.05453	-0.817907	-0.619852	-0.219645	0.0470007	0.317918	0.516554	0.600245	0.697961	0.939288	1.21182	1.48424	1.5	1.4935	1.34013	1.17949	0.952022	0.838677
chr11:Ehbp1		1.31312	1.31312	1.31312	1.31312	1.31312	1.31312	1.4184	1.37924	1.38054	1.30418	1.32027	1.42957	1.3689	1.27748	1.19937	1.13853	1.02025	0.803444	0.689157	0.57259	0.5569	0.218617	-0.00993636	-0.124388	-0.339866	-0.374537	-0.435468	-0.518391	-0.577032	-0.53126	-0.507137	-0.407213	-0.214084	-0.00141876	0.26249	0.483229	0.519425	0.655162	0.838426	1.10313	1.21937	1.2092	1.31847	1.30182	1.24975	1.20265	1.12993	1.0863
chr8:Piezo1	Y	1.31281	1.31281	1.31281	1.31281	1.31281	1.31281	1.24565	1.24663	1.18767	1.21291	1.13147	1.16027	1.15625	1.10581	1.03665	1.00614	0.93976	1.02875	0.903499	0.93035	0.87579	0.926326	0.983269	0.880768	0.925366	0.890826	0.939798	0.970871	0.962015	0.988399	0.898978	0.911594	0.880844	0.823892	0.889408	0.845466	0.815154	0.783369	0.73526	0.736968	0.7501	0.774141	0.69959	0.640634	0.572378	0.572973	0.571422	0.592826
chrX:Rps6ka3		1.31105	1.31105	1.31105	1.31105	1.31105	1.31105	1.42053	1.48713	1.48527	1.48047	1.42998	1.40185	1.5	1.39116	1.28417	1.12682	1.06114	0.895064	0.941606	0.801345	0.894757	0.8719	0.653662	0.480903	0.45712	0.467431	0.529828	0.580011	0.585073	0.42443	0.571033	0.488452	0.495456	0.55378	0.627965	0.660313	0.567027	0.577253	0.542276	0.558796	0.664004	0.575438	0.688111	0.814067	0.837935	0.78421	0.750408	0.813995
chr17:Plekhh2		1.30942	1.30942	1.30942	1.30942	1.30942	1.30942	1.3622	1.28014	1.20744	1.18544	1.11803	1.19314	1.24657	1.1626	1.14497	1.05041	0.958559	0.956829	0.917128	0.835434	0.774864	0.633643	0.603993	0.542298	0.575041	0.543371	0.545232	0.62321	0.566275	0.646346	0.63839	0.652394	0.756791	0.665835	0.676282	0.727506	0.795926	0.797129	0.777092	0.814954	0.853549	0.936337	1.01447	0.917441	0.982129	0.938	0.897446	0.808854
chr3:Ppp3ca		1.3082	1.3082	1.3082	1.3082	1.3082	1.3082	1.26345	1.26671	1.25898	1.30008	1.22473	1.19484	1.19623	1.11698	1.08499	1.09488	1.08957	1.09072	1.04412	0.972761	0.906015	0.896148	0.859362	0.821076	0.815461	0.834489	0.769448	0.739491	0.703039	0.682738	0.715119	0.630641	0.639783	0.646593	0.633728	0.654856	0.621831	0.605469	0.661039	0.652152	0.623681	0.590392	0.614843	0.595836	0.583529	0.608527	0.602582	0.629765
chr1:Brinp3		1.30799	1.30799	1.30799	1.30799	1.30799	1.30799	1.38179	1.41947	1.49736	1.46438	1.42831	1.32035	1.41728	1.30888	1.35541	1.236	1.07531	1.05843	0.995219	0.878543	0.797383	0.668266	0.69323	0.60876	0.536957	0.517495	0.449303	0.435568	0.373921	0.412211	0.455887	0.518007	0.658131	0.674347	0.703666	0.741447	0.7675	0.81144	0.776535	0.857504	0.795663	0.833053	0.873824	0.923429	0.918985	0.916198	0.912426	0.810547
chr7:Zfand6		1.30762	1.30762	1.30762	1.30762	1.30762	1.30762	1.22995	1.32703	1.5	1.38241	1.29822	1.07377	1.46161	1.40551	1.4567	1.31272	1.38426	1.45096	1.10275	0.925038	0.781862	0.644821	0.475734	0.280962	0.12393	-0.160876	-0.266434	-0.312912	-0.489882	-0.482485	-0.534704	-0.470874	-0.702314	-0.264329	-0.113725	-0.0177723	0.0232797	0.187035	0.273897	0.282761	0.0871463	0.0747524	0.123556	0.259055	0.12661	0.00922312	-0.0908681	0.0893564
chr13:Rasa1		1.30625	1.30625	1.30625	1.30625	1.30625	1.30625	1.39673	1.38787	1.16998	1.07868	1.24189	1.10508	1.37755	1.17864	1.19173	1.10178	1.11145	1.08323	1.0023	0.926783	0.927473	0.757678	0.937633	0.858399	0.935235	0.767393	0.707614	0.618789	0.594226	0.537622	0.578773	0.486406	0.55558	0.730106	0.669289	0.591277	0.568955	0.39779	0.455929	0.488741	0.618579	0.64422	0.814312	0.653404	0.372243	0.375864	0.368035	0.527985
chr4:Acot7		1.30528	1.30528	1.30528	1.30528	1.30528	1.30528	1.31061	1.15201	1.02167	1.30605	1.20129	1.26474	1.23573	1.02146	0.945795	0.806953	0.677267	0.63866	0.74874	0.740089	0.605549	0.648646	0.692379	0.787274	0.99487	1.03114	1.04823	1.07654	1.02852	1.00043	0.901628	0.869444	0.860708	0.787104	0.670852	0.617167	0.639168	0.676236	0.658431	0.688988	0.76362	0.939397	0.902049	0.918805	0.855821	1.00064	0.895011	0.740674
chr4:Eif4g3		1.30453	1.30453	1.30453	1.30453	1.30453	1.30453	1.45061	1.46722	1.49736	1.45724	1.4474	1.48935	1.5	1.5	1.5	1.5	1.5	1.45946	1.42794	1.24026	1.03415	0.901619	0.697556	0.580904	0.372192	0.353356	0.132501	0.00751615	-0.0429234	-0.155007	-0.130093	-0.000719054	-0.0356403	0.0835966	0.230705	0.392821	0.231496	0.266944	0.270074	0.277026	0.510507	0.523586	0.543803	0.459541	0.480972	0.426411	0.359917	0.530427
chr5:B3glct		1.30113	1.30113	1.30113	1.30113	1.30113	1.30113	1.33102	1.22759	1.20655	1.2216	1.09808	1.00324	0.891378	0.72262	0.637903	0.610029	0.552346	0.551377	0.703115	0.553782	0.485938	0.66276	0.774997	0.791898	0.836733	0.829225	0.939657	0.945311	0.957775	0.831033	0.784306	0.804279	0.859177	0.753965	0.857452	0.925095	0.969521	0.754659	0.8112	0.808751	0.807965	0.964388	0.948178	0.811053	0.860796	0.654662	0.686285	0.641683
chr14:Fam208a		1.30082	1.30082	1.30082	1.30082	1.30082	1.30082	1.32795	1.1243	1.18943	1.15404	1.20429	1.29493	1.23043	1.33136	1.39311	1.17261	1.15667	1.0718	1.09355	0.893922	0.588473	0.434348	0.390525	0.418153	0.248066	0.0554427	0.170364	0.0894584	0.206451	0.26493	0.291822	0.406084	0.360921	0.397336	0.450661	0.608217	0.763318	0.840217	1.00802	1.05101	1.06787	1.05063	1.15493	1.19334	1.25784	1.27553	1.20045	1.05107
chr19:Smarca2		1.29879	1.29879	1.29879	1.29879	1.29879	1.29879	1.36778	1.34347	1.30769	1.42204	1.46359	1.4124	1.23983	1.29398	0.919498	0.96213	1.0047	0.762696	0.876363	0.799748	0.640837	0.496102	0.55714	0.579744	0.420627	0.557474	0.472571	0.307699	0.412483	0.31479	0.203386	0.207711	0.195478	0.182399	0.384872	0.307869	0.29872	0.346707	0.482902	0.545976	0.500271	0.647084	0.612325	0.657272	0.778346	0.515644	0.551209	0.557629
chr7:Shank2		1.29812	1.29812	1.29812	1.29812	1.29812	1.29812	1.32005	1.28557	1.3092	1.33932	1.2933	1.19332	1.19267	1.11044	1.06726	1.06158	1.07901	1.06468	1.02439	0.987489	0.902054	0.884869	0.833443	0.797637	0.791536	0.805541	0.787309	0.809943	0.826353	0.797439	0.759939	0.792861	0.787923	0.829667	0.764466	0.777463	0.831111	0.791716	0.766077	0.741537	0.734399	0.711019	0.695501	0.686237	0.669672	0.713781	0.665696	0.602217
chr11:Zfp207		1.29719	1.29719	1.29719	1.29719	1.29719	1.29719	1.5	1.5	1.5	1.5	1.5	1.5	1.5	1.5	1.5	1.5	1.5	1.19602	0.950251	0.70794	0.534538	0.307296	0.128673	0.0233784	-0.050104	-0.0899842	-0.237161	-0.447461	-0.457834	-0.332253	-0.385206	-0.421964	-0.364908	-0.0954557	-0.157198	-0.138605	-0.158579	-0.0597025	0.141065	0.360697	0.281293	0.467092	0.646585	0.663202	0.524059	0.612241	0.470328	0.518209
chr2:Arhgap21		1.29674	1.29674	1.29674	1.29674	1.29674	1.29674	1.5	1.5	1.5	1.5	1.5	1.5	1.5	1.25193	1.23744	1.22048	0.985485	0.791767	0.698588	0.556952	0.473441	0.506903	0.555553	0.373849	0.368577	0.227318	0.0540086	0.0127392	0.112059	0.114919	0.22701	0.244776	0.168672	0.257098	0.422661	0.334459	0.516142	0.513149	0.588894	0.600618	0.66785	0.450355	0.449898	0.499027	0.374295	0.290749	0.273078	0.164289
chr15:Zfpm2		1.29665	1.29665	1.29665	1.29665	1.29665	1.29665	1.32542	1.31602	1.29741	1.32917	1.30317	1.27505	1.26682	1.24096	1.21478	1.1532	1.04012	0.974151	0.931173	0.863327	0.800104	0.768565	0.670793	0.581323	0.511196	0.446851	0.416351	0.439033	0.427205	0.417593	0.448956	0.4973	0.523797	0.59944	0.659602	0.719049	0.77379	0.839131	0.839355	0.885045	0.919819	0.940559	0.932361	0.939954	0.911839	0.890462	0.916806	0.920873
chr3:Tspan5		1.29617	1.29617	1.29617	1.29617	1.29617	1.29617	1.26998	1.32881	1.30395	1.28484	1.28551	1.26357	1.29332	1.21074	1.21254	1.08924	1.03442	0.993948	0.894336	0.867259	0.779988	0.73564	0.715273	0.600849	0.630791	0.583453	0.562022	0.644291	0.623891	0.639042	0.641024	0.658426	0.68124	0.670435	0.662406	0.64479	0.672447	0.719932	0.681158	0.732746	0.75085	0.750648	0.804241	0.777385	0.806802	0.838146	0.849596	0.804501
chr7:Spon1		1.29615	1.29615	1.29615	1.29615	1.29615	1.29615	1.41874	1.45899	1.4281	1.46912	1.33448	1.29574	1.31138	1.28826	1.20347	1.1326	1.08362	0.932875	0.849803	0.737765	0.68758	0.739099	0.702325	0.574846	0.481499	0.463857	0.442523	0.431324	0.566642	0.577874	0.671832	0.699055	0.764971	0.813603	0.873841	0.976492	0.967719	1.00533	0.991448	0.917936	0.938847	0.790406	0.769195	0.664333	0.623115	0.535598	0.418008	0.3666
chr2:Cwc22		1.29558	1.29558	1.29558	1.29558	1.29558	1.29558	1.5	1.5	1.5	1.5	1.5	1.5	1.5	1.5	1.5	1.5	1.5	1.21399	0.961617	0.709632	0.49615	0.200478	-0.149075	-0.331046	-0.437264	-0.516861	-0.620463	-0.652626	-0.650526	-0.605526	-0.480914	-0.273334	-0.0774135	0.0986054	0.335125	0.402642	0.467811	0.574867	0.595085	0.824022	1.03313	1.10163	0.996784	1.09419	1.16049	0.97644	0.836978	0.706922
chr4:Alpl		1.29503	1.29503	1.29503	1.29503	1.29503	1.29503	1.2783	1.29695	1.13077	1.154	1.20629	1.26143	1.11403	1.12686	1.03376	0.940631	0.935738	0.894375	0.858779	0.946328	0.973534	0.905999	0.811811	0.914761	0.922825	0.957359	0.939836	0.89436	0.930159	0.91243	0.912304	0.821111	0.841578	0.833587	0.758678	0.710821	0.758648	0.821444	0.754515	0.792684	0.745982	0.685162	0.682325	0.709219	0.708194	0.638999	0.631666	0.608441
chr10:Tspan31		1.29057	1.29057	1.29057	1.29057	1.29057	1.29057	1.22621	1.15078	1.02756	0.910342	0.967172	0.863439	0.845569	0.807617	0.910439	1.03864	1.11884	1.22184	1.23559	1.30184	1.4132	1.35709	1.33834	1.36045	1.20578	1.05752	1.08471	1.01146	1.0116	0.953528	0.889403	0.783917	0.661182	0.682471	0.662644	0.791476	0.863134	0.816707	0.758045	0.609467	0.585963	0.59279	0.622047	0.568446	0.498597	0.391057	0.382622	0.177782
chr2:Immp1l		1.28845	1.28845	1.28845	1.28845	1.28845	1.28845	1.5	1.5	1.5	1.37761	1.5	1.5	1.5	1.5	1.5	1.39078	1.24177	1.05685	1.02333	1.11511	1.00091	0.78524	0.664108	0.255798	0.401622	0.481918	0.39012	0.532242	0.564345	0.848043	0.897388	0.733862	0.791988	0.775167	0.870797	0.524576	0.583673	0.821628	0.698386	0.722569	0.344369	0.260572	0.571015	0.59539	0.599834	0.505756	0.495751	0.531302
chr3:Nlgn1		1.28837	1.28837	1.28837	1.28837	1.28837	1.28837	1.26099	1.28242	1.26682	1.2967	1.29813	1.20184	1.17188	1.15423	1.11379	1.07101	1.01443	0.997578	0.863102	0.745052	0.615532	0.497001	0.443455	0.354008	0.247377	0.222809	0.19498	0.145042	0.140747	0.184694	0.153506	0.202579	0.254627	0.276284	0.321486	0.327822	0.300172	0.275739	0.310743	0.298527	0.278759	0.26103	0.246723	0.227475	0.220653	0.193453	0.199669	0.196094
chr5:Adrbk2		1.28709	1.28709	1.28709	1.28709	1.28709	1.28709	1.26979	1.27986	1.29982	1.23902	1.20904	1.17584	1.12519	1.15373	1.19852	1.17218	1.16969	1.13262	1.02174	0.913616	0.908712	0.873444	0.978995	0.845148	0.686838	0.620761	0.582143	0.571634	0.644023	0.706485	0.718518	0.829466	0.801586	0.681693	0.823125	1.02751	0.970409	0.939896	0.774329	0.702633	0.69879	0.61606	0.500269	0.628481	0.795841	0.768802	0.589688	0.612383
chr2:Cep152		1.28636	1.28636	1.28636	1.28636	1.28636	1.28636	1.31903	1.28583	1.17201	1.29322	1.0951	1.08598	1.06955	1.03738	0.951419	0.90166	0.859222	0.726472	0.769976	0.882535	0.822427	0.91314	0.959513	1.00893	1.04228	1.06594	1.09207	1.13441	1.16841	1.05905	1.01694	0.971878	0.892553	0.814386	0.748541	0.727537	0.669136	0.53103	0.526751	0.54016	0.630779	0.706215	0.671066	0.730939	0.74346	0.698325	0.657127	0.653316
chr18:Rab27b		1.28535	1.28535	1.28535	1.28535	1.28535	1.28535	1.34686	1.24096	1.36514	1.27085	1.28581	1.20588	1.07322	0.942044	0.945939	0.751472	0.840838	0.690442	0.713302	0.528562	0.638471	0.589733	0.583378	0.626902	0.54618	0.540721	0.564069	0.581468	0.6483	0.64531	0.667268	0.660679	0.761288	0.652952	0.65829	0.67053	0.748927	0.796553	0.706669	0.772017	0.776333	0.782842	0.765546	0.825972	0.99364	0.933855	1.02929	0.963313
chr7:4732471J01Rik		1.28476	1.28476	1.28476	1.28476	1.28476	1.28476	1.44459	1.26598	1.2739	1.32821	1.38672	1.5	1.48351	1.26718	1.30327	1.24518	1.29333	1.16223	1.19601	0.995649	0.674403	0.629947	0.412244	0.315239	0.60657	0.468242	0.414278	0.37198	0.315775	0.328308	0.430621	0.471465	0.37844	0.424499	0.482466	0.38818	0.566896	0.686624	0.689341	0.754104	0.87511	0.975568	1.21311	1.33054	1.38547	1.36411	1.15772	1.06382
chr17:Thada		1.28395	1.28395	1.28395	1.28395	1.28395	1.28395	1.37188	1.35143	1.40232	1.48592	1.41287	1.5	1.5	1.3413	1.33047	1.44694	1.44196	1.25777	1.10387	1.02357	0.771921	0.751165	0.49396	0.286869	0.281501	0.323682	0.324042	0.107342	0.102315	0.0201794	0.0909531	0.32678	0.366849	0.561673	0.621201	0.710048	0.605709	0.500593	0.67325	0.634187	0.81895	0.814001	0.749552	0.9672	1.01511	1.07968	1.06872	0.946465
chr9:Arhgap32		1.28324	1.28324	1.28324	1.28324	1.28324	1.28324	1.32682	1.29483	1.30306	1.31814	1.29068	1.19793	1.13617	1.06216	1.07281	1.04138	0.988886	0.989744	0.978797	0.915935	0.881997	0.827731	0.806932	0.764433	0.695438	0.610976	0.605049	0.602968	0.583753	0.518996	0.57479	0.584685	0.646591	0.702684	0.722864	0.760592	0.807404	0.829867	0.863073	0.896902	0.95231	0.965948	0.946554	0.945682	0.908543	0.948603	0.926264	0.925779
chr11:Sdk2		1.2832	1.2832	1.2832	1.2832	1.2832	1.2832	1.30323	1.31317	1.36533	1.33265	1.37375	1.46625	1.43684	1.41812	1.38012	1.32427	1.2579	1.1674	1.13683	0.972385	0.875168	0.732489	0.538603	0.51614	0.421355	0.393323	0.468021	0.281235	0.207149	0.116545	0.148218	0.269515	0.213462	0.231341	0.238598	0.261719	0.186742	0.242598	0.391671	0.398138	0.431779	0.390899	0.322885	0.52012	0.516536	0.357863	0.380421	0.454411
chr11:Col23a1		1.28137	1.28137	1.28137	1.28137	1.28137	1.28137	1.28478	1.25306	1.2065	1.21449	1.18765	1.17563	1.14563	1.13429	1.08452	1.0517	1.04856	1.021	1.01658	0.965069	0.922172	0.894685	0.871675	0.836053	0.806046	0.793135	0.782836	0.716559	0.694808	0.703414	0.695083	0.679602	0.654511	0.673499	0.689036	0.691995	0.716675	0.729678	0.767124	0.775215	0.755551	0.753561	0.75561	0.775377	0.764756	0.732831	0.714769	0.691756
chr18:Tnfaip8		1.28098	1.28098	1.28098	1.28098	1.28098	1.28098	1.17815	1.24964	1.17336	1.12955	1.11675	1.01891	1.0228	0.926634	0.868637	0.838822	0.824161	0.845998	0.802601	0.831669	0.856641	0.805543	0.798521	0.815482	0.913821	0.778681	0.660399	0.613692	0.630253	0.597573	0.590556	0.560716	0.494382	0.498745	0.55196	0.445749	0.584256	0.639958	0.641991	0.590478	0.517246	0.557205	0.523405	0.610905	0.634676	0.61272	0.675721	0.661252
chr2:Rabgap1		1.28047	1.28047	1.28047	1.28047	1.28047	1.28047	1.30999	1.3565	1.11643	1.32547	1.3387	1.16764	0.955171	0.932589	0.979196	1.08437	0.874685	0.864276	0.750207	0.756019	0.564516	0.201662	0.1768	0.15193	-0.0543961	-0.342082	-0.466347	-0.379027	-0.453607	-0.469718	-0.470388	-0.429345	-0.183418	-0.193842	-0.0266845	0.253327	0.355827	0.400869	0.195783	0.30211	0.410762	0.392139	0.428754	0.371651	0.480769	0.471896	0.276723	0.178338
chrX:Klf8		1.27865	1.27865	1.27865	1.27865	1.27865	1.27865	1.32779	1.38195	1.5	1.399	1.49647	1.38587	1.38017	1.26568	1.28061	1.22466	1.22949	1.1423	0.995853	0.800846	0.79658	0.655967	0.596956	0.490559	0.467237	0.411445	0.391703	0.254955	0.381145	0.346955	0.428132	0.446385	0.473715	0.601831	0.698713	0.704189	0.812187	0.870426	0.893204	0.788387	0.961797	0.945927	0.948281	0.918573	0.819169	0.855497	0.898668	0.762437
chr1:Cspp1		1.27749	1.27749	1.27749	1.27749	1.27749	1.27749	1.35609	1.39353	1.43327	1.44477	1.5	1.5	1.5	1.48981	1.5	1.5	1.47365	1.34552	1.2861	1.00867	0.895374	0.699337	0.601522	0.5313	0.465471	0.446066	0.392307	0.349779	0.350898	0.33843	0.454162	0.509356	0.564584	0.5698	0.612035	0.652175	0.638575	0.657423	0.740133	0.758388	0.795391	0.735272	0.709433	0.752474	0.753395	0.655411	0.636184	0.55262
chr3:Rnf13		1.27717	1.27717	1.27717	1.27717	1.27717	1.27717	1.28414	1.44192	1.5	1.5	1.42454	1.40459	1.38138	1.3216	1.20095	1.03665	0.921193	0.613096	0.233792	-0.0966292	-0.255348	-0.252441	-0.477303	-0.765266	-1.02064	-1.05163	-1.00654	-1.2444	-0.965063	-0.818762	-0.624631	-0.324151	-0.419864	-0.353825	-0.0426997	0.0681599	0.016404	0.0369374	0.134035	0.156706	0.0994134	-0.0769762	-0.291513	-0.27342	-0.270825	-0.498063	-0.505656	-0.454324
chr3:Fndc3b		1.27662	1.27662	1.27662	1.27662	1.27662	1.27662	1.1738	1.09682	0.980037	1.2457	1.0003	0.752195	0.846721	0.848458	0.893322	0.866589	0.899002	0.881692	0.715624	0.662612	0.451084	0.438823	0.537703	0.354806	0.37368	0.234828	0.226903	0.283768	0.410668	0.668166	0.68736	0.618314	0.695369	0.822239	0.858109	0.79845	0.79363	0.781957	0.863119	0.672035	0.675934	0.632529	0.787715	0.783953	0.647745	0.621173	0.581926	0.604386
chr7:Prkcb		1.27631	1.27631	1.27631	1.27631	1.27631	1.27631	1.25298	1.20006	1.14507	1.13078	1.16767	1.05145	1.03364	1.06522	1.01695	1.08222	1.10932	1.07609	1.07998	1.0235	0.997573	0.903557	0.936222	0.865061	0.818432	0.845087	0.845179	0.826424	0.808784	0.801615	0.78337	0.754116	0.778751	0.711283	0.730116	0.718626	0.685254	0.659717	0.692125	0.675287	0.676028	0.668554	0.727633	0.673643	0.716323	0.696765	0.717554	0.80098
chr9:Nphp3		1.27605	1.27605	1.27605	1.27605	1.27605	1.27605	1.32289	1.27636	1.14815	1.19321	1.23579	1.17793	1.18937	1.21774	1.08898	1.09018	1.06461	1.03206	1.0228	1.09273	1.1297	1.0748	1.05658	1.01243	0.96212	1.06203	0.970425	0.915093	0.790185	0.802181	0.775403	0.752176	0.781152	0.780011	0.785736	0.776937	0.700398	0.715101	0.719962	0.826467	0.755889	0.734355	0.733863	0.698399	0.707499	0.710626	0.645554	0.635146
chr13:Parp8		1.27544	1.27544	1.27544	1.27544	1.27544	1.27544	1.4408	1.47037	1.49251	1.5	1.5	1.5	1.5	1.5	1.5	1.5	1.27524	1.06116	0.858622	0.591795	0.132738	-0.0506191	-0.234211	-0.488094	-0.731894	-0.972419	-1.11521	-1.07491	-1.09372	-1.08026	-1.00063	-0.739635	-0.554701	-0.390552	-0.184672	0.123655	0.329416	0.501814	0.622853	0.777998	0.945985	0.986926	0.965443	0.913155	0.840829	0.727966	0.584713	0.530737
chrX:Kdm6a		1.27498	1.27498	1.27498	1.27498	1.27498	1.27498	1.35344	1.3055	1.5	1.37519	1.23717	1.02781	1.19601	1.34824	1.27164	1.2509	1.09376	0.962849	0.921404	0.732338	0.741201	0.685994	0.720371	0.532347	0.40315	0.222824	0.0706906	0.105413	0.1239	0.049413	0.0182139	-0.0526914	0.0340353	0.149484	0.183037	0.191967	0.418336	0.503821	0.515069	0.562683	0.671001	0.573756	0.632436	0.687227	0.633614	0.712135	0.643742	0.458933
chr5:Lcorl		1.27392	1.27392	1.27392	1.27392	1.27392	1.27392	1.26311	1.37464	1.35528	1.3854	1.43375	1.30569	1.29386	1.16026	1.22211	1.04071	0.887454	0.911936	0.780432	0.671862	0.573505	0.494503	0.503635	0.452726	0.403727	0.277146	0.260437	0.295841	0.232262	0.166966	0.310813	0.397981	0.404163	0.39981	0.448788	0.504756	0.599675	0.682401	0.635648	0.755741	0.861911	0.834445	0.779833	0.96173	0.977646	0.987187	0.845707	0.84935
chr6:Agbl3		1.2736	1.2736	1.2736	1.2736	1.2736	1.2736	1.27637	1.39469	1.44035	1.26283	1.28824	1.2131	1.31232	1.22702	1.33768	1.29644	1.15918	1.14991	1.02345	0.892694	0.905861	0.89015	0.915416	0.742406	0.603952	0.569282	0.518486	0.496259	0.588737	0.525523	0.467227	0.506747	0.496992	0.508547	0.706688	0.900878	0.861829	0.868929	0.880613	0.761227	0.79945	0.801147	0.732183	0.65139	0.723425	0.64938	0.478688	0.382362
chr17:Camkmt		1.27341	1.27341	1.27341	1.27341	1.27341	1.27341	1.25162	1.19466	1.45016	1.5	1.5	1.47401	1.5	1.47844	1.38918	1.39105	1.26065	1.25535	1.23091	0.965785	0.755672	0.68128	0.822345	0.714281	0.733769	0.603026	0.484893	0.431543	0.216381	0.324402	0.366616	0.291462	0.488338	0.432621	0.36322	0.419206	0.689121	0.622251	0.775541	0.836493	0.870644	0.942678	0.845218	0.764822	0.713259	0.721015	0.67024	0.691076
chr1:Sntg1		1.27271	1.27271	1.27271	1.27271	1.27271	1.27271	1.23214	1.20544	1.21177	1.20891	1.14913	1.15506	1.18068	1.12823	1.13481	1.14968	1.13817	1.14079	1.12327	1.05035	0.992936	0.992578	0.924907	0.840289	0.800761	0.726077	0.696836	0.676234	0.683034	0.702139	0.700209	0.725487	0.722369	0.730313	0.7521	0.764949	0.797221	0.799688	0.778046	0.768645	0.749017	0.745562	0.771905	0.776078	0.778367	0.767258	0.778472	0.768678
chr3:Glrb		1.27184	1.27184	1.27184	1.27184	1.27184	1.27184	1.26055	1.15672	1.05223	0.973893	1.04575	1.00221	0.874716	0.889181	0.852537	0.912474	0.883666	0.814531	0.901038	0.908028	1.08533	1.04196	1.07535	1.17179	1.13273	1.18214	1.15133	1.10038	1.17636	1.1483	0.953994	0.872483	0.755727	0.690612	0.660864	0.640149	0.550304	0.490901	0.590587	0.57567	0.523228	0.692372	0.57066	0.505113	0.423698	0.408331	0.461068	0.547443
chr12:Ncoa1		1.27182	1.27182	1.27182	1.27182	1.27182	1.27182	1.3233	1.28193	1.25479	1.21095	1.16072	1.12519	1.23878	1.12642	1.21429	1.20115	1.2064	1.16918	1.21402	1.14849	1.06062	1.11355	0.982591	0.857231	0.927914	0.871579	0.819787	0.744495	0.71468	0.671861	0.690345	0.790593	0.711712	0.749372	0.865015	0.750585	0.687891	0.628419	0.615197	0.635888	0.619615	0.537171	0.449871	0.549688	0.596056	0.545154	0.616737	0.609135
chr16:Lpp		1.27083	1.27083	1.27083	1.27083	1.27083	1.27083	1.15582	1.20675	1.15654	1.16409	0.828803	0.623681	0.571823	0.404527	0.403907	0.220177	0.0734884	-0.0749193	-0.173557	-0.483187	-0.595981	-0.784632	-0.971294	-1.04664	-1.10758	-1.4709	-1.43992	-1.38406	-1.00571	-1.12781	-1.2072	-1.36469	-1.32981	-1.19733	-1.33261	-0.95621	-0.741782	-0.408058	-0.197761	-0.328316	-0.1694	0.015631	0.0636705	0.202537	0.37917	0.710248	0.575501	0.321249
chr11:Abca8b		1.27081	1.27081	1.27081	1.27081	1.27081	1.27081	1.28736	1.27119	1.2507	1.24233	1.22867	1.19313	1.20295	1.16562	1.13426	1.08954	1.06889	1.03338	1.02125	0.976053	0.942432	0.91479	0.919053	0.90301	0.886701	0.889465	0.885168	0.868523	0.852977	0.823109	0.858526	0.876952	0.869647	0.824767	0.809529	0.818149	0.790896	0.785471	0.779553	0.76282	0.779376	0.732406	0.705913	0.663771	0.669703	0.664519	0.633231	0.608629
chr1:Gm20342		1.26743	1.26743	1.26743	1.26743	1.26743	1.26743	1.27033	1.18108	1.29188	1.4013	1.34777	1.37825	1.45317	1.37312	1.20177	1.18369	1.20411	1.28874	1.20536	1.13893	0.880949	0.814378	0.731657	0.715396	0.682336	0.655774	0.605814	0.575585	0.369282	0.437774	0.384377	0.529655	0.583171	0.577234	0.630714	0.52725	0.561291	0.631597	0.690119	0.83636	0.817515	0.831999	0.716591	0.709902	0.694371	0.626501	0.594461	0.648428
chr12:Ston2		1.2667	1.2667	1.2667	1.2667	1.2667	1.2667	1.43126	1.32568	1.45385	1.5	1.5	1.36034	1.5	1.35313	1.39129	1.46025	1.5	1.5	1.5	1.5	1.16061	0.970986	0.969196	0.76165	0.534629	0.41231	0.27993	-0.0815183	-0.53714	-0.414539	-0.309834	-0.144627	-0.124339	-0.0102654	0.231021	0.255643	0.445166	0.447202	0.580466	0.735042	0.672845	0.643707	0.507422	0.336933	0.22866	0.0427651	-0.0424154	-0.26299
chr1:Trp53bp2		1.26612	1.26612	1.26612	1.26612	1.26612	1.26612	1.29136	1.26314	1.14747	1.12303	1.06321	1.09306	0.924708	0.861676	0.745299	0.62855	0.785232	0.826505	0.812791	0.812994	0.833139	0.713545	0.69714	0.851234	0.939893	0.94619	1.09616	1.00777	0.918585	0.930522	0.952814	0.90765	0.922018	0.989497	0.881271	0.71771	0.820032	0.731723	0.690469	0.767614	0.708909	0.73511	0.60194	0.667828	0.598689	0.704113	0.888223	0.754926
chrX:Fgf13		1.26379	1.26379	1.26379	1.26379	1.26379	1.26379	1.23518	1.18401	1.15698	1.20723	1.19912	1.19184	1.24779	1.19843	1.14318	1.1037	1.07944	1.06124	1.03992	0.954223	0.851589	0.775569	0.74302	0.672539	0.676006	0.663822	0.65528	0.592322	0.597204	0.552311	0.620612	0.666927	0.738685	0.770357	0.752341	0.720236	0.715752	0.705145	0.770731	0.738338	0.774718	0.718727	0.707977	0.636936	0.613197	0.604726	0.647038	0.654461
chr4:Mmp16		1.26371	1.26371	1.26371	1.26371	1.26371	1.26371	1.13643	1.22298	1.28767	1.33341	1.19713	1.25281	1.27656	1.39699	1.29301	1.07424	1.0777	1.24643	1.14778	0.849173	0.836703	0.804397	0.794695	0.735074	0.688156	0.754549	0.85659	0.702185	0.690805	0.885615	1.11147	0.990266	1.15348	1.01294	0.954615	0.83353	0.786937	0.580852	0.60599	0.585725	0.357809	0.0472009	0.208471	0.0537408	0.137802	0.210464	0.132544	0.295545
chr12:Flrt2		1.26256	1.26256	1.26256	1.26256	1.26256	1.26256	1.24161	1.22971	1.17459	1.23826	1.3039	1.1859	1.21443	1.19609	1.14055	1.07123	1.05627	1.04024	1.03961	0.983145	0.937841	0.870947	0.834532	0.747573	0.655992	0.663745	0.651385	0.611903	0.649682	0.579749	0.570855	0.554878	0.565028	0.570723	0.591431	0.656665	0.599394	0.587541	0.608962	0.620028	0.602409	0.6356	0.626644	0.636308	0.64912	0.648241	0.660732	0.697959
chr3:Ostc		1.26218	1.26218	1.26218	1.26218	1.26218	1.26218	1.25102	1.21681	1.37535	1.36511	1.48661	1.5	1.5	1.5	1.5	1.5	1.5	1.5	1.5	1.5	1.5	1.5	1.37803	1.23826	1.04495	0.96771	0.771327	0.515599	0.415082	0.260607	0.29288	0.277291	0.363799	0.302644	0.296428	0.302172	0.288423	0.173041	0.200415	0.142971	0.145174	0.113203	0.0599096	0.0346403	-0.0129819	-0.014462	0.00161216	-0.0412805
chr19:Glis3		1.2618	1.2618	1.2618	1.2618	1.2618	1.2618	1.22167	1.07225	0.979836	1.01597	0.834695	0.857628	0.814837	0.744204	0.547327	0.267479	0.312342	0.236496	0.22351	-0.0837002	-0.283166	-0.382787	-0.451346	-0.391382	-0.621703	-0.621407	-0.528417	-0.536654	-0.457532	-0.585865	-0.382086	-0.457757	-0.369054	-0.44807	-0.519366	-0.554712	-0.433086	-0.38638	-0.348151	-0.339936	-0.374508	-0.588666	-0.569761	-0.697425	-0.785303	-0.856104	-0.8487	-1.02161
chr11:Efemp1		1.2616	1.2616	1.2616	1.2616	1.2616	1.2616	1.24817	1.20843	1.17404	1.14269	1.12762	1.14726	1.16393	1.19113	1.17439	1.17234	1.16156	1.15762	1.16732	1.13536	1.11901	1.09693	1.05447	1.03445	0.981245	0.970999	0.928185	0.875497	0.855728	0.814664	0.792483	0.769041	0.722969	0.681945	0.613807	0.609646	0.581611	0.564494	0.545149	0.509086	0.517651	0.501776	0.482232	0.463825	0.448839	0.466298	0.478529	0.496162
chr11:Acyp2		1.26154	1.26154	1.26154	1.26154	1.26154	1.26154	1.18246	0.970656	0.736188	0.711992	1.02995	0.943342	0.807721	0.592011	0.726132	0.64064	0.506944	0.659812	0.837154	0.750816	0.467059	0.0454665	0.0081941	0.211059	0.343949	0.127837	0.199372	0.195143	0.101359	0.0179987	0.0311689	0.0257347	0.41762	0.417641	0.355077	0.298968	0.293069	0.157152	0.411986	0.318274	0.105383	0.48401	0.749638	0.513402	0.512299	0.605932	0.470139	0.737803
chr15:Sntb1		1.26109	1.26109	1.26109	1.26109	1.26109	1.26109	1.29542	1.2792	1.27866	1.34144	1.36905	1.31581	1.3282	1.30469	1.28976	1.23022	1.16443	1.06347	0.984894	0.880428	0.750509	0.681095	0.634853	0.540134	0.461265	0.448139	0.417825	0.366497	0.404836	0.418266	0.435901	0.479598	0.524713	0.54725	0.584271	0.640428	0.626734	0.6735	0.727826	0.750162	0.810893	0.838924	0.887635	0.865879	0.88708	0.875386	0.810267	0.736313
chr18:Lman1		1.26034	1.26034	1.26034	1.26034	1.26034	1.26034	1.24919	1.22841	1.24886	1.21191	1.23024	1.22012	1.32648	1.4046	1.41275	1.39456	1.34115	1.27964	1.15874	1.04966	0.962625	0.832884	0.778882	0.657674	0.56848	0.559683	0.421999	0.389235	0.377205	0.453788	0.462461	0.596984	0.703123	0.712299	0.823302	0.855943	0.837628	0.933138	0.882833	0.900517	0.85748	0.860711	0.789806	0.702318	0.736293	0.631398	0.591859	0.564429
chr4:Grik3		1.25868	1.25868	1.25868	1.25868	1.25868	1.25868	1.17844	1.16096	1.12747	1.12922	0.98193	0.954023	1.02046	1.05889	1.12855	1.17526	1.17781	1.18924	1.23746	1.22579	1.22502	1.28125	1.24752	1.124	1.07095	1.01842	1.06857	1.09045	1.0476	1.00139	0.932539	0.812998	0.699029	0.619904	0.546468	0.587472	0.55735	0.533048	0.425764	0.339871	0.331865	0.349191	0.434042	0.5075	0.584069	0.663252	0.676063	0.659683
chr5:Grk4		1.25783	1.25783	1.25783	1.25783	1.25783	1.25783	1.27708	1.22469	1.28867	1.37463	1.5	1.5	1.46151	1.3599	1.27133	1.31538	1.5	1.32292	1.16619	0.932449	0.790712	0.595625	0.464363	0.402067	0.379293	0.219246	0.0846011	-0.104544	-0.00222727	0.0843187	0.0553088	0.0595584	0.102942	0.164697	0.127778	0.224165	0.382764	0.489159	0.427066	0.542381	0.513359	0.572719	0.575723	0.517311	0.54772	0.731591	0.718364	0.576236
chr4:Thap3		1.25596	1.25596	1.25596	1.25596	1.25596	1.25596	1.24603	1.30467	1.32516	1.42186	1.43129	1.39532	1.14114	1.05423	1.03061	1.15384	1.22813	1.22569	1.04788	0.920632	0.847485	0.662661	0.686871	0.775654	0.789097	0.756887	0.591407	0.462562	0.60038	0.719466	0.757278	0.806984	0.935341	0.982298	0.995829	0.933025	0.94204	1.01359	1.08224	0.962024	0.893633	0.760382	0.704249	0.638435	0.626368	0.683858	0.666865	0.49311
chrX:Thoc2		1.25575	1.25575	1.25575	1.25575	1.25575	1.25575	0.915653	0.892002	1.00961	1.16277	1.21072	1.36349	1.5	1.5	1.30746	1.24404	1.29853	1.30037	0.979727	0.836653	0.64411	0.335113	0.140022	-0.0421781	-0.318067	-0.210692	-0.243163	-0.509784	-0.386241	-0.198631	-0.0911303	0.0699984	0.343401	0.459274	0.560383	0.851062	0.954259	1.10109	1.16831	1.20968	1.24558	1.12601	1.07325	1.12307	0.944449	1.00519	0.660933	0.658021
chr10:Rmst		1.2556	1.2556	1.2556	1.2556	1.2556	1.2556	1.37756	1.30353	1.34902	1.45656	1.39675	1.47665	1.5	1.5	1.49369	1.47773	1.36936	1.215	1.13329	0.938517	0.675704	0.528733	0.338581	0.167017	0.0181779	-0.0312836	-0.162918	-0.280262	-0.271197	-0.167094	-0.0612639	0.0855617	0.141	0.184974	0.349123	0.548389	0.587775	0.760264	0.93124	1.0926	1.13248	1.16186	1.30895	1.41538	1.44947	1.3368	1.18284	1.09269
chr1:Rgs20		1.25481	1.25481	1.25481	1.25481	1.25481	1.25481	1.30431	1.32662	1.3859	1.4286	1.33544	1.34494	1.38748	1.36668	1.35512	1.25746	1.18571	1.06708	0.979309	0.859604	0.719604	0.621513	0.521702	0.397083	0.32109	0.2504	0.227581	0.189373	0.203125	0.226007	0.272245	0.362515	0.421169	0.488029	0.579995	0.676587	0.737512	0.828426	0.86842	0.975469	1.01467	1.04252	1.01928	0.997816	0.994134	0.985685	0.912065	0.89793
chr8:Adamts18		1.25334	1.25334	1.25334	1.25334	1.25334	1.25334	1.21531	1.22836	1.23038	1.26376	1.23549	1.23308	1.23841	1.27373	1.26778	1.29498	1.33907	1.33462	1.30411	1.26636	1.23604	1.18583	1.16222	1.08955	1.02937	0.983372	0.920045	0.837763	0.815121	0.770272	0.736898	0.685544	0.660895	0.617223	0.614164	0.600625	0.604663	0.650483	0.677984	0.66379	0.668041	0.634829	0.629918	0.578714	0.557017	0.590082	0.569415	0.547111
chr5:Pan3		1.25173	1.25173	1.25173	1.25173	1.25173	1.25173	1.32461	1.37549	1.33805	1.37889	1.44428	1.5	1.48716	1.5	1.45415	1.47015	1.35382	1.24484	1.23463	1.16456	1.08701	0.913321	0.695951	0.675098	0.533567	0.43925	0.318963	0.270514	0.249969	0.185892	0.245291	0.268089	0.368622	0.472532	0.486137	0.530738	0.62988	0.640404	0.712043	0.805717	0.828529	0.703078	0.687034	0.701121	0.732686	0.641143	0.60789	0.602107
chr9:Senp6		1.25167	1.25167	1.25167	1.25167	1.25167	1.25167	1.21336	1.34572	1.5	1.5	1.5	1.5	1.48552	1.5	1.46338	1.35889	1.24333	1.23298	1.05055	0.82985	0.604192	0.63238	0.519281	0.522943	0.30993	0.288894	0.334027	0.275759	0.194584	0.230599	0.225445	0.183786	0.383624	0.357202	0.388282	0.548506	0.791944	0.667873	0.70213	0.683926	0.58761	0.65427	0.734949	0.800992	0.833592	0.868973	0.678293	0.517108
chr4:Cyp2j13		1.25075	1.25075	1.25075	1.25075	1.25075	1.25075	1.19593	1.08062	1.11035	1.0418	1.01336	1.02083	1.02121	1.07234	1.05856	1.05948	0.924277	0.95889	1.02281	0.95537	1.02368	1.11013	1.08163	1.11946	1.08812	1.06597	1.02599	1.06111	1.00552	1.03878	1.10995	1.15252	1.00884	0.970126	0.964826	0.888368	0.842998	0.813506	0.799713	0.771278	0.689553	0.59726	0.476893	0.533842	0.576047	0.490978	0.488414	0.462719
chrX:Gprasp1		1.2498	1.2498	1.2498	1.2498	1.2498	1.2498	1.04482	1.16563	1.13518	1.15599	1.11233	0.901228	0.622712	0.616175	0.681594	0.644654	0.506456	0.490112	0.563515	0.589052	0.667929	0.60805	0.746505	0.772767	0.576352	0.614387	0.661421	0.486424	0.661645	0.600816	0.620199	0.584487	0.720643	0.71072	0.979876	0.871381	0.860727	0.802544	0.955993	0.920308	1.09278	0.976151	0.814845	0.822205	1.07679	1.08888	1.29418	1.14384
chr1:Pard3b		1.24856	1.24856	1.24856	1.24856	1.24856	1.24856	1.25492	1.27277	1.20795	1.19349	1.21021	1.15921	1.14869	1.08593	1.0784	1.06761	1.03842	1.02448	0.975102	0.944709	0.856265	0.767144	0.725803	0.726489	0.711085	0.681982	0.638667	0.674782	0.656792	0.638538	0.657077	0.675183	0.679636	0.691893	0.645715	0.638819	0.627846	0.655778	0.617078	0.660428	0.686177	0.65007	0.696553	0.743735	0.764646	0.782503	0.771597	0.802536
chr19:Lcor		1.24723	1.24723	1.24723	1.24723	1.24723	1.24723	1.3203	1.3481	1.22659	1.1065	1.0668	1.04657	1.00999	0.932907	0.843985	0.904557	0.833187	0.783917	0.748459	0.722475	0.816542	0.791388	0.748961	0.781741	0.682789	0.698792	0.655172	0.701618	0.706292	0.658989	0.788686	0.761347	0.74897	0.806051	0.782335	0.861493	0.803502	0.767728	0.763637	0.74161	0.73235	0.73152	0.761737	0.814098	0.899544	0.905929	0.935941	1.01371
chr10:Map7		1.2466	1.2466	1.2466	1.2466	1.2466	1.2466	1.26748	1.31588	1.40334	1.41127	1.45682	1.37828	1.33233	1.31139	1.39553	1.38745	1.22203	1.12944	1.04823	0.920266	0.828018	0.682562	0.551337	0.504016	0.39251	0.308057	0.294921	0.283697	0.423978	0.399659	0.449073	0.519069	0.535253	0.655061	0.819267	0.904679	0.90808	0.981375	0.985058	0.837041	0.917649	0.962299	0.946871	0.998249	0.916197	0.721643	0.768666	0.730399
chr11:Pex13		1.24645	1.24645	1.24645	1.24645	1.24645	1.24645	1.37624	1.38977	1.39073	1.5	1.5	1.5	1.5	1.5	1.5	1.49867	1.34074	1.18854	1.19514	1.14815	0.981621	0.762693	0.739858	0.541388	0.536529	0.357954	0.348128	0.372517	0.389308	0.441186	0.527861	0.557331	0.664856	0.471445	0.622449	0.617086	0.655628	0.655717	0.554332	0.609946	0.649514	0.728291	0.591152	0.512569	0.683707	0.799234	0.60738	0.603583
chr15:Syt10		1.2464	1.2464	1.2464	1.2464	1.2464	1.2464	1.28761	1.3432	1.36539	1.37994	1.49768	1.5	1.5	1.5	1.5	1.5	1.42649	1.30121	1.11894	0.980156	0.821749	0.644236	0.523652	0.445378	0.268004	0.203986	0.0858745	0.00684293	0.0930809	0.135612	0.132655	0.230293	0.219084	0.23422	0.230746	0.4008	0.498177	0.548665	0.681692	0.621673	0.630168	0.616567	0.655848	0.65595	0.664723	0.662317	0.434034	0.383702
chr1:Rims1		1.24557	1.24557	1.24557	1.24557	1.24557	1.24557	1.22306	1.2193	1.20996	1.2356	1.19658	1.11703	1.1079	1.10577	1.07533	1.06608	1.0716	1.11618	1.13955	1.11101	1.05054	1.03804	1.03436	0.975019	0.962277	0.957073	0.923618	0.887205	0.877431	0.823007	0.797332	0.803974	0.782575	0.732947	0.716198	0.688323	0.688128	0.676876	0.700584	0.627078	0.632239	0.619869	0.618979	0.571615	0.622408	0.633646	0.677076	0.68819
chr3:Kirrel		1.24538	1.24538	1.24538	1.24538	1.24538	1.24538	1.28742	1.24293	1.2688	1.28127	1.18157	1.15419	1.15745	1.07875	1.08125	1.06418	0.998458	0.931476	0.893186	0.772952	0.735431	0.760181	0.70344	0.665851	0.710121	0.705951	0.688605	0.749062	0.773372	0.699094	0.718024	0.808704	0.766304	0.782006	0.751251	0.778645	0.828493	0.80494	0.823133	0.855258	0.927743	0.970144	0.903336	0.990064	1.02951	1.04409	0.934206	0.839819
chr4:Atp6v0b		1.24399	1.24399	1.24399	1.24399	1.24399	1.24399	1.24261	1.24896	1.2597	1.21312	1.16744	1.13916	1.18676	1.20225	1.16102	1.14872	1.14311	1.14179	1.07651	1.03114	1.0191	0.994097	1.08555	1.01134	0.968659	0.970152	0.9255	0.845813	0.771422	0.781204	0.816809	0.811646	0.885821	0.766285	0.767294	0.805715	0.918439	0.89146	0.836661	0.89403	0.874622	0.794543	0.679118	0.578292	0.58217	0.506004	0.391006	0.219535
chr3:Adgrl2		1.24255	1.24255	1.24255	1.24255	1.24255	1.24255	1.22875	1.32746	1.5	1.5	1.36282	1.46591	1.2824	1.31458	1.34315	1.41784	1.27286	1.40135	1.32201	0.984298	0.818712	0.707572	0.40878	0.418983	0.160169	0.0452831	-0.210076	-0.196927	-0.211278	-0.40937	-0.36996	-0.266291	-0.105366	-0.0208612	0.162076	0.446222	0.611146	0.772024	0.919943	0.679113	0.762842	0.742407	0.660301	0.440041	0.748329	0.693877	0.61939	0.60187
chr9:Neo1		1.24177	1.24177	1.24177	1.24177	1.24177	1.24177	1.3036	1.31051	1.29329	1.29304	1.30103	1.28971	1.31788	1.31981	1.32789	1.28655	1.23647	1.16467	1.12037	1.09137	1.02798	0.968716	0.891609	0.849629	0.804179	0.788011	0.768503	0.731672	0.72959	0.718978	0.713164	0.737292	0.769996	0.823912	0.826677	0.813797	0.828982	0.850503	0.829777	0.831723	0.801	0.750964	0.724117	0.687906	0.632189	0.615382	0.597192	0.53994
chr9:Ctdspl		1.24067	1.24067	1.24067	1.24067	1.24067	1.24067	1.28476	1.26365	1.30482	1.3634	1.32429	1.27682	1.21357	1.28048	1.29	1.21093	1.06533	0.938425	0.87773	0.706057	0.651208	0.527922	0.519576	0.453334	0.303068	0.139757	0.159001	0.202142	0.22024	0.217532	0.291645	0.315843	0.490714	0.536442	0.567243	0.673313	0.868751	0.898233	0.981056	1.01121	1.03417	1.13835	1.16475	1.18202	1.11635	1.15076	1.10449	0.960762
chr10:Ikbip		1.24059	1.24059	1.24059	1.24059	1.24059	1.24059	1.25036	1.24945	1.23966	1.2188	1.26913	1.27074	1.23881	1.20018	1.12896	1.12514	1.08838	1.12118	1.08452	1.06076	1.09113	1.0566	1.04011	0.960391	0.941366	0.921105	0.848806	0.763413	0.704113	0.709981	0.690221	0.655554	0.62399	0.645104	0.694964	0.711192	0.722217	0.73088	0.795755	0.80396	0.769569	0.809304	0.794487	0.771977	0.744522	0.667103	0.631036	0.619196
chr2:Epc2		1.23931	1.23931	1.23931	1.23931	1.23931	1.23931	1.21969	1.1317	1.2668	1.4254	1.5	1.5	1.42858	1.49864	1.5	1.5	1.5	1.45027	1.44878	1.35479	0.945768	0.567106	0.352965	0.329136	0.0641443	-0.218841	-0.39105	-0.401433	-0.337001	-0.33229	-0.290984	-0.248373	0.0796429	0.400234	0.362136	0.374506	0.590442	0.602039	0.696974	0.630555	0.661408	0.688059	0.815205	0.744702	0.574884	0.635289	0.60464	0.806522
chr14:Glt8d1		1.23931	1.23931	1.23931	1.23931	1.23931	1.23931	1.25779	1.42459	1.5	1.5	1.5	1.5	1.5	1.5	1.5	1.5	1.5	1.5	1.40148	1.22875	1.07372	0.942345	0.858613	0.850287	0.759478	0.635054	0.509551	0.38144	0.451916	0.544819	0.55388	0.500787	0.461033	0.517944	0.407001	0.469989	0.578976	0.710686	0.724392	0.626821	0.569958	0.548897	0.431252	0.469257	0.474128	0.539353	0.318545	0.308934
chr9:Nptn		1.23906	1.23906	1.23906	1.23906	1.23906	1.23906	1.38174	1.34499	1.44908	1.44551	1.38859	1.31146	1.09269	1.02317	0.989194	1.04222	1.21629	1.13871	1.27684	1.22113	0.954319	0.722368	0.648428	0.732888	0.679899	0.712985	0.50583	0.392709	0.159441	-0.110707	-0.161557	0.0437607	0.293594	0.305684	0.19043	0.147584	0.0786489	0.386695	0.505754	0.685944	0.850397	0.775126	0.592015	0.505115	0.55821	0.682187	0.789254	0.837334
chr4:Fsd1l		1.23851	1.23851	1.23851	1.23851	1.23851	1.23851	1.1999	1.18763	1.22305	1.16798	1.19835	1.22785	1.21837	1.26737	1.25712	1.20102	1.26522	1.27398	1.17842	1.1215	1.09909	0.952174	0.946445	0.847989	0.804519	0.759887	0.9164	0.804055	0.814156	0.875259	0.879292	0.848904	0.913025	0.90145	0.889463	0.869827	0.82589	0.670101	0.736312	0.590051	0.554632	0.493278	0.457647	0.491667	0.528432	0.521152	0.497477	0.623033
chr5:Fry		1.23802	1.23802	1.23802	1.23802	1.23802	1.23802	1.09153	1.12755	1.1413	1.18774	1.15398	0.966804	0.947916	1.07365	0.964855	0.948137	0.888358	0.940608	0.902392	0.911396	0.866315	0.843039	0.902018	0.898164	0.793299	0.814957	0.76528	0.874507	0.942551	0.913405	0.857764	0.710323	0.749159	0.654249	0.720462	0.673989	0.6774	0.79519	0.732506	0.580435	0.638395	0.626626	0.650493	0.573739	0.770907	0.673944	0.77316	0.730858
chr5:Atxn2		1.23783	1.23783	1.23783	1.23783	1.23783	1.23783	1.41084	1.38644	0.905169	1.00088	0.894258	0.813634	0.888037	0.753024	0.716656	0.704097	0.617217	0.40994	0.507748	0.482242	0.440476	0.444622	0.299137	0.107777	-0.121929	-0.451641	-0.550658	-0.49612	-0.450661	-0.579057	-0.579393	-0.887205	-0.979718	-0.770895	-0.687039	-0.355595	-0.187032	-0.176858	-0.180548	-0.12041	-0.107608	0.141233	0.335439	0.39563	0.105748	-0.160148	-0.37471	-0.483435
chr14:Pebp4		1.23631	1.23631	1.23631	1.23631	1.23631	1.23631	1.18869	1.22272	1.14499	1.15309	1.10271	1.06849	1.09114	1.16087	1.09991	1.00965	1.06722	0.960633	0.919605	1.01205	0.932445	0.839357	0.798015	0.829346	0.69761	0.681526	0.823969	0.794553	0.788161	0.742479	0.639482	0.70173	0.773739	0.766866	0.692807	0.779307	0.760401	0.679635	0.678559	0.689676	0.760479	0.724017	0.818501	0.83791	0.861021	0.902039	0.905669	1.02857
chr2:Celf2		1.23614	1.23614	1.23614	1.23614	1.23614	1.23614	1.26906	1.27765	1.33526	1.28721	1.32636	1.32361	1.29989	1.21494	1.3103	1.30552	1.30741	1.20903	1.15953	1.01299	0.877399	0.839202	0.713916	0.625862	0.570597	0.442195	0.397137	0.391005	0.411986	0.36196	0.432511	0.495401	0.489446	0.582468	0.632346	0.651864	0.664248	0.678829	0.683734	0.724936	0.727111	0.710624	0.691116	0.684773	0.725125	0.794875	0.827513	0.856515
chrX:Nhs		1.23395	1.23395	1.23395	1.23395	1.23395	1.23395	1.20597	1.09414	1.1262	1.19022	1.22507	1.11361	1.15335	1.1196	1.10637	1.00476	0.894507	0.833665	0.804591	0.733843	0.6407	0.546499	0.461029	0.371935	0.281565	0.222793	0.282407	0.329031	0.368153	0.408303	0.429193	0.418915	0.469891	0.630083	0.612847	0.69535	0.827955	0.863433	0.908415	0.977431	1.03935	1.05438	1.02083	1.10619	1.05999	1.1077	1.14222	1.03562
chr4:Reck		1.23179	1.23179	1.23179	1.23179	1.23179	1.23179	1.2535	1.35346	1.38224	1.43754	1.43306	1.42325	1.42271	1.3598	1.32097	1.2597	1.22225	1.18289	1.0132	0.891182	0.740592	0.637341	0.503477	0.393482	0.39382	0.28608	0.230916	0.152113	0.154108	0.197179	0.320734	0.429172	0.505491	0.61795	0.6586	0.695435	0.792744	0.881933	0.967401	0.961835	0.984245	0.912501	0.85458	0.850962	0.802384	0.800605	0.730533	0.68653
chr7:Tead1		1.2312	1.2312	1.2312	1.2312	1.2312	1.2312	1.32315	1.3538	1.16246	1.07481	1.10875	1.00481	1.2084	0.805896	1.01255	0.904346	0.72565	0.755413	0.701283	0.813621	0.877074	0.699847	0.573612	0.287578	0.262893	-0.166931	-0.102173	-0.0287951	-0.0711233	-0.00185066	0.0972227	0.0028031	0.155621	0.257826	0.24033	0.570979	0.846653	0.829077	0.811096	0.856753	0.981068	0.858789	0.990589	0.788113	0.697101	0.676866	0.713216	0.639614
chr1:Ptpn4		1.23117	1.23117	1.23117	1.23117	1.23117	1.23117	1.1337	1.26162	1.28113	1.41805	1.37248	1.33882	1.27269	1.27431	1.16605	1.19372	1.10423	1.11788	0.944538	0.812554	0.581537	0.507741	0.346611	0.208123	0.0264309	-0.0702935	-0.238174	-0.203026	-0.251203	-0.124388	-0.157621	-0.0856273	0.0396185	0.0687109	0.23676	0.424782	0.370319	0.489943	0.61502	0.791899	0.808811	1.03368	1.07737	1.14834	1.30138	1.15606	1.17077	1.25885
chr1:Ppp1r12b		1.23111	1.23111	1.23111	1.23111	1.23111	1.23111	1.17933	1.42714	1.49512	1.5	1.5	1.5	1.5	1.48616	1.45997	1.4559	1.20796	1.1444	0.921046	0.859618	0.861138	0.813542	0.778323	0.624376	0.533082	0.459375	0.346706	0.263972	0.19887	0.169373	0.218506	0.292035	0.323947	0.246535	0.322763	0.47213	0.534595	0.60437	0.799954	0.94298	0.798662	0.739061	0.797382	0.790887	1.02285	1.02695	1.08286	0.992835
chr17:Arhgap28		1.22999	1.22999	1.22999	1.22999	1.22999	1.22999	1.20914	1.15595	0.999385	1.03305	0.917305	0.94181	0.885789	0.97079	1.03196	1.08058	1.2713	1.24659	1.19071	1.2218	1.1303	1.2334	1.16365	1.12605	1.00223	0.981098	0.777605	0.669154	0.793745	0.851311	0.979719	0.96281	0.83286	0.827249	0.848426	0.887768	0.880511	1.02571	1.02795	0.822121	0.789804	0.64381	0.569878	0.645198	0.557363	0.496511	0.489496	0.460595
chr17:Fbxl17		1.2291	1.2291	1.2291	1.2291	1.2291	1.2291	1.13105	1.02198	0.992178	1.37525	1.268	1.22859	1.24205	1.41577	1.43689	1.3864	1.20579	1.1178	1.06313	0.858366	0.418388	0.304567	0.0329197	-0.0726548	-0.20253	-0.273225	-0.425327	-0.348677	-0.290108	-0.214998	0.0151299	0.023536	0.256351	0.621247	0.630143	0.692912	0.715049	0.840541	0.876433	1.03507	1.07366	1.08584	1.2599	1.1891	1.10625	1.3314	1.48828	1.40149
chr2:Rbm39		1.22815	1.22815	1.22815	1.22815	1.22815	1.22815	1.445	1.42892	1.45407	1.4155	1.40056	1.38349	1.30234	1.19294	1.22452	1.17367	0.952045	0.754832	0.56496	0.392418	0.227464	0.0261349	-0.0667946	-0.105371	-0.274788	-0.374915	-0.425596	-0.39104	-0.296181	-0.0898849	-0.110783	-0.0986943	-0.00478481	0.223327	0.30024	0.491974	0.408068	0.514076	0.401066	0.416812	0.451104	0.530693	0.667582	0.572283	0.269788	0.191043	0.0181286	-0.0680857
chr9:Atp2c1		1.22761	1.22761	1.22761	1.22761	1.22761	1.22761	1.34019	1.3008	1.12694	1.0926	1.12346	1.06384	0.89973	0.796574	0.743418	0.849594	0.886509	0.834473	0.726038	0.827377	0.876554	1.05606	0.985578	0.994995	1.00071	1.02743	0.804968	0.718615	0.720504	0.824866	0.883783	0.807698	0.593402	0.589825	0.52915	0.562645	0.547868	0.651804	0.640137	0.643266	0.680669	0.617588	0.644765	0.707206	0.732975	0.843882	0.858271	0.790318
chr16:Dyrk1a		1.22748	1.22748	1.22748	1.22748	1.22748	1.22748	1.1362	1.128	1.34121	1.5	1.5	1.5	1.5	1.5	1.5	1.46196	1.44764	1.34803	1.05839	0.786531	0.514405	0.378604	0.242825	0.114024	0.0972062	-0.144316	-0.102249	-0.100407	-0.118686	-0.0486911	-0.000999176	0.134176	0.136207	0.251822	0.412399	0.532798	0.607732	0.528146	0.748934	0.835176	1.05757	1.02046	1.10306	1.12907	1.17457	1.08217	1.07172	1.05
chr1:Epha4		1.22577	1.22577	1.22577	1.22577	1.22577	1.22577	1.26402	1.20262	1.19904	1.18825	1.20167	1.23053	1.2211	1.20714	1.16588	1.16691	1.14472	1.11379	1.1185	1.04483	1.01533	0.977017	0.932932	0.91123	0.844384	0.81855	0.789302	0.743702	0.725837	0.725153	0.714256	0.700662	0.708397	0.693281	0.693526	0.729052	0.733353	0.758347	0.763497	0.754283	0.743081	0.732371	0.702421	0.64953	0.662039	0.641986	0.654347	0.657999
chr8:Palld		1.22562	1.22562	1.22562	1.22562	1.22562	1.22562	1.11716	1.09145	0.961668	0.898083	0.860036	0.715116	0.754514	0.816304	0.803775	0.831222	0.861645	0.900027	0.985271	1.04021	0.976106	0.929831	1.03556	1.06248	0.934352	0.849877	0.9044	0.937707	1.03864	1.05588	1.07593	1.04594	1.07307	0.925113	0.885882	0.944822	0.927122	0.888701	0.869668	0.766245	0.704784	0.706383	0.679029	0.698811	0.783785	0.77353	0.687592	0.744866
chr8:Cdh11		1.22378	1.22378	1.22378	1.22378	1.22378	1.22378	1.32136	1.36103	1.14215	1.05391	1.04745	0.949029	0.960315	1.0518	0.98279	1.06406	1.11331	1.07091	1.04242	1.03926	0.983549	0.898788	0.878638	0.787617	0.660249	0.718583	0.558013	0.510113	0.508227	0.455699	0.480132	0.334725	0.27765	0.273891	0.175249	0.238775	0.131107	0.144084	0.0395012	-0.0342693	-0.0587484	-0.146312	-0.00381564	-0.0192503	0.0585153	0.137976	0.104806	0.168766
chr4:Ror1		1.2222	1.2222	1.2222	1.2222	1.2222	1.2222	1.24086	1.25007	1.10807	1.29693	1.34706	1.34588	1.31672	1.36521	1.32081	1.32246	1.2217	1.11112	0.970713	0.894153	0.619503	0.44605	0.257835	0.146344	-0.0220792	-0.103614	-0.155444	-0.250604	-0.179498	-0.194298	-0.0808945	-0.0127547	0.0816195	0.303734	0.411722	0.61484	0.667541	0.68954	0.83952	0.893437	0.977136	1.01906	1.15564	1.24118	1.17116	1.16809	1.07029	1.01915
chr9:Trak1		1.22198	1.22198	1.22198	1.22198	1.22198	1.22198	1.20283	1.18817	1.16301	1.09721	1.00749	1.0378	1.03067	0.823172	0.772408	0.789772	0.936115	0.947049	0.901182	0.833417	0.747127	0.729506	0.558767	0.435308	0.517072	0.500385	0.413979	0.355279	0.282483	0.345804	0.354071	0.452067	0.440102	0.318527	0.413234	0.437683	0.519193	0.561626	0.6382	0.836619	1.0364	1.12053	1.09929	1.20714	1.3964	1.4078	1.37392	1.35206
chr9:Pcolce2		1.22106	1.22106	1.22106	1.22106	1.22106	1.22106	1.30679	1.25218	1.27723	1.26635	1.29417	1.3154	1.29222	1.32371	1.24606	1.21967	1.25952	1.15399	1.12693	1.03406	1.05248	0.908372	0.79911	0.728372	0.647366	0.636754	0.673277	0.573273	0.561692	0.555213	0.5253	0.44959	0.481609	0.481304	0.532286	0.645972	0.630246	0.584369	0.676164	0.70851	0.680948	0.70383	0.78562	0.768564	0.812706	0.782084	0.666383	0.614133
chr8:Cdh13		1.22044	1.22044	1.22044	1.22044	1.22044	1.22044	1.17471	1.07796	1.05826	0.977792	0.990855	1.02047	1.00378	0.993102	0.955889	0.970805	1.0173	0.962429	1.05327	1.04113	1.14437	1.11838	1.03342	0.995818	1.01483	1.05493	1.05303	0.991499	1.02093	0.975636	0.954513	0.902293	0.860903	0.873513	0.891958	0.844865	0.812606	0.826221	0.810346	0.787314	0.746065	0.675037	0.682906	0.698913	0.686273	0.62987	0.631164	0.593214
chr15:Nipbl		1.22004	1.22004	1.22004	1.22004	1.22004	1.22004	1.24346	1.20993	1.32188	1.32524	1.16878	1.11548	1.048	1.01536	1.08113	0.978736	0.85636	0.724929	0.725013	0.61027	0.366807	0.362559	0.215263	0.0970503	-0.136598	-0.268104	-0.361949	-0.385844	-0.2058	-0.269611	-0.33318	-0.137997	-0.194991	-0.127504	0.0357529	0.339584	0.438653	0.63459	0.806636	0.73246	0.759873	0.892017	0.889545	1.1288	1.13765	1.16407	1.01176	0.883559
chr6:Ninj2		1.21983	1.21983	1.21983	1.21983	1.21983	1.21983	1.10108	1.01776	0.75852	0.947151	0.919714	1.01428	0.884829	0.973779	0.799021	0.915873	0.832848	0.754074	0.839796	0.946918	0.931248	0.915123	0.830751	0.800613	0.728461	0.829706	0.580088	0.565561	0.644304	0.561071	0.577991	0.319116	0.285294	0.164646	0.260907	0.085326	-0.0206846	0.171369	0.168515	0.240778	0.225563	0.125116	0.215089	0.372427	0.481345	0.425931	0.473568	0.422833
chr19:Tcf7l2	Y	1.21941	1.21941	1.21941	1.21941	1.21941	1.21941	1.1863	1.13956	1.10004	1.08948	1.08328	1.02299	1.01837	0.937352	0.946992	0.997962	0.922799	0.923199	0.917203	0.889757	0.837805	0.782851	0.776012	0.74303	0.73941	0.731957	0.706313	0.725246	0.714389	0.726707	0.714839	0.699473	0.733891	0.747429	0.761922	0.804328	0.793466	0.791374	0.83304	0.828346	0.84903	0.897307	0.902987	0.912172	0.874796	0.837332	0.804055	0.80402
chr11:Stac2		1.21862	1.21862	1.21862	1.21862	1.21862	1.21862	1.17301	1.06952	1.01549	1.00098	1.0309	0.966808	0.865588	0.537105	0.333929	0.280895	0.323506	0.422956	0.338169	0.467793	0.419657	0.514012	0.581792	0.635635	0.771458	1.00494	1.12185	1.12605	1.03449	1.12702	1.15822	1.19566	1.18938	1.0772	1.06637	1.16718	1.02903	0.882429	0.940742	1.01115	0.914372	0.814873	0.735929	0.610549	0.682944	0.610556	0.477404	0.663176
chr5:Ptpn12		1.21784	1.21784	1.21784	1.21784	1.21784	1.21784	1.2306	1.21109	1.16371	0.979666	0.81127	0.663308	0.674983	0.675816	0.770033	0.966344	0.870674	0.640409	0.595302	0.572261	0.586029	0.585936	0.589694	0.383448	0.424205	0.441871	0.323168	0.228513	0.439524	0.281135	0.101157	0.23214	0.315381	0.5082	0.836278	0.859685	0.771529	0.785357	0.933035	0.811808	0.870186	1.13351	1.10952	1.26331	1.12347	0.918949	0.977208	0.962949
chr1:Prrc2c		1.2168	1.2168	1.2168	1.2168	1.2168	1.2168	1.17768	1.04887	1.21129	1.12102	1.15716	1.28585	1.20355	1.02996	0.978847	0.838659	0.746271	0.72561	0.64528	0.443596	0.327355	0.229837	0.0302232	0.185289	0.07659	0.0256798	0.101647	0.224191	0.382568	0.422154	0.611231	0.872816	0.860988	0.96512	1.00918	1.14555	1.16555	1.13956	1.14327	1.14778	1.19481	1.18072	1.08771	1.10678	1.14713	1.18866	1.14983	1.1435
chr3:Unc5c		1.21671	1.21671	1.21671	1.21671	1.21671	1.21671	1.29045	1.2506	1.2738	1.34663	1.32988	1.28966	1.39234	1.23743	1.2386	1.21987	1.17872	1.08075	1.07174	0.986857	0.840041	0.750398	0.74268	0.65504	0.695719	0.640305	0.643401	0.653839	0.646114	0.652856	0.614196	0.602142	0.624484	0.632241	0.635271	0.597607	0.582083	0.574046	0.541474	0.561796	0.547462	0.586419	0.594427	0.617937	0.61782	0.610413	0.697811	0.783192
chr5:Ldb2		1.2165	1.2165	1.2165	1.2165	1.2165	1.2165	1.18201	1.22464	1.26037	1.30232	1.31619	1.27814	1.26973	1.25161	1.25789	1.21644	1.1372	1.13326	1.06011	0.981468	0.924217	0.830468	0.762344	0.711082	0.642419	0.629492	0.593952	0.621106	0.629207	0.581259	0.578911	0.572351	0.662347	0.697676	0.693271	0.740941	0.762356	0.835213	0.845928	0.835112	0.932706	0.938981	0.931159	0.861844	0.869878	0.794423	0.677461	0.655961
chr7:Lair1		1.21465	1.21465	1.21465	1.21465	1.21465	1.21465	1.25753	1.27028	1.18835	1.13275	1.16625	1.18839	1.25172	1.09814	1.08191	1.01461	1.10015	1.17119	1.08308	1.13653	1.09536	1.10198	1.08055	0.972336	0.879108	0.77345	0.754864	0.71903	0.687046	0.674166	0.55816	0.52453	0.530197	0.544143	0.595866	0.733311	0.720155	0.707007	0.610168	0.654411	0.653345	0.747042	0.746161	0.721775	0.636578	0.663926	0.628905	0.756428
chr11:D630024D03Rik		1.21444	1.21444	1.21444	1.21444	1.21444	1.21444	1.24123	1.25479	1.28216	1.2645	1.34066	1.39016	1.3554	1.3381	1.32868	1.30374	1.31192	1.17039	1.05582	0.963375	0.854202	0.833426	0.6281	0.622269	0.550556	0.532454	0.443574	0.410279	0.476093	0.508458	0.565192	0.635523	0.581091	0.635721	0.629392	0.740169	0.761109	0.810139	0.776826	0.791025	0.888927	0.853628	0.880945	0.885095	0.852382	0.856656	0.727359	0.681179
chr13:Spock1		1.21397	1.21397	1.21397	1.21397	1.21397	1.21397	1.1974	1.23563	1.21925	1.21647	1.13679	1.0624	0.969559	0.917971	0.865395	0.796173	0.855165	0.866025	0.825181	0.804598	0.741082	0.778859	0.948847	1.01582	1.04479	1.1132	1.12064	1.06207	1.04491	1.08948	1.02908	1.06761	0.982705	0.902558	0.802864	0.738177	0.731155	0.709024	0.714499	0.694649	0.673528	0.650782	0.668429	0.680473	0.671293	0.732353	0.757823	0.769789
chr3:Cdc14a		1.21385	1.21385	1.21385	1.21385	1.21385	1.21385	1.25695	1.24082	1.20243	1.24593	1.19815	1.13397	1.04611	1.06315	1.06442	1.10194	1.08562	1.03331	0.948225	0.865753	0.753521	0.678056	0.613961	0.590207	0.509956	0.472695	0.405269	0.383825	0.373019	0.379969	0.42488	0.500269	0.550169	0.602721	0.641672	0.657221	0.704549	0.734262	0.774197	0.793805	0.854888	0.860249	0.818914	0.832145	0.823645	0.803314	0.823433	0.815003
chr19:Pcsk5		1.21374	1.21374	1.21374	1.21374	1.21374	1.21374	1.23395	1.31246	1.27032	1.00274	0.919197	0.899288	1.05124	1.02084	1.09232	1.21665	1.11235	1.18647	1.06397	1.02849	1.15137	1.1884	1.32085	1.06925	1.11946	1.08799	1.04779	0.988187	0.951509	0.863308	0.776519	0.552732	0.478192	0.354593	0.425725	0.266907	0.217699	0.105596	0.131209	-0.0331529	-0.129666	-0.162025	-0.0402493	-0.184981	-0.139109	-0.19088	-0.146359	-0.204765
chr12:Mdga2		1.2122	1.2122	1.2122	1.2122	1.2122	1.2122	1.27817	1.22223	1.25415	1.38805	1.40095	1.40862	1.41337	1.30223	1.32065	1.17265	0.929849	0.810227	0.646961	0.483002	0.329124	0.0698496	-0.10126	-0.194305	-0.281322	-0.383417	-0.449365	-0.399198	-0.256776	-0.255677	-0.24212	-0.195012	-0.0991203	-0.0224354	0.0716253	0.208574	0.416229	0.589295	0.679977	0.677219	0.785592	0.906827	1.02419	1.10908	1.16214	1.27343	1.34838	1.20365
chr2:Ptpra		1.21121	1.21121	1.21121	1.21121	1.21121	1.21121	1.2396	1.25165	1.14854	1.12466	1.22049	1.20931	1.19643	1.15682	1.1525	1.20518	1.25516	1.20645	1.1542	1.13451	1.16347	1.06716	0.962408	0.939597	0.849591	0.827863	0.722453	0.723751	0.713308	0.671951	0.634971	0.602749	0.597092	0.577527	0.619104	0.6826	0.646878	0.724433	0.636731	0.604974	0.646074	0.694675	0.665464	0.72791	0.724076	0.752086	0.722312	0.700728
chr11:Ugp2		1.21113	1.21113	1.21113	1.21113	1.21113	1.21113	1.15897	1.19499	1.21042	1.25058	1.25677	1.07009	1.07981	1.06926	0.985307	0.964387	0.955935	1.02947	1.03995	0.94216	0.826671	0.815497	0.83192	0.663364	0.624737	0.663815	0.610855	0.458627	0.347903	0.306187	0.323494	0.346229	0.23522	0.282934	0.293719	0.236935	0.21499	0.229944	0.367621	0.411996	0.459228	0.523682	0.421296	0.495746	0.544081	0.616382	0.880883	0.942304
chr4:Cntfr		1.211	1.211	1.211	1.211	1.211	1.211	1.18558	1.15837	1.12865	1.04834	1.02532	1.01573	1.0409	1.01336	1.0178	1.00981	1.02321	0.952955	0.90133	0.857996	0.865782	0.835747	0.812932	0.763614	0.758959	0.711995	0.689791	0.679178	0.71496	0.729316	0.71423	0.635124	0.674448	0.697222	0.7288	0.803214	0.818911	0.90023	0.898997	0.900623	0.890632	0.871541	0.943786	0.929194	0.847407	0.789001	0.687301	0.709241
chr2:Plcb4		1.21063	1.21063	1.21063	1.21063	1.21063	1.21063	1.24722	1.12201	1.11415	1.14695	1.08653	1.074	1.11417	1.09578	1.13527	0.941241	1.0096	0.935464	0.806888	0.68027	0.561355	0.44228	0.344878	0.273454	0.177405	0.0409338	0.101396	0.0645164	0.10687	0.0929917	0.0822322	0.140255	0.205166	0.287855	0.352445	0.39459	0.433731	0.423832	0.551984	0.642209	0.704783	0.784527	0.783023	0.894654	0.852704	0.832027	0.869979	0.757642
chrX:6030498E09Rik		1.20999	1.20999	1.20999	1.20999	1.20999	1.20999	1.13326	1.14905	1.13704	1.14625	1.07949	1.02555	1.01803	0.971732	1.05759	1.08684	1.08955	1.17891	1.20651	1.24372	1.19366	1.32984	1.33956	1.24072	1.21723	1.21266	1.26019	1.28753	1.24346	1.13583	0.993222	0.992816	0.806649	0.777134	0.799948	0.661287	0.630545	0.555542	0.658178	0.557206	0.511755	0.479856	0.429352	0.456567	0.482482	0.488336	0.53625	0.47307
chr12:Nrcam		1.20972	1.20972	1.20972	1.20972	1.20972	1.20972	1.21542	1.16074	1.18614	1.20965	1.21881	1.21724	1.20593	1.16491	1.11785	1.11095	1.03916	0.97331	1.0057	0.915179	0.80415	0.723466	0.629233	0.545786	0.50715	0.512137	0.482582	0.477046	0.532344	0.513373	0.528639	0.581388	0.626927	0.676424	0.707448	0.772356	0.833698	0.852568	0.906514	0.91374	0.924859	0.94109	0.949411	0.941418	0.93162	0.936691	0.871775	0.803617
chr12:Atad2b		1.20949	1.20949	1.20949	1.20949	1.20949	1.20949	1.24128	1.18082	1.21765	1.18552	1.15838	1.35925	1.40902	1.48274	1.49765	1.47723	1.5	1.48148	1.4686	1.35595	1.28064	1.0891	0.907226	0.727611	0.64572	0.563842	0.414871	0.33521	0.321748	0.340861	0.356802	0.386554	0.520028	0.607177	0.703327	0.770874	0.807711	0.920687	0.942828	0.930199	0.920198	0.854677	0.881856	0.87537	0.788436	0.71489	0.596915	0.565258
chr1:Gulp1		1.20943	1.20943	1.20943	1.20943	1.20943	1.20943	1.18752	1.26168	1.23415	1.24792	1.28397	1.20913	1.12984	1.04111	1.06151	1.08241	1.04473	0.96096	0.840221	0.824406	0.729129	0.587465	0.50188	0.464647	0.43069	0.446028	0.396251	0.383648	0.421481	0.445537	0.44818	0.469403	0.506189	0.617848	0.730105	0.776048	0.802829	0.877173	0.966757	0.962373	0.943709	0.891066	0.835584	0.857426	0.804341	0.799288	0.721859	0.645586
chrX:Sms		1.20924	1.20924	1.20924	1.20924	1.20924	1.20924	1.00072	0.921895	0.887256	0.817881	0.820466	0.770897	0.777203	0.792797	0.819575	0.813893	0.834837	0.868974	0.935751	1.01839	1.05645	1.01215	1.04578	1.08535	1.11551	1.01771	0.936098	0.833522	0.849877	0.863426	0.912701	0.87433	0.915671	0.894835	0.8902	0.873873	0.737138	0.722863	0.793813	0.913584	0.812429	0.688456	0.652266	0.559581	0.606146	0.650599	0.717833	0.871158
chr1:Rgl1		1.209	1.209	1.209	1.209	1.209	1.209	1.12796	1.0486	0.907995	1.00374	1.13662	1.14929	1.04848	0.993637	0.89451	0.802653	0.648599	0.645991	0.647829	0.821885	0.767365	0.600677	0.505802	0.550427	0.432095	0.448575	0.418116	0.485879	0.536795	0.539594	0.441495	0.458966	0.517307	0.591899	0.53033	0.639982	0.583589	0.661984	0.648865	0.554692	0.465708	0.346952	0.364581	0.400443	0.33164	0.318156	0.287117	0.330067
chr15:Cdh10		1.20878	1.20878	1.20878	1.20878	1.20878	1.20878	1.22564	1.25205	1.28588	1.3327	1.33583	1.42649	1.45133	1.46927	1.49584	1.42596	1.33765	1.26793	1.19857	1.08487	0.931587	0.806015	0.611794	0.51479	0.404571	0.285161	0.307443	0.264811	0.256188	0.215274	0.258687	0.278637	0.387473	0.507011	0.56522	0.671947	0.752353	0.792307	0.815511	0.897241	1.05759	1.03557	1.10226	1.02528	0.969737	0.949756	0.845797	0.778076
chr10:Tmtc2		1.20738	1.20738	1.20738	1.20738	1.20738	1.20738	1.25252	1.24325	1.29184	1.36531	1.39168	1.39401	1.45713	1.47793	1.46022	1.43513	1.35947	1.28048	1.21221	1.08472	0.943054	0.823933	0.692111	0.577048	0.458101	0.400898	0.321958	0.285902	0.274065	0.27164	0.308293	0.35363	0.428203	0.523651	0.565969	0.612693	0.660876	0.723663	0.772032	0.818849	0.893665	0.907019	0.949459	0.925332	0.906807	0.920754	0.891616	0.847303
chr6:Antxr1		1.20674	1.20674	1.20674	1.20674	1.20674	1.20674	1.19232	1.13476	1.0933	1.08903	1.08263	1.13976	1.07688	1.04995	1.05534	1.01085	0.985362	0.965023	0.970054	0.900532	0.869384	0.852414	0.795697	0.8068	0.807067	0.785348	0.780347	0.784269	0.769088	0.789208	0.838438	0.8335	0.855441	0.873323	0.854235	0.870052	0.851076	0.878315	0.886612	0.873559	0.820444	0.763473	0.750798	0.701558	0.66596	0.707631	0.652595	0.666242
chr3:Tmem56		1.20587	1.20587	1.20587	1.20587	1.20587	1.20587	1.09576	1.12569	1.12431	1.30298	1.22864	1.18927	1.12372	0.949705	0.79213	0.841876	0.953438	1.07226	1.05113	1.16824	0.931581	0.928933	0.827074	0.700456	0.731914	0.715877	0.53101	0.384332	0.382013	0.257908	0.0926774	0.0617942	0.0936519	0.200026	0.291186	0.147843	0.170777	0.311974	0.382516	0.336715	0.281749	0.340401	0.418569	0.308366	0.28489	0.376513	0.550829	0.582502
chr19:Ppp6r3		1.2056	1.2056	1.2056	1.2056	1.2056	1.2056	1.19174	1.13066	1.26532	1.18447	1.08244	1.09793	1.35365	1.5	1.30771	1.33118	1.39365	1.24339	1.19095	1.08854	1.0094	0.981348	1.00872	0.867587	0.693613	0.60087	0.309454	0.249594	0.46533	0.449901	0.369799	0.508618	0.682555	0.652191	0.500721	0.364493	0.545593	0.734198	0.707443	0.625897	0.629147	0.782091	0.759668	0.767482	0.770338	0.982372	0.991307	0.856835
chr1:Enah		1.20496	1.20496	1.20496	1.20496	1.20496	1.20496	1.19695	1.17452	1.22435	1.18937	1.18189	1.17383	1.17852	1.15504	1.12206	1.07461	1.10286	1.13913	1.13747	1.05577	1.01512	0.985192	0.9449	0.893695	0.84918	0.783404	0.753289	0.6589	0.599854	0.599433	0.619191	0.613779	0.520671	0.542659	0.53328	0.560448	0.612551	0.643397	0.625593	0.659421	0.630561	0.629626	0.693667	0.73785	0.754094	0.789869	0.80107	0.8388
chr1:Kansl1l		1.20441	1.20441	1.20441	1.20441	1.20441	1.20441	1.23321	1.18507	1.22408	1.33389	1.41532	1.36393	1.3506	1.43466	1.5	1.41237	1.34508	1.39274	1.39544	1.2889	1.14337	1.02254	0.972354	0.89402	0.747101	0.621041	0.605299	0.592293	0.443763	0.382384	0.353784	0.408879	0.47352	0.505868	0.518765	0.564982	0.665436	0.701952	0.70327	0.75039	0.713607	0.775894	0.773351	0.775741	0.751007	0.755626	0.741734	0.706795
chr16:Gbe1		1.20424	1.20424	1.20424	1.20424	1.20424	1.20424	1.25987	1.21719	1.15692	1.32347	1.30775	1.21038	1.27513	1.28384	1.23985	1.27909	1.26287	1.16788	1.17407	1.14419	0.906059	0.858102	0.757267	0.625492	0.534322	0.54461	0.406696	0.253196	0.233351	0.17431	0.0778002	0.115856	0.167359	0.246394	0.251586	0.243695	0.273553	0.337808	0.278618	0.186918	0.122762	0.107723	-0.0271851	-0.194279	-0.284864	-0.331607	-0.316305	-0.351966
chr2:Ccdc141		1.20402	1.20402	1.20402	1.20402	1.20402	1.20402	1.28161	1.5	1.41179	1.5	1.5	1.5	1.5	1.5	1.5	1.35945	1.17377	1.08339	0.570851	0.420097	-0.202805	-0.489079	-0.657865	-1.11593	-1.40054	-1.5	-1.5	-1.5	-1.5	-1.5	-1.5	-1.49926	-1.5	-1.47644	-1.17556	-0.986248	-0.85822	-0.733535	-0.557479	-0.474594	-0.156363	-0.496908	-0.101719	0.141317	0.316425	0.263214	0.320984	0.235088
chr8:Neto2		1.20291	1.20291	1.20291	1.20291	1.20291	1.20291	1.21238	1.26513	1.19287	1.28104	1.20811	1.22591	1.26967	1.28291	1.18845	1.12437	1.17352	1.24181	1.18964	1.20407	1.18777	1.22662	1.14769	1.08834	1.05748	1.04951	1.03841	0.969994	0.869414	0.815541	0.779085	0.674335	0.71579	0.693389	0.646367	0.553063	0.525803	0.396095	0.474404	0.449921	0.445589	0.36755	0.416706	0.406807	0.402626	0.470065	0.475911	0.50336
chr9:Sik3		1.20124	1.20124	1.20124	1.20124	1.20124	1.20124	0.98066	1.03978	1.03263	1.11005	1.18325	1.38064	1.5	1.47799	1.20676	1.06666	0.886937	1.03005	1.11782	1.10243	0.959122	0.754995	0.490926	0.388851	0.148279	0.150387	-0.0591124	0.0150533	0.094958	0.131357	0.121648	0.0945994	0.190028	0.400858	0.406142	0.480104	0.557775	0.65606	0.636721	0.706943	0.506206	0.745653	0.858875	1.07773	0.881771	0.948995	1.19876	1.13085
chr6:Sox5	Y	1.20108	1.20108	1.20108	1.20108	1.20108	1.20108	1.12615	1.12032	1.09953	1.16417	1.22578	1.1341	1.05854	1.10224	1.10418	1.02126	0.94308	0.974029	0.963135	0.98911	0.841527	0.727339	0.69401	0.710068	0.620811	0.586831	0.594516	0.608236	0.634254	0.663033	0.62555	0.67758	0.705997	0.778554	0.762455	0.855028	0.927094	0.879551	0.820209	0.831173	0.803068	0.853723	0.891317	0.885551	0.915334	0.888334	0.831718	0.748999
chr7:Arhgef1		1.2008	1.2008	1.2008	1.2008	1.2008	1.2008	1.19855	1.17305	1.09374	1.12024	1.02355	1.00582	0.940767	1.00985	1.01861	0.995438	1.0284	1.04263	1.07124	1.08721	1.08143	1.06287	1.10708	1.10089	1.06489	1.01148	1.02882	0.981374	0.914548	0.890794	0.880107	0.827182	0.844198	0.793463	0.791982	0.755994	0.751989	0.74771	0.789859	0.849622	0.856644	0.82602	0.836403	0.836808	0.79471	0.752442	0.73786	0.708192
chr3:Lrig2		1.20065	1.20065	1.20065	1.20065	1.20065	1.20065	1.31268	1.3398	1.36572	1.41772	1.43059	1.5	1.5	1.47055	1.5	1.5	1.4674	1.39337	1.31571	1.24159	1.14871	1.08117	0.931365	0.856639	0.828063	0.7322	0.599437	0.499497	0.495742	0.43947	0.428472	0.503423	0.563491	0.612914	0.706959	0.657172	0.595562	0.674813	0.727989	0.713846	0.793513	0.751615	0.686631	0.589536	0.537778	0.512823	0.544826	0.586263
chr10:Ncoa7		1.20003	1.20003	1.20003	1.20003	1.20003	1.20003	1.22503	1.18067	1.19962	1.26515	1.28098	1.2294	1.34707	1.36032	1.5	1.5	1.5	1.46198	1.48677	1.26783	1.07138	0.943236	0.840546	0.777812	0.609121	0.505837	0.351474	0.266035	0.290708	0.295555	0.346414	0.366943	0.450175	0.565357	0.540292	0.616858	0.672036	0.757248	0.885503	1.0092	0.921653	0.857824	0.988105	0.894466	0.864023	0.874957	0.881953	0.744564
chr10:Pde7b		1.19977	1.19977	1.19977	1.19977	1.19977	1.19977	1.24119	1.28561	1.36357	1.41002	1.34512	1.40645	1.37153	1.32533	1.23766	1.24017	1.19872	1.07756	1.00949	0.912458	0.847306	0.818773	0.74174	0.765237	0.674646	0.696629	0.661699	0.709939	0.773907	0.731214	0.716994	0.712903	0.703929	0.760814	0.739405	0.811063	0.80874	0.803385	0.730018	0.722126	0.691086	0.674829	0.609774	0.680484	0.657435	0.65324	0.639106	0.620772
chr6:Snd1		1.19876	1.19876	1.19876	1.19876	1.19876	1.19876	1.10527	1.0239	1.06225	0.940821	0.856569	0.82247	0.87935	0.772772	0.928752	1.03884	0.93653	1.01478	1.10412	1.07722	1.06846	1.10279	1.10956	1.21835	1.38252	1.1808	1.13811	1.18057	1.17155	1.11512	1.0627	1.08883	0.992084	0.980391	0.768457	0.584563	0.704962	0.721286	0.841632	0.729484	0.591917	0.686304	0.778758	0.82179	0.818108	0.8418	0.729188	0.609339
chr7:Crtc3		1.19543	1.19543	1.19543	1.19543	1.19543	1.19543	1.284	1.30675	1.47662	1.3982	1.5	1.38139	1.5	1.4025	1.19201	1.25007	1.01523	0.673845	0.506696	0.403718	0.33215	0.311289	0.342508	0.280533	0.332388	0.43869	0.235622	0.360217	0.627666	0.616272	0.655928	0.909437	1.06877	1.17994	1.20887	1.1296	1.11352	1.23736	1.21229	1.17056	1.16262	0.869875	0.822815	0.812961	0.590931	0.31172	0.31733	0.439766
chr5:Dcun1d4		1.19503	1.19503	1.19503	1.19503	1.19503	1.19503	1.17527	1.17341	1.16215	0.999084	1.07744	1.16585	1.14319	1.16164	1.10933	1.11084	1.20531	1.21926	1.14085	1.08191	1.17376	1.0951	1.04719	1.05515	0.96423	0.903649	0.774869	0.769407	0.691075	0.650134	0.656838	0.512877	0.494366	0.524042	0.495063	0.564384	0.557438	0.600812	0.554152	0.679335	0.771791	0.742432	0.772575	0.803752	0.737757	0.807471	0.784025	0.855686
chr14:Bmpr1a		1.19322	1.19322	1.19322	1.19322	1.19322	1.19322	1.1728	1.1891	1.372	1.40657	1.30735	1.14831	1.07493	1.04628	1.04048	1.0397	1.0014	1.00663	0.874515	0.631731	0.478012	0.536114	0.591147	0.632981	0.571224	0.518792	0.339174	0.176213	0.0991121	0.00745491	0.0883502	0.143442	0.186176	0.283389	0.356069	0.321885	0.373251	0.58532	0.715269	0.822604	1.08101	0.988709	1.07993	0.942892	0.850612	0.806556	0.902188	1.01559
chr2:Lypd6		1.19308	1.19308	1.19308	1.19308	1.19308	1.19308	1.25026	1.20687	1.18784	1.13917	1.1436	1.11088	1.12998	1.06278	1.11505	1.14463	1.03671	0.905839	0.802162	0.639228	0.537653	0.368271	0.325835	0.206234	0.260687	0.2036	0.122033	0.123724	0.189917	0.280869	0.37892	0.464252	0.492338	0.487121	0.599644	0.568379	0.629768	0.680539	0.660579	0.576924	0.557826	0.62928	0.633409	0.625447	0.623538	0.577737	0.513063	0.391392
chr1:Sned1		1.19257	1.19257	1.19257	1.19257	1.19257	1.19257	1.18385	1.24304	1.11143	1.13644	1.16848	1.077	1.06969	1.0667	1.05074	1.05364	1.06856	1.00374	0.924604	0.916667	0.835047	0.757103	0.743721	0.67121	0.660034	0.588958	0.529638	0.453418	0.484082	0.462289	0.462841	0.501831	0.49286	0.55565	0.58708	0.604034	0.650104	0.685963	0.785145	0.79839	0.911413	0.950497	0.958802	0.951237	0.941894	0.902551	0.882298	0.916247
chr18:Megf10		1.19231	1.19231	1.19231	1.19231	1.19231	1.19231	1.21554	1.20341	1.19148	1.19728	1.16989	1.19155	1.2004	1.15799	1.13197	1.05863	1.03834	0.974085	0.936461	0.913731	0.845184	0.802388	0.805364	0.743084	0.790144	0.739942	0.746172	0.771202	0.80372	0.846843	0.824048	0.789573	0.783119	0.805972	0.83336	0.808139	0.804634	0.879323	0.863083	0.858776	0.80302	0.828139	0.882585	0.860059	0.831138	0.836769	0.785347	0.781096
chr2:B3galt1		1.19149	1.19149	1.19149	1.19149	1.19149	1.19149	1.21445	1.20929	1.1811	1.20162	1.18623	1.17543	1.20378	1.1965	1.20366	1.18999	1.13329	1.07106	1.01369	0.942802	0.859876	0.781713	0.706959	0.660793	0.585081	0.516725	0.481015	0.464605	0.478088	0.484984	0.516658	0.554117	0.596348	0.649633	0.665993	0.705011	0.758304	0.799946	0.840188	0.896502	0.96654	0.975803	0.97907	1.0024	0.98781	0.960447	0.92817	0.897806
chr7:9430041J12Rik		1.19098	1.19098	1.19098	1.19098	1.19098	1.19098	1.21443	1.16721	1.14062	1.0394	1.03114	1.07011	1.03753	1.12807	1.1417	1.27242	1.21285	1.15998	1.12563	1.11753	1.14478	1.07648	1.03822	1.03754	0.92991	0.901948	0.774255	0.788074	0.747663	0.772662	0.746324	0.728436	0.808668	0.786439	0.767816	0.752824	0.74156	0.755355	0.771478	0.818892	0.772398	0.840066	0.831777	0.782405	0.756925	0.768863	0.744677	0.739158
chr2:Gca		1.19086	1.19086	1.19086	1.19086	1.19086	1.19086	1.37988	1.30116	1.35815	1.33773	1.31777	1.25242	1.20246	1.13253	1.08067	0.979331	1.03264	0.925187	0.914285	0.932993	0.832616	0.756312	0.747413	0.876848	0.924685	0.901748	0.914835	0.792543	0.752477	0.704267	0.623136	0.730585	0.717068	0.745786	0.672708	0.743171	0.649886	0.562736	0.566768	0.543362	0.497719	0.521743	0.493578	0.586389	0.591009	0.521893	0.403407	0.505773
chr14:Dach1		1.19071	1.19071	1.19071	1.19071	1.19071	1.19071	1.16649	1.22647	1.31999	1.41116	1.37529	1.27641	1.29933	1.27822	1.2904	1.30648	1.2165	1.15563	1.06019	0.832502	0.570117	0.433721	0.181523	0.0386675	-0.075704	-0.178947	-0.317516	-0.361888	-0.396779	-0.312119	-0.240627	-0.067904	0.0618036	0.308355	0.337899	0.405863	0.548277	0.680661	0.812333	0.854627	0.911429	0.92165	0.934129	0.947375	0.973082	0.963029	0.955958	0.888434
chr14:Tm9sf2		1.19007	1.19007	1.19007	1.19007	1.19007	1.19007	1.35703	1.35602	1.46884	1.48882	1.28914	1.43798	1.45745	1.5	1.5	1.5	1.5	1.5	1.45771	1.31127	1.17723	1.28801	1.19625	1.03959	0.81326	0.849626	0.845932	0.760047	0.550038	0.512544	0.55717	0.531473	0.369742	0.350255	0.345734	0.152688	0.173666	0.0826909	0.30944	0.458698	0.433014	0.49653	0.51136	0.573317	0.480864	0.36701	0.453251	0.301076
chr5:Gm16599		1.19006	1.19006	1.19006	1.19006	1.19006	1.19006	1.28698	1.34928	1.33647	1.46396	1.41534	1.45786	1.5	1.5	1.5	1.5	1.5	1.42353	1.34401	1.24667	1.05532	1.06407	0.866673	0.688163	0.618305	0.544193	0.43516	0.326438	0.369194	0.387706	0.428339	0.525467	0.504	0.601365	0.557262	0.558476	0.597221	0.705588	0.845401	0.909222	0.857986	0.861082	0.837832	0.855574	0.767908	0.804738	0.643245	0.581417
chr5:Pkd2		1.18774	1.18774	1.18774	1.18774	1.18774	1.18774	1.23214	1.2984	1.19297	1.11132	1.25254	1.17743	1.12195	1.08429	1.09057	1.10627	1.19599	1.10523	0.993344	1.01596	0.853376	0.696475	0.748787	0.653566	0.541803	0.568168	0.545263	0.395891	0.400892	0.399052	0.316948	0.593506	0.705871	0.73747	0.661049	0.614848	0.56985	0.717841	0.769759	0.666712	0.729985	0.790466	0.854722	0.830567	0.65245	0.756012	0.783856	0.939943
chr8:Gnao1		1.18628	1.18628	1.18628	1.18628	1.18628	1.18628	1.20262	1.16897	1.15302	1.17608	1.13106	1.07832	1.0898	1.10598	1.06005	1.00884	0.943659	0.848441	0.864832	0.76355	0.70346	0.680101	0.635521	0.628397	0.575513	0.529809	0.496827	0.517747	0.488721	0.47218	0.503322	0.522782	0.564472	0.619361	0.648986	0.721973	0.824928	0.863577	0.882637	0.904451	0.972899	1.02281	1.06358	1.10816	1.09917	1.08369	1.09281	0.993443
chr11:Znrf3		1.18627	1.18627	1.18627	1.18627	1.18627	1.18627	1.44315	1.5	1.5	1.5	1.5	1.5	1.5	1.5	1.5	1.5	1.5	1.36268	0.98587	0.606651	0.486908	0.187867	-0.0644773	-0.039483	-0.116459	-0.272348	-0.381204	-0.625463	-0.391575	-0.254558	-0.242158	-0.0136037	0.0549236	0.0679477	0.0439672	0.163693	0.468591	0.585725	0.556191	0.568065	0.62861	0.76128	0.615778	0.880073	0.784691	0.954432	0.764158	0.719643
chr12:Prkch		1.18429	1.18429	1.18429	1.18429	1.18429	1.18429	1.06442	0.971637	1.09437	0.987945	0.941559	0.888524	0.925557	0.889947	0.930976	0.932891	0.87342	0.935858	0.993942	0.823831	0.831424	0.827468	0.837842	0.814551	0.841582	0.756866	0.737859	0.793953	0.749485	0.685515	0.791846	0.79264	0.767319	0.725721	0.737997	0.71705	0.722443	0.643019	0.564411	0.709985	0.764252	0.697824	0.732296	0.745373	0.878225	0.789727	0.70929	0.778136
chrX:Huwe1		1.1838	1.1838	1.1838	1.1838	1.1838	1.1838	1.18002	1.00127	1.05362	1.19888	1.24551	1.26029	1.29665	1.25274	1.27131	1.15541	1.11829	1.08021	1.00361	0.78686	0.518229	0.265418	0.252156	0.213965	0.0151628	-0.117079	-0.184564	-0.255469	-0.196914	-0.0394458	-0.0825609	0.0944914	0.227689	0.176464	0.239116	0.401282	0.487996	0.5538	0.667589	0.661086	0.76553	0.837583	0.786435	0.655757	0.838516	0.734791	0.813514	0.756201
chr15:Col2a1		1.18256	1.18256	1.18256	1.18256	1.18256	1.18256	1.15959	1.16449	1.11723	1.0865	1.06533	1.03144	0.974977	0.958453	0.939953	0.933343	0.917488	0.896301	0.850217	0.793019	0.795664	0.791557	0.801404	0.875239	0.840303	0.825927	0.837384	0.834352	0.819749	0.860399	0.890088	0.92487	0.940691	0.915239	0.884064	0.891243	0.880987	0.845301	0.847736	0.865482	0.829871	0.819027	0.774312	0.75084	0.761977	0.736248	0.766628	0.796227
chr4:Gm13052		1.18225	1.18225	1.18225	1.18225	1.18225	1.18225	1.12161	1.28821	1.27417	1.20101	1.11917	0.868751	0.82605	0.945704	0.837317	0.655924	0.765231	0.585566	0.488228	0.355328	0.369348	0.443264	0.587019	0.493212	0.398506	0.341433	0.532135	0.464232	0.59079	0.517106	0.582759	0.621231	0.565571	0.565623	0.62428	0.68966	0.696672	0.837587	0.901889	0.863068	0.981188	1.09165	1.23467	1.35561	1.37183	1.3127	1.29411	1.34122
chr9:Lrrc1		1.18178	1.18178	1.18178	1.18178	1.18178	1.18178	1.08586	1.08397	1.02952	1.10461	1.0298	1.06741	1.02808	0.925273	0.948236	0.892686	0.84787	0.911012	0.874997	0.884818	0.814659	0.789253	0.68031	0.673332	0.697944	0.62254	0.658601	0.695627	0.708828	0.726345	0.758894	0.767054	0.79031	0.81081	0.810556	0.873715	0.914855	0.919378	1.01145	0.988229	1.00476	0.991221	1.01622	1.07333	1.11354	1.10536	1.08654	1.08381
chr8:Nudt7		1.18163	1.18163	1.18163	1.18163	1.18163	1.18163	1.18174	1.21257	1.29959	1.45084	1.4093	1.24502	1.10059	1.05216	1.02257	0.889963	0.971267	0.9014	1.04332	0.905071	0.892403	0.948979	1.05822	1.0464	1.03598	1.13448	1.1831	1.25565	1.27147	1.136	1.18011	1.07242	0.968513	0.892753	0.935439	0.91347	0.753672	0.740507	0.542257	0.489822	0.414731	0.410278	0.345713	0.346013	0.36873	0.29996	0.191147	0.124999
chr15:Chadl		1.1806	1.1806	1.1806	1.1806	1.1806	1.1806	1.07414	1.06979	1.07571	1.05586	0.986877	1.03199	0.922766	0.970936	1.0419	0.975482	1.03031	1.02648	1.08636	1.08142	1.13893	1.15821	1.05474	1.09471	1.01809	1.01827	1.17303	1.1239	1.07589	1.00774	0.974589	0.847566	0.73371	0.822706	0.816725	0.788564	0.72723	0.549113	0.508845	0.595263	0.588038	0.510509	0.522288	0.508117	0.29821	0.266019	0.310847	0.236373
chr9:Pknox2		1.17957	1.17957	1.17957	1.17957	1.17957	1.17957	1.2408	1.26109	1.36566	1.37659	1.36835	1.29516	1.23662	1.23966	1.26302	1.19677	1.13869	0.985428	0.846407	0.713167	0.678891	0.614616	0.538842	0.415885	0.320678	0.24574	0.226903	0.185822	0.200573	0.210053	0.236114	0.250794	0.306466	0.416768	0.491615	0.618023	0.741536	0.876404	0.955673	1.00696	1.10665	1.23567	1.26629	1.31452	1.2489	1.30102	1.22532	1.13897
chr6:Zfp638		1.1793	1.1793	1.1793	1.1793	1.1793	1.1793	1.33809	1.46037	1.39431	1.5	1.5	1.5	1.5	1.5	1.5	1.5	1.5	1.36692	1.13023	1.07081	0.608018	0.35374	-0.0159688	0.0620961	0.107101	-0.234448	-0.384152	-0.343848	-0.386107	-0.232913	-0.18454	0.0679993	0.219858	0.386066	0.469712	0.321542	0.460908	0.3806	0.476768	0.786292	0.586778	0.557638	0.581896	0.557873	0.7303	0.519004	0.688803	0.641659
chr14:Gfra2		1.17874	1.17874	1.17874	1.17874	1.17874	1.17874	1.27549	1.23718	1.21878	1.25042	1.28727	1.32113	1.20138	1.1396	1.10906	1.12891	1.06548	0.969284	0.997274	0.968243	0.908668	0.791859	0.717487	0.745713	0.770584	0.756166	0.689126	0.760484	0.73691	0.653324	0.665868	0.637634	0.681049	0.643292	0.654577	0.690789	0.738725	0.765073	0.742763	0.762564	0.765976	0.775106	0.810211	0.859874	0.884821	0.894117	0.821771	0.773243
chr16:Mkl2		1.17834	1.17834	1.17834	1.17834	1.17834	1.17834	1.20291	1.0959	1.08904	1.06616	1.12979	1.11172	1.11676	1.07832	0.994248	0.961694	0.896421	0.919607	0.95795	0.81542	0.789432	0.671131	0.584632	0.550451	0.567259	0.577767	0.441983	0.404999	0.419763	0.401635	0.468531	0.409039	0.625326	0.770888	0.789618	0.842417	0.81655	0.933243	0.975926	0.881893	0.934715	0.972628	0.991627	0.856841	0.87207	0.744647	0.704991	0.666083
chr11:Gpatch8		1.17804	1.17804	1.17804	1.17804	1.17804	1.17804	1.09309	0.96757	1.00211	1.20251	1.30347	1.5	1.44488	1.42982	1.30963	1.05839	0.948623	0.877462	0.743052	0.573441	0.433777	0.184622	-0.108332	-0.090418	-0.211007	-0.387681	-0.236837	-0.283399	-0.138539	0.0262149	0.0378192	0.0934646	0.367739	0.426557	0.563105	0.572133	0.757014	0.775964	0.788912	0.783738	0.639009	0.836937	0.96599	1.01462	1.09468	0.839836	0.8792	0.638812
chr10:Ank3		1.17802	1.17802	1.17802	1.17802	1.17802	1.17802	1.25649	1.24291	1.08017	1.19657	1.28783	1.19795	1.30549	1.44776	1.49938	1.05773	0.783251	0.518429	0.232783	-0.102155	-0.496738	-1.05448	-1.5	-1.5	-1.5	-1.5	-1.5	-1.5	-1.5	-1.5	-1.5	-1.5	-1.5	-1.25115	-0.940153	-0.958248	-0.812697	-0.825017	-0.653088	-0.400834	-0.400751	-0.473876	-0.346075	-0.082962	-0.107752	-0.193863	-0.0761509	-0.251741
chr11:Ncor1		1.17778	1.17778	1.17778	1.17778	1.17778	1.17778	1.21828	1.15475	1.14878	1.18683	1.27815	1.24233	1.27261	1.14586	1.04732	1.09027	1.12927	1.09783	1.07969	0.995074	0.845681	0.726688	0.576852	0.496078	0.5401	0.501184	0.44069	0.434543	0.343293	0.384407	0.469327	0.54951	0.573411	0.664889	0.677224	0.665879	0.690665	0.698954	0.759544	0.84276	0.862802	0.802499	0.803524	0.823657	0.870174	0.88459	0.922967	0.922004
chr11:Myo1d		1.17696	1.17696	1.17696	1.17696	1.17696	1.17696	1.22457	1.15485	1.14872	1.28696	1.30009	1.41546	1.5	1.5	1.5	1.42158	1.40385	1.31478	1.19294	1.03938	0.831433	0.76016	0.591438	0.343719	0.274216	0.00509828	0.0640105	0.0891926	0.0985906	0.192779	0.283126	0.379654	0.381704	0.396234	0.359834	0.335424	0.502521	0.470899	0.425214	0.372329	0.327279	0.191181	0.116674	0.045405	0.123877	0.159309	0.171332	0.106518
chr7:St8sia2		1.17676	1.17676	1.17676	1.17676	1.17676	1.17676	1.14704	1.17376	1.17091	1.21134	1.23067	1.22064	1.21045	1.22627	1.21765	1.25805	1.23338	1.23282	1.22532	1.16273	1.07647	1.02359	0.990136	0.967687	0.945023	0.916128	0.858205	0.838292	0.816168	0.823042	0.780891	0.796166	0.751559	0.714715	0.706674	0.684382	0.66531	0.644016	0.641351	0.634719	0.577981	0.60358	0.577443	0.631988	0.638755	0.594891	0.589214	0.609537
chr16:Kalrn		1.17571	1.17571	1.17571	1.17571	1.17571	1.17571	1.2231	1.30341	1.14257	1.15417	1.13288	1.11799	1.07439	0.991779	1.00949	0.926118	1.02041	0.917756	0.847793	0.841058	0.761203	0.687807	0.573836	0.519068	0.489513	0.405204	0.338519	0.328195	0.465873	0.353667	0.407031	0.412798	0.389848	0.388471	0.336151	0.368851	0.41551	0.454507	0.439627	0.309168	0.399225	0.337913	0.388392	0.428177	0.42664	0.539037	0.389323	0.361329
chr13:Fam159b		1.17571	1.17571	1.17571	1.17571	1.17571	1.17571	1.28267	1.29783	1.43724	1.45053	1.46034	1.5	1.5	1.5	1.46981	1.32951	1.21009	1.05374	0.917772	0.710553	0.542559	0.422522	0.26069	0.0958799	-0.0225279	-0.141226	-0.193285	-0.249782	-0.259217	-0.164958	-0.102393	0.0456245	0.203301	0.366245	0.503866	0.642042	0.803153	0.957674	1.04007	1.15732	1.2116	1.24592	1.25366	1.22235	1.13214	1.1044	1.08838	1.02924
chr5:Rasa4		1.1727	1.1727	1.1727	1.1727	1.1727	1.1727	1.19077	1.19149	1.14919	1.15625	1.14376	1.1421	1.14149	1.23074	1.18231	1.16678	1.22062	1.20521	1.15854	1.16384	1.1973	1.07038	1.00193	0.949998	0.86588	0.800183	0.823857	0.749211	0.730325	0.716118	0.635347	0.551679	0.612683	0.581267	0.603424	0.639109	0.681706	0.662226	0.67163	0.73243	0.753601	0.772698	0.766742	0.723265	0.711073	0.669085	0.709007	0.743414
chr1:R3hdm1		1.17036	1.17036	1.17036	1.17036	1.17036	1.17036	1.37453	1.34795	1.46438	1.5	1.5	1.5	1.5	1.49074	1.32982	1.22445	1.14466	0.980088	1.06309	0.945927	0.736577	0.342392	0.240155	0.0215164	-0.195028	-0.314334	-0.280478	-0.269648	-0.26311	-0.417064	-0.301544	-0.274565	-0.143171	-0.145563	0.0709141	0.332221	0.443928	0.559116	0.596557	0.683896	0.604947	0.44795	0.437132	0.622013	0.656127	0.659871	0.509346	0.549534
chr16:Dlg1		1.16938	1.16938	1.16938	1.16938	1.16938	1.16938	1.21923	1.2987	1.2329	1.27242	1.31366	1.35487	1.36943	1.33289	1.39944	1.42083	1.23648	1.09605	1.01562	0.907031	0.737788	0.60121	0.482935	0.438776	0.370081	0.337788	0.260612	0.363319	0.420254	0.389118	0.436121	0.511567	0.646383	0.61457	0.654088	0.707748	0.839978	0.906917	0.850796	0.84995	0.872718	0.86453	0.917745	0.908207	0.945272	0.923228	0.948704	0.99053
chr16:Tmem44		1.16819	1.16819	1.16819	1.16819	1.16819	1.16819	1.22682	1.29756	1.32771	1.45485	1.4718	1.5	1.48716	1.24581	1.12681	1.13808	1.06031	0.992023	0.881611	0.807735	0.705151	0.631445	0.56186	0.489053	0.538113	0.648699	0.461679	0.408219	0.409925	0.462838	0.474757	0.526044	0.590831	0.696082	0.781509	0.782703	0.697449	0.877313	1.02195	1.05602	1.15805	1.17175	1.13113	1.05378	0.853526	0.818103	0.774174	0.824906
chr5:Tmem243		1.16733	1.16733	1.16733	1.16733	1.16733	1.16733	1.2931	1.36674	1.38263	1.31679	1.35205	1.28714	1.32319	1.28262	1.24876	1.22108	1.08186	1.10363	1.05034	0.933545	0.901281	0.838883	0.768462	0.736047	0.769056	0.731427	0.634369	0.579181	0.520994	0.534634	0.579156	0.617552	0.597867	0.657085	0.602277	0.66559	0.675882	0.718859	0.779851	0.72011	0.697675	0.677628	0.651736	0.684529	0.666716	0.655905	0.52321	0.575002
chrX:Mid1		1.166	1.166	1.166	1.166	1.166	1.166	1.15607	1.14635	1.10885	1.10481	1.10608	1.07317	1.07661	1.04235	1.0536	1.0328	1.01926	1.04042	1.01143	0.998437	0.963252	0.929101	0.892694	0.873106	0.866737	0.868985	0.851963	0.80569	0.781704	0.785002	0.773806	0.772905	0.775115	0.78799	0.780703	0.792948	0.773715	0.799066	0.827569	0.828727	0.856672	0.831279	0.880202	0.88355	0.873127	0.881076	0.880971	0.90563
chr6:Atp2b2		1.16478	1.16478	1.16478	1.16478	1.16478	1.16478	1.18955	1.17025	1.15806	1.28072	1.23059	1.19742	1.15374	1.18296	1.1579	1.16769	1.05895	0.996675	1.0275	0.989768	0.872543	0.852238	0.88323	0.836993	0.784523	0.647506	0.657584	0.730068	0.732753	0.635327	0.584583	0.620403	0.617846	0.663557	0.639908	0.667122	0.766008	0.805921	0.787443	0.837774	0.889159	0.930415	0.939682	0.921214	0.807454	0.96415	0.922355	0.849225
chr12:Dgkb		1.16439	1.16439	1.16439	1.16439	1.16439	1.16439	1.20431	1.17454	1.22497	1.27869	1.28708	1.28574	1.3206	1.29337	1.26456	1.20344	1.08549	0.981137	0.909555	0.772077	0.609791	0.500677	0.377247	0.261339	0.181477	0.104316	0.0648604	0.087726	0.105157	0.147546	0.203631	0.313078	0.380663	0.502064	0.59176	0.714581	0.835877	0.931499	0.981259	1.0786	1.14248	1.20995	1.22058	1.28804	1.27652	1.28562	1.24965	1.18092
chr19:Rfx3		1.16347	1.16347	1.16347	1.16347	1.16347	1.16347	1.20657	1.24097	1.22228	1.24383	1.19667	1.16726	1.24869	1.19392	1.22322	1.18862	1.12205	1.12743	1.0757	0.98502	0.942885	0.905655	0.855228	0.802098	0.770652	0.705438	0.682539	0.667035	0.660042	0.675124	0.66012	0.652127	0.625285	0.618328	0.601626	0.618364	0.646398	0.681079	0.712864	0.748504	0.732342	0.743538	0.757795	0.7946	0.881105	0.89946	0.899761	0.950199
chr2:Tanc1		1.16124	1.16124	1.16124	1.16124	1.16124	1.16124	1.16856	1.20645	1.2536	1.13174	1.04809	0.956051	0.911144	0.799637	0.766716	0.804253	0.76082	0.743918	0.64318	0.522881	0.461811	0.447756	0.371788	0.375031	0.373514	0.372991	0.378105	0.503809	0.46239	0.48184	0.487519	0.566928	0.684895	0.817966	0.782155	0.78679	0.80777	0.856468	0.802485	0.8831	0.908695	1.01217	0.986326	0.96422	0.904664	0.892486	0.824392	0.804059
chr9:Stag1		1.15965	1.15965	1.15965	1.15965	1.15965	1.15965	1.24152	1.35136	1.23944	1.36478	1.26746	1.21435	1.36112	1.42331	1.43349	1.19373	1.14628	1.15462	0.956907	0.763597	0.610392	0.44831	0.161625	-0.0602349	-0.183568	-0.337386	-0.376673	-0.476236	-0.421508	-0.275386	-0.0661236	0.00277991	0.144709	0.404587	0.550451	0.547203	0.577969	0.705777	0.764578	0.719015	0.745763	0.761146	0.793896	0.8046	0.859663	0.682313	0.628925	0.589748
chr5:Lnx2		1.15832	1.15832	1.15832	1.15832	1.15832	1.15832	1.19477	1.26192	1.21097	1.26479	1.14873	1.19146	1.20037	1.17328	1.23007	1.23552	1.20496	1.1119	1.0321	1.04553	1.02679	0.986086	0.817245	0.82287	0.811687	0.782209	0.723231	0.743904	0.700748	0.655537	0.567555	0.548297	0.569168	0.56674	0.496215	0.516563	0.592155	0.493663	0.441543	0.446922	0.479563	0.397491	0.530037	0.487911	0.554742	0.518269	0.453574	0.37817
chr15:Dip2b		1.15706	1.15706	1.15706	1.15706	1.15706	1.15706	1.26769	1.19411	1.22123	1.28016	1.18916	1.24196	1.18813	1.22664	1.29769	1.2502	1.27708	1.05014	1.05683	0.945432	0.800223	0.716007	0.581529	0.299571	0.307031	0.272696	0.482907	0.346903	0.450052	0.415064	0.566334	0.741539	0.782582	0.75735	1.03604	1.03184	1.0769	1.11128	1.22801	1.15177	1.15333	0.907692	0.975973	1.14655	1.10357	0.9291	0.822674	0.633051
chr4:Arhgef10l		1.15664	1.15664	1.15664	1.15664	1.15664	1.15664	1.13864	1.11435	1.03604	1.23541	1.15723	1.05792	0.87682	0.84889	0.79341	0.725768	0.739755	0.634879	0.581107	0.577477	0.401789	0.35027	0.349403	0.495976	0.513043	0.553666	0.608769	0.504344	0.555225	0.666577	0.71991	0.876153	0.914984	0.973322	0.899758	0.968041	1.03406	1.05618	1.03845	1.12796	1.07648	1.14988	0.997984	1.06536	1.12196	1.08006	1.04092	0.854035
chr16:Lsamp		1.15462	1.15462	1.15462	1.15462	1.15462	1.15462	1.18668	1.20157	1.18515	1.22544	1.23008	1.20247	1.2154	1.18958	1.17809	1.15354	1.11374	1.07619	0.999152	0.931798	0.830607	0.745754	0.695681	0.617021	0.575567	0.537632	0.501395	0.504639	0.506022	0.524727	0.558771	0.603523	0.653181	0.719012	0.757989	0.787013	0.827631	0.860631	0.874351	0.919879	0.94414	0.94561	0.95189	0.961274	0.939705	0.941305	0.935498	0.925573
chr4:Adamtsl1		1.15312	1.15312	1.15312	1.15312	1.15312	1.15312	1.13358	1.17607	1.16694	1.1696	1.16365	1.10485	1.09561	1.11174	1.07203	1.07605	1.09863	1.10084	1.07607	1.02297	0.984262	0.942164	0.945353	0.895199	0.878413	0.864525	0.81926	0.77563	0.794284	0.73837	0.759504	0.77076	0.741443	0.759528	0.761169	0.736078	0.7001	0.699392	0.715269	0.685666	0.686542	0.659631	0.630775	0.644258	0.664349	0.652933	0.640288	0.660195
chrX:Ndp		1.15312	1.15312	1.15312	1.15312	1.15312	1.15312	1.09342	1.07659	1.12	1.21027	1.29729	1.31871	1.2917	1.29906	1.2368	1.25587	1.3117	1.24927	1.24478	1.2606	1.13827	1.10661	1.09659	1.06144	0.975602	0.948267	0.958168	0.938706	1.01181	0.98927	0.917848	0.955803	0.873805	0.79263	0.748634	0.814069	0.795839	0.750864	0.708671	0.564787	0.528475	0.440302	0.376959	0.423606	0.422271	0.387018	0.370324	0.324927
chr10:Lrig3		1.15255	1.15255	1.15255	1.15255	1.15255	1.15255	1.27886	1.24706	1.31053	1.27408	1.29201	1.24703	1.36785	1.39439	1.5	1.39081	1.26852	1.10297	1.20671	1.19225	1.09436	1.00139	0.832763	0.625461	0.460835	0.207803	0.155436	0.259623	0.332141	0.299339	0.244845	0.205589	0.382021	0.506793	0.533177	0.7134	0.751271	0.951842	0.782307	0.738724	0.6577	0.695075	0.77033	0.742561	0.759295	0.701784	0.626982	0.534984
chr11:Msi2		1.15229	1.15229	1.15229	1.15229	1.15229	1.15229	1.16838	1.17361	1.1552	1.17921	1.16541	1.16198	1.1476	1.11318	1.09435	1.05008	0.991771	0.934955	0.860502	0.810577	0.731265	0.671041	0.60481	0.549911	0.520287	0.48424	0.471928	0.46672	0.488609	0.527129	0.556882	0.62289	0.670151	0.708686	0.767467	0.820837	0.879608	0.922971	0.979938	1.01838	1.0359	1.04207	1.0393	1.05128	1.08817	1.08728	1.07954	1.0314
chr18:Kctd1		1.15108	1.15108	1.15108	1.15108	1.15108	1.15108	1.16205	1.23524	1.22294	1.25916	1.20352	1.21128	1.11793	1.10883	1.15316	1.17366	1.13015	1.04826	0.983512	0.959466	0.919999	0.818562	0.803318	0.836906	0.840092	0.75938	0.816067	0.778862	0.839684	0.880638	0.917903	0.923374	0.921762	0.891176	0.897337	0.837053	0.889505	0.969652	1.01669	0.926189	0.882165	0.859374	0.798042	0.764289	0.64718	0.604051	0.585806	0.506203
chr15:Sdc2		1.1481	1.1481	1.1481	1.1481	1.1481	1.1481	1.3474	1.25404	1.1839	1.10024	1.00389	0.995224	0.920626	0.954995	0.707089	0.540043	0.436126	0.290826	0.330225	0.294477	0.191129	0.0190313	-0.126888	-0.393024	-0.581081	-0.560959	-0.689218	-0.744559	-0.638659	-0.565963	-0.382834	-0.366699	-0.214609	-0.132259	0.10024	0.334101	0.501447	0.747207	0.92515	0.884314	1.05335	0.975047	1.0521	1.00086	1.17811	1.05885	0.95955	0.939106
chr1:Kdm5b		1.14781	1.14781	1.14781	1.14781	1.14781	1.14781	1.15639	1.12064	1.02248	1.06872	1.05777	1.05644	1.06554	1.10465	1.08957	1.16401	1.20977	1.2276	1.22757	1.28878	1.20749	1.13453	1.06511	1.02117	0.997948	1.01878	0.958794	0.888551	0.829628	0.886618	0.814905	0.837324	0.876864	0.914765	0.888439	0.837995	0.813334	0.779095	0.788399	0.768536	0.698367	0.674028	0.703086	0.69028	0.705629	0.663519	0.729554	0.669017
chr15:St13		1.14745	1.14745	1.14745	1.14745	1.14745	1.14745	0.854101	0.517598	0.334643	0.252308	0.219794	0.0787394	-0.114665	-0.0877757	0.120336	0.0709565	0.0727619	-0.0130057	0.191368	0.335603	0.239635	0.306716	0.206638	0.490532	0.471532	0.396411	0.373199	0.267556	0.359351	0.168641	0.0105246	0.0277928	-0.150352	-0.146493	-0.135997	0.0607818	-0.21825	-0.10873	-0.0924523	-0.293276	-0.250057	-0.0919175	0.00484959	-0.0153077	-0.0957305	-0.303593	-0.366531	0.325508
chr9:Fat3		1.14677	1.14677	1.14677	1.14677	1.14677	1.14677	1.16851	1.1746	1.19931	1.2027	1.20088	1.15458	1.16621	1.09325	1.09413	1.05098	1.02596	0.977063	0.907749	0.865706	0.790442	0.766612	0.759045	0.714027	0.681172	0.627678	0.6317	0.649356	0.634868	0.680467	0.693546	0.743807	0.773605	0.779449	0.825498	0.914808	0.979524	0.968263	0.960354	0.989721	0.998756	0.999238	1.01578	1.01319	1.02624	0.971598	0.916224	0.870341
chr11:Usp34		1.14574	1.14574	1.14574	1.14574	1.14574	1.14574	1.30622	1.46309	1.45781	1.5	1.47775	1.29108	1.25382	1.1218	1.08561	0.83667	0.847355	0.678629	0.359919	0.195625	-0.0787329	-0.338016	-0.472242	-0.567541	-0.72043	-0.866837	-0.836356	-0.829024	-1.01605	-1.06154	-0.903672	-0.943926	-0.734126	-0.663422	-0.591054	-0.447706	-0.205463	-0.0451086	0.042767	0.310818	0.444441	0.429832	0.68988	0.730745	0.680327	0.79611	0.650546	0.536989
chr2:Cers6		1.14549	1.14549	1.14549	1.14549	1.14549	1.14549	1.1705	1.33169	1.36293	1.34579	1.25178	1.17593	1.25374	1.13705	1.01259	0.836668	0.707729	0.527403	0.330547	0.428539	0.326614	0.197123	0.0766697	-0.156287	-0.278591	-0.237848	-0.100749	-0.227312	-0.1054	0.0405747	-0.158114	-0.211174	-0.216404	-0.101489	-0.0576755	0.0862265	0.196814	0.263672	0.386614	0.533029	0.514124	0.643535	0.810737	0.762325	0.580114	0.498194	0.427606	0.266394
chr14:Adk		1.14547	1.14547	1.14547	1.14547	1.14547	1.14547	0.982272	1.02725	0.962607	1.10473	1.14053	1.31481	1.32681	1.5	1.41981	1.41358	1.28421	1.26011	0.981159	0.889727	0.653704	0.551556	0.325346	0.240146	-0.114335	-0.143646	-0.206989	-0.256833	-0.320276	-0.0400758	0.0956233	0.209095	0.162376	0.19761	0.0812597	0.243447	0.131653	0.165453	0.0170432	0.242816	0.136014	-0.103197	-0.0704456	-0.0217119	-0.115456	0.214362	-0.0567173	0.114648
chrX:Ap1s2		1.14531	1.14531	1.14531	1.14531	1.14531	1.14531	1.11783	1.06274	1.11588	1.14305	1.16252	1.1771	1.16959	1.12418	1.08258	1.15368	1.1424	1.20574	1.21693	1.15768	1.10297	1.07636	1.03327	1.0256	1.04545	1.03053	0.944331	0.898316	0.807276	0.820848	0.782456	0.765595	0.739933	0.760171	0.756004	0.744108	0.758941	0.712509	0.725979	0.743858	0.722215	0.732104	0.697261	0.687253	0.669864	0.641438	0.652725	0.637563
chr10:Mcu		1.14392	1.14392	1.14392	1.14392	1.14392	1.14392	1.00935	1.09667	1.15756	1.26697	1.08292	1.12084	1.15899	1.18156	1.21294	1.21022	1.28462	1.39289	1.15337	1.05596	0.973314	0.90275	0.583343	0.462913	0.372794	0.381706	0.328057	0.328988	0.349751	0.48725	0.506758	0.591443	0.680431	0.86061	0.964591	1.04209	1.14177	1.18341	1.26751	1.08289	1.10767	0.957801	0.832741	0.961005	0.799519	0.730452	0.665891	0.637056
chr6:Met		1.14382	1.14382	1.14382	1.14382	1.14382	1.14382	1.1557	1.17953	1.196	1.17493	1.15401	1.12503	1.11736	1.12165	1.12114	1.08711	1.09745	1.10411	1.07703	1.03639	1.02991	1.0208	1.05394	1.01822	0.96955	0.967803	0.951462	0.921128	0.917943	0.869989	0.845376	0.829213	0.825491	0.793202	0.779338	0.782604	0.72662	0.74295	0.756662	0.705927	0.673955	0.688921	0.696378	0.686168	0.682334	0.709751	0.699448	0.695669
chr8:Tll1		1.14278	1.14278	1.14278	1.14278	1.14278	1.14278	1.15752	1.08851	1.08068	1.10023	0.98424	1.03755	1.05432	1.0763	1.03692	0.94883	0.901555	0.899012	0.880905	0.879535	0.905741	0.945614	0.852094	0.795715	0.834767	0.899741	0.924184	0.931234	0.954883	1.00191	0.994746	0.936927	0.923827	0.951519	1.02193	0.900682	0.792837	0.743852	0.735191	0.71644	0.756851	0.674998	0.719918	0.689326	0.651753	0.652393	0.76765	0.86992
chr1:Dsel		1.14232	1.14232	1.14232	1.14232	1.14232	1.14232	1.12358	1.11838	1.10594	1.1304	1.09162	1.19631	1.20642	1.14667	1.10369	1.15355	1.19066	1.17602	1.10658	1.09783	1.04834	1.06301	0.936919	0.95951	0.898886	0.946439	0.874899	0.828395	0.801656	0.825776	0.858457	0.817037	0.783909	0.70596	0.650131	0.768946	0.720569	0.673245	0.608692	0.647664	0.642795	0.594763	0.629635	0.587521	0.67128	0.756959	0.722881	0.776113
chr19:Tle4		1.13999	1.13999	1.13999	1.13999	1.13999	1.13999	1.15947	1.20857	1.22185	1.24888	1.22042	1.15475	1.16095	1.12446	1.08485	1.08722	1.21115	1.22594	1.16721	1.18083	1.16086	1.0443	0.941541	0.919571	0.94369	0.937376	0.777126	0.666828	0.590043	0.584375	0.576364	0.600551	0.663774	0.740292	0.674469	0.711467	0.777152	0.720573	0.735589	0.710359	0.646164	0.546847	0.595968	0.526741	0.506091	0.584826	0.54192	0.540836
chr9:Plod2		1.13853	1.13853	1.13853	1.13853	1.13853	1.13853	1.06644	1.08318	1.15486	1.18858	1.24277	1.41385	1.37137	1.30078	1.34925	1.18486	1.17057	1.22732	1.16988	1.02217	1.11577	0.861201	0.686815	0.587562	0.453822	0.368209	0.372227	0.340982	0.308392	0.244756	0.344938	0.29636	0.380333	0.480184	0.474598	0.58998	0.670679	0.734974	0.742924	0.71678	0.864394	0.871948	0.795351	0.888957	0.806278	0.772537	0.705229	0.674802
chr3:Gm3764		1.13828	1.13828	1.13828	1.13828	1.13828	1.13828	1.20313	1.16427	1.15478	1.09485	1.14535	1.18242	1.27185	1.28051	1.26162	1.26657	1.19859	0.996089	0.904492	0.774232	0.733407	0.637636	0.553439	0.404514	0.310757	0.240154	0.178089	0.100061	0.181501	0.22655	0.30011	0.395127	0.520206	0.634793	0.718147	0.79035	0.913953	1.0344	1.10627	1.20145	1.36572	1.39014	1.37014	1.34327	1.31679	1.29295	1.24262	1.08882
chr5:Kmt2c		1.13672	1.13672	1.13672	1.13672	1.13672	1.13672	1.23956	1.1828	1.29656	1.5	1.5	1.44499	1.45863	1.47344	1.34659	1.27836	1.27726	1.12303	1.08267	0.882098	0.681284	0.547096	0.513267	0.545872	0.462627	0.425542	0.394009	0.215944	0.304578	0.302836	0.299343	0.321485	0.42408	0.416759	0.444575	0.58213	0.661196	0.668697	0.751176	0.598487	0.575178	0.694508	0.676747	0.683937	0.781364	0.687071	0.725603	0.643385
chr10:Nav3		1.13634	1.13634	1.13634	1.13634	1.13634	1.13634	1.1919	1.23916	1.07496	1.024	0.969226	0.880086	1.09554	1.18179	1.19579	1.25778	1.06168	1.06226	0.959462	0.954951	0.893378	0.877058	0.915484	0.904583	0.844136	0.764677	0.727937	0.599265	0.453551	0.523389	0.504718	0.78243	0.815135	0.835043	0.677081	0.692103	0.601105	0.490804	0.779904	0.841227	0.830898	0.783598	0.59544	0.544541	0.474284	0.523879	0.48747	0.662614
chr6:Lrig1		1.13564	1.13564	1.13564	1.13564	1.13564	1.13564	1.10793	1.11553	1.05306	1.20678	1.128	1.1162	1.04052	0.966421	0.999242	0.989111	0.991312	0.99378	0.82777	0.910195	0.803096	0.733252	0.67587	0.678019	0.699225	0.563203	0.498206	0.584116	0.556534	0.680437	0.589247	0.483411	0.541212	0.59693	0.630481	0.623219	0.759004	0.868532	0.811783	0.900233	0.905731	0.991061	1.14853	1.15728	1.20417	1.15678	1.17266	1.06835
chr6:Atg7		1.13494	1.13494	1.13494	1.13494	1.13494	1.13494	1.41044	1.31972	1.10653	1.15378	1.04494	1.00108	1.14338	1.23912	1.2011	1.25688	1.5	1.3976	1.43111	1.40872	1.4941	1.4908	1.40048	1.19152	1.14716	1.06594	1.00604	0.689318	0.642784	0.57718	0.676223	0.735931	0.707895	0.60884	0.619083	0.560693	0.560447	0.595541	0.593604	0.512772	0.473127	0.364626	0.255981	0.389239	0.518386	0.562857	0.581136	0.567682
chr10:Hs3st5		1.1334	1.1334	1.1334	1.1334	1.1334	1.1334	1.07391	1.06904	1.02013	0.992329	1.0077	0.976761	1.05247	1.06192	1.10302	1.02659	0.9717	1.03497	1.03492	1.02728	1.04578	1.04322	1.10836	1.07907	1.17292	1.13084	1.14601	1.19882	1.17743	1.18494	1.12283	1.13872	1.03347	0.991683	0.917014	0.695209	0.640848	0.555667	0.494716	0.514599	0.46736	0.511649	0.468339	0.477518	0.508852	0.537228	0.639302	0.639556
chr1:Unc50		1.13194	1.13194	1.13194	1.13194	1.13194	1.13194	1.13973	1.23138	1.22001	1.15532	1.19854	1.34492	1.5	1.5	1.5	1.5	1.5	1.5	1.45784	1.5	1.5	1.5	1.40148	1.21877	1.11031	1.06827	0.988462	1.05194	0.999123	0.942664	0.824506	0.670004	0.61399	0.540309	0.552609	0.48704	0.514594	0.445972	0.413385	0.369514	0.454795	0.430161	0.283737	0.298585	0.303952	0.0861058	0.0591912	-0.0932618
chr13:Arl15		1.13084	1.13084	1.13084	1.13084	1.13084	1.13084	1.13572	1.21753	1.27446	1.28768	1.38335	1.22761	1.16937	1.20751	1.28898	1.29245	1.27566	1.23123	0.932414	0.841448	0.721591	0.514976	0.618377	0.623465	0.42728	0.324714	0.301523	0.276146	0.210319	0.275032	0.25539	0.363083	0.507658	0.623972	0.624013	0.718275	0.733738	0.916448	0.984265	1.18896	1.2289	1.1819	1.20694	1.17604	0.939586	0.842796	0.87924	0.97507
chr6:Grm7		1.13059	1.13059	1.13059	1.13059	1.13059	1.13059	1.15968	1.16459	1.20668	1.27889	1.2849	1.2683	1.23985	1.18136	1.18267	1.17027	1.114	1.09872	1.07805	1.03523	0.937401	0.837222	0.819205	0.760627	0.72195	0.65388	0.635105	0.629877	0.635029	0.582145	0.589305	0.59932	0.635151	0.655732	0.67259	0.699157	0.78547	0.819716	0.808083	0.839048	0.846423	0.848527	0.844084	0.86237	0.846516	0.868624	0.882158	0.823042
chr5:Rsrc2		1.12776	1.12776	1.12776	1.12776	1.12776	1.12776	0.96096	1.08794	1.15009	0.993751	1.15934	1.12187	0.988743	1.2683	1.22959	1.18019	1.20662	1.16879	1.07063	1.00747	1.12781	0.730774	0.640233	0.534794	0.375554	0.341823	0.252811	0.0783843	0.178653	0.127237	-0.0493423	-0.41446	-0.26996	-0.0477203	0.103135	0.157839	0.099311	0.00354548	-0.0450874	0.197862	0.261682	0.470578	0.687508	0.709508	0.570932	0.373239	0.347812	0.53257
chr7:Arntl		1.12618	1.12618	1.12618	1.12618	1.12618	1.12618	1.19701	1.35126	1.1375	1.27793	1.26023	1.12568	1.35228	1.22536	1.17022	1.27793	1.06345	0.894101	0.748537	0.726472	0.483285	0.424767	0.420621	0.3469	0.153453	0.288221	0.292806	0.331965	0.377303	0.43365	0.512319	0.689703	0.746521	0.717149	0.62412	0.724114	0.643453	0.593351	0.776656	0.929957	0.836209	1.00774	0.999799	1.08875	1.05618	1.29856	1.22488	1.26079
chr9:Cadm1	Y	1.12379	1.12379	1.12379	1.12379	1.12379	1.12379	1.11993	1.10428	1.07953	1.09494	1.08854	1.07637	1.09911	1.07316	1.05912	1.04406	1.03666	1.0166	1.01991	1.0064	0.959073	0.942691	0.920784	0.887041	0.879338	0.886129	0.868892	0.860393	0.859551	0.846014	0.845063	0.861639	0.862861	0.854992	0.849063	0.855623	0.843572	0.86093	0.861031	0.847751	0.837319	0.812044	0.810725	0.820556	0.835398	0.829703	0.813294	0.805095
chr18:Rock1		1.12349	1.12349	1.12349	1.12349	1.12349	1.12349	1.3271	1.42227	1.5	1.5	1.5	1.5	1.5	1.47392	1.46974	1.4655	1.41655	1.26218	1.13322	0.962283	0.80725	0.749181	0.553269	0.467378	0.362245	0.231192	0.186535	0.225228	0.135551	0.143337	0.113702	0.26743	0.2162	0.239376	0.393209	0.305968	0.438838	0.584801	0.596776	0.586145	0.701661	0.739637	0.731212	0.994884	1.05016	1.01235	1.23625	1.0895
chr1:Utp14b		1.1204	1.1204	1.1204	1.1204	1.1204	1.1204	1.00242	0.940069	0.864501	0.809386	0.779656	0.759121	0.598477	0.573606	0.595587	0.557032	0.550941	0.546218	0.576228	0.555365	0.527657	0.508382	0.523688	0.555017	0.606182	0.535534	0.576331	0.622731	0.654407	0.637937	0.711773	0.800411	0.859833	0.831094	0.887395	0.885738	0.934462	0.912006	0.942574	0.96524	1.01176	1.05841	1.02587	1.113	1.16422	1.14034	1.18516	1.24392
chr13:Ssbp2		1.11985	1.11985	1.11985	1.11985	1.11985	1.11985	1.09621	1.0986	1.11014	1.1491	1.18682	1.19553	1.18745	1.1807	1.1316	1.07741	1.06397	1.03381	0.990385	0.913677	0.832614	0.733544	0.698967	0.615587	0.575076	0.558744	0.550624	0.495525	0.490667	0.486654	0.503111	0.544216	0.577108	0.611061	0.668653	0.695482	0.705115	0.761636	0.824219	0.864333	0.912426	0.913347	0.939189	0.979634	0.991093	1.00986	1.03751	1.04381
chr9:Armc8		1.11975	1.11975	1.11975	1.11975	1.11975	1.11975	1.16871	1.16749	1.19216	1.20185	1.24373	1.19542	1.14636	1.22902	1.20886	1.09665	1.06983	1.05779	1.03219	0.959108	0.894071	0.879382	0.765291	0.720687	0.6515	0.635567	0.660799	0.629687	0.638419	0.641315	0.655299	0.661053	0.631427	0.803031	0.871035	0.914072	0.925768	0.908782	0.928863	0.924859	0.935199	1.00477	0.981774	1.0543	0.973333	0.958465	0.911834	0.840913
chr14:Arhgef40		1.11721	1.11721	1.11721	1.11721	1.11721	1.11721	0.94591	0.939679	0.781096	0.505466	0.481477	0.553753	0.679054	0.707255	0.803426	0.889297	0.981019	1.11887	1.09452	1.09523	1.2078	1.20653	1.08785	0.948249	0.766185	0.643836	0.608631	0.669118	0.56429	0.638376	0.605704	0.631032	0.680376	0.6951	0.84459	0.858163	0.877498	0.898622	0.730337	0.853239	0.924991	1.02398	1.01628	1.06378	1.10296	1.08321	1.07936	1.18534
chr6:Jazf1		1.1169	1.1169	1.1169	1.1169	1.1169	1.1169	1.20191	1.15852	1.31179	1.34849	1.2817	1.42974	1.5	1.43652	1.5	1.46812	1.37269	1.29518	1.21039	0.983468	0.826508	0.690867	0.517885	0.337109	0.207339	0.0616215	0.116791	0.0666593	-0.0291123	0.104141	0.192109	0.251566	0.366498	0.481499	0.69854	0.837667	0.948688	0.921304	1.0002	1.09534	1.11636	1.07962	1.1138	1.16313	1.15648	1.01794	0.980597	0.824063
chr9:Ephb1		1.11659	1.11659	1.11659	1.11659	1.11659	1.11659	1.15508	1.12676	1.11761	1.14805	1.13065	1.11478	1.11096	1.06073	1.03194	1.03143	1.01418	0.956923	0.940039	0.92704	0.893837	0.863891	0.824979	0.77747	0.790267	0.770253	0.725795	0.704041	0.744163	0.751577	0.75423	0.734175	0.783871	0.791972	0.811007	0.809407	0.823546	0.870898	0.906952	0.923774	0.924702	0.918003	0.934065	0.917299	0.925046	0.939916	0.944861	0.926674
chr2:Mertk		1.11606	1.11606	1.11606	1.11606	1.11606	1.11606	1.12382	1.15013	1.11899	1.09139	1.03057	0.996099	1.01074	0.976035	1.00183	0.96554	0.929725	0.895483	0.840387	0.789115	0.77079	0.74161	0.720246	0.677624	0.687935	0.667324	0.671678	0.68898	0.740039	0.734759	0.790901	0.824357	0.824794	0.814273	0.841949	0.891157	0.929306	0.907322	0.917562	0.940161	0.949687	0.938075	0.907791	0.88205	0.860581	0.887096	0.81906	0.753385
chr13:Rreb1		1.11582	1.11582	1.11582	1.11582	1.11582	1.11582	1.21089	1.2445	1.17453	1.14354	1.05276	1.06134	1.0667	1.03861	0.993101	1.00849	0.975558	0.909008	0.757925	0.681882	0.690869	0.653548	0.639197	0.532079	0.485967	0.387792	0.375586	0.431812	0.426566	0.483713	0.622698	0.618816	0.629438	0.643717	0.713836	0.730458	0.712669	0.701294	0.783227	0.737489	0.732326	0.719658	0.805263	0.777257	0.856476	0.847336	0.795188	0.922194
chr5:Sun1		1.1158	1.1158	1.1158	1.1158	1.1158	1.1158	1.12799	1.11881	1.04303	0.999392	1.05834	0.962491	0.910702	0.962777	0.945312	1.0763	1.05971	0.91328	0.791914	0.836409	0.813248	0.76932	0.767163	0.79085	0.730169	0.798943	0.707969	0.813718	0.865006	0.816099	0.797604	0.839715	0.771167	0.72983	0.706873	0.72783	0.738496	0.67765	0.629539	0.64649	0.768034	0.761099	0.782023	0.860942	0.891017	0.898157	1.01642	1.00579
chr4:Epb41l4b		1.11418	1.11418	1.11418	1.11418	1.11418	1.11418	1.14361	1.17585	1.1568	1.08427	1.20675	1.20465	1.10078	1.0754	0.9767	0.946767	0.924049	0.982096	0.930274	0.933929	0.839253	0.685659	0.612601	0.717719	0.748046	0.820966	0.746223	0.809986	0.701447	0.738706	0.602683	0.70035	0.697152	0.737158	0.656616	0.593105	0.466104	0.59201	0.52149	0.498896	0.467254	0.614686	0.604545	0.702546	0.733074	0.741675	0.808469	0.810508
chr10:Cfap54		1.11221	1.11221	1.11221	1.11221	1.11221	1.11221	1.14303	1.13252	1.14533	1.14806	1.17236	1.17124	1.13861	1.09387	1.10702	1.07484	1.01253	0.96798	0.952169	0.920011	0.863338	0.822913	0.800903	0.778021	0.770172	0.687532	0.679846	0.684445	0.718403	0.711375	0.723505	0.769165	0.782	0.79337	0.873948	0.864395	0.928511	0.92508	0.966198	0.932556	0.937913	0.942572	0.959764	0.945484	0.940462	0.860696	0.85225	0.801114
chr2:Bmyc		1.11121	1.11121	1.11121	1.11121	1.11121	1.11121	1.1157	1.08065	0.880571	0.803593	0.742214	0.657358	0.680436	0.526418	0.516915	0.51634	0.498722	0.487297	0.454322	0.533223	0.653359	0.859957	0.917237	0.979415	1.0629	1.08485	1.10459	1.16698	1.20115	1.20186	1.18897	1.14799	1.09276	1.0804	1.00706	0.889399	0.804896	0.785678	0.795711	0.823432	0.791086	0.783524	0.721882	0.62188	0.716491	0.7897	0.777747	0.947931
chr6:Ndnf		1.10962	1.10962	1.10962	1.10962	1.10962	1.10962	1.06073	1.05231	1.08973	1.06387	1.04518	0.998797	1.04728	1.09625	1.04959	1.13041	1.11831	1.19974	1.22479	1.17976	1.17232	1.2538	1.29619	1.31685	1.28542	1.33725	1.23204	1.20596	1.14917	1.09961	0.983341	1.0111	0.874316	0.79515	0.676914	0.593873	0.517454	0.495808	0.480398	0.442948	0.418835	0.404551	0.298296	0.295624	0.251348	0.238717	0.218308	0.186252
chr7:Arhgap17		1.10863	1.10863	1.10863	1.10863	1.10863	1.10863	1.29719	1.36139	1.27894	1.32436	1.39645	1.5	1.40359	1.34527	1.21578	1.10081	1.06637	0.841456	0.733377	0.68456	0.584723	0.457307	0.271706	0.34492	0.352382	0.351574	0.53221	0.400338	0.497697	0.446173	0.463582	0.531482	0.676686	0.78354	0.851944	0.894027	0.87897	0.817378	0.925455	0.880715	1.0146	1.08711	1.02796	0.86187	0.765795	0.635103	0.667046	0.670249
chr3:Med12l		1.10841	1.10841	1.10841	1.10841	1.10841	1.10841	1.33651	1.27102	1.38904	1.45078	1.49666	1.5	1.5	1.44078	1.32172	1.10419	0.789336	0.574159	0.572911	0.433916	0.379797	0.135441	-0.0115898	-0.214635	-0.195844	-0.110173	-0.124543	-0.0565634	0.0928565	-0.0112261	0.117906	0.366022	0.680427	0.742298	0.871249	0.915997	0.974094	1.20814	1.19109	1.27844	1.5	1.44828	1.31731	1.33084	1.31972	1.25029	1.25152	1.19961
chr2:Strbp		1.1081	1.1081	1.1081	1.1081	1.1081	1.1081	1.19615	1.21234	1.20876	1.26234	1.33827	1.42483	1.42079	1.43529	1.46339	1.42451	1.33335	1.16921	1.02178	0.950784	0.785169	0.585542	0.433785	0.275755	0.190428	0.0848433	-0.0713874	0.0278762	0.0634411	0.0208872	0.101908	0.132601	0.180211	0.204837	0.373065	0.470031	0.608746	0.685964	0.677832	0.71575	0.836294	0.916977	1.00067	1.10202	1.20347	1.08996	1.02607	1.01039
chr19:Mxi1		1.10767	1.10767	1.10767	1.10767	1.10767	1.10767	1.10261	1.19562	1.23626	1.26021	1.2308	1.30939	1.28624	1.21727	1.18588	1.28565	1.22704	1.21343	1.13752	0.966342	0.926701	0.940561	0.689322	0.644696	0.582579	0.543186	0.427088	0.491862	0.471362	0.520035	0.563561	0.500969	0.450717	0.566491	0.605807	0.674907	0.721141	0.751331	0.651467	0.679022	0.603225	0.569414	0.666286	0.676178	0.743974	0.692257	0.645856	0.70817
chr9:Tpbg		1.10639	1.10639	1.10639	1.10639	1.10639	1.10639	1.07834	1.05093	1.03937	1.02702	1.07834	1.24813	1.32764	1.37285	1.26925	1.36139	1.3222	1.34149	1.27953	1.32383	1.30757	1.21601	1.12012	1.03166	0.945948	0.973938	0.885941	0.858928	0.776982	0.784436	0.747253	0.746193	0.740344	0.747668	0.810262	0.807142	0.776352	0.823969	0.797182	0.850683	0.839347	0.809851	0.773581	0.736135	0.667631	0.569302	0.520683	0.47787
chr2:Slc24a3		1.10628	1.10628	1.10628	1.10628	1.10628	1.10628	1.13008	1.15526	1.18345	1.18337	1.22941	1.23509	1.20565	1.17662	1.19757	1.13297	1.02351	0.918318	0.777203	0.645466	0.560713	0.416161	0.333059	0.23639	0.208069	0.198582	0.181565	0.224228	0.25237	0.271739	0.307195	0.358999	0.404972	0.501255	0.595182	0.654587	0.686483	0.751021	0.784553	0.793025	0.892236	0.944256	0.987066	1.06391	1.05925	1.0327	0.994255	0.956933
chr9:Tex264		1.10618	1.10618	1.10618	1.10618	1.10618	1.10618	1.11404	1.11479	0.985506	0.85701	0.883508	0.75175	0.839345	0.981103	0.890184	0.884924	0.790891	0.816459	0.898776	0.923948	1.02222	1.07506	1.05444	0.995303	0.867714	0.861663	0.867455	0.968849	0.877625	0.833317	0.970025	0.944271	1.0997	1.17218	1.10464	1.17479	1.19471	1.21991	1.11228	1.16208	1.1611	0.959895	0.956474	0.793266	0.728325	0.792994	0.654046	0.650044
chr16:Hunk		1.1052	1.1052	1.1052	1.1052	1.1052	1.1052	1.13346	1.17222	1.1279	1.30995	1.2004	1.17603	1.22889	1.20335	1.07482	1.04832	0.977773	0.825387	0.891314	0.817267	0.681063	0.814392	0.704028	0.530804	0.411202	0.546406	0.490459	0.406008	0.470168	0.360961	0.479983	0.536393	0.430989	0.568307	0.74474	0.807688	0.79787	0.960622	0.94961	1.00963	1.05504	0.975322	0.98279	1.0399	1.01641	0.866263	0.787742	0.80307
chr11:Grb10		1.10408	1.10408	1.10408	1.10408	1.10408	1.10408	1.14365	1.21988	1.22646	1.17356	1.23115	1.13824	1.14224	1.18238	1.21343	1.16338	1.1348	1.09189	1.01872	1.01804	1.05387	1.02846	1.06848	1.02858	1.01751	0.957694	0.993935	0.98509	0.990851	0.978253	0.954993	0.907186	0.829032	0.819062	0.794441	0.766974	0.782582	0.757781	0.709363	0.694276	0.745366	0.688598	0.672375	0.693753	0.659638	0.649553	0.61836	0.587528
chr7:Picalm		1.10403	1.10403	1.10403	1.10403	1.10403	1.10403	1.19135	1.23538	1.35743	1.26148	1.12671	1.1767	1.14441	1.1271	1.12045	0.989043	0.937305	0.837622	0.801808	0.672406	0.559151	0.490758	0.219927	0.263373	0.238053	0.22508	0.298223	0.359522	0.383438	0.437584	0.540848	0.696221	0.862228	1.00213	1.05101	1.10598	1.01195	0.941467	0.898176	0.871857	0.824992	0.628122	0.701272	0.740742	0.687262	0.689965	0.6868	0.751343
chr3:Dpyd		1.10401	1.10401	1.10401	1.10401	1.10401	1.10401	1.13308	1.10939	1.09906	1.06059	0.897615	0.883135	0.954235	0.89568	0.957218	0.77349	0.654391	0.692736	0.58549	0.498699	0.354434	0.247225	0.109527	0.108258	0.183871	0.0829701	0.126947	0.116615	0.0105574	0.0229406	0.150043	0.228118	0.222585	0.369495	0.250677	0.223094	0.267143	0.294608	0.468686	0.534109	0.528247	0.541733	0.676247	0.706505	0.635309	0.688809	0.688334	0.62702
chr14:Zfp395		1.10368	1.10368	1.10368	1.10368	1.10368	1.10368	1.22237	1.18059	1.2081	1.3176	1.30348	1.28821	1.2188	1.27079	1.02002	0.999677	1.01085	0.842315	0.758458	0.73006	0.732056	0.718665	0.705894	0.74421	0.736845	0.799708	0.627014	0.545093	0.609733	0.615448	0.603203	0.627685	0.577465	0.597799	0.506247	0.389082	0.47157	0.719797	0.780352	0.752029	0.896475	0.956222	0.798117	0.947476	0.923573	0.951292	0.985761	1.05332
chr1:Pid1		1.102	1.102	1.102	1.102	1.102	1.102	1.09232	1.07741	1.09066	1.15896	1.14737	1.14692	1.12227	1.11039	1.08247	1.09874	1.05867	1.02145	0.969397	0.887483	0.783467	0.707705	0.625752	0.595624	0.548699	0.525505	0.486518	0.49038	0.507265	0.524573	0.563603	0.620222	0.689252	0.752201	0.763687	0.807897	0.81072	0.862085	0.959683	0.991805	1.04854	1.09956	1.12161	1.13061	1.16496	1.17991	1.12684	1.11524
chr13:Larp4b		1.1011	1.1011	1.1011	1.1011	1.1011	1.1011	1.15789	1.1335	1.13545	1.04706	1.10098	1.00999	1.02571	0.947937	0.880728	0.954071	0.921921	0.898249	0.95552	0.868412	0.980121	0.880539	0.812559	0.726333	0.706594	0.71831	0.619556	0.581767	0.652754	0.667298	0.622402	0.619646	0.686359	0.862408	0.795142	0.803083	0.812284	0.919545	0.913532	0.867616	0.797887	0.897415	0.87776	0.878702	0.761648	0.811616	0.850099	0.928702
chr4:Ugcg		1.10035	1.10035	1.10035	1.10035	1.10035	1.10035	1.11456	1.04993	0.978479	0.993394	1.01144	0.895451	0.910015	0.908955	0.90821	0.871604	0.905155	0.907085	0.900353	0.914696	0.9227	0.875508	0.97379	0.891919	0.860706	0.84662	0.900868	0.842949	0.903484	0.976675	0.992403	1.01024	1.01796	0.968877	1.00255	1.00827	1.00119	0.892691	0.918387	0.842674	0.719484	0.724259	0.632218	0.643192	0.721499	0.725789	0.751792	0.815835
chr6:Grid2		1.09956	1.09956	1.09956	1.09956	1.09956	1.09956	1.13649	1.14551	1.168	1.20852	1.20364	1.20885	1.22124	1.22711	1.21094	1.18917	1.11146	1.03935	0.947635	0.844782	0.732278	0.641496	0.55154	0.478009	0.416809	0.338948	0.2936	0.288399	0.309489	0.330455	0.369251	0.42122	0.484707	0.57012	0.612893	0.678136	0.763617	0.822338	0.897611	0.954207	1.04008	1.09743	1.16009	1.17811	1.18203	1.2	1.17548	1.1237
chr6:Tcf7l1		1.0974	1.0974	1.0974	1.0974	1.0974	1.0974	1.09713	1.1157	1.02671	1.06367	1.07174	1.04946	1.00421	1.04185	1.03736	0.936634	0.899369	0.885591	0.787567	0.725439	0.630876	0.590539	0.536109	0.510424	0.386327	0.341208	0.410591	0.42567	0.409838	0.464653	0.4657	0.504388	0.540385	0.599657	0.633943	0.752292	0.834673	0.895369	0.907358	0.902289	0.854441	0.895251	0.94269	0.978482	0.98729	0.99332	0.969341	0.926989
chr2:Fmnl2		1.09676	1.09676	1.09676	1.09676	1.09676	1.09676	1.19488	1.1466	1.20758	1.2572	1.27412	1.26076	1.28131	1.29411	1.28251	1.21538	1.15868	1.10721	1.08322	0.975044	0.88297	0.807063	0.805173	0.758147	0.711717	0.713024	0.794622	0.797151	0.742554	0.779801	0.800326	0.81001	0.813887	0.769988	0.756333	0.751228	0.734524	0.728203	0.684661	0.785243	0.76994	0.728526	0.820012	0.881768	0.8506	0.845633	0.840163	0.864157
chr6:Abcg2		1.09524	1.09524	1.09524	1.09524	1.09524	1.09524	1.03861	1.00771	1.03091	0.945241	0.818321	0.806059	0.928186	0.956256	0.894781	1.11047	1.11226	1.08285	0.911875	1.0025	0.902594	1.02882	0.986467	0.798931	0.737263	0.870329	0.698692	0.714709	0.87772	0.913793	0.864895	0.84162	0.705192	0.599343	0.701761	0.543804	0.322252	0.221633	0.225197	0.169641	0.332493	0.298321	0.319847	0.210676	0.338005	0.358069	0.46126	0.753243
chr13:Pde4d		1.09516	1.09516	1.09516	1.09516	1.09516	1.09516	1.11966	1.10803	1.10159	1.11446	1.104	1.11249	1.10912	1.10353	1.12342	1.11994	1.06703	1.04033	1.04157	1.00923	0.944491	0.92159	0.898885	0.847405	0.838826	0.82692	0.814218	0.817336	0.81432	0.794225	0.808897	0.829616	0.851267	0.847359	0.8452	0.843839	0.848213	0.833889	0.858961	0.856463	0.861487	0.843305	0.847371	0.81756	0.820168	0.835472	0.808116	0.803633
chr17:Lama1		1.0936	1.0936	1.0936	1.0936	1.0936	1.0936	1.1676	1.23542	1.26206	1.20422	1.14952	1.09427	1.04512	1.06041	0.979041	0.979098	0.993275	0.88336	0.865558	0.851215	0.88728	0.771961	0.835573	0.916585	0.809103	0.838524	0.881639	0.903909	0.945211	0.936189	0.907126	0.874084	1.0411	1.01281	0.942645	1.03022	0.980837	0.99785	0.999808	0.953668	0.876366	0.831212	0.780261	0.803597	0.772436	0.748542	0.704361	0.743937
chr14:Fgf9		1.09334	1.09334	1.09334	1.09334	1.09334	1.09334	1.07263	1.02255	1.0448	1.05244	1.12011	1.01478	1.07038	1.06339	1.10701	1.07319	1.12761	1.08903	1.17974	1.05802	1.10523	1.01296	1.07476	0.942617	0.952248	0.920511	0.912107	0.887378	0.887547	0.832806	0.925417	0.896362	0.927878	0.894715	0.988626	0.899118	0.922686	0.882122	0.828732	0.861327	0.780785	0.696758	0.735577	0.736548	0.693153	0.627028	0.685919	0.669806
chr19:Gnaq		1.09305	1.09305	1.09305	1.09305	1.09305	1.09305	1.10383	1.12162	1.16838	1.16999	1.2062	1.18819	1.20174	1.13548	1.07896	1.084	1.09244	1.07954	1.0648	0.881468	0.846734	0.820367	0.717495	0.6976	0.671468	0.68996	0.629212	0.632864	0.634504	0.507884	0.649422	0.636872	0.689938	0.810325	0.820258	0.815597	0.885034	0.846335	0.895962	0.834076	0.964822	0.856568	0.88252	0.815823	0.735205	0.710563	0.75575	0.778874
chr12:Nin		1.09098	1.09098	1.09098	1.09098	1.09098	1.09098	1.12189	1.12508	1.0965	1.05277	1.02944	0.96877	0.97076	0.968614	0.991214	0.949921	0.937163	0.927182	0.915013	0.886867	0.846821	0.819793	0.779702	0.738739	0.668393	0.628778	0.636709	0.657845	0.667118	0.635301	0.662436	0.743466	0.799461	0.856982	0.907992	0.957611	0.962038	0.945291	0.935063	0.932128	0.968202	0.918404	0.849247	0.808496	0.806296	0.765946	0.757688	0.752627
chr10:Grip1		1.09061	1.09061	1.09061	1.09061	1.09061	1.09061	1.17493	1.32781	1.34305	1.41638	1.23631	1.18198	1.26667	1.34273	1.30987	1.28026	1.13014	1.08441	0.897739	0.719661	0.424049	0.336633	0.33489	0.310071	0.208255	0.00991493	-0.101333	-0.227734	-0.289257	-0.351004	-0.436366	-0.457598	-0.585076	-0.639743	-0.742662	-0.872726	-0.777454	-0.752177	-0.776286	-0.960804	-0.951462	-1.15584	-1.10733	-1.12152	-1.21395	-1.5	-1.38803	-1.5
chr14:Rhobtb2		1.0903	1.0903	1.0903	1.0903	1.0903	1.0903	1.08975	1.11061	1.07378	1.03526	1.06458	1.00281	1.0182	1.05727	1.08862	1.01599	0.939188	0.930226	0.887726	0.790198	0.81821	0.720189	0.812787	0.715375	0.702058	0.666776	0.793024	0.748981	0.750859	0.750883	0.810346	0.820377	0.86309	0.858143	0.899328	0.898194	0.898771	0.910844	1.00884	1.04419	0.969001	0.958879	0.933172	0.962818	0.991536	1.03451	1.01103	0.95594
chrX:Mageh1		1.08928	1.08928	1.08928	1.08928	1.08928	1.08928	1.19568	1.21173	1.24694	1.17234	1.17709	1.22258	1.26583	1.23655	1.30316	1.26861	1.21041	1.1106	1.01834	1.02019	1.10145	1.08441	1.10656	0.959782	1.00245	0.953514	0.946987	0.94616	0.867868	0.864896	0.765415	0.705803	0.685096	0.643043	0.681675	0.576426	0.612787	0.616689	0.613527	0.6394	0.56574	0.607302	0.628348	0.703876	0.687447	0.637938	0.65885	0.598151
chr8:Tusc3		1.08881	1.08881	1.08881	1.08881	1.08881	1.08881	0.979008	0.764922	0.818812	1.16028	1.09379	1.12167	1.20377	1.19068	1.1352	0.985987	1.0651	1.28434	1.40147	1.46113	1.27833	1.26505	1.30674	1.25417	1.14569	1.18942	1.0831	1.0438	0.94598	0.818353	0.796204	0.802524	0.787147	0.78247	0.78195	0.767624	0.75304	0.856162	0.829895	0.724705	0.833225	0.722302	0.820139	0.786549	0.685506	0.517105	0.49595	0.375289
chr6:Smo		1.08821	1.08821	1.08821	1.08821	1.08821	1.08821	1.0352	1.06238	0.888621	0.983504	0.812983	1.02095	1.0853	0.982872	1.05448	1.11788	1.01997	0.851266	0.684871	0.743041	0.643852	0.727546	0.515777	0.461037	0.516832	0.372704	0.300923	0.31359	0.331034	0.417424	0.303011	0.498533	0.440506	0.496465	0.43996	0.474135	0.676311	0.573532	0.750218	0.870607	0.885396	1.2148	1.10214	1.0745	1.05443	1.20663	1.22427	1.10044
chr8:Maf		1.08694	1.08694	1.08694	1.08694	1.08694	1.08694	1.06625	1.06112	1.12243	1.05063	0.981792	0.943729	0.993658	0.966885	0.889096	0.903373	0.975595	1.03641	1.03284	0.934583	1.02844	1.119	1.16102	1.12752	1.19874	1.2565	1.20365	1.11077	1.06219	1.07152	1.02383	0.942833	0.817814	0.836246	0.801263	0.652087	0.625934	0.63941	0.617541	0.597036	0.598997	0.638838	0.692334	0.651207	0.591206	0.587031	0.62726	0.653159
chr4:Ccnl2		1.08599	1.08599	1.08599	1.08599	1.08599	1.08599	1.04723	1.01523	1.28698	1.37994	1.5	1.35955	1.39165	1.48125	1.4836	1.22949	1.14339	1.0232	0.922866	0.637065	0.420292	0.137975	0.0389025	0.0372768	-0.157468	-0.267521	-0.241024	-0.311073	-0.176046	-0.207743	-0.109073	-0.00325863	0.0766789	0.193724	0.252132	0.598326	0.786977	0.768999	0.962393	1.01711	1.0383	1.10139	1.1876	1.09289	1.21163	1.0396	0.806691	0.697342
chr5:Zfp951		1.08519	1.08519	1.08519	1.08519	1.08519	1.08519	1.17773	1.2659	1.31376	1.29182	1.34019	1.2442	1.17771	1.20277	1.06451	1.03623	0.982477	0.885909	0.909556	0.923119	0.853759	0.766555	0.79908	0.828934	0.753896	0.871842	0.858401	0.827635	0.848878	0.786906	0.774752	0.852918	0.858899	0.87745	0.889517	0.893681	0.898581	0.925473	0.967992	0.924665	0.893127	0.832917	0.810562	0.867265	0.805834	0.822832	0.867969	0.815389
chr19:Mamdc2		1.08397	1.08397	1.08397	1.08397	1.08397	1.08397	1.03492	1.04016	0.976737	1.00505	0.992539	1.03699	1.12485	1.13157	1.14936	1.14327	1.0659	1.0228	1.03717	0.982877	0.93341	0.909733	0.867758	0.793103	0.701377	0.644351	0.5896	0.60052	0.645623	0.592665	0.67113	0.706681	0.741749	0.765116	0.812357	0.946127	0.95447	1.04858	1.12012	1.10911	1.09111	1.04132	1.04489	1.0357	1.00077	0.985578	0.849256	0.841749
chr12:Sipa1l1		1.08304	1.08304	1.08304	1.08304	1.08304	1.08304	1.11411	1.0858	1.09391	1.11302	1.15942	1.15258	1.1546	1.11987	1.10795	1.16851	1.13658	1.07927	1.03242	1.00754	0.954337	0.856542	0.803196	0.740753	0.768473	0.716315	0.6501	0.632704	0.598432	0.633168	0.652286	0.634378	0.70253	0.757904	0.837708	0.844153	0.845281	0.888649	0.902397	0.958733	0.998764	0.972841	0.990609	0.970648	0.953455	0.879047	0.857104	0.842789
chr19:Plce1		1.08235	1.08235	1.08235	1.08235	1.08235	1.08235	1.15521	1.18397	1.21384	1.19876	1.22819	1.1793	1.17678	1.13083	1.16338	1.10589	1.0255	0.924916	0.843452	0.755281	0.712736	0.587899	0.491811	0.43572	0.44832	0.368478	0.394303	0.396757	0.377738	0.35563	0.363699	0.396667	0.448347	0.502889	0.47885	0.489454	0.552423	0.602947	0.616833	0.673196	0.736823	0.738922	0.702143	0.690306	0.689201	0.72816	0.689616	0.639872
chr19:Sorcs1		1.08223	1.08223	1.08223	1.08223	1.08223	1.08223	1.0933	1.09983	1.05963	1.08794	1.05518	1.00296	1.00928	0.962773	0.972287	0.986975	0.997626	1.00235	0.96386	0.982405	0.936994	0.921197	0.905893	0.873023	0.848697	0.869352	0.841176	0.835032	0.83911	0.834743	0.821393	0.803031	0.787038	0.746497	0.680538	0.656781	0.616482	0.562075	0.52587	0.500906	0.522804	0.444591	0.405961	0.408599	0.432199	0.479226	0.468889	0.496919
chr4:AI314180		1.0816	1.0816	1.0816	1.0816	1.0816	1.0816	1.2107	1.18958	1.23944	1.31074	1.32508	1.48578	1.49682	1.5	1.5	1.45557	1.45504	1.37723	1.25659	1.14956	0.905182	0.835708	0.675884	0.654928	0.511743	0.362263	0.34686	0.307694	0.358138	0.511527	0.490017	0.699104	0.715104	0.735531	0.836161	0.937729	1.0296	1.03833	1.13196	1.11882	1.09585	1.01835	0.903006	0.918147	0.81484	0.734103	0.68911	0.627463
chr5:Ttyh3		1.08136	1.08136	1.08136	1.08136	1.08136	1.08136	1.07234	1.11693	1.10488	1.08614	0.994736	0.976415	0.967353	0.903386	0.922047	0.882634	0.875046	0.85215	0.809863	0.849913	0.824638	0.871459	0.864993	0.877813	0.855298	0.80115	0.800391	0.823399	0.8191	0.841745	0.848909	0.861255	0.90408	0.903576	0.883348	0.920549	1.01978	1.06514	1.01755	1.06986	1.04031	0.979186	0.986169	0.971973	1.0043	1.00704	0.973691	0.861233
chr16:Atp13a4		1.07866	1.07866	1.07866	1.07866	1.07866	1.07866	1.10233	1.14492	1.10963	1.09301	1.13028	1.19627	1.18704	1.17758	1.13608	1.09311	1.06769	1.05444	1.11288	1.12231	1.1586	1.12415	1.12961	1.1272	1.10813	1.10919	1.08987	1.09765	1.09535	0.991647	0.913208	0.83845	0.800123	0.774399	0.766257	0.717987	0.699295	0.694311	0.669068	0.647765	0.644246	0.70023	0.719998	0.683543	0.641876	0.641872	0.671549	0.675963
chr9:Gm11149		1.07859	1.07859	1.07859	1.07859	1.07859	1.07859	1.06268	1.0524	1.106	1.14095	1.18083	1.15719	1.18895	1.24728	1.17168	1.12813	0.948879	0.968607	0.90375	0.815833	0.772951	0.684239	0.675697	0.661112	0.557037	0.558829	0.54098	0.641938	0.595874	0.651731	0.844343	0.862281	0.903254	0.881532	0.934111	1.06727	1.13874	1.22	1.28474	1.31144	1.26192	1.119	1.1286	1.05257	0.973732	0.829855	0.679574	0.558218
chr15:Asap1		1.07851	1.07851	1.07851	1.07851	1.07851	1.07851	1.13799	1.09501	1.07292	1.13682	1.12619	1.05268	0.867142	0.993468	0.997569	1.05258	1.06003	0.997139	1.02649	0.971326	0.759929	0.580587	0.557757	0.547848	0.396026	0.397945	0.317668	0.228124	0.24484	0.208934	0.423237	0.68117	0.881911	0.896204	0.857166	0.805799	0.768031	0.735005	0.715911	0.742406	0.83944	0.75791	0.579332	0.416915	0.532824	0.559756	0.634024	0.619058
chrX:Ftx		1.07741	1.07741	1.07741	1.07741	1.07741	1.07741	1.32219	1.39383	1.5	1.5	1.5	1.5	1.5	1.5	1.5	1.48446	1.43399	1.15352	0.98626	0.937356	0.759879	0.541328	0.440153	0.538624	0.487923	0.277079	0.28518	0.298137	0.332933	0.482562	0.394475	0.517248	0.666642	0.646461	0.500976	0.553777	0.563628	0.604318	0.626292	0.716809	0.724529	0.73767	0.608562	0.625035	0.647833	0.654181	0.692831	0.725669
chr16:Itgb5		1.07705	1.07705	1.07705	1.07705	1.07705	1.07705	1.11331	1.06835	0.981016	0.998789	0.981624	0.899425	0.818948	0.784806	0.790054	0.817065	0.776749	0.745126	0.833441	0.861545	0.906867	0.905025	0.950159	0.994291	1.09697	1.05223	1.07491	1.05929	1.01843	0.903444	0.901112	0.876345	0.889431	0.810833	0.819483	0.765285	0.81784	0.782388	0.84319	0.863417	0.960931	0.968298	0.879834	0.89005	1.00693	0.98966	0.946856	0.935269
chr15:Hdac7		1.07667	1.07667	1.07667	1.07667	1.07667	1.07667	1.11397	1.10615	1.14071	1.01685	1.0342	1.04311	1.10803	1.02014	1.02428	0.967594	0.886793	0.859361	0.844561	0.747427	0.760426	0.686622	0.638517	0.543641	0.453444	0.438335	0.399086	0.479732	0.459042	0.407968	0.443991	0.400663	0.414774	0.517576	0.574739	0.696966	0.743005	0.843091	0.890565	0.887914	1.01164	1.02405	1.08886	1.11344	1.09387	1.08943	1.05891	1.00283
chr7:Snrnp70		1.07649	1.07649	1.07649	1.07649	1.07649	1.07649	1.34115	1.32684	1.31616	1.29936	1.20886	1.26133	1.30688	1.215	1.32085	1.32492	1.10745	0.903466	0.769732	0.697018	0.492811	0.392763	0.0952911	-0.166151	-0.25827	-0.498294	-0.594477	-0.576785	-0.541665	-0.565106	-0.438599	-0.345014	-0.418766	-0.275975	-0.126751	-0.108117	0.0782585	0.134846	0.199786	0.238624	0.351825	0.281686	0.252384	0.416097	0.424336	0.305269	0.244509	0.0433676
chr18:Sema6a		1.07461	1.07461	1.07461	1.07461	1.07461	1.07461	1.24587	1.30709	1.33769	1.38989	1.45978	1.44918	1.42441	1.47295	1.43828	1.41203	1.42446	1.25503	1.19303	1.07649	0.9305	0.794492	0.745726	0.637085	0.541331	0.558506	0.510128	0.424064	0.505366	0.465948	0.547813	0.610971	0.706947	0.737555	0.826839	0.905363	0.882464	0.999568	0.973143	0.925362	1.05283	1.04497	1.01223	0.983798	0.902972	0.823001	0.688966	0.628184
chr7:Polg		1.07319	1.07319	1.07319	1.07319	1.07319	1.07319	1.14007	1.18234	1.24439	1.36094	1.25987	1.30602	1.35285	1.29493	1.33558	1.2694	1.10979	1.03694	0.978368	0.91648	0.773697	0.664071	0.496318	0.470238	0.416887	0.29383	0.35809	0.440015	0.365557	0.413255	0.470525	0.476934	0.611346	0.816102	0.770987	0.781073	0.943597	0.991809	0.992835	1.07321	1.01453	0.952825	1.04161	0.991806	0.867562	0.729387	0.754016	0.583076
chr7:Spcs2		1.07287	1.07287	1.07287	1.07287	1.07287	1.07287	0.924535	0.87303	0.939758	0.940061	0.932319	1.06742	1.26049	1.33502	1.39663	1.38706	1.37541	1.40281	1.5	1.36482	1.39747	1.24045	1.07896	0.975951	0.849796	0.768092	0.805486	0.762977	0.807733	0.821497	0.775882	0.841646	0.896922	0.944196	0.962275	0.973771	0.896984	0.835536	0.96254	0.877803	0.660996	0.785314	0.639927	0.531056	0.463094	0.299764	0.239245	0.158555
chr13:Txndc15		1.07211	1.07211	1.07211	1.07211	1.07211	1.07211	1.02441	1.01313	0.966624	0.969762	1.10353	1.05134	1.13481	1.18657	1.04107	0.9539	1.13716	1.15144	1.2046	1.32038	1.33221	1.30791	1.29346	1.13951	1.07929	1.07119	1.15441	1.00815	0.897244	0.82325	0.631427	0.715182	0.63723	0.609792	0.710998	0.794933	0.798118	0.660869	0.610243	0.626548	0.637603	0.801538	0.608275	0.512117	0.427524	0.245015	0.0412932	-0.148742
chr9:Stt3b		1.07195	1.07195	1.07195	1.07195	1.07195	1.07195	1.05088	1.05833	1.08291	1.13483	1.14132	1.21349	1.18307	1.21378	1.21658	1.21284	1.13554	1.07277	0.999228	0.88144	0.832606	0.791306	0.677372	0.644542	0.635218	0.585122	0.525781	0.525349	0.569583	0.625638	0.68579	0.75772	0.81553	0.882332	0.924839	0.959738	1.03606	1.09654	1.17527	1.17036	1.14817	1.12201	1.08148	1.04665	0.993169	0.951084	0.893922	0.78987
chr4:Ephb2		1.07123	1.07123	1.07123	1.07123	1.07123	1.07123	0.930763	0.916989	0.842446	1.01678	1.01671	1.02701	0.915743	0.976204	0.748333	0.444148	0.344689	0.276074	-0.0889198	-0.317636	-0.806729	-1.16524	-1.44048	-1.5	-1.5	-1.5	-1.5	-1.5	-1.5	-1.25495	-0.877223	-0.506383	-0.384285	-0.109343	0.285405	0.651703	0.952954	1.00628	1.04985	1.19009	1.25065	1.2499	1.24449	1.4929	1.5	1.5	1.28857	1.32219
chr18:Garem		1.07066	1.07066	1.07066	1.07066	1.07066	1.07066	1.11058	1.12652	1.0847	1.09856	1.06214	1.046	1.07679	0.99912	1.02586	1.04619	1.04208	1.05073	0.981746	0.936152	0.813137	0.762384	0.723308	0.617361	0.640631	0.603325	0.570276	0.541353	0.525	0.512252	0.546828	0.579498	0.633054	0.640487	0.733868	0.780665	0.7926	0.728459	0.754224	0.755952	0.834815	0.830998	0.8468	0.832429	0.834749	0.825936	0.788166	0.787081
chr11:Pafah1b1		1.06815	1.06815	1.06815	1.06815	1.06815	1.06815	1.19695	1.40389	1.17155	1.18092	1.13585	1.22412	1.15889	1.27165	1.5	1.5	1.5	1.5	1.2966	1.43699	1.30148	1.20357	0.889728	0.698125	0.715009	0.416333	0.295234	0.394907	0.380887	0.166667	0.0688063	0.0412537	0.137313	0.290824	0.527106	0.503402	0.423835	0.524942	0.369393	0.195878	0.380208	0.437455	0.509898	0.426978	0.381111	0.230656	-0.0875037	0.223303
chr1:Pard3bos1		1.06768	1.06768	1.06768	1.06768	1.06768	1.06768	1.08317	1.00245	0.95725	0.881857	0.966942	0.819017	0.942199	0.965766	0.976992	0.873633	0.898142	0.90423	0.837578	0.915554	0.924112	0.878104	0.957009	0.876793	0.764684	0.634079	0.638924	0.608173	0.670416	0.679833	0.535472	0.657303	0.741336	0.736499	0.751572	0.844111	1.00024	1.11321	1.14001	1.07677	1.09759	1.20833	1.23432	1.15668	1.19003	1.10762	1.05823	1.00094
chr12:Rgs6		1.06667	1.06667	1.06667	1.06667	1.06667	1.06667	1.05837	1.04162	1.00359	1.01585	0.986964	0.949671	0.943413	0.929429	0.917767	0.88265	0.87323	0.872727	0.863492	0.846867	0.823338	0.813479	0.803955	0.80317	0.792565	0.790492	0.813948	0.841807	0.86207	0.889518	0.902453	0.899257	0.910571	0.911421	0.893465	0.918039	0.914556	0.885407	0.884449	0.860514	0.841269	0.822568	0.813603	0.828216	0.821983	0.840114	0.807355	0.797118
chr16:Nrip1		1.06667	1.06667	1.06667	1.06667	1.06667	1.06667	0.871094	0.863373	0.898936	1.05095	1.09279	0.996108	1.10243	1.01116	0.98354	0.859107	0.82521	0.93696	0.925492	0.966276	0.881665	0.840498	1.00277	0.964657	0.946473	1.05764	1.12025	1.1648	1.2534	1.16901	1.11714	1.13066	1.12896	0.914391	0.801241	0.853365	0.734414	0.654137	0.540927	0.312806	0.374616	0.247711	0.221737	0.221948	0.274762	0.423158	0.444563	0.556286
chr11:Abca8a		1.0662	1.0662	1.0662	1.0662	1.0662	1.0662	1.07528	1.06136	1.04455	1.05084	1.05852	1.02855	1.02356	1.01118	1.00813	1.01888	1.04001	1.04002	1.04441	1.04693	1.05697	1.05319	1.07605	1.07826	1.08713	1.08402	1.06811	1.03563	1.02374	0.998837	0.982299	0.952727	0.928719	0.894568	0.871078	0.84802	0.826888	0.825636	0.8164	0.807599	0.800269	0.775352	0.765094	0.758014	0.753132	0.747248	0.730861	0.720559
chr19:Trpm3		1.06436	1.06436	1.06436	1.06436	1.06436	1.06436	1.0901	1.1029	1.13148	1.18551	1.20106	1.18401	1.21174	1.20058	1.20135	1.17251	1.12033	1.03249	0.909085	0.777994	0.601633	0.494123	0.396618	0.258002	0.197905	0.120156	0.0793853	0.0572515	0.0902663	0.144308	0.185946	0.280233	0.351543	0.403585	0.493015	0.580822	0.639483	0.710987	0.761974	0.777953	0.796657	0.809901	0.841842	0.836402	0.841444	0.808613	0.721153	0.651055
chr5:Wasf3		1.06419	1.06419	1.06419	1.06419	1.06419	1.06419	1.11026	1.13469	1.28247	1.19396	1.29089	1.36972	1.33997	1.31951	1.30926	1.28098	1.21102	1.07633	0.939615	0.659339	0.599016	0.389015	0.241527	0.223387	0.206535	0.123183	0.122523	0.123587	0.173898	0.147073	0.336308	0.456151	0.590254	0.622479	0.663211	0.699078	0.731264	0.782898	0.848036	0.850173	0.962612	0.811044	0.752793	0.770481	0.816362	0.780174	0.693818	0.688266
chr8:Slc7a2		1.06335	1.06335	1.06335	1.06335	1.06335	1.06335	1.06681	1.07621	1.08263	1.09055	1.05875	1.03477	1.05955	1.03703	1.00783	1.0134	1.04037	1.02195	1.0265	0.98062	0.987543	1.01925	1.01383	1.023	1.00592	1.01448	0.988812	0.921658	0.933952	0.91053	0.905485	0.883615	0.91022	0.870845	0.845552	0.859944	0.842455	0.836174	0.84132	0.798725	0.772787	0.768487	0.775244	0.723107	0.717558	0.711185	0.688417	0.734841
chr10:Pawr		1.06252	1.06252	1.06252	1.06252	1.06252	1.06252	1.12032	1.14112	1.16585	1.18553	1.1568	1.11704	1.20116	1.20007	1.10727	1.10739	1.16237	1.0925	0.977909	0.864741	0.684845	0.660243	0.692785	0.606014	0.509954	0.468818	0.470816	0.362253	0.33776	0.323738	0.331381	0.425132	0.429954	0.396894	0.416413	0.380496	0.399931	0.378857	0.288197	0.232362	0.325415	0.329025	0.30497	0.230908	0.284321	0.286279	0.290709	0.314854
chr1:4930523C07Rik		1.06076	1.06076	1.06076	1.06076	1.06076	1.06076	1.01092	1.02908	0.961125	0.935495	0.883328	0.948556	1.01987	0.933345	0.999859	1.05857	1.10829	1.1942	1.28836	1.29996	1.23505	1.21784	1.13369	1.08273	1.14642	1.14012	1.02427	1.05528	0.92453	0.882212	0.898559	0.953745	0.942074	0.917859	0.926767	0.867589	0.829698	0.892182	0.818676	0.828227	0.752505	0.712069	0.638377	0.64971	0.689874	0.58376	0.563894	0.506378
chr6:Ccdc136		1.06065	1.06065	1.06065	1.06065	1.06065	1.06065	1.09652	1.01696	1.01476	1.02855	1.17115	1.29354	1.42169	1.34235	1.27166	1.31989	1.31572	1.30218	1.1819	0.980358	0.801156	0.689538	0.649343	0.593353	0.605805	0.515371	0.560832	0.48553	0.426441	0.392952	0.551009	0.658436	0.638353	0.665652	0.711138	0.698914	0.759858	0.683491	0.795678	0.781876	0.862958	0.905786	0.955267	1.06316	1.03979	1.03787	1.03093	1.10222
chr15:Zhx2		1.0581	1.0581	1.0581	1.0581	1.0581	1.0581	1.10858	1.06732	1.0896	1.03834	0.906773	0.876268	0.813658	0.903989	0.858801	0.776782	0.751134	0.69658	0.640287	0.524975	0.507571	0.526593	0.458746	0.372265	0.300989	0.365789	0.409073	0.359444	0.314679	0.387285	0.451551	0.532179	0.638512	0.736849	0.892344	1.0107	1.09845	1.11676	1.2237	1.35223	1.38083	1.42896	1.41245	1.44363	1.44557	1.38648	1.27197	1.1933
chr10:Adamtsl5		1.056	1.056	1.056	1.056	1.056	1.056	1.09361	1.00076	1.05311	1.13239	1.10599	1.15117	1.0909	1.05977	1.09819	1.12121	1.11519	1.11082	1.10333	1.15502	1.11464	1.08746	1.06303	1.03442	1.01322	0.977514	0.952686	0.888988	0.895072	0.850555	0.736482	0.697433	0.791389	0.807654	0.835212	0.80048	0.836098	0.809181	0.817969	0.79051	0.736445	0.68035	0.72979	0.686082	0.684062	0.71479	0.658772	0.575054
chr11:Acsl6		1.0559	1.0559	1.0559	1.0559	1.0559	1.0559	1.09771	1.12413	1.16134	1.14098	1.12131	1.23698	1.29594	1.26664	1.19494	1.28208	1.21488	1.08308	1.03715	1.04953	1.01403	0.984988	0.794638	0.663051	0.626837	0.534771	0.4217	0.400715	0.506016	0.509642	0.501062	0.514066	0.547286	0.725474	0.742718	0.851676	1.03327	1.14456	1.26172	1.20145	1.2184	1.2164	1.15705	1.18938	1.09546	1.0673	1.0085	0.739102
chr16:Usp25		1.05503	1.05503	1.05503	1.05503	1.05503	1.05503	1.12347	1.22616	1.20019	1.08297	1.01096	0.92665	0.99261	1.13409	1.02625	0.89202	1.00392	0.935315	0.756354	0.692788	0.739931	0.816482	0.823271	0.6833	0.564342	0.555304	0.551561	0.642721	0.630967	0.767707	0.7977	0.744532	0.595974	0.454186	0.512477	0.41225	0.314317	0.312392	0.203455	0.122484	0.0233116	0.0755539	0.0978756	0.18846	0.3585	0.303058	0.376942	0.39781
chr7:Rbbp6		1.05261	1.05261	1.05261	1.05261	1.05261	1.05261	1.21359	0.872387	0.753815	0.91048	1.05087	0.980291	1.02902	1.1026	1.11532	1.20471	0.981298	0.882378	0.84294	0.943888	0.61128	0.328792	0.0561731	-0.097256	-0.412717	-0.403626	-0.660059	-0.841855	-0.95473	-0.916205	-1.02389	-0.84322	-0.56627	-0.223575	0.0704277	0.534151	0.706347	0.871557	1.06973	1.06772	1.32082	1.5	1.5	1.5	1.5	1.5	1.4926	1.42059
chr19:2700081O15Rik		1.05231	1.05231	1.05231	1.05231	1.05231	1.05231	1.08444	1.18215	1.19351	1.11427	1.09083	1.06021	1.10267	1.24571	1.22793	1.1383	1.07979	1.04479	0.956783	0.839302	0.868227	0.853747	0.762969	0.753987	0.555641	0.617778	0.632227	0.708196	0.732112	0.761409	0.821346	0.723537	0.788743	0.988625	0.917392	1.04069	0.924207	1.01358	0.964418	0.909637	0.931946	0.868751	0.941497	0.898712	0.825122	0.759894	0.836396	0.885789
chrX:Il1rapl1		1.05202	1.05202	1.05202	1.05202	1.05202	1.05202	1.07697	1.10083	1.01718	0.991927	0.91612	0.798299	0.831643	0.761979	0.888478	0.89959	0.831665	0.873049	0.770846	0.694436	0.727451	0.660839	0.629585	0.676188	0.694272	0.588866	0.515966	0.558281	0.566895	0.663766	0.734432	0.790409	0.789112	0.821886	0.811149	0.816582	0.857973	0.873207	0.830628	0.768482	0.731703	0.663323	0.634553	0.732875	0.763644	0.778254	0.919691	0.951908
chr17:Pde10a		1.05194	1.05194	1.05194	1.05194	1.05194	1.05194	1.0427	0.993314	1.05768	1.06423	1.03824	0.998866	0.980553	0.997526	0.994416	0.976088	1.01449	1.00773	1.0772	1.06085	1.1403	1.13766	1.22598	1.22706	1.21303	1.21926	1.23448	1.20351	1.20045	1.18388	1.12858	1.05635	1.05341	0.987655	0.950642	0.913175	0.852244	0.792072	0.767401	0.682029	0.646567	0.661661	0.625964	0.61875	0.621736	0.603203	0.573315	0.534906
chr2:Sirpa		1.0512	1.0512	1.0512	1.0512	1.0512	1.0512	0.998306	1.0018	1.07021	1.11892	1.11158	1.07337	1.06232	1.06772	0.985651	1.00568	1.01298	0.99588	1.07184	0.969304	0.901998	0.928756	1.00389	0.980152	0.975684	0.952698	0.87347	0.827746	0.789874	0.74517	0.739163	0.755956	0.69307	0.623918	0.573587	0.581702	0.628236	0.625745	0.609438	0.647597	0.631698	0.664476	0.751212	0.846103	0.855505	0.939444	0.943886	0.91945
chr11:Sh3pxd2b		1.05012	1.05012	1.05012	1.05012	1.05012	1.05012	1.05635	1.02359	1.02191	1.02942	0.997914	0.967948	0.954872	0.921348	0.924183	0.92668	0.91896	0.901114	0.897092	0.905307	0.914837	0.928567	0.960916	0.948776	0.949513	0.953705	0.944411	0.983304	0.973992	0.967048	0.963147	0.93846	0.936879	0.933631	0.967464	0.976664	0.957641	0.934756	0.941645	0.973218	0.962888	0.955283	0.927118	0.922101	0.877469	0.883567	0.847347	0.827607
chr13:C130071C03Rik		1.05007	1.05007	1.05007	1.05007	1.05007	1.05007	1.00883	1.04353	1.10483	1.16937	1.21675	1.19299	1.33763	1.3392	1.3747	1.35363	1.24825	1.20138	1.1711	1.12676	0.961174	0.925226	0.88723	0.821609	0.716756	0.624127	0.613914	0.624258	0.682012	0.669397	0.607997	0.665455	0.698405	0.711609	0.719145	0.757048	0.846196	0.877557	0.959431	0.888707	0.90479	0.949455	0.916805	0.901377	0.974625	1.00693	0.947997	0.897548
chrX:Tspan7		1.04755	1.04755	1.04755	1.04755	1.04755	1.04755	1.01928	0.998359	0.959657	0.948121	0.965454	0.950784	0.949013	0.972012	0.973029	0.945662	0.953016	0.969064	1.0552	1.08029	1.11037	1.12932	1.15944	1.18078	1.17567	1.20557	1.18396	1.13092	1.15843	0.985128	0.903096	0.899201	0.818212	0.76278	0.769845	0.727004	0.643089	0.646329	0.675802	0.581986	0.610232	0.640844	0.543512	0.559814	0.587809	0.522921	0.481054	0.487781
chr9:Pias1		1.04732	1.04732	1.04732	1.04732	1.04732	1.04732	1.20345	1.0776	1.23289	1.4723	1.37417	1.5	1.5	1.29496	1.44608	1.24168	1.08829	0.904328	1.02205	0.848577	0.877258	0.872086	0.446971	0.550324	0.777932	0.377346	0.400261	0.108519	0.0388202	0.0186583	0.0294178	-0.181029	-0.141131	-0.0607574	0.114088	0.0710017	0.112164	0.385734	0.655858	0.874276	0.824119	0.88901	1.01802	1.05551	1.29192	1.03026	0.876507	0.875974
chr2:Scai		1.04705	1.04705	1.04705	1.04705	1.04705	1.04705	1.13235	1.19357	1.34003	1.47796	1.5	1.5	1.5	1.5	1.29444	1.49303	1.25208	1.29917	1.15082	0.934313	0.483539	0.104514	-0.0682985	-0.216864	-0.288773	-0.228518	-0.707514	-0.701953	-0.847053	-0.993297	-0.567488	-0.565502	-0.411956	-0.20776	-0.236005	-0.290678	-0.317967	0.0361294	0.0380392	-0.0204951	-0.0946124	-0.43336	-0.193817	-0.443611	-0.644941	-0.578392	-0.506837	-0.36997
chr2:Nr6a1		1.04573	1.04573	1.04573	1.04573	1.04573	1.04573	1.187	1.22625	1.0564	1.08685	1.13873	1.30955	1.38998	1.34962	1.41545	1.40206	1.30944	0.99641	0.91354	0.832986	0.763061	0.593145	0.328054	0.112761	-0.0927005	-0.201917	-0.234778	-0.280726	-0.111235	-0.0630843	0.0313852	0.168954	0.346612	0.456898	0.569066	0.788889	0.85233	0.90303	0.867345	0.960844	1.04654	1.05715	1.09513	1.08462	1.03269	1.14094	0.918797	1.00008
chr18:Cdh2		1.04573	1.04573	1.04573	1.04573	1.04573	1.04573	1.03963	1.04876	1.05645	1.07018	1.04118	1.03376	1.03382	1.01714	1.02269	1.01841	0.933775	0.909511	0.862385	0.798542	0.682715	0.65138	0.585846	0.571606	0.546132	0.496609	0.458173	0.4935	0.491367	0.502568	0.553799	0.586483	0.652905	0.717924	0.762322	0.770038	0.789412	0.817558	0.829129	0.83054	0.854695	0.801314	0.874958	0.905234	0.891904	0.849206	0.854163	0.84411
chr13:Phactr1		1.0456	1.0456	1.0456	1.0456	1.0456	1.0456	1.05122	1.03067	1.05608	1.0362	1.02764	1.02937	1.00215	0.977921	0.938444	0.938391	0.937881	0.912543	0.926633	0.920199	0.897189	0.866929	0.857242	0.844466	0.817908	0.836878	0.794367	0.816004	0.851739	0.882086	0.832055	0.844524	0.859754	0.834271	0.842922	0.860542	0.840976	0.886762	0.839215	0.796769	0.781636	0.794792	0.792725	0.781673	0.818188	0.773602	0.764639	0.759372
chr6:Wnk1		1.04551	1.04551	1.04551	1.04551	1.04551	1.04551	1.14079	1.12923	1.13254	1.16649	1.23249	1.23569	1.18312	1.16863	1.25825	1.20086	1.08063	1.00088	0.863845	0.814951	0.79504	0.629486	0.658341	0.610584	0.492525	0.366107	0.374491	0.305286	0.328491	0.412851	0.411696	0.440238	0.59242	0.533952	0.562914	0.639737	0.688802	0.720888	0.849486	0.855743	0.876032	0.887904	0.882104	0.822272	0.85659	0.958678	0.963282	0.928535
chrX:Gk		1.04539	1.04539	1.04539	1.04539	1.04539	1.04539	1.22144	1.19478	1.22528	1.21309	1.10506	1.12122	1.16153	1.21589	1.33781	1.25687	1.23063	1.04065	0.986815	0.780975	0.650052	0.571666	0.409034	0.286266	0.137407	-0.0919878	-0.228829	-0.280761	-0.357627	-0.376893	-0.163152	-0.0758218	0.0451231	0.168279	0.226479	0.257562	0.466375	0.672551	0.700716	0.847301	0.87471	0.810702	0.911257	0.921181	0.831311	0.867369	0.849913	0.68474
chr3:Lrba		1.04416	1.04416	1.04416	1.04416	1.04416	1.04416	0.950616	0.879654	0.744267	0.926273	0.939681	1.08127	1.06609	0.938055	0.683976	0.531599	0.138255	0.01263	-0.0215697	-0.148702	-0.591801	-0.831826	-1.10196	-1.29052	-1.46536	-1.40391	-1.49609	-1.28528	-1.14603	-1.19969	-1.01769	-0.878501	-0.677182	-0.449774	-0.210762	-0.0771478	0.0328302	0.131252	0.0761935	0.223953	0.377391	0.519469	0.661452	0.790449	0.949129	0.783934	0.839293	0.817364
chr3:S1pr1		1.04369	1.04369	1.04369	1.04369	1.04369	1.04369	1.05507	0.993361	1.07584	1.07634	1.01786	0.994128	1.00528	1.07736	1.05846	1.09145	1.08712	1.11499	1.15665	1.07769	0.982897	1.00077	1.00625	0.922809	0.830718	0.755047	0.6683	0.629101	0.570799	0.54685	0.535443	0.572852	0.595153	0.544014	0.586762	0.654915	0.716915	0.787027	0.793903	0.789567	0.776087	0.767926	0.762982	0.750646	0.812865	0.793118	0.785173	0.804266
chr18:Myo5b		1.0436	1.0436	1.0436	1.0436	1.0436	1.0436	1.01422	1.0464	0.992267	0.975577	1.00819	0.98538	0.985111	0.906939	1.01242	1.00418	0.993081	0.960508	0.952733	0.947717	0.984561	0.929772	0.897278	0.900852	0.842754	0.797181	0.816034	0.817945	0.863533	0.782687	0.816331	0.796194	0.757669	0.773044	0.821021	0.877247	0.840924	0.899949	0.875931	0.861954	0.920116	0.851687	0.864594	0.869313	0.919563	0.885254	0.884488	0.925883
chr9:Cacna2d2		1.04347	1.04347	1.04347	1.04347	1.04347	1.04347	1.03754	1.01023	1.02764	1.06984	1.05542	1.11321	1.11518	1.1159	1.08191	1.09219	1.05815	1.02184	1.06147	1.06595	1.03529	1.04244	0.986366	0.966439	0.912684	0.894522	0.8683	0.880867	0.909222	0.856273	0.85134	0.837735	0.816284	0.809056	0.791972	0.820504	0.865946	0.889666	0.878652	0.872961	0.848792	0.817897	0.828144	0.857167	0.847152	0.82511	0.832385	0.816775
chr1:Acsl3		1.04279	1.04279	1.04279	1.04279	1.04279	1.04279	1.04866	1.06393	1.0799	1.09119	1.099	1.11885	1.10076	1.0942	1.09474	1.10918	1.12619	1.10789	1.10107	1.06888	1.01944	0.967369	0.925957	0.900004	0.868591	0.824592	0.801257	0.765941	0.766761	0.745258	0.754491	0.800407	0.838951	0.839121	0.857883	0.868372	0.879429	0.871527	0.887362	0.868073	0.84005	0.815081	0.762959	0.730652	0.733419	0.724085	0.72196	0.740589
chr4:Pdpn		1.04217	1.04217	1.04217	1.04217	1.04217	1.04217	1.05739	1.0543	1.02646	1.01751	1.0209	1.02152	1.01498	1.04651	0.980067	1.02395	1.02043	0.988491	0.956358	0.967852	0.957884	0.96456	0.908188	0.870146	0.822205	0.857793	0.803915	0.786546	0.813714	0.784891	0.797586	0.802489	0.771847	0.805132	0.839649	0.83375	0.838283	0.861573	0.852789	0.807503	0.781672	0.760558	0.764733	0.769299	0.76069	0.732401	0.751975	0.730128
chr15:Ddx17		1.04194	1.04194	1.04194	1.04194	1.04194	1.04194	1.03114	1.28602	1.29891	1.5	1.5	1.5	1.5	1.5	1.48612	1.11795	0.911815	0.478712	0.110226	0.0355576	-0.557387	-0.862207	-1.20947	-1.49584	-1.42177	-1.5	-1.5	-1.5	-1.17198	-1.11988	-1.09211	-0.822581	-0.728348	-0.553396	-0.388854	-0.379405	-0.437823	-0.223093	-0.483097	-0.244039	-0.0818122	0.694602	0.574412	0.542083	0.74737	0.830003	0.792359	0.854278
chr18:Fam69c		1.04187	1.04187	1.04187	1.04187	1.04187	1.04187	1.12959	1.12869	1.06901	1.12482	1.14853	1.17018	1.19919	1.21268	1.21078	1.21878	1.18149	1.12072	1.11501	1.17403	1.12424	1.07728	1.09727	1.043	1.00456	0.978692	0.984729	0.95414	0.957512	0.940254	0.864421	0.832669	0.795218	0.746576	0.731965	0.692407	0.661593	0.629936	0.656184	0.548244	0.481051	0.459405	0.556027	0.615287	0.58052	0.606842	0.634651	0.639589
chr17:Tmem181a		1.04143	1.04143	1.04143	1.04143	1.04143	1.04143	0.991349	1.09136	1.08262	1.10174	1.07767	1.1239	1.14409	1.17102	1.12533	1.17486	1.15195	1.16855	1.11508	1.05595	1.18495	1.16448	1.13313	1.10142	1.06888	1.08091	1.07562	1.07827	1.08469	1.01247	0.998922	0.847261	0.816527	0.855408	0.899907	0.884748	0.788711	0.752537	0.698869	0.665011	0.677709	0.723676	0.783135	0.739237	0.674675	0.662319	0.662043	0.625678
chr13:Ptch1		1.04104	1.04104	1.04104	1.04104	1.04104	1.04104	1.07636	1.08472	1.10232	1.10054	1.06122	1.06409	1.03843	1.02081	1.00569	0.992731	1.0206	0.973097	0.943421	0.945821	0.907849	0.912395	0.884885	0.888717	0.882057	0.885742	0.872009	0.872594	0.851902	0.847524	0.806057	0.780301	0.837684	0.876974	0.888248	0.876986	0.858483	0.825198	0.774478	0.785961	0.766171	0.784337	0.811652	0.768132	0.767474	0.751311	0.768998	0.800058
chr8:Pdgfrl		1.04055	1.04055	1.04055	1.04055	1.04055	1.04055	1.19616	1.31031	1.26207	1.12927	1.09438	1.11528	0.903273	1.10826	0.922926	0.77963	1.0127	0.97587	0.824244	0.829441	1.02433	0.900853	0.972876	1.12827	0.874464	0.939451	1.18814	1.11804	1.08602	1.04326	0.950058	0.814724	0.868869	0.899919	0.842453	0.988034	0.855984	0.990957	0.928564	0.815263	0.781553	0.750001	0.689454	0.661305	0.590624	0.50682	0.317055	0.36683
chr4:Sh3gl2		1.04051	1.04051	1.04051	1.04051	1.04051	1.04051	1.05558	1.08497	1.07888	1.04693	1.05245	1.01121	1.03928	0.991353	1.01104	1.06526	1.03171	0.998482	0.939706	0.928659	0.913423	0.858985	0.808862	0.831132	0.838984	0.778898	0.734591	0.745191	0.728892	0.721763	0.718951	0.734249	0.767158	0.82627	0.783211	0.771277	0.785201	0.796242	0.785915	0.780243	0.811205	0.806128	0.804274	0.771016	0.756861	0.782471	0.806749	0.860411
chr3:Vav3		1.0375	1.0375	1.0375	1.0375	1.0375	1.0375	1.03093	1.06997	1.09092	1.1444	1.19747	1.12226	1.18344	1.21357	1.22751	1.17392	1.17202	1.09201	0.957407	0.825316	0.735074	0.617764	0.575592	0.4837	0.359039	0.359797	0.336033	0.248877	0.238597	0.393727	0.495695	0.517787	0.561706	0.738754	0.809391	0.938685	1.0099	1.09112	1.18928	1.29768	1.23479	1.21562	1.29117	1.26692	1.13	1.03263	0.952455	0.817849
chr5:Lrrc66		1.03698	1.03698	1.03698	1.03698	1.03698	1.03698	1.12898	1.08554	1.05507	1.08861	1.15369	1.14026	1.14238	1.14122	1.18346	1.25502	1.21714	1.15093	1.12628	1.09799	0.985037	0.840585	0.833099	0.814689	0.797011	0.693522	0.630341	0.59303	0.574165	0.623921	0.638173	0.67544	0.711681	0.728824	0.776287	0.847184	0.956313	0.947444	0.968905	1.02376	1.02857	1.04951	1.00879	0.992253	0.944082	0.905679	0.835234	0.78097
chr17:Efna5		1.03529	1.03529	1.03529	1.03529	1.03529	1.03529	1.00182	1.0013	0.874469	0.936023	0.886111	0.843786	0.880852	0.796537	0.811764	0.789661	0.694744	0.613642	0.55644	0.60444	0.474734	0.343167	0.29836	0.2308	0.271475	0.143532	0.0987152	0.195404	0.305861	0.385937	0.472469	0.593414	0.652937	0.710651	0.695386	0.635769	0.797702	0.868101	0.859449	0.819531	0.773774	0.688496	0.619211	0.793033	0.894966	0.935954	1.00763	1.01416
chr6:Etnk1		1.03361	1.03361	1.03361	1.03361	1.03361	1.03361	0.866859	0.902064	0.998206	1.01175	0.9838	0.941941	0.882922	0.960439	0.93408	0.807935	0.849769	0.938411	0.83298	0.810357	0.743823	0.776069	0.709818	0.574055	0.477522	0.513334	0.55928	0.434928	0.475007	0.471208	0.496438	0.437437	0.425272	0.495079	0.649708	0.608087	0.494148	0.612672	0.65774	0.656673	0.778261	0.83624	0.898513	0.869761	0.949044	0.935212	1.02674	1.07281
chrX:Pgrmc1		1.03344	1.03344	1.03344	1.03344	1.03344	1.03344	1.08087	0.97184	0.967733	1.09499	1.15408	1.1589	1.14719	1.17062	1.0726	1.13631	1.15461	1.12561	1.18852	1.21924	1.04625	1.05119	0.859484	0.987956	0.938329	0.900815	0.890321	0.911872	0.930617	0.921405	0.922088	1.07978	1.00975	1.14784	1.11632	1.01011	0.957212	0.97808	0.731074	0.566772	0.432171	0.418811	0.161169	0.149418	0.159319	0.176861	0.262418	0.398823
chr10:Lrp1		1.03125	1.03125	1.03125	1.03125	1.03125	1.03125	0.981159	0.941885	0.966658	0.96889	0.951077	0.949506	0.933509	0.851266	0.849849	0.897644	0.873116	0.900848	0.980337	0.935162	0.917302	0.920793	0.927521	0.926539	0.970947	0.894577	0.81746	0.867262	0.896629	0.827516	0.848071	0.842748	0.854486	0.825931	0.787434	0.827239	0.857595	0.921291	0.881794	0.881265	0.930634	0.926299	0.880456	0.857547	0.827098	0.820733	0.728747	0.764968
chr3:Magi3		1.03066	1.03066	1.03066	1.03066	1.03066	1.03066	1.05786	1.08767	1.04426	1.06331	1.07689	1.11079	1.11746	1.08287	1.12143	1.1033	1.05905	0.985298	0.918964	0.850161	0.803303	0.720819	0.624124	0.608018	0.601256	0.51643	0.571976	0.561635	0.572956	0.563495	0.592801	0.573807	0.628939	0.673513	0.726212	0.709527	0.754389	0.737155	0.715625	0.775633	0.810115	0.794951	0.840605	0.840795	0.878522	0.831284	0.848633	0.83277
chr7:Far1		1.02952	1.02952	1.02952	1.02952	1.02952	1.02952	0.976627	0.974569	0.995681	0.980294	1.01885	1.02186	1.02387	1.01611	1.11895	1.0725	1.0158	1.01743	0.996091	0.986517	0.997629	0.97701	1.00501	1.00996	1.03512	0.918296	0.932989	0.934469	0.889423	0.848744	0.783455	0.778259	0.781315	0.716757	0.705638	0.651701	0.756923	0.732113	0.852945	0.922623	0.939685	0.934066	0.923461	0.883515	0.890993	0.886945	0.9349	0.894457
chr11:Mbtd1		1.02926	1.02926	1.02926	1.02926	1.02926	1.02926	0.958416	0.98047	0.794965	0.61272	0.501402	0.644418	0.835845	0.922133	0.980939	0.765586	0.822076	0.546055	0.298122	0.232005	0.277438	0.122809	-0.280927	-0.392928	-0.686992	-0.849184	-0.736887	-1.00048	-0.673484	-0.632061	-0.535792	-0.707276	-0.728403	-0.360731	-0.400166	-0.307716	-0.264285	-0.26803	-0.187172	-0.180457	-0.026788	0.19245	0.421182	0.34002	0.389353	0.411582	0.261721	0.101531
chr4:Raver2		1.02924	1.02924	1.02924	1.02924	1.02924	1.02924	1.06254	0.98062	0.898611	0.887654	0.880996	0.853486	0.893545	0.857033	0.808892	0.83552	0.836509	0.897212	1.00328	1.02499	1.11524	1.12745	1.17195	1.17637	1.15702	1.19405	1.20684	1.1685	1.06071	0.940866	0.89158	0.816914	0.796539	0.760829	0.675549	0.714364	0.702572	0.629603	0.625962	0.637277	0.692192	0.660309	0.624632	0.543038	0.549499	0.592738	0.47771	0.416562
chr5:Rimbp2		1.02747	1.02747	1.02747	1.02747	1.02747	1.02747	1.03847	1.01596	1.10729	1.0509	1.13524	1.12725	1.16493	1.09151	1.11514	1.1269	1.15808	1.11758	1.06158	0.984373	1.00832	0.925423	0.99944	0.98273	1.00499	1.03824	1.00523	1.00671	0.957889	0.985652	0.905724	0.882449	0.922117	0.882265	0.84136	0.77984	0.727256	0.776548	0.749416	0.779779	0.772807	0.835453	0.898131	0.869081	0.815036	0.828005	0.885391	0.820234
chr4:Casz1		1.02734	1.02734	1.02734	1.02734	1.02734	1.02734	0.994158	0.788027	0.51995	0.781479	0.837091	1.10715	0.997057	0.947206	0.841113	0.758353	0.736083	0.619439	0.586825	0.5017	0.276381	0.0444257	-0.234244	-0.241854	-0.268232	-0.426546	-0.618856	-0.725712	-0.650409	-0.559549	-0.494066	-0.508055	-0.334917	-0.126709	0.0783834	0.0905155	0.334793	0.525523	0.779591	0.887527	1.06812	1.40383	1.45595	1.4516	1.5	1.38427	1.3459	1.22421
chrX:Arhgap6		1.02715	1.02715	1.02715	1.02715	1.02715	1.02715	1.10911	1.15342	1.20439	1.21051	1.16251	1.12724	1.09881	1.10464	1.13457	1.16966	1.19106	1.10424	1.07598	1.03285	0.936133	0.969625	0.9645	0.953382	0.874805	0.824626	0.762682	0.752317	0.728998	0.692149	0.625803	0.682495	0.637381	0.635159	0.582664	0.581586	0.561946	0.54578	0.514737	0.544694	0.587794	0.634676	0.590076	0.603043	0.63908	0.651496	0.669462	0.737876
chr4:Rap1gap		1.02666	1.02666	1.02666	1.02666	1.02666	1.02666	0.838736	0.8485	0.754372	0.723163	0.882717	0.840239	0.735764	0.785529	0.734529	0.75952	0.714534	0.739688	0.655108	0.647413	0.6719	0.463384	0.486456	0.432886	0.432947	0.37693	0.436284	0.463971	0.473203	0.636225	0.637255	0.56246	0.605072	0.615145	0.766179	0.689073	0.818518	0.863701	0.789572	0.909707	0.822426	0.912132	1.13248	1.18042	1.13218	1.14171	1.09574	1.07248
chr4:Asph		1.02553	1.02553	1.02553	1.02553	1.02553	1.02553	1.05001	1.04933	0.998798	1.06262	1.0627	1.09106	1.11759	1.0505	1.0498	1.09296	1.0784	1.06388	1.02859	1.04362	0.964681	0.919718	0.865144	0.851377	0.852355	0.859629	0.869338	0.823683	0.81466	0.84327	0.847096	0.894011	0.919141	0.900281	0.817786	0.819819	0.782142	0.767921	0.810587	0.833726	0.817396	0.839817	0.824392	0.82824	0.873499	0.917669	0.897407	0.93635
chr12:Ralgapa1		1.02481	1.02481	1.02481	1.02481	1.02481	1.02481	1.03783	1.05001	1.15981	1.25441	1.22876	1.29936	1.24823	1.24173	1.01221	0.947481	0.777951	0.614391	0.472879	0.244722	-0.00352278	-0.125682	-0.212063	-0.163293	-0.179148	-0.337387	-0.435488	-0.520573	-0.431797	-0.428601	-0.38884	-0.181278	-0.077675	0.15138	0.112108	0.0522843	0.195385	0.196135	0.337005	0.313323	0.474499	0.515458	0.446528	0.512049	0.308144	0.374943	0.361143	0.287114
chr3:Slc16a1		1.0239	1.0239	1.0239	1.0239	1.0239	1.0239	1.02565	1.01823	1.02544	1.04221	1.05007	1.06662	1.08629	1.06869	1.0901	1.13309	1.11906	1.10887	1.08859	1.09135	1.07983	1.0998	1.04672	1.00914	1.01026	0.962708	0.922719	0.903385	0.879666	0.908112	0.874061	0.849369	0.801563	0.795717	0.795833	0.791854	0.820142	0.816887	0.807666	0.833515	0.776495	0.786254	0.77812	0.766555	0.777865	0.763124	0.785393	0.766943
chr11:Cdk12		1.02374	1.02374	1.02374	1.02374	1.02374	1.02374	1.20293	1.24144	1.26723	1.12971	1.26116	1.07495	0.858729	0.9934	1.1728	1.16952	0.817729	0.651536	0.218346	0.103224	-0.0193534	-0.291098	-0.483457	-0.683297	-0.823084	-1.09446	-1.3839	-1.43269	-1.32138	-1.08746	-0.939946	-0.975889	-1.06147	-0.891204	-0.583913	-0.553946	-0.616289	-0.420224	-0.274193	-0.166829	-0.24088	-0.362734	-0.275661	-0.130829	-0.220324	-0.433715	-0.789092	-0.672547
chr18:Colec12		1.02232	1.02232	1.02232	1.02232	1.02232	1.02232	0.952911	0.932158	0.828866	0.781849	0.754415	0.708243	0.749345	0.769083	0.731558	0.809336	0.871871	0.887426	0.884306	0.964979	1.11454	1.2637	1.29791	1.29853	1.3488	1.36969	1.27486	1.22523	1.23962	1.18061	1.11727	1.07089	0.963509	0.851901	0.89718	0.877145	0.855389	0.875568	0.862205	0.804276	0.770792	0.71066	0.665101	0.756284	0.781433	0.657438	0.525588	0.528467
chr7:Gm5900		1.02149	1.02149	1.02149	1.02149	1.02149	1.02149	1.01876	1.00901	0.955536	0.995719	0.949002	0.92149	0.872928	0.841079	0.796663	0.804916	0.888584	0.918879	0.974024	0.971932	0.97149	1.014	0.977541	1.01726	1.10463	1.15248	1.21933	1.15004	1.12362	1.07933	1.06021	1.05678	1.01538	1.0068	1.02234	0.979609	0.974561	0.912102	0.909829	0.890636	0.88998	0.843196	0.778965	0.750295	0.75315	0.709552	0.746969	0.690005
chr18:Nr3c1		1.02052	1.02052	1.02052	1.02052	1.02052	1.02052	1.07074	1.0195	1.03866	1.11373	1.06124	1.06445	1.12374	1.08036	1.13428	1.13155	1.23686	1.14373	1.1668	1.12462	1.03185	1.05263	0.971553	0.777161	0.765478	0.720749	0.613883	0.495237	0.46445	0.458729	0.43123	0.401903	0.357275	0.398265	0.560556	0.608731	0.586868	0.571171	0.737545	0.677826	0.599698	0.573038	0.589721	0.583584	0.594794	0.483971	0.522179	0.549197
chr11:Cacng4		1.02017	1.02017	1.02017	1.02017	1.02017	1.02017	0.981664	1.00645	0.985746	0.963521	0.979322	0.949315	0.934962	0.89335	0.881115	0.89438	0.951789	0.992619	0.986834	0.971052	0.988986	0.967382	1.02015	1.02447	1.0526	1.05726	1.08985	1.05423	1.0321	0.998584	1.01525	0.960974	0.941342	0.894052	0.869829	0.858078	0.849394	0.791843	0.765502	0.782376	0.77436	0.743095	0.73424	0.761989	0.765456	0.757139	0.716859	0.701757
chr8:Nwd1		1.01966	1.01966	1.01966	1.01966	1.01966	1.01966	1.08886	1.00621	1.14708	1.14134	1.12988	1.13251	1.11358	1.19517	1.10667	1.04502	0.951527	0.792219	0.68452	0.535865	0.425328	0.31051	0.177833	0.0499449	-0.0877644	-0.069002	-0.0688729	-0.00133413	0.0630839	0.1965	0.195635	0.39266	0.51174	0.782393	0.955678	0.998764	1.0092	1.14637	1.16009	1.20183	1.21088	1.34138	1.32429	1.37331	1.23526	1.25141	1.31377	1.34725
chr10:Fam184a		1.01951	1.01951	1.01951	1.01951	1.01951	1.01951	1.2296	1.33836	1.4013	1.5	1.5	1.5	1.5	1.47588	1.48596	1.40636	1.25988	1.14058	0.87372	0.88496	0.900272	0.705435	0.749505	0.575665	0.497679	0.337592	0.285594	0.209021	0.131536	0.182646	0.162495	0.0688865	0.185222	0.125886	0.212584	0.236251	0.298963	0.522732	0.655469	0.956054	1.062	1.00497	1.13285	1.14981	1.00605	1.03518	1.00486	1.0106
chr11:Tnrc6c		1.01894	1.01894	1.01894	1.01894	1.01894	1.01894	1.17845	1.1962	1.39221	1.5	1.31665	1.46746	1.35312	1.19879	1.38078	1.17083	1.17503	0.937381	0.695146	0.338254	0.0111066	-0.0932607	-0.282213	-0.440077	-0.388167	-0.570405	-0.594448	-0.660612	-0.734268	-0.764054	-0.809538	-0.633753	-0.346462	-0.243512	0.0569498	0.0633368	0.00382204	0.169082	0.356085	0.456692	0.455797	0.770537	0.736205	0.610198	0.556975	0.298333	0.325215	0.418133
chr3:Plch1		1.01778	1.01778	1.01778	1.01778	1.01778	1.01778	0.996867	1.01667	1.01423	1.03958	1.05209	1.06968	1.09638	1.05265	1.04148	1.02442	0.952632	0.936378	0.8876	0.777933	0.700459	0.579928	0.545844	0.42739	0.395196	0.368489	0.337568	0.340845	0.342555	0.378538	0.51465	0.570999	0.673409	0.700422	0.793065	0.831833	0.882322	0.97836	1.03608	1.08569	1.07205	1.05571	1.111	1.09637	1.12671	1.09637	1.08528	1.08996
chr11:Egfr		1.01566	1.01566	1.01566	1.01566	1.01566	1.01566	1.10568	1.17826	1.14618	1.19082	1.21713	1.27967	1.37047	1.36114	1.40049	1.29187	1.23922	1.08526	0.913666	0.795637	0.631507	0.527594	0.330761	0.267248	0.160086	0.079574	0.129761	0.105764	0.19684	0.22066	0.387623	0.504425	0.606954	0.738749	0.766486	0.895698	0.928938	0.937341	0.983427	0.988271	1.03462	1.01169	0.973333	0.989326	0.936925	0.999365	0.903878	0.868159
chr5:Mmd2		1.01531	1.01531	1.01531	1.01531	1.01531	1.01531	1.03594	0.961538	0.879234	0.82989	0.794283	0.767791	0.768082	0.802447	0.777831	0.865133	0.820961	0.808432	0.816388	0.800064	0.760197	0.796051	0.813108	0.898339	0.828077	0.854108	0.833931	0.832954	0.809418	0.782317	0.761209	0.870922	0.935559	0.892488	0.897432	0.918902	0.945256	0.918207	0.925919	0.910963	0.92325	0.967399	0.90033	0.830604	0.90453	0.908309	0.958075	0.930517
chr19:Ctsf		1.01486	1.01486	1.01486	1.01486	1.01486	1.01486	1.00044	0.998913	0.867907	0.812552	0.932917	0.993513	1.05967	0.948662	0.842966	0.771414	0.821104	0.717372	0.697021	0.752175	0.695333	0.826506	0.988599	1.06618	1.14832	1.32559	1.5	1.5	1.5	1.5	1.4869	1.5	1.33027	1.22567	1.14876	0.988557	0.934009	0.77854	0.659677	0.572058	0.570731	0.545615	0.624662	0.575182	0.52217	0.37453	0.29081	0.211435
chr10:Cd63		1.01428	1.01428	1.01428	1.01428	1.01428	1.01428	1.10013	0.962082	0.824086	0.723198	0.602465	0.734799	0.847863	1.06933	1.01786	1.0274	0.948089	0.890756	1.05526	1.16239	1.23569	1.39289	1.34842	1.16134	1.16062	1.16726	1.1177	1.22616	1.09028	1.12582	1.18407	1.16491	1.06034	1.04173	1.17046	0.964619	0.916656	0.902349	0.867844	0.850483	0.696468	0.567856	0.464673	0.465946	0.249496	0.148869	0.0423763	-0.0395714
chr1:Rasal2		1.01375	1.01375	1.01375	1.01375	1.01375	1.01375	1.05622	1.00385	1.25594	1.33012	1.46183	1.32626	1.5	1.31164	1.38791	1.33738	1.20218	1.20186	1.14273	0.955746	0.781392	0.503609	0.562432	0.351991	0.342121	0.293573	0.331165	0.535684	0.402555	0.399365	0.303359	0.384154	0.400205	0.172334	0.247866	0.210681	0.142864	0.0969041	0.100679	0.145751	0.101545	0.094603	-0.0239174	0.0112467	0.172816	0.156933	0.30017	0.220132
chr4:Kdm4c		1.01281	1.01281	1.01281	1.01281	1.01281	1.01281	1.04406	0.965251	1.00459	0.983623	0.913069	0.86682	0.953448	0.712736	0.541355	0.471993	0.436607	0.325142	0.0915667	0.0948614	-0.233354	-0.391708	-0.468796	-0.792203	-0.757276	-0.954208	-0.858691	-0.898028	-1.14539	-0.930136	-1.10856	-0.88928	-0.836797	-0.940486	-0.811737	-0.727458	-0.610408	-0.602274	-0.674773	-0.409601	-0.325848	-0.215343	-0.319196	-0.215673	-0.139721	-0.0337106	-0.0866704	-0.138299
chr14:Dad1		1.01276	1.01276	1.01276	1.01276	1.01276	1.01276	1.01443	0.961603	0.965692	0.873778	0.787024	0.758251	0.713458	0.670559	0.565243	0.523585	0.580764	0.676196	0.77943	0.795721	1.09634	1.25815	1.49993	1.5	1.5	1.5	1.5	1.5	1.5	1.5	1.5	1.32885	1.16827	0.910898	0.711819	0.694124	0.641834	0.580058	0.425759	0.36822	0.424341	0.378953	0.327509	0.228958	0.263229	0.226029	0.0790285	-0.0227783
chr9:Clasp2		1.01267	1.01267	1.01267	1.01267	1.01267	1.01267	0.959136	0.902241	1.07092	0.991566	1.10509	1.13442	1.29931	1.1748	1.24059	1.33385	1.1243	1.09868	1.15049	0.923186	0.894733	0.669554	0.333369	0.124291	0.131243	-0.0606162	-0.341728	-0.306662	-0.239706	-0.23533	-0.344552	-0.394339	-0.320387	-0.147177	-0.19621	-0.325473	-0.272827	-0.159782	-0.080696	-0.0475498	-0.166282	-0.0974268	-0.183268	-0.349129	-0.114204	-0.151074	-0.276559	-0.297752
chr11:Srsf1		1.01254	1.01254	1.01254	1.01254	1.01254	1.01254	1.12209	0.911821	0.937665	0.943845	0.780342	0.925338	0.93235	1.18124	1.05413	1.04118	0.894846	0.639205	0.715016	0.7261	0.54888	0.638233	0.494259	0.518743	0.345903	0.312657	0.0593642	0.191409	0.137232	0.153914	0.169436	0.352146	0.519762	0.530957	0.586686	0.603797	0.764053	1.03279	0.879803	0.815507	0.698558	0.708249	0.700557	0.638017	0.633526	0.537049	0.493851	0.569321
chr5:Slc8b1		1.01199	1.01199	1.01199	1.01199	1.01199	1.01199	0.926027	0.994664	0.940431	0.934162	0.853515	0.931005	0.839086	0.817731	0.819952	0.906633	0.988453	0.984195	0.909064	0.950972	0.964953	1.06392	1.09699	1.13361	1.20068	1.13497	1.13631	1.15506	1.18447	1.24107	1.16262	1.04778	0.975465	0.851499	0.862394	0.828155	0.857753	0.727088	0.588249	0.543623	0.524008	0.566237	0.494608	0.526439	0.574037	0.634383	0.628402	0.601644
chr8:Adgra2		1.01092	1.01092	1.01092	1.01092	1.01092	1.01092	1.07268	1.03156	0.834046	0.782388	0.71191	0.583602	0.536883	0.51802	0.466674	0.409405	0.449753	0.434099	0.375622	0.439343	0.547671	0.682845	0.738041	0.809113	1.00698	0.999031	1.04125	0.971086	0.9385	1.05033	1.04866	1.09213	0.960557	0.945666	0.940763	0.656212	0.680192	0.606002	0.589884	0.643527	0.563057	0.557041	0.486591	0.601783	0.646879	0.561966	0.575839	0.58979
chr14:Ptprg		1.00915	1.00915	1.00915	1.00915	1.00915	1.00915	1.01902	1.02912	1.05769	1.14517	1.11053	1.18664	1.05935	1.14381	1.11232	1.14772	1.15871	1.13972	1.09871	1.05677	1.00177	0.977843	0.95667	1.08215	1.0276	0.98906	0.953784	0.868748	0.78522	0.783914	0.766981	0.677887	0.680456	0.653295	0.537564	0.549185	0.566038	0.55222	0.606658	0.642006	0.682914	0.729387	0.733891	0.770143	0.756103	0.91812	0.872177	0.861725
chr11:Kansl1		1.00878	1.00878	1.00878	1.00878	1.00878	1.00878	0.959897	1.03499	0.95331	1.00592	1.08011	1.24985	1.21902	1.25714	1.2556	1.16271	1.02943	0.911371	0.609915	0.3191	0.170863	-0.0916977	-0.45064	-0.631348	-0.614333	-0.676819	-0.80348	-0.911546	-0.792297	-0.521439	-0.468575	-0.350744	-0.242131	-0.0936533	0.0805998	-0.044481	0.0623037	0.241568	0.374884	0.422422	0.153631	0.316443	0.408066	0.479702	0.516795	0.481062	0.598105	0.344335
chr6:Dusp11		1.00826	1.00826	1.00826	1.00826	1.00826	1.00826	1.09421	1.07071	1.21365	1.10846	1.23346	1.33315	1.32934	1.35749	1.35106	1.21377	1.12509	1.01446	1.04597	0.914568	0.908919	0.719654	0.589493	0.419255	0.469593	0.393182	0.456317	0.406187	0.436384	0.258579	0.220699	0.408715	0.545069	0.538561	0.660049	0.685683	0.665817	0.807047	0.944613	0.966734	1.18196	1.25071	1.13699	1.09329	1.16838	1.22866	1.14067	1.13693
chr5:Sema3e		1.00676	1.00676	1.00676	1.00676	1.00676	1.00676	1.03671	1.04249	1.17507	1.24345	1.15628	1.07795	1.1424	1.15825	1.18211	1.14111	1.06047	0.959121	0.896742	0.736236	0.538696	0.475986	0.399744	0.296234	0.296526	0.225254	0.148962	0.254159	0.338473	0.308451	0.474966	0.627667	0.729274	0.834974	0.836641	0.863828	0.88845	0.979031	0.913385	0.909394	0.986408	0.883282	0.85987	0.866116	0.817348	0.840313	0.831032	0.819288
chr12:Pygl		1.00417	1.00417	1.00417	1.00417	1.00417	1.00417	1.05412	1.06959	1.00095	1.02341	1.07103	1.17981	1.24995	1.39481	1.43137	1.36026	1.26268	1.27397	1.29383	1.33373	1.28298	1.25485	1.17879	1.15355	0.984554	0.886139	1.02131	1.07161	0.999414	0.914975	0.781471	0.863603	0.749654	0.715006	0.6189	0.541609	0.590245	0.516705	0.402026	0.443666	0.526035	0.597292	0.527517	0.5038	0.528867	0.612694	0.789449	0.739905
chr16:Atp5o		1.0036	1.0036	1.0036	1.0036	1.0036	1.0036	1.00482	1.01517	0.730995	0.601116	0.689948	0.909406	1.04019	0.818688	1.0196	0.786559	0.62126	0.715925	0.64139	0.842543	1.01383	1.03895	1.07149	0.986428	1.03175	0.755347	0.771855	0.923351	0.81299	0.71679	0.760191	0.749711	0.826507	0.665695	0.594695	0.756897	0.905115	1.09305	0.828617	1.04258	1.30102	1.23956	1.1837	1.06762	1.12799	1.2153	1.00255	0.847883
chr11:Pmp22		1.00324	1.00324	1.00324	1.00324	1.00324	1.00324	0.91207	1.14236	1.11424	1.17931	1.17958	1.13108	1.0911	1.00023	0.853708	0.937868	0.916041	0.930024	0.901119	0.883624	0.849928	0.814662	0.844136	0.834389	0.839398	0.92139	0.895081	0.89738	0.870329	0.851637	0.823436	0.811232	0.804789	0.813423	0.721087	0.751173	0.679527	0.627075	0.590426	0.518926	0.418507	0.504947	0.536121	0.535093	0.394533	0.367481	0.25126	0.246542
chr1:Phlpp1		1.00012	1.00012	1.00012	1.00012	1.00012	1.00012	1.03801	1.04171	1.05176	1.07225	1.08937	1.09468	1.08816	1.084	1.0875	1.03603	1.02766	0.986496	0.942321	0.866903	0.798632	0.735573	0.642693	0.602855	0.566925	0.501121	0.473738	0.49462	0.532753	0.527316	0.621905	0.681848	0.752945	0.830803	0.832812	0.889727	0.950125	0.983143	1.00551	1.00977	1.05347	1.01373	1.06131	1.06783	1.07668	1.12372	1.0724	1.0543
chrX:Slitrk2		0.997936	0.997936	0.997936	0.997936	0.997936	0.997936	0.986384	0.996421	0.987523	0.992207	0.997267	0.969297	0.972985	0.958709	0.949001	0.981477	0.997958	0.996502	1.02506	0.996471	0.975844	0.984285	1.00008	1.00392	0.979817	0.969863	0.982459	0.940856	0.960069	0.924692	0.927709	0.94297	0.940715	0.948377	0.918242	0.894695	0.887799	0.861584	0.867129	0.817704	0.786805	0.790189	0.738095	0.718633	0.698584	0.736419	0.732261	0.761494
chr3:Rapgef2		0.99595	0.99595	0.99595	0.99595	0.99595	0.99595	1.01381	1.08093	1.07161	1.23659	1.11108	1.24333	1.10942	1.02046	1.03063	0.961902	1.01937	0.960609	0.876345	0.793326	0.634416	0.620046	0.463057	0.575301	0.588063	0.595507	0.522591	0.514756	0.641979	0.603993	0.697518	0.773432	0.788922	0.769516	0.742667	0.835678	0.992908	0.897783	0.964385	0.849894	0.832143	0.748567	0.774732	0.844151	0.807848	0.853833	0.817616	0.578786
chrX:Gm15261		0.994867	0.994867	0.994867	0.994867	0.994867	0.994867	0.959255	0.980568	1.01521	0.995348	0.954473	1.05505	1.06105	1.15143	1.18292	1.17071	1.10559	1.01291	0.996726	0.980831	0.882474	0.82124	0.761759	0.757011	0.668041	0.593241	0.65601	0.707383	0.741821	0.79593	0.869571	0.992084	0.974579	0.997071	0.97087	0.956498	0.984669	0.877337	0.917372	0.97753	0.994678	0.875768	0.767023	0.796347	0.878373	0.965703	0.921981	0.865658
chr16:Emp2		0.994452	0.994452	0.994452	0.994452	0.994452	0.994452	0.942791	0.885282	0.965867	1.01356	1.01449	1.02977	0.934965	0.97755	0.888991	0.945235	0.980694	0.999072	1.10305	1.07021	1.05488	1.10251	1.14071	1.19958	1.07442	1.16564	1.08797	1.00855	1.10754	1.02322	0.95012	0.903519	0.868047	0.814535	0.733486	0.763689	0.711747	0.749529	0.763701	0.657485	0.677529	0.721466	0.685324	0.618231	0.581111	0.596422	0.67015	0.605909
chr4:Adgrb2		0.993376	0.993376	0.993376	0.993376	0.993376	0.993376	0.938474	0.840236	0.791023	0.786728	0.772575	0.823997	0.748168	0.753396	0.705612	0.722937	0.802173	0.912522	0.974611	1.05781	1.12427	1.16967	1.13583	1.26549	1.21946	1.18663	1.1527	1.15557	1.03026	0.980093	0.915006	0.854896	0.802506	0.783222	0.713218	0.770711	0.811754	0.753397	0.74423	0.761165	0.909339	0.920709	0.94698	0.949779	1.00427	0.965861	0.95993	0.953836
chr16:Shisa9		0.992774	0.992774	0.992774	0.992774	0.992774	0.992774	1.00014	1.01784	1.06874	1.08707	1.085	1.09846	1.09392	1.10966	1.10981	1.08383	1.05687	1.00494	0.952145	0.89307	0.838903	0.783496	0.748833	0.716275	0.645211	0.580538	0.561873	0.559974	0.603297	0.628628	0.648521	0.6769	0.73767	0.773085	0.798784	0.868127	0.921277	0.970344	0.978527	0.976245	1.00738	1.04728	1.07631	1.08489	1.07196	1.0931	1.07072	1.04897
chr1:Tmem131		0.992016	0.992016	0.992016	0.992016	0.992016	0.992016	0.961256	0.903926	1.05225	1.17655	1.13183	1.08041	1.04584	1.03499	0.880512	0.839659	0.838444	0.920283	0.790185	0.691566	0.456799	0.375015	0.307404	0.399129	0.476645	0.457665	0.355864	0.444735	0.31752	0.391117	0.404311	0.586387	0.561179	0.706144	0.649972	0.797287	0.95491	1.09927	1.12635	1.4146	1.49178	1.49508	1.5	1.5	1.5	1.5	1.47906	1.36379
chr7:Far1os		0.990694	0.990694	0.990694	0.990694	0.990694	0.990694	0.966408	1.03531	1.08502	1.06449	1.16722	1.0761	1.19119	1.16527	1.20845	1.16203	1.15345	1.1775	1.13177	1.0335	0.991915	0.900127	0.915953	0.849077	0.807312	0.738797	0.728913	0.739526	0.739095	0.744555	0.851501	0.948884	0.943546	0.967662	0.919471	1.04554	1.09681	1.08859	1.05619	1.05472	1.02545	0.980849	0.887777	0.919316	0.911853	0.851993	0.760759	0.707778
chr12:Trim9		0.990538	0.990538	0.990538	0.990538	0.990538	0.990538	1.03935	1.09429	1.14135	1.16001	1.1819	1.13434	1.11287	1.09909	1.09753	1.06608	1.0437	1.02537	0.906886	0.791299	0.736949	0.669614	0.636537	0.591325	0.539572	0.508149	0.521881	0.526366	0.52634	0.590685	0.656275	0.709571	0.776526	0.83018	0.930686	0.965768	0.966507	1.00973	1.03896	1.05294	1.07254	1.11253	1.09778	1.09558	1.11238	1.07096	1.07366	1.12219
chrX:Ocrl		0.990524	0.990524	0.990524	0.990524	0.990524	0.990524	1.09214	1.04653	1.05737	1.16147	1.41676	1.5	1.5	1.5	1.5	1.42194	1.13134	0.95487	0.86254	0.692645	0.543932	0.215754	-0.0405292	-0.295137	-0.450785	-0.638195	-0.601341	-0.591179	-0.525556	-0.434827	-0.318348	-0.105816	0.0494238	0.345391	0.582097	0.803279	1.06253	1.11658	1.3727	1.44978	1.5	1.5	1.5	1.5	1.5	1.5	1.44149	1.26304
chr13:Gli3	Y	0.987806	0.987806	0.987806	0.987806	0.987806	0.987806	0.96417	0.937528	1.08142	1.14242	1.23596	1.22713	1.27011	1.31426	1.30079	1.35339	1.39087	1.33923	1.26817	1.04494	0.96716	0.773466	0.677333	0.498128	0.394387	0.321943	0.31612	0.280083	0.252585	0.287808	0.393683	0.366033	0.446862	0.499538	0.587876	0.548291	0.569336	0.562507	0.630687	0.707104	0.634678	0.629429	0.699653	0.60539	0.679067	0.752259	0.784521	0.831753
chr18:Zfp516		0.987618	0.987618	0.987618	0.987618	0.987618	0.987618	1.02761	1.12535	1.26841	1.31668	1.34705	1.22146	1.37542	1.38336	1.39249	1.17091	1.20356	0.968298	0.925094	0.730396	0.605643	0.606225	0.545858	0.342495	0.226978	0.108967	0.0664469	0.118469	0.200245	0.261317	0.355261	0.414173	0.353165	0.470186	0.533645	0.614269	0.548739	0.709656	0.653461	0.745824	0.678848	0.690606	0.837389	0.900851	0.882444	0.974388	1.05666	1.16105
chr5:Crot		0.987124	0.987124	0.987124	0.987124	0.987124	0.987124	0.993342	1.0186	1.05478	1.05599	1.01794	1.04927	1.02821	1.03986	1.08494	1.05564	1.02796	1.00969	0.995888	0.989169	1.00038	0.992483	0.949917	0.939617	0.906941	0.845441	0.886212	0.850822	0.806174	0.737605	0.716429	0.740488	0.747927	0.759721	0.749219	0.779361	0.813011	0.780749	0.781773	0.815331	0.830206	0.784645	0.705878	0.666996	0.649715	0.688578	0.660338	0.64156
chr1:Cdh20		0.98626	0.98626	0.98626	0.98626	0.98626	0.98626	1.09397	1.22911	1.28135	1.43026	1.5	1.43615	1.46853	1.14848	1.08965	0.983346	0.859312	0.575969	0.234295	-0.0881389	-0.536371	-0.814192	-0.978266	-1.3053	-1.30031	-1.5	-1.5	-1.5	-1.5	-1.5	-1.5	-1.36414	-1.15028	-0.930738	-0.692401	-0.492736	-0.207201	0.124358	0.488546	0.790616	0.861041	1.03544	1.05442	1.06483	0.966992	1.10099	0.912763	0.819327
chr10:Nr1h4		0.986117	0.986117	0.986117	0.986117	0.986117	0.986117	0.921942	0.873738	0.872061	0.842925	0.746756	0.817791	0.898083	0.8751	0.793626	0.72711	0.728297	0.729559	0.74107	0.771881	0.81119	0.895567	0.844321	0.826973	0.881451	0.86692	0.830878	0.801604	0.863068	0.79018	0.902973	0.867075	0.832961	0.769896	0.835935	0.898523	0.961046	0.936773	1.08525	1.06552	1.10511	1.05511	1.01959	0.972318	0.989134	0.840408	0.675197	0.68018
chr12:Ap4s1		0.984709	0.984709	0.984709	0.984709	0.984709	0.984709	0.878213	0.770761	0.722989	0.667305	0.595197	0.550015	0.499771	0.447888	0.385687	0.371569	0.440133	0.513978	0.722682	0.808334	0.870586	0.896042	0.962795	1.11979	1.15348	1.21494	1.20618	1.2371	1.14933	1.07391	0.971661	0.916945	0.878315	0.804262	0.684861	0.64997	0.680921	0.665057	0.589822	0.637965	0.687748	0.714587	0.706076	0.628187	0.675178	0.763442	0.804423	0.806728
chr16:Senp7		0.984549	0.984549	0.984549	0.984549	0.984549	0.984549	1.00194	1.02981	1.12619	1.39098	1.31921	1.28473	1.25476	1.1039	1.07647	1.00029	0.817105	0.723293	0.673968	0.580494	0.132037	0.05373	0.00124477	0.128023	0.0104136	-0.0648077	-0.142233	-0.116045	-0.182194	-0.125464	-0.248307	-0.0592557	-0.0940415	-0.0522026	0.0729876	0.179876	0.139035	0.154628	0.259086	0.298524	0.240213	0.173877	0.120128	0.235568	0.208598	-0.100078	-0.24715	-0.359476
chr6:Slc6a11		0.98167	0.98167	0.98167	0.98167	0.98167	0.98167	0.976715	0.98749	0.949941	0.933944	0.965707	0.948405	0.929803	0.931269	0.912885	0.974616	0.939028	0.933756	0.933801	0.930945	0.982217	0.973329	0.984358	0.984273	0.961003	0.992469	0.963136	0.969687	0.94483	0.927751	0.949871	0.905982	0.933333	0.885884	0.896827	0.894402	0.889367	0.885088	0.901538	0.922505	0.931942	0.907654	0.913337	0.859314	0.886092	0.851583	0.876196	0.860049
chr14:Slmap		0.979651	0.979651	0.979651	0.979651	0.979651	0.979651	0.967211	0.950374	0.989648	0.984443	0.98676	0.988494	0.962198	0.931598	0.919589	0.924755	0.908394	0.937047	0.919342	0.867056	0.916543	0.879324	0.800883	0.766078	0.768884	0.806139	0.772535	0.742576	0.697198	0.714907	0.695705	0.661435	0.67597	0.705735	0.710923	0.688663	0.643256	0.614855	0.61461	0.652924	0.626088	0.616254	0.603805	0.529493	0.53513	0.548045	0.599426	0.627697
chr10:Micu1		0.978123	0.978123	0.978123	0.978123	0.978123	0.978123	1.18519	1.22553	1.29873	1.41631	1.43146	1.49546	1.5	1.30803	1.2804	1.5	1.44065	1.21808	1.07111	1.11527	1.06934	0.858767	0.696255	0.499769	0.694878	0.852231	0.837283	0.811575	0.841525	0.864244	0.837113	0.948399	0.97339	0.951767	0.933817	0.852571	0.874088	0.778414	0.797617	0.716957	0.752379	0.65973	0.63966	0.813502	0.671403	0.738127	0.764609	0.645009
chr4:Tmem245		0.976178	0.976178	0.976178	0.976178	0.976178	0.976178	0.990338	0.98108	1.04018	1.20262	1.35186	1.5	1.5	1.5	1.37867	1.24246	1.30343	1.3134	1.3148	1.21965	0.984476	0.815539	0.645098	0.521391	0.450583	0.479194	0.469943	0.209018	0.165469	0.16202	0.114829	0.0813765	-0.022282	-0.157367	-0.0766047	-0.0899715	-0.0126253	0.218314	0.492675	0.702416	0.558131	0.671491	0.788116	0.968424	1.22635	1.27676	1.26878	1.32238
chr11:1810010H24Rik		0.975282	0.975282	0.975282	0.975282	0.975282	0.975282	0.995185	0.984712	0.912183	0.869346	0.858612	0.92778	0.919034	0.917846	0.950362	0.898193	0.851389	0.785857	0.79734	0.840024	0.859586	0.8801	0.96671	0.990855	0.954407	1.011	1.10319	1.04399	1.07771	1.00913	1.02555	1.06177	0.971152	0.852762	0.813314	0.84646	0.857691	0.82234	0.868392	0.906153	0.951905	0.907816	0.886871	0.932725	0.872801	0.785278	0.708554	0.49472
chr5:BC005561		0.97519	0.97519	0.97519	0.97519	0.97519	0.97519	1.06734	1.13632	1.068	1.02459	0.988434	1.01325	1.09506	1.12875	1.15092	1.10043	0.968847	0.997747	1.04756	1.01015	0.900293	0.935041	0.854753	0.699344	0.799488	0.69002	0.695474	0.725692	0.563693	0.551389	0.653546	0.792489	0.717801	0.781317	0.797165	0.729281	0.838435	0.835404	0.875331	0.961701	0.952152	0.904238	0.863012	0.85344	0.864309	0.950722	0.836025	0.733903
chr8:Cyba		0.975122	0.975122	0.975122	0.975122	0.975122	0.975122	0.942824	0.904758	0.89663	0.844649	0.875287	0.874189	0.805092	0.807444	0.770465	0.711853	0.773108	0.844011	0.871698	0.975981	1.13996	1.15925	1.22832	1.40459	1.36679	1.42645	1.48372	1.37107	1.32961	1.22722	1.08604	0.964559	0.892284	0.874527	0.711074	0.694751	0.731202	0.749033	0.78371	0.786912	0.813209	0.841755	0.719177	0.696192	0.659739	0.64245	0.598692	0.403636
chr4:Agbl4		0.974403	0.974403	0.974403	0.974403	0.974403	0.974403	1.1714	1.10512	1.12217	1.09667	1.11683	1.23867	1.18821	1.09624	1.22229	1.20747	1.11243	0.8884	0.782022	0.682796	0.475044	0.407683	0.073403	0.0832542	0.068857	-0.128033	-0.17583	-0.237152	-0.216671	-0.00438584	-0.058062	0.0452782	0.100809	0.338062	0.436811	0.649564	0.750199	0.744982	0.931787	1.04467	0.979015	1.11235	1.30553	1.45549	1.5	1.5	1.37669	1.20897
chr5:Gsap		0.973276	0.973276	0.973276	0.973276	0.973276	0.973276	1.11059	1.16618	1.25536	1.31755	1.31614	1.29385	1.38009	1.41037	1.33274	1.28568	1.31224	1.19466	1.0922	0.945274	0.832962	0.758513	0.738953	0.637933	0.552496	0.576864	0.546199	0.515423	0.555472	0.555292	0.622012	0.708154	0.744678	0.784582	0.865384	0.936808	0.962257	0.999096	1.02962	1.01603	1.15036	1.14129	1.05967	1.03002	1.04385	0.963879	0.83867	0.801808
chr7:Fgfr2		0.973023	0.973023	0.973023	0.973023	0.973023	0.973023	1.07412	1.02723	1.08944	1.11631	1.178	1.1802	1.1856	1.27484	1.27885	1.21976	1.09165	0.927558	0.845097	0.725378	0.594125	0.467877	0.3605	0.317259	0.243329	0.0920071	0.163843	0.200407	0.30399	0.417749	0.592155	0.676641	0.856092	0.992024	1.06771	1.12485	1.33186	1.3825	1.49487	1.5	1.48904	1.40295	1.3543	1.25489	1.1513	1.05779	0.965602	0.803469
chr4:Rere		0.972963	0.972963	0.972963	0.972963	0.972963	0.972963	1.0002	0.958561	0.947171	1.05483	1.02101	1.05545	1.08337	1.01359	0.793755	0.661849	0.492361	0.335949	0.260264	0.0397265	-0.311074	-0.492185	-0.684631	-0.930329	-0.941847	-1.03728	-0.892127	-0.920408	-0.766864	-0.844372	-0.777623	-0.592837	-0.577227	-0.547451	-0.50182	-0.517559	-0.456357	-0.494046	-0.356225	-0.495461	-0.304848	-0.353802	-0.398741	-0.35293	-0.227258	-0.190318	-0.250541	-0.391445
chr7:Plekha7		0.971989	0.971989	0.971989	0.971989	0.971989	0.971989	1.08245	1.04451	1.09577	1.03729	1.03901	1.13329	1.12807	1.1477	1.08991	0.968794	0.869677	0.639527	0.638393	0.565622	0.49883	0.350403	0.217695	0.117826	0.0658919	0.0468459	0.0835053	0.185593	0.442006	0.378599	0.415607	0.460956	0.619899	0.697972	0.755486	0.816443	0.894264	0.958905	0.934075	0.873037	1.04497	1.02173	1.10982	1.04285	1.02774	1.10216	1.07096	0.978557
chr2:Ckap5		0.970331	0.970331	0.970331	0.970331	0.970331	0.970331	1.06752	0.964898	0.93382	0.82708	0.728425	0.556022	0.586793	0.416471	0.449093	0.296372	0.226211	0.0435108	0.0630634	0.168166	0.0934816	0.134714	0.179671	0.259044	0.427282	0.424257	0.405321	0.357218	0.337963	0.206168	0.197469	0.315048	0.310234	0.307137	0.175409	0.172567	0.113538	0.267396	0.435088	0.617992	0.703236	0.634545	0.798308	0.836119	0.745234	0.771918	0.729047	0.728009
chr1:Hdac4		0.970253	0.970253	0.970253	0.970253	0.970253	0.970253	1.04264	1.07876	1.13394	1.20251	1.26101	1.32658	1.27847	1.40078	1.27875	1.20419	1.0365	0.942286	0.841122	0.760332	0.715168	0.606861	0.494715	0.414025	0.252618	0.235272	0.26496	0.358322	0.319	0.39304	0.333582	0.299264	0.373974	0.418631	0.539396	0.638822	0.704093	0.72588	0.776239	0.909167	0.990923	1.08376	1.26801	1.29837	1.37001	1.36825	1.28455	1.20149
chr1:Prex2		0.969686	0.969686	0.969686	0.969686	0.969686	0.969686	1.02608	0.992325	0.982235	1.07398	1.08971	1.06998	1.05768	1.0506	1.07967	1.02012	1.02193	0.97571	0.979028	0.942506	0.868341	0.846482	0.836506	0.803336	0.793923	0.750905	0.727289	0.692723	0.713049	0.72176	0.723607	0.749413	0.740945	0.708979	0.731139	0.719985	0.758538	0.779531	0.816885	0.801805	0.786749	0.80896	0.787932	0.809407	0.856362	0.837829	0.817837	0.791371
chr5:Lrrc8c		0.968392	0.968392	0.968392	0.968392	0.968392	0.968392	1.04304	1.11886	1.16976	1.34364	1.41974	1.5	1.5	1.41438	1.44281	1.38558	1.30052	1.07464	0.845363	0.635442	0.364968	0.120425	-0.0721067	-0.183561	-0.295749	-0.45021	-0.480415	-0.505859	-0.337589	-0.291919	-0.147381	-0.0805698	0.103163	0.237843	0.291471	0.464024	0.607152	0.74635	0.753072	0.79014	0.995986	0.979652	1.05583	0.965874	1.00608	1.07486	0.928117	0.871309
chr2:Itch		0.965722	0.965722	0.965722	0.965722	0.965722	0.965722	1.15561	1.46539	1.5	1.48756	1.34151	1.32549	1.27844	1.20125	1.16517	1.11953	0.909355	0.577795	0.28486	-0.444466	-0.747534	-0.781481	-0.708118	-0.857288	-0.848308	-1.07128	-1.01385	-0.724271	-0.663407	-0.842895	-0.568126	-0.335221	-0.465512	-0.508433	-0.366134	-0.444867	-0.218106	-0.261425	-0.48935	-0.580872	-0.38115	-0.489367	-0.499053	-0.408141	-0.38226	-0.488096	-0.588725	-0.633126
chr12:Prkd1		0.964075	0.964075	0.964075	0.964075	0.964075	0.964075	0.977898	1.06112	0.987203	0.974038	1.02053	1.12452	1.0881	1.03621	0.92286	0.940145	0.59252	0.292136	0.234051	-0.0147488	-0.164246	-0.569477	-0.979636	-1.02442	-1.3823	-1.4273	-1.5	-1.5	-1.32416	-1.42871	-1.16418	-1.13347	-0.980558	-0.679949	-0.547386	-0.329254	-0.265429	-0.100238	0.104459	0.159945	0.185658	0.0130017	0.225631	0.276223	0.25575	-0.000393359	-0.0550704	-0.0381223
chr5:Rufy3		0.964054	0.964054	0.964054	0.964054	0.964054	0.964054	1.00263	0.998479	1.21474	1.39824	1.33806	1.35858	1.36595	1.27388	1.14424	1.13438	1.02702	1.01904	0.653729	0.508281	0.331202	0.202553	-0.105343	-0.0154439	-0.239165	-0.221552	-0.36363	-0.64349	-0.812331	-0.70296	-0.892304	-0.99696	-0.78419	-0.469057	-0.636863	-0.361995	-0.421178	-0.518516	-0.294476	-0.249437	-0.331467	-0.138977	0.0823751	0.0824814	0.0267199	-0.0317643	-0.194664	-0.443744
chr18:Mcc		0.962319	0.962319	0.962319	0.962319	0.962319	0.962319	1.11483	1.18165	1.14978	1.21547	1.5	1.42886	1.5	1.5	1.45005	1.27801	1.15372	0.92757	0.595098	0.371388	0.0481863	-0.401017	-0.413931	-0.615822	-0.698317	-0.872815	-0.866828	-0.772775	-0.638773	-0.37814	-0.0394403	0.125061	0.331882	0.44897	0.622911	0.680514	0.941891	0.992921	1.14964	1.22358	1.20391	1.11949	1.3179	1.28849	1.23534	1.29862	1.30732	1.2578
chr12:Strn3		0.961805	0.961805	0.961805	0.961805	0.961805	0.961805	1.02207	1.07589	1.13843	1.17107	1.18828	1.14712	1.19804	1.21997	1.14771	1.17212	1.15072	1.12416	0.988728	0.921941	0.814857	0.80993	0.785444	0.747299	0.687635	0.648254	0.622914	0.648484	0.652036	0.695422	0.72866	0.82569	0.890842	0.929663	0.900619	0.973357	0.964245	0.875083	0.904919	0.947928	0.903632	0.847357	0.826419	0.792638	0.83917	0.862954	0.865085	0.91239
chr9:Alas1		0.961033	0.961033	0.961033	0.961033	0.961033	0.961033	0.916815	0.931098	0.954781	0.887849	0.902771	0.88586	0.849776	0.920271	0.920059	0.991841	1.00527	1.00542	1.02074	0.989321	1.13169	1.10302	1.24748	1.20716	1.15435	1.15899	1.09701	0.998943	1.09584	1.04277	1.02454	0.90269	1.00515	0.833056	0.876171	0.887641	0.804357	0.797092	0.813147	0.725734	0.77611	0.701391	0.728149	0.746066	0.820933	0.824289	0.795641	0.878294
chr1:Gm26936		0.96062	0.96062	0.96062	0.96062	0.96062	0.96062	0.91466	1.00339	1.08813	1.08769	1.19149	1.24168	1.24701	1.25599	1.24466	1.29914	1.36389	1.47698	1.3396	1.16371	1.07106	0.976898	0.921552	0.843058	0.742373	0.732481	0.653583	0.665253	0.553062	0.635061	0.740486	0.885735	0.86195	0.91375	1.02922	1.17284	1.13585	1.13302	1.12526	1.11305	1.07276	0.954693	0.885566	0.899718	0.868664	0.709892	0.630396	0.544229
chr7:Folh1		0.960194	0.960194	0.960194	0.960194	0.960194	0.960194	1.00086	1.012	1.05304	1.08443	1.10934	1.13923	1.13109	1.06953	1.08814	1.05514	1.01331	0.979	0.903012	0.807252	0.725544	0.598739	0.471227	0.376435	0.369723	0.347508	0.314818	0.334747	0.335787	0.328253	0.377665	0.452759	0.548195	0.653934	0.765733	0.832203	0.82971	0.862234	0.889072	0.931378	1.00852	1.01049	0.988521	0.977521	0.998986	0.985461	0.921803	0.924072
chr5:Epha5		0.959939	0.959939	0.959939	0.959939	0.959939	0.959939	1.00419	1.00174	1.03467	1.08202	1.08012	1.10182	1.11883	1.14302	1.1371	1.12948	1.07237	1.0182	0.94537	0.885393	0.816251	0.755059	0.683713	0.633902	0.570259	0.524215	0.496632	0.471911	0.48609	0.537233	0.567398	0.609719	0.658911	0.724796	0.757991	0.821021	0.884797	0.945246	1.02233	1.06919	1.09881	1.14628	1.21056	1.23275	1.21887	1.22931	1.18128	1.13537
chr9:Ppp2r3a		0.959344	0.959344	0.959344	0.959344	0.959344	0.959344	1.139	1.36415	1.5	1.42797	1.22059	1.34677	1.32468	1.34689	1.48775	1.5	1.48408	1.37082	1.19058	1.07227	1.06249	1.13681	0.973967	0.901812	0.719558	0.664977	0.46786	0.418816	0.385541	0.34046	0.215115	0.305419	0.299294	0.360626	0.333014	0.448847	0.495141	0.54769	0.552707	0.608759	0.822368	0.936206	0.939275	0.870118	0.881896	0.975403	1.17087	1.05406
chr4:Tmem59		0.959243	0.959243	0.959243	0.959243	0.959243	0.959243	0.960128	0.891496	0.961506	0.875551	0.858183	0.88461	0.853895	0.90515	0.921657	0.870886	0.792872	0.816125	0.898687	0.958288	1.01134	1.01616	1.04658	1.07069	1.08831	1.0758	1.12837	1.22746	1.17103	1.12225	1.04256	1.07326	1.08877	1.07269	1.02932	0.959768	0.958199	0.965951	0.936992	0.897385	0.935363	0.926046	0.816708	0.761454	0.642314	0.533404	0.512732	0.387741
chr1:Atp2b4		0.958391	0.958391	0.958391	0.958391	0.958391	0.958391	0.972686	0.940164	0.925011	0.915422	0.717607	0.773894	0.657049	0.599507	0.548728	0.601767	0.707425	0.685515	0.696588	0.720661	0.742577	0.814523	0.724418	0.838634	0.815349	0.839494	0.85454	0.800905	0.756016	0.681752	0.687861	0.712334	0.680022	0.714252	0.751002	0.752979	0.779976	0.747662	0.670377	0.644791	0.671135	0.602415	0.554597	0.599812	0.602922	0.570132	0.755654	0.775467
chr5:Adam22		0.958227	0.958227	0.958227	0.958227	0.958227	0.958227	1.00055	1.0072	1.03947	1.08098	1.10363	1.1285	1.14494	1.1011	1.13195	1.09898	1.0467	1.01418	0.994681	0.917722	0.850854	0.791379	0.7617	0.69175	0.699075	0.623921	0.64473	0.62064	0.60361	0.630879	0.663243	0.690123	0.738841	0.769525	0.820325	0.868572	0.965313	0.981336	1.01202	1.02579	1.03009	1.03805	1.10101	1.07003	1.06699	1.06632	1.04852	0.971109
chr1:Ralgps2		0.957174	0.957174	0.957174	0.957174	0.957174	0.957174	1.01856	1.04289	0.923714	0.901779	0.949293	0.950307	0.935986	0.875913	0.850665	0.773891	0.722711	0.711745	0.733327	0.788797	0.923352	0.883494	0.822557	0.879793	0.865449	0.826208	0.842403	0.916579	0.923981	0.983472	1.07502	0.981593	0.998227	1.03712	0.926609	0.93923	0.905828	0.972925	0.92204	0.826551	0.768752	0.688594	0.686521	0.772244	0.810815	0.744485	0.72601	0.77552
chr3:Pag1		0.955394	0.955394	0.955394	0.955394	0.955394	0.955394	0.868816	0.903433	0.818701	0.775461	0.795457	0.795315	0.965406	0.932147	1.04698	1.10751	1.10107	1.1514	1.10785	1.06216	1.04964	1.02669	0.930943	0.818575	0.839243	0.663383	0.654721	0.567266	0.500442	0.560126	0.537077	0.480478	0.57769	0.765697	0.71671	0.708976	0.912369	0.892437	0.984845	1.06231	0.996607	1.0868	1.2503	1.24989	1.15479	1.19268	1.12773	0.994044
chr2:Ptprj		0.954871	0.954871	0.954871	0.954871	0.954871	0.954871	0.802227	0.866723	0.76635	0.75151	0.795313	0.831183	0.894635	0.844439	0.667518	0.554511	0.499465	0.385068	0.0880164	0.0344244	-0.157034	-0.381257	-0.558399	-0.664402	-0.66128	-0.626685	-0.524555	-0.576349	-0.474898	-0.378395	-0.441909	-0.269197	-0.147561	0.0698897	0.0861183	0.150894	0.256012	0.364792	0.565354	0.600587	0.758854	0.929268	1.02998	1.01722	1.00884	1.18079	1.27055	1.14514
chr13:Atxn1		0.95436	0.95436	0.95436	0.95436	0.95436	0.95436	0.96422	0.897537	0.830326	0.883461	0.777013	0.725219	0.793868	0.668131	0.699564	0.622933	0.512898	0.474561	0.432769	0.46277	0.331203	0.263369	0.193115	-0.00396666	0.0200637	0.0458259	-0.0509473	0.0793002	0.0653232	0.0907951	0.0595741	0.083845	0.149543	0.254693	0.407434	0.423962	0.433952	0.576393	0.576949	0.683087	0.722529	0.755653	0.832266	0.999493	1.01578	1.032	1.00604	0.993963
chr7:Ctsc		0.953827	0.953827	0.953827	0.953827	0.953827	0.953827	0.956141	0.93414	0.857169	0.839906	0.810814	0.733246	0.83197	0.876597	0.814421	0.729811	0.790049	0.845547	0.911737	1.03729	1.07847	1.18442	1.2748	1.19139	1.21877	1.28908	1.41591	1.4417	1.34409	1.34245	1.28195	1.24901	1.16123	1.07637	1.07103	1.00884	0.98239	0.904661	0.866009	0.822083	0.782273	0.762204	0.680535	0.608533	0.650015	0.527905	0.534275	0.434004
chr7:Hif3a		0.95361	0.95361	0.95361	0.95361	0.95361	0.95361	1.04218	1.07696	1.20192	1.24872	1.31269	1.36652	1.36028	1.37607	1.5	1.39691	1.28159	1.09353	0.997302	0.839032	0.706505	0.5824	0.397068	0.252139	0.205403	0.0397837	-0.0191101	-0.0310925	-0.0425505	0.00760008	0.0905596	0.229922	0.300025	0.462576	0.54676	0.653716	0.824685	0.914528	1.00552	1.07682	1.16072	1.09782	1.00057	1.09444	1.0614	1.05187	0.899799	0.852991
chr5:Gm3716		0.949625	0.949625	0.949625	0.949625	0.949625	0.949625	1.02166	1.07881	1.07946	1.03842	0.977929	0.935465	0.93101	0.920592	0.993804	1.05574	0.927617	0.876259	0.806418	0.823276	0.834895	0.85852	0.892857	0.853002	0.880694	0.84895	0.843819	0.910818	0.860249	0.87361	0.798679	0.890215	0.931604	0.924629	0.954027	0.972553	0.996823	0.918695	0.940343	0.961064	0.975491	1.08987	1.02362	1.05887	0.968892	0.916726	0.849439	0.887155
chr5:Atp2a2		0.947348	0.947348	0.947348	0.947348	0.947348	0.947348	0.983516	1.19856	1.03592	1.02347	1.12624	1.24893	1.40289	1.28113	1.01399	1.01365	1.00464	1.27666	1.2185	1.17672	1.17104	1.07392	1.03469	0.855582	0.984976	1.15701	1.18413	1.18103	0.8582	0.899003	0.717647	0.605686	0.668109	0.65643	0.643914	0.70475	0.79257	0.90234	0.86992	0.907677	0.673785	0.753381	0.956224	0.943971	0.809316	0.760773	0.673136	0.66279
chr7:Six5		0.947256	0.947256	0.947256	0.947256	0.947256	0.947256	0.97257	1.01329	1.032	1.03783	0.920576	0.953597	1.01669	1.13538	1.11218	1.09706	1.07839	1.07744	1.08849	1.05707	0.965662	1.05445	1.04212	0.944579	0.829411	0.833197	0.898133	0.85676	0.754661	0.683996	0.682733	0.715621	0.690253	0.666847	0.689483	0.75112	0.61299	0.554181	0.701495	0.806045	0.90578	0.896943	1.01335	1.0066	1.02597	1.0347	0.998246	1.16321
chr10:Aig1		0.946569	0.946569	0.946569	0.946569	0.946569	0.946569	1.13502	1.37271	1.39952	1.15006	0.991331	1.08734	1.33892	1.5	1.5	1.5	1.5	1.5	1.34382	1.19421	1.22501	1.06559	0.970257	0.872627	0.498773	0.38886	0.267898	0.205993	0.438978	0.353617	0.184181	0.152646	0.11957	0.0296467	-0.163279	-0.0858904	0.118063	0.171058	0.257994	-0.0443696	-0.0689882	0.0566952	0.158965	0.126311	0.028334	0.127391	-0.143647	-0.468068
chr10:Reep3		0.945744	0.945744	0.945744	0.945744	0.945744	0.945744	0.932142	1.04602	1.04773	1.05751	1.18511	1.33879	1.30471	1.31183	1.33489	1.28084	1.28732	1.30825	1.03921	1.08104	0.880016	0.671493	0.721139	0.703977	0.548928	0.424991	0.482773	0.503612	0.480831	0.496497	0.393438	0.549821	0.478584	0.451539	0.539763	0.646956	0.678616	0.710309	0.737855	0.797725	0.843176	0.838896	0.779344	0.933953	0.948582	0.811414	0.808378	0.904116
chr1:Gm29260		0.945438	0.945438	0.945438	0.945438	0.945438	0.945438	0.965902	0.981372	0.989074	1.02576	1.0549	0.991562	1.00399	1.01316	0.95148	0.963118	0.9725	0.987181	0.988357	0.96625	0.932115	0.902831	0.941956	0.950058	0.900135	0.916296	0.899873	0.933447	0.927519	0.932099	0.928545	0.952126	0.966127	0.970273	0.975139	0.974846	0.963559	0.93902	0.928281	0.922803	0.946906	0.940172	0.887033	0.89184	0.891973	0.857989	0.898162	0.891178
chr1:Dner		0.94234	0.94234	0.94234	0.94234	0.94234	0.94234	1.00515	1.02138	0.984082	0.99826	1.02327	1.04717	1.15131	1.16859	1.17171	1.09727	1.02258	1.0086	0.95249	0.936434	0.933709	0.897845	0.965971	0.863537	0.847271	0.821335	0.863704	0.820888	0.840588	0.7967	0.80409	0.822124	0.815779	0.733667	0.774497	0.794732	0.819677	0.877013	0.980754	0.884427	0.894197	0.917908	0.902296	0.94949	0.970457	0.924668	0.964986	0.985839
chr6:Gm43291		0.94114	0.94114	0.94114	0.94114	0.94114	0.94114	0.802388	0.752083	0.440724	0.500631	0.473209	0.411625	0.431605	0.378873	0.328098	0.335901	0.790733	1.13532	1.12825	1.20589	1.14097	1.17394	1.2336	1.34799	1.32818	1.34094	1.39987	0.941397	0.741358	0.706362	0.609114	0.577536	0.455955	0.398094	0.25757	0.276971	0.53991	0.479528	0.508191	0.370977	0.638726	0.965165	0.932038	1.18604	1.29766	1.5	1.5	1.5
chr14:Gpc6		0.937049	0.937049	0.937049	0.937049	0.937049	0.937049	1.02529	1.00977	1.11324	1.19119	1.12953	1.02264	1.05108	1.10903	1.10848	0.995169	0.936735	0.839113	0.849106	0.758712	0.667823	0.637052	0.651369	0.589063	0.427515	0.409795	0.487085	0.539195	0.582979	0.521851	0.551153	0.556874	0.647124	0.71311	0.815161	0.932561	0.980079	1.01737	0.992573	0.952266	1.04974	1.09554	1.17533	1.22589	1.27992	1.26645	1.24866	1.18491
chr4:Ece1		0.936496	0.936496	0.936496	0.936496	0.936496	0.936496	1.00251	0.995305	0.985507	1.00971	0.978954	0.917278	1.02391	1.00033	0.871516	0.821315	0.800334	0.688596	0.690465	0.723543	0.804938	0.811223	0.845783	0.740137	0.758691	0.859033	0.924018	0.934769	1.0143	1.08596	1.04798	0.944317	0.961301	0.995847	0.937032	0.942741	1.02435	0.947677	0.909346	0.954152	0.890826	0.925207	1.01646	0.974666	0.918728	1.03336	1.02569	0.98222
chr1:Ino80dos		0.936162	0.936162	0.936162	0.936162	0.936162	0.936162	0.953826	0.879312	1.05596	1.19328	1.29824	1.28494	1.21555	1.31889	1.40783	1.40193	1.48748	1.45573	1.48877	1.37063	1.21838	0.967937	0.875395	0.918278	0.801428	0.593984	0.531246	0.471171	0.491153	0.492631	0.346261	0.437603	0.565062	0.55475	0.672079	0.583994	0.598203	0.583221	0.590394	0.664581	0.616861	0.785261	0.718597	0.856349	1.00742	0.874789	0.829264	0.780618
chr13:Zswim6		0.935747	0.935747	0.935747	0.935747	0.935747	0.935747	0.831346	0.749542	0.753627	0.69939	0.648334	0.737607	0.6514	0.626042	0.597165	0.462754	0.338836	0.35253	0.406754	0.381562	0.37498	0.377733	0.330044	0.209066	0.274766	0.306158	0.402941	0.531831	0.553557	0.506984	0.432868	0.456033	0.42569	0.486078	0.72573	0.751779	0.789853	0.891624	0.806547	0.789246	0.822039	0.864464	0.849676	0.901636	0.868336	0.821246	0.757097	0.830589
chr5:Bmp3		0.93545	0.93545	0.93545	0.93545	0.93545	0.93545	0.881064	0.936092	0.889771	0.859707	0.868883	0.835882	0.839373	0.805108	0.83009	0.833117	0.756798	0.786884	0.866677	0.913686	0.920043	1.00885	0.960394	1.03843	1.02192	1.02704	1.09481	1.04438	1.02255	0.942437	0.922308	0.937148	0.821277	0.806363	0.720524	0.688816	0.641649	0.50987	0.474449	0.47958	0.378137	0.325096	0.286335	0.328076	0.419088	0.454494	0.47297	0.520281
chr3:Dapp1		0.93504	0.93504	0.93504	0.93504	0.93504	0.93504	0.990079	0.999382	1.0552	1.08127	1.17406	1.29793	1.14819	1.26628	1.27505	1.27633	1.18681	1.10428	1.02013	0.933524	0.807869	0.60618	0.481051	0.467704	0.401482	0.30004	0.203236	0.271178	0.305894	0.29237	0.295561	0.409141	0.526477	0.602761	0.667766	0.745893	0.768778	0.886724	0.897668	0.958501	0.97287	0.9912	0.95267	0.926127	0.964459	0.869043	0.792421	0.83574
chr14:Selk		0.933511	0.933511	0.933511	0.933511	0.933511	0.933511	0.837518	0.629323	0.596524	0.338572	0.357776	0.502713	0.788914	0.898541	0.813769	0.721915	0.679517	0.838579	1.00089	1.03601	1.36136	1.35704	1.13233	0.976482	0.931461	0.928873	1.0219	0.933331	0.722599	0.56112	0.529751	0.34521	0.664918	0.771129	0.82452	0.994981	1.03449	0.987617	1.13202	1.25803	1.34788	1.24431	1.33508	1.05315	0.926944	0.91815	0.687763	0.790328
chr19:Rtn3		0.932413	0.932413	0.932413	0.932413	0.932413	0.932413	0.932507	0.936259	0.95105	0.919881	0.89982	0.912127	0.927439	0.964844	0.933506	0.927238	0.943189	0.952543	0.991753	0.970637	0.995353	1.0317	1.01741	1.0192	0.994095	0.994919	0.990294	0.939732	0.945912	0.900338	0.909884	0.891481	0.855773	0.878098	0.886279	0.889717	0.876785	0.855319	0.834154	0.795507	0.774172	0.759333	0.721755	0.72582	0.7559	0.734756	0.708612	0.72889
chr4:Tmem234		0.931092	0.931092	0.931092	0.931092	0.931092	0.931092	0.798888	0.964739	0.806172	0.864603	0.77039	0.569934	0.611744	0.892766	0.91906	1.05967	1.16425	1.29035	1.0382	1.19449	1.31415	1.5	1.5	1.5	1.46774	1.37322	1.35569	1.1914	1.1443	1.17028	1.05305	0.908974	0.646106	0.518277	0.525062	0.533964	0.644345	0.550847	0.676996	0.747103	0.678679	0.722871	0.661886	0.662131	0.697226	0.594162	0.509385	0.329334
chr9:Hacd3		0.930824	0.930824	0.930824	0.930824	0.930824	0.930824	0.826681	0.886318	0.796224	0.722798	0.610808	0.693622	0.834948	0.740478	0.760444	0.728887	0.738102	0.808429	0.831291	0.788334	0.779868	1.06774	1.13389	1.0194	1.23917	1.24026	1.179	1.19751	1.21489	1.1009	1.238	1.19272	0.955765	0.840681	0.850334	0.882077	0.882937	0.858745	0.680049	0.387798	0.596417	0.494603	0.675675	0.897196	0.958959	0.962771	0.743782	0.687903
chr9:Nedd4		0.930762	0.930762	0.930762	0.930762	0.930762	0.930762	0.961479	1.08094	1.02343	1.09603	1.08686	1.05759	1.12017	1.07588	1.02351	1.13648	1.11088	1.02446	0.931711	1.01466	0.907067	0.909641	0.936155	0.919334	0.866139	0.910481	0.922263	0.911391	0.916764	0.917781	0.826425	0.872277	0.849252	0.796474	0.662151	0.627124	0.592009	0.598289	0.566302	0.565507	0.653423	0.604862	0.544335	0.65876	0.686799	0.803935	0.95151	1.00754
chr15:Rapgef3		0.929726	0.929726	0.929726	0.929726	0.929726	0.929726	0.947986	0.926866	1.01556	0.983284	1.08096	1.07744	1.15265	1.14715	1.12407	1.14357	1.09081	1.03525	1.04271	0.866764	0.948478	0.845067	0.913734	0.837432	0.876076	0.936626	0.956462	0.959143	0.968996	0.885081	0.935743	0.91207	0.903878	0.842128	0.851044	0.879638	0.84323	0.767681	0.672637	0.583618	0.656938	0.67873	0.628794	0.642446	0.704247	0.654427	0.596563	0.67809
chr1:Ino80d		0.92943	0.92943	0.92943	0.92943	0.92943	0.92943	1.00561	0.951018	1.04901	1.16511	1.02184	1.25288	1.15078	1.09283	1.09449	1.16405	1.02428	1.05036	1.00845	0.991063	0.868371	0.957528	0.794992	0.783725	0.858939	0.925582	0.922925	0.968121	0.928388	0.928642	0.894736	1.02929	0.878857	0.956195	0.943021	0.871233	1.00377	0.909628	0.886081	0.851389	0.859939	0.863831	0.807056	0.990394	0.916612	0.852534	0.922932	0.701321
chr2:Hsd17b12		0.929277	0.929277	0.929277	0.929277	0.929277	0.929277	0.827698	0.843968	0.799863	0.862772	0.946033	1.16828	0.960934	1.19709	1.14955	1.04122	1.03645	1.00341	0.935265	1.06799	1.09013	1.03285	1.2067	1.34534	1.23968	1.029	1.15719	0.921701	0.954454	1.23575	1.13345	1.16982	1.09313	0.714698	0.635383	0.476456	0.751118	0.654435	0.788444	0.928714	0.854811	0.864236	0.743968	0.767685	0.678547	0.68169	0.749408	0.584741
chr2:Cd44		0.928897	0.928897	0.928897	0.928897	0.928897	0.928897	0.929109	0.914138	0.909584	0.885844	0.879582	0.879783	0.863039	0.909508	0.963991	0.96446	0.942638	0.921628	0.944651	0.905187	0.882967	0.828095	0.848627	0.86577	0.822025	0.725461	0.698188	0.661675	0.680432	0.648039	0.674474	0.703448	0.737133	0.691405	0.692038	0.686358	0.694287	0.706199	0.726967	0.748	0.762714	0.782428	0.769275	0.76276	0.821524	0.823184	0.880937	0.920326
chr10:Hsp90b1		0.928849	0.928849	0.928849	0.928849	0.928849	0.928849	0.800299	0.746509	0.845233	0.666992	0.740885	0.728502	0.776319	0.90955	0.807587	0.858471	0.834755	1.08074	1.25533	1.22897	1.44183	1.46889	1.5	1.5	1.37827	1.3541	1.25944	1.2807	1.1717	0.954566	0.856671	0.759617	0.672833	0.467591	0.481782	0.372379	0.38004	0.427431	0.469647	0.482856	0.546416	0.473512	0.321172	0.303191	0.450781	0.415226	0.519582	0.587274
chr2:Rcn1		0.928798	0.928798	0.928798	0.928798	0.928798	0.928798	0.889251	0.817527	0.838406	0.746407	0.653892	0.613287	0.493152	0.49156	0.451809	0.524473	0.531722	0.717373	0.894692	0.915099	1.04452	1.17932	1.39726	1.45958	1.47748	1.5	1.5	1.5	1.4022	1.21757	1.15346	0.99368	0.868212	0.65836	0.74684	0.751666	0.601786	0.557003	0.554957	0.3722	0.385024	0.224014	0.30132	0.254981	0.31677	0.210481	0.255548	0.298819
chr5:Ube2k		0.927769	0.927769	0.927769	0.927769	0.927769	0.927769	0.659441	0.605613	0.38914	0.493709	0.37397	0.163016	0.160958	0.028381	-0.049544	0.0250995	-0.220822	-0.33688	-0.250998	-0.282358	-0.561523	-0.432697	-0.552155	-0.724512	-0.887317	-0.787393	-0.896332	-0.946458	-0.85598	-0.775793	-0.717068	-0.525729	-0.551126	-0.390123	-0.253009	-0.211692	-0.0849312	-0.121928	0.017677	0.0656771	0.090385	0.266151	0.20922	0.235129	0.567598	0.617137	0.991492	1.09549
chrX:Abcb7		0.926431	0.926431	0.926431	0.926431	0.926431	0.926431	0.971799	0.938077	0.923656	0.985947	0.905228	0.858574	0.926996	0.957568	0.90755	1.0021	1.03467	1.03348	1.06605	1.13924	1.14869	1.09499	1.09419	1.11643	1.01467	1.02354	0.915967	0.942508	0.907083	0.843161	0.888081	0.831287	0.937974	0.877165	0.830315	0.897661	0.869247	0.957693	0.832265	0.760089	0.708353	0.731406	0.857861	0.771235	0.798744	0.808767	0.856098	0.898136
chr5:Coq2		0.926254	0.926254	0.926254	0.926254	0.926254	0.926254	1.01709	1.06964	1.17075	1.22499	1.2234	1.21052	1.17796	1.21079	1.14184	1.06869	1.01216	0.989217	0.97228	0.920064	0.872303	0.829755	0.759756	0.803846	0.745791	0.692392	0.733229	0.790678	0.777072	0.754263	0.735226	0.785741	0.910726	0.876698	0.910062	0.880715	0.936123	0.998945	1.03119	0.995582	1.01198	1.04377	1.05913	0.933617	1.03388	0.965148	1.01688	0.987277
chr2:Frmd5		0.926029	0.926029	0.926029	0.926029	0.926029	0.926029	0.887574	0.757038	0.710525	0.984562	1.28966	1.5	1.5	1.42196	1.13159	1.15966	1.00501	0.711167	0.575813	0.343325	-0.060285	-0.433875	-0.903919	-1.26319	-1.5	-1.48638	-1.47516	-1.46913	-1.36095	-1.38203	-1.18091	-1.10414	-1.14004	-1.07045	-0.817431	-0.248955	-0.271607	-0.356706	-0.241565	-0.216534	-0.00264868	-0.0447253	0.183357	0.593711	0.899466	0.805583	0.566789	0.23253
chr3:Gucy1b3		0.925659	0.925659	0.925659	0.925659	0.925659	0.925659	0.901779	0.989493	0.912802	0.806118	0.700757	0.733073	0.622357	0.512763	0.589159	0.57335	0.578501	0.637145	0.597407	0.701851	0.814192	0.820575	0.809939	0.809797	0.869699	0.838012	0.84113	0.894214	0.921988	0.846299	0.797349	0.847528	0.894451	0.994415	0.94861	0.983457	0.9267	0.957258	0.960338	1.03182	1.10188	1.07176	0.978138	1.10469	1.07594	1.15105	1.20808	1.3144
chr14:Mmp14		0.92511	0.92511	0.92511	0.92511	0.92511	0.92511	0.88664	0.882285	0.865163	0.783139	0.828482	0.913157	0.856731	0.957395	1.02101	1.04267	1.06975	1.05785	1.01703	1.0163	1.03115	0.957552	1.00448	1.06225	0.987714	0.963526	0.944304	0.932425	0.996697	1.08713	1.07575	1.04818	1.08943	1.08127	0.970199	0.974916	0.874287	0.880666	0.91474	0.86062	0.795006	0.770322	0.775167	0.758027	0.695546	0.718203	0.729106	0.849264
chr14:Rb1		0.924407	0.924407	0.924407	0.924407	0.924407	0.924407	0.99449	1.01308	1.17182	1.17619	1.23864	1.39114	1.37078	1.34103	1.45275	1.5	1.5	1.43993	1.37613	1.12953	0.998156	0.902768	0.79252	0.83364	0.701311	0.557219	0.330039	0.276911	0.262545	0.15833	0.136759	0.161904	0.220882	0.217624	0.135592	0.116227	0.209794	0.284122	0.463425	0.569741	0.640707	0.628308	0.673	0.619623	0.654603	0.67524	0.614179	0.633373
chr6:Cttnbp2		0.9229	0.9229	0.9229	0.9229	0.9229	0.9229	0.972712	0.938748	0.900238	0.888007	0.829808	0.81906	0.817736	0.866704	0.899115	0.861925	0.835544	0.81507	0.765161	0.74148	0.773659	0.788151	0.778749	0.7167	0.589046	0.564057	0.570002	0.608084	0.56578	0.618294	0.668356	0.742848	0.77489	0.8214	0.934645	0.963633	1.12202	1.08931	1.17959	1.24604	1.29398	1.30255	1.24483	1.25368	1.20145	1.21339	1.31621	1.19444
chr7:4933406I18Rik		0.922443	0.922443	0.922443	0.922443	0.922443	0.922443	0.919117	0.715822	0.904182	1.03909	0.889418	0.861853	0.785244	0.819699	0.851723	0.831229	0.838131	0.579014	0.546405	0.306529	0.0875065	0.0133204	-0.0750976	-0.126076	-0.107312	-0.34924	-0.497796	-0.42338	-0.295025	-0.464517	-0.568743	-0.489799	-0.461066	-0.41259	-0.471054	-0.545362	-0.42057	-0.485512	-0.577094	-0.625897	-0.524012	-0.510927	-0.576408	-0.565925	-0.594986	-0.348165	-0.3147	-0.492462
chr12:Nova1		0.921949	0.921949	0.921949	0.921949	0.921949	0.921949	0.8916	0.886492	0.871576	0.928718	1.09032	0.965696	1.06827	1.00928	1.05858	1.01508	0.956794	0.969758	0.897507	0.781733	0.61807	0.406027	0.274175	0.128373	0.232607	0.179085	0.296048	0.319897	0.292438	0.236683	0.384152	0.525749	0.718334	0.859249	0.918611	0.774803	0.946086	1.02675	1.00876	1.05316	1.20352	1.12987	1.16561	1.1773	1.24829	1.2576	1.23351	1.17434
chr7:Rnf121		0.919758	0.919758	0.919758	0.919758	0.919758	0.919758	0.910236	0.913663	0.911899	0.933584	0.958521	0.993809	1.01064	1.00821	1.00426	1.06217	1.01461	1.05316	1.01301	1.01678	0.993025	0.971219	0.993163	1.00453	0.99897	1.00784	0.967589	0.998335	0.984923	1.00208	1.00822	1.00902	0.988219	0.99297	0.963864	0.983903	0.959527	0.986627	0.96675	0.954154	0.960455	0.940798	0.919279	0.936977	0.872392	0.890206	0.843458	0.842443
chr8:Gab1		0.919248	0.919248	0.919248	0.919248	0.919248	0.919248	1.203	1.07865	0.945225	1.03772	0.963855	1.01568	1.04792	0.911404	0.833757	0.739401	0.711778	0.430419	0.410945	0.481377	0.474127	0.372108	0.102477	0.093146	0.0435264	-0.0811779	-0.24912	-0.372253	-0.31243	-0.302122	-0.292661	-0.294864	-0.245722	-0.0849611	-0.235558	-0.19285	-0.0805572	-0.00569463	0.067398	0.0547429	-0.0040116	0.0810309	0.0597042	0.214271	0.178667	0.0965167	0.115718	0.115143
chr9:Gria4		0.919006	0.919006	0.919006	0.919006	0.919006	0.919006	0.930048	0.929729	0.918724	0.860431	0.862481	0.84482	0.855986	0.631524	0.677619	0.632241	0.664777	0.72599	0.830062	0.860164	0.914327	0.93052	0.823363	0.920917	0.989362	1.01519	1.03323	1.06481	1.08234	0.981227	0.880206	0.86212	0.78091	0.797452	0.71336	0.690664	0.739256	0.855574	0.893991	0.776574	0.815096	0.866956	0.914376	0.96482	0.982082	1.00377	1.10196	0.965824
chr19:Myof		0.918263	0.918263	0.918263	0.918263	0.918263	0.918263	1.01743	0.941172	1.04066	0.990179	0.902084	0.900829	0.82893	0.852676	0.689833	0.67976	0.906148	0.806896	0.867789	0.808525	0.813986	0.819328	0.758738	0.823966	0.822647	0.938782	0.915094	0.80999	0.738631	0.806139	0.716762	0.551859	0.456471	0.519755	0.495903	0.371742	0.250425	0.190261	0.104407	0.0893893	-0.105822	-0.208173	-0.197004	-0.180179	-0.223547	-0.371883	-0.31095	-0.282874
chr8:Wdr17		0.916344	0.916344	0.916344	0.916344	0.916344	0.916344	0.992621	0.964683	1.14848	1.23624	1.29132	1.31199	1.30203	1.36052	1.41646	1.47381	1.34555	1.28497	1.16501	1.03625	0.804168	0.80688	0.608618	0.565549	0.543924	0.389156	0.274936	0.293747	0.345458	0.364376	0.42118	0.495364	0.517277	0.638451	0.7487	0.770701	0.918056	1.01201	1.06159	1.09165	1.09718	1.05595	1.05196	1.03451	0.988469	0.878336	0.829615	0.723329
chr13:Cdk13		0.916088	0.916088	0.916088	0.916088	0.916088	0.916088	1.04876	0.88096	0.995642	1.25792	1.31746	1.34789	1.41496	1.44694	1.36572	1.35835	1.17584	1.08489	1.15545	1.11055	0.785313	0.371756	0.223782	-0.0330695	-0.268783	-0.336923	-0.358957	-0.367867	-0.466863	-0.421963	-0.356232	-0.257324	0.0456022	0.232347	0.293591	0.496346	0.672104	0.619893	0.670436	0.769321	0.879125	0.745643	0.635615	0.656379	0.550395	0.745596	0.770973	0.770935
chr9:Zfp280d		0.916039	0.916039	0.916039	0.916039	0.916039	0.916039	0.836888	0.735472	0.681675	0.637417	0.652668	0.511214	0.60453	0.717265	0.677503	0.683348	0.430725	0.538608	0.410706	0.255752	0.180034	-0.0395623	-0.131625	-0.371309	-0.543492	-0.684273	-0.855268	-0.902908	-1.04857	-0.918317	-0.732328	-0.614869	-0.592216	-0.417818	-0.127222	-0.0374028	0.134694	0.266208	0.446647	0.63341	0.679367	0.597215	0.497564	0.560875	0.36778	0.368991	0.414745	0.393006
chr12:Npas3		0.915474	0.915474	0.915474	0.915474	0.915474	0.915474	0.925272	0.969671	0.963501	1.01363	0.966195	0.958751	1.00743	1.04618	1.10264	1.10181	0.955514	0.847692	0.703806	0.624731	0.53893	0.384162	0.297504	0.238504	0.107145	-0.00228886	-0.0574467	9.27319e-05	0.12663	0.144676	0.237331	0.279817	0.431665	0.450142	0.537772	0.660896	0.759745	0.814147	0.80931	0.752996	0.805593	0.862022	0.966003	0.983647	1.0088	0.975013	0.96256	0.834823
chr9:Elovl5		0.91422	0.91422	0.91422	0.91422	0.91422	0.91422	0.903389	0.957531	1.03048	1.14551	1.08674	1.09451	1.06995	1.08047	1.12968	1.02633	1.0773	1.13761	1.02919	0.962946	0.904192	0.87566	0.965911	0.940251	0.963781	0.858282	0.777746	0.798675	0.778648	0.83748	0.907593	0.944987	0.980805	0.94135	0.893635	0.809	0.913995	1.01172	1.00435	0.913661	0.855586	0.767504	0.710012	0.714266	0.687282	0.751516	0.81619	0.775966
chr10:Utrn		0.912447	0.912447	0.912447	0.912447	0.912447	0.912447	0.972905	1.03147	1.09542	1.06781	1.05774	1.05086	1.1228	1.02803	1.10778	1.25663	1.42252	1.30432	1.24339	1.17882	1.13511	1.02764	0.861884	0.777182	0.855539	0.843857	0.809916	0.619747	0.620438	0.623388	0.563801	0.624303	0.577476	0.616595	0.619843	0.539013	0.469736	0.540116	0.585029	0.6501	0.574985	0.655958	0.677863	0.776266	0.707678	0.645501	0.691104	0.718215
chr4:Ggh		0.909521	0.909521	0.909521	0.909521	0.909521	0.909521	0.794958	0.808398	0.919291	1.00471	1.07314	1.07052	1.12242	1.22117	1.23419	1.22467	1.11942	1.24236	1.2519	1.19561	1.28944	1.31186	1.2157	1.17483	1.17085	1.16676	1.22056	1.21329	1.1907	1.16318	1.17945	1.1508	1.05487	1.03523	1.03964	1.11382	1.06258	1.02041	0.835462	0.777563	0.790101	0.692892	0.651011	0.647425	0.660361	0.448244	0.225408	0.164278
chr12:Clmn		0.908838	0.908838	0.908838	0.908838	0.908838	0.908838	0.84875	0.848353	0.832709	0.995185	1.08365	1.0682	1.16528	1.2414	1.12125	1.1721	1.03592	1.103	1.10756	1.28373	1.23838	1.14078	1.14898	1.09128	1.05847	0.987769	0.886979	0.932283	0.8371	0.595838	0.329603	0.319106	0.227222	0.214942	0.181606	0.120764	0.148205	0.215928	0.257008	0.268435	0.299445	0.334261	0.486081	0.484364	0.446542	0.435921	0.396558	0.244452
chr1:Mrps14		0.908592	0.908592	0.908592	0.908592	0.908592	0.908592	1.07006	1.03745	0.947944	0.797921	0.867457	0.7599	0.615192	0.560741	0.575433	0.520402	0.635632	0.660967	0.792016	0.863024	1.10501	1.07445	1.36623	1.41869	1.5	1.5	1.5	1.5	1.41054	1.10287	1.06791	0.685316	0.711937	0.461948	0.248526	0.0151879	0.0191168	-0.0894978	-0.168608	-0.112467	-0.129404	0.00303353	0.0519918	-0.022382	0.00926645	0.192715	0.360603	0.339286
chr4:Plpp3		0.907212	0.907212	0.907212	0.907212	0.907212	0.907212	0.900306	0.912826	0.881977	0.871258	0.884598	0.874294	0.874497	0.858289	0.878761	0.898383	0.904005	0.94062	0.963918	1.00063	0.964422	0.988555	0.999235	1.01667	1.01352	1.00017	0.992248	0.96639	0.963457	0.94537	0.915268	0.938664	0.890634	0.877421	0.843993	0.839234	0.807888	0.745385	0.707612	0.682082	0.64068	0.618716	0.592048	0.60149	0.612635	0.609662	0.618384	0.642957
chr10:Epb41l2		0.906836	0.906836	0.906836	0.906836	0.906836	0.906836	0.89825	0.918677	0.939201	0.965033	0.969198	0.929881	0.945424	0.954391	0.976526	0.962866	0.960798	0.974873	0.927841	0.917798	0.898724	0.886168	0.870242	0.872527	0.841135	0.821363	0.834434	0.846553	0.862742	0.877201	0.843433	0.869277	0.900699	0.928315	0.95234	0.980089	0.987231	0.967205	0.958156	0.955604	0.959028	0.973391	0.963512	0.971122	0.957986	0.939414	0.916828	0.915071
chr18:Lipg		0.905302	0.905302	0.905302	0.905302	0.905302	0.905302	0.973932	1.12816	1.03458	1.0091	1.04157	1.06728	1.01375	1.00099	0.994208	1.05352	0.979819	0.867103	0.736517	0.728847	0.697954	0.642635	0.605305	0.576527	0.49383	0.410674	0.433887	0.524506	0.573451	0.631196	0.668502	0.733259	0.782075	0.932139	0.986135	1.18771	1.14575	1.21285	1.08366	1.14032	1.08086	1.16388	1.15227	1.07103	0.994614	0.913079	0.823028	0.912849
chr5:Ankrd17		0.903083	0.903083	0.903083	0.903083	0.903083	0.903083	0.8403	0.915882	0.737836	0.794646	0.916567	0.893961	0.800093	1.05877	1.25049	1.24024	0.933266	1.04071	1.10951	0.908774	0.760818	0.497514	0.38423	0.188627	-0.0823549	-0.275851	-0.27506	-0.125336	-0.173512	-0.460821	-0.140055	0.0353428	0.128018	0.271823	0.435408	0.677488	0.640055	0.520916	0.749404	0.711082	0.940499	0.794296	0.662802	0.674097	0.746942	0.681204	0.59211	0.637285
chr2:Frzb		0.901688	0.901688	0.901688	0.901688	0.901688	0.901688	0.918064	0.921411	0.944729	0.930951	0.940473	0.959362	0.981909	0.963314	0.989423	0.995112	0.995647	1.0049	0.974167	0.948983	0.963999	0.958907	0.979983	0.974193	0.948422	0.952441	0.948234	0.962255	0.965834	1.01504	1.0204	0.955862	0.914361	0.908427	0.907285	0.93739	0.913029	0.87891	0.849888	0.825012	0.792511	0.800267	0.844833	0.884005	0.852393	0.843927	0.849177	0.880064
chr4:Espn		0.900702	0.900702	0.900702	0.900702	0.900702	0.900702	0.854898	0.803962	0.73739	0.688279	0.68247	0.740818	0.728913	0.773789	0.764916	0.768488	0.801786	0.878202	0.934209	1.01599	1.06433	1.1141	1.12472	1.17061	1.16364	1.23755	1.26461	1.2229	1.16594	1.1726	1.10746	1.03958	0.975801	0.93458	0.888536	0.821449	0.758658	0.712258	0.694559	0.697624	0.640678	0.626628	0.62771	0.651472	0.611235	0.581712	0.590993	0.597394
chr14:Fam213a		0.89967	0.89967	0.89967	0.89967	0.89967	0.89967	0.843188	0.92414	0.95646	0.883858	1.13734	1.18563	1.12007	1.08546	1.21813	1.13626	1.01232	1.16998	1.16567	1.28896	1.22769	1.10773	1.0611	1.01167	1.18765	1.12601	1.32916	1.289	1.15807	1.00079	0.839453	0.898584	0.78512	0.738885	0.757963	0.581421	0.61622	0.539847	0.498365	0.40628	0.348901	0.139886	0.0227139	-0.177917	-0.358434	-0.49228	-0.466338	-0.556664
chr4:Alad		0.898413	0.898413	0.898413	0.898413	0.898413	0.898413	0.901867	0.899003	0.685738	0.63341	0.509806	0.4863	0.337146	0.399317	0.309291	0.284913	0.305725	0.387752	0.451923	0.575571	0.684058	0.92172	1.12478	1.27573	1.2451	1.33828	1.43037	1.4769	1.42131	1.48948	1.44855	1.48415	1.32362	1.2474	1.19586	1.17435	1.14469	1.08419	0.949398	1.00437	0.928072	0.889577	0.802995	0.804153	0.794273	0.815311	0.817581	0.833896
chr18:Tmx3		0.897217	0.897217	0.897217	0.897217	0.897217	0.897217	0.958956	0.926216	0.899175	0.939735	1.07748	1.03384	1.0346	0.937382	1.03	1.08525	1.05685	1.10558	1.18281	1.20931	1.17471	1.06008	1.06384	0.927638	0.815752	0.921854	0.864441	0.789984	0.680053	0.632307	0.738535	0.742797	0.877786	1.05999	1.09882	1.06711	0.926526	0.988201	1.14304	1.11888	1.19806	1.12637	0.991199	0.824515	0.630406	0.786295	0.919773	0.974654
chr9:Oaf		0.896389	0.896389	0.896389	0.896389	0.896389	0.896389	0.86322	0.747797	0.748232	0.728272	0.698949	0.671787	0.713124	0.733233	0.756067	0.780787	0.776793	0.923635	0.994461	1.0236	1.05916	1.13879	1.22973	1.2402	1.29107	1.31482	1.31346	1.29864	1.13468	1.18889	1.11706	1.18979	1.14399	1.04649	1.01677	0.977612	0.961567	0.942867	0.958859	0.989469	0.896167	0.884735	0.780376	0.757927	0.789539	0.795032	0.729335	0.684657
chr7:Rab38		0.894429	0.894429	0.894429	0.894429	0.894429	0.894429	0.961441	0.87244	0.886959	0.874006	0.901504	1.01276	1.11389	1.07534	1.02648	0.977786	1.02928	1.0044	1.0774	1.11981	1.21542	1.19868	1.12562	1.07515	1.12402	1.23777	1.16864	1.12441	1.1315	1.10872	1.09415	1.04177	0.906936	0.869471	0.816998	0.731066	0.669657	0.687338	0.775587	0.710917	0.642423	0.58485	0.560768	0.669257	0.722656	0.712356	0.83671	0.75119
chr14:Dock5		0.891626	0.891626	0.891626	0.891626	0.891626	0.891626	0.981127	1.00528	1.11152	1.12408	1.22213	1.19815	1.25531	1.31066	1.31991	1.32193	1.31407	1.26783	1.30556	1.11617	1.07185	0.931303	0.845333	0.80731	0.652311	0.621643	0.606456	0.64992	0.71632	0.648765	0.735696	0.721699	0.766262	0.814342	0.842081	0.845086	0.728449	0.681238	0.605407	0.545917	0.542213	0.51717	0.566673	0.45513	0.523552	0.483474	0.457331	0.45133
chr5:Cit		0.89132	0.89132	0.89132	0.89132	0.89132	0.89132	0.91334	0.923435	0.874875	0.981567	1.02046	0.964735	1.04055	0.979964	0.901177	0.783838	0.476075	0.386371	0.41328	0.389028	0.324035	0.280645	0.319715	0.182125	0.126601	0.150552	0.0510358	0.159027	0.240279	0.289341	0.2931	0.300261	0.353981	0.472081	0.673845	0.777724	0.731685	0.822957	0.800647	0.723937	0.659456	0.653012	0.801598	0.829796	0.797981	0.648113	0.543561	0.438441
chr11:C030037D09Rik		0.891135	0.891135	0.891135	0.891135	0.891135	0.891135	0.903091	1.04683	1.07018	1.07604	1.09474	1.06046	1.03001	1.05013	1.03495	1.02005	0.991451	0.984915	0.891139	0.887873	0.873802	0.7437	0.800328	0.796817	0.831973	0.859492	0.805091	0.793633	0.759148	0.747837	0.746702	0.795078	0.892539	0.863605	0.842824	0.882757	0.923421	0.997375	0.986501	0.988838	1.00618	1.01886	0.952034	0.967487	0.99717	1.02722	1.01434	1.01914
chr11:Rtn4		0.88817	0.88817	0.88817	0.88817	0.88817	0.88817	0.871595	0.879982	0.85015	0.831469	0.822134	0.841754	0.856193	0.877409	0.885868	0.918206	0.947648	0.969003	0.9922	1.03084	1.08084	1.11443	1.11331	1.11407	1.09683	1.09951	1.0846	1.08654	1.08425	1.06178	1.04561	1.01612	0.99068	0.965779	0.94096	0.926223	0.886553	0.849289	0.821728	0.795187	0.755587	0.721101	0.686548	0.658375	0.63025	0.6081	0.597339	0.615191
chr3:Rrh		0.888041	0.888041	0.888041	0.888041	0.888041	0.888041	0.88588	0.830068	0.870205	0.892782	0.973236	0.982763	0.965282	1.01185	0.873562	0.8903	1.01489	0.968634	1.00174	1.00467	0.998378	0.967077	0.898765	0.917819	0.942768	0.984835	0.964613	0.886377	0.934685	0.901285	0.885201	0.909391	0.893704	0.949388	0.89339	0.811516	0.772893	0.76021	0.718346	0.707659	0.695002	0.697809	0.65258	0.522046	0.430092	0.410413	0.448616	0.452643
chr6:Chl1		0.887913	0.887913	0.887913	0.887913	0.887913	0.887913	0.941646	1.04529	1.01688	1.08783	1.08093	1.12435	1.18102	1.20143	1.21549	1.11939	1.06684	0.971482	0.801381	0.799198	0.737099	0.681236	0.56265	0.483501	0.371215	0.316973	0.322053	0.276525	0.302963	0.387768	0.404146	0.530788	0.591664	0.687796	0.772226	0.751726	0.728325	0.715933	0.730131	0.748982	0.759914	0.793074	0.734238	0.73862	0.673754	0.613143	0.666842	0.607833
chr11:Slc35e4		0.886816	0.886816	0.886816	0.886816	0.886816	0.886816	0.896651	0.877358	0.939269	0.842943	0.881014	0.992904	0.947363	0.926045	1.04961	1.12067	1.16341	1.14342	1.15905	1.1282	1.16977	1.23432	1.24437	1.26126	1.24559	1.12447	1.12769	1.13496	1.13149	1.13922	1.15987	1.13095	1.06648	0.924006	0.845352	0.857151	0.871137	0.822146	0.781058	0.728446	0.743101	0.687787	0.680039	0.699245	0.739574	0.746711	0.682734	0.65725
chr2:Hspa5		0.886752	0.886752	0.886752	0.886752	0.886752	0.886752	0.818356	0.721505	0.76754	0.766658	0.702399	0.73465	0.757653	0.746101	0.779861	0.773511	0.743508	0.745386	0.78536	0.801367	0.810105	0.826551	0.756947	0.686868	0.710734	0.768804	0.761335	0.806967	0.795807	0.840026	0.806675	0.904175	0.90097	1.00896	1.09582	1.15374	1.19597	1.27159	1.2647	1.35879	1.37661	1.38129	1.28763	1.35446	1.29732	1.21234	1.12606	0.996213
chr8:Asah1		0.883082	0.883082	0.883082	0.883082	0.883082	0.883082	0.903475	0.787634	0.842384	0.86404	0.943589	1.06972	1.04842	1.16332	1.25618	1.26465	1.20239	1.1891	1.25126	1.18644	1.08862	1.02082	0.999445	1.09244	1.01197	0.845427	0.891253	1.00195	1.00134	0.975072	0.960701	1.10638	1.12111	1.05194	1.10259	1.20388	1.22491	1.09653	0.8627	0.822223	0.855647	0.851772	0.779878	0.706882	0.767385	0.640098	0.548125	0.483589
chr4:Abca1		0.882609	0.882609	0.882609	0.882609	0.882609	0.882609	0.811722	0.764304	0.823601	0.782684	0.715313	0.67473	0.779621	0.668815	0.607349	0.662751	0.473478	0.36348	0.463212	0.254767	0.320603	0.309439	0.260121	0.178244	0.128986	0.0261025	0.130667	0.325916	0.386158	0.456995	0.743894	0.81547	0.913789	0.969417	1.04949	1.12631	1.38171	1.29853	1.26954	1.37641	1.39162	1.27999	1.22368	1.29685	1.3711	1.36464	1.3782	1.21241
chr2:Nckap1		0.881537	0.881537	0.881537	0.881537	0.881537	0.881537	0.863146	0.68175	0.840628	0.96956	0.961453	0.875413	0.942797	0.850102	0.8184	0.487943	0.590771	0.567753	0.761752	0.679195	0.405957	0.221685	0.20949	0.146804	0.136851	-0.0477339	0.0279406	-0.339111	-0.0841582	-0.0532494	0.157127	0.232887	0.307541	0.415015	0.394884	0.412305	0.778374	0.683943	0.869268	0.854178	0.568504	0.469767	0.213114	0.119519	-0.00854579	-0.145502	-0.150982	-0.416496
chr16:Pak2		0.881494	0.881494	0.881494	0.881494	0.881494	0.881494	0.837811	0.698207	0.839736	0.736032	0.856322	0.784257	1.04416	0.949375	0.749137	0.87961	0.637481	0.778651	0.877015	0.76966	0.707055	0.584783	0.62187	0.441889	0.289196	0.269067	0.0206682	0.0340848	-0.0624097	0.0015169	-0.0495413	0.115191	0.299373	0.167886	0.224414	0.253214	0.275385	0.308351	0.391508	0.453874	0.447756	0.519025	0.410497	0.0311346	0.139215	0.254566	0.422387	0.606726
chr19:Fads2		0.880326	0.880326	0.880326	0.880326	0.880326	0.880326	0.953025	0.977817	0.920761	0.963019	0.988909	1.20558	1.198	1.22655	1.27998	1.28484	1.05288	0.9146	0.865191	0.833639	0.700863	0.712197	0.52145	0.492234	0.52582	0.480911	0.622252	0.642204	0.696546	0.726763	0.857912	0.867781	0.931089	1.05605	1.07111	1.06512	1.07357	0.993754	1.17658	1.11473	1.11712	0.998376	1.06021	1.10436	1.08005	1.01425	0.967862	0.981141
chr4:Gpr153		0.879265	0.879265	0.879265	0.879265	0.879265	0.879265	0.820177	0.771149	0.788896	0.86458	0.860538	0.861846	0.86918	0.815008	0.829763	0.810545	0.799372	0.803304	0.942987	0.91477	0.934255	0.959815	1.05534	1.02028	1.02594	1.04688	1.07527	1.15635	1.17891	1.08155	1.12491	1.07067	1.03683	0.983023	1.0036	1.00851	0.981814	0.977828	0.864159	0.873084	0.899591	0.88144	0.894061	0.927736	0.96201	0.926109	0.901206	0.87928
chr4:Nfia		0.878866	0.878866	0.878866	0.878866	0.878866	0.878866	1.0079	1.00769	1.01558	1.12592	1.08519	1.02649	0.975515	0.8904	0.926775	0.803917	0.78369	0.651223	0.456537	0.276546	0.0293893	-0.132297	-0.18614	-0.290346	-0.381196	-0.532631	-0.545635	-0.517565	-0.530938	-0.426378	-0.352039	-0.270302	-0.087614	-0.0351707	0.0368422	0.160222	0.193398	0.38607	0.251929	0.344036	0.397852	0.423693	0.534148	0.560229	0.567694	0.672709	0.765481	0.876943
chr1:Creg2		0.878377	0.878377	0.878377	0.878377	0.878377	0.878377	0.7789	0.743952	0.70657	0.655471	0.608149	0.683075	0.6604	0.663314	0.681912	0.679602	0.662886	0.690522	0.807227	0.865009	0.854381	0.895946	0.918755	0.955398	0.999137	1.04161	1.09857	1.15384	1.1608	1.08661	1.05717	1.09874	1.07565	1.08224	1.03847	1.05186	0.94685	0.882361	0.838727	0.855425	0.838031	0.850958	0.828682	0.829427	0.813955	0.867975	0.845132	0.94654
chr3:Plppr4		0.874751	0.874751	0.874751	0.874751	0.874751	0.874751	0.891686	0.898853	0.922622	0.959529	0.94871	0.962723	0.99754	0.946385	0.980969	1.00914	1.05576	1.06164	1.10785	1.10206	1.08867	1.14181	1.16019	1.10965	1.12672	1.15074	1.13235	1.13303	1.11985	1.13234	1.10977	1.09906	1.03853	1.00266	0.950444	0.917057	0.881171	0.846513	0.788922	0.774061	0.721031	0.702586	0.697146	0.717257	0.719933	0.753943	0.779854	0.791686
chr8:Mfap3l		0.873754	0.873754	0.873754	0.873754	0.873754	0.873754	0.885112	0.872162	0.850974	0.859768	0.868019	0.841519	0.862637	0.864027	0.871915	0.915757	0.896609	0.910698	0.919252	0.938356	0.912929	0.923616	0.939396	0.929538	0.908619	0.92583	0.884893	0.893995	0.900288	0.92657	0.899583	0.924579	0.94105	0.955307	0.944969	0.993153	1.00407	1.01392	0.992032	0.973531	0.935747	0.947093	0.918232	0.886302	0.871882	0.876955	0.875614	0.872829
chr3:Pkn2		0.873713	0.873713	0.873713	0.873713	0.873713	0.873713	0.925382	0.900145	1.04665	1.32622	1.44914	1.35092	1.40878	1.4291	1.4397	1.5	1.43745	1.31426	1.41808	1.2999	0.953475	0.801776	0.67104	0.55763	0.402011	0.372718	0.215149	0.14901	0.182461	0.18373	0.276267	0.507619	0.497911	0.637643	0.615864	0.820437	0.852037	0.888193	1.0325	1.14007	0.983956	0.881174	0.70451	0.67981	0.789748	0.834601	0.703657	0.705435
chr14:Klf12		0.872729	0.872729	0.872729	0.872729	0.872729	0.872729	0.81372	0.8296	0.93526	0.993651	0.897467	0.913486	1.02926	0.87259	0.901116	0.84084	0.769473	0.74437	0.794841	0.599705	0.438574	0.429536	0.290016	0.142891	0.153206	0.13645	0.15363	0.134992	0.27215	0.267639	0.321299	0.350252	0.414829	0.551633	0.621168	0.700207	0.74858	0.869579	0.885401	0.799804	0.76873	0.825613	0.954635	0.885347	0.842994	0.890785	0.914412	0.962754
chr6:Fam3c		0.872183	0.872183	0.872183	0.872183	0.872183	0.872183	0.850499	0.812543	0.779211	0.962785	1.0664	1.08727	1.06941	1.11634	1.19149	1.31601	1.37919	1.5	1.5	1.5	1.5	1.5	1.38684	1.39976	1.34683	1.2668	1.10693	1.02442	0.836348	0.684897	0.757761	0.597815	0.503208	0.525661	0.439352	0.479396	0.508776	0.554657	0.608895	0.637685	0.591926	0.516897	0.590158	0.606521	0.702648	0.725585	0.691105	0.679996
chr17:Birc6		0.871306	0.871306	0.871306	0.871306	0.871306	0.871306	0.811364	0.900421	0.965414	0.845891	0.884372	1.05979	0.992115	0.809597	0.735796	0.551195	0.506308	0.443122	0.246361	0.170567	0.0303769	-0.306654	-0.441325	-0.537572	-0.585124	-0.763362	-0.916485	-0.965228	-0.977018	-1.04598	-0.994867	-0.875507	-0.511393	-0.333457	-0.17141	-0.157284	-0.18037	0.0376996	0.163542	0.42292	0.719328	0.564296	0.703407	0.569306	0.532577	0.546806	0.641118	0.675878
chr9:Sept7		0.870948	0.870948	0.870948	0.870948	0.870948	0.870948	0.52213	0.67092	0.689906	0.565819	0.730943	0.64102	0.81872	0.63699	0.382289	0.0934047	0.140277	0.286607	0.239594	0.342618	0.396608	0.122066	-0.0212032	-0.151557	-0.140182	-0.110863	-0.11427	-0.502768	-0.43261	-0.624604	-0.482242	-0.608289	-0.461315	-0.392208	-0.475481	-0.584802	-0.697434	-0.727861	-0.373121	-0.492529	-0.586197	-0.478155	-0.577643	-0.608408	-0.503437	-0.120173	0.166065	0.53946
chr4:Fam219a		0.870708	0.870708	0.870708	0.870708	0.870708	0.870708	0.893441	1.08786	1.14602	1.26365	1.34707	1.35864	1.3214	1.26854	1.27628	1.30085	1.05363	1.1161	0.945156	0.79504	0.55214	0.630546	0.676372	0.662541	0.552067	0.533426	0.564281	0.657623	0.777647	0.87132	0.911275	1.03158	0.946135	0.904977	1.04023	1.06358	1.04807	1.00071	0.988795	0.96111	0.887314	0.872218	0.902551	0.904278	0.897885	0.758331	0.820418	0.876824
chr2:Cox4i2		0.869923	0.869923	0.869923	0.869923	0.869923	0.869923	0.859483	0.862009	0.799077	0.721157	0.729181	0.705813	0.702057	0.713425	0.674831	0.751603	0.796044	0.845305	0.919945	1.01487	1.18453	1.20096	1.24713	1.3044	1.33293	1.41116	1.40613	1.36166	1.34959	1.32433	1.30308	1.18175	1.11863	1.08885	1.00989	0.972489	0.880142	0.813652	0.799319	0.72595	0.628979	0.612123	0.580167	0.617256	0.622717	0.632262	0.616596	0.647495
chr7:Gm2115		0.867497	0.867497	0.867497	0.867497	0.867497	0.867497	0.923346	0.881083	0.89905	0.988912	1.01633	0.982807	1.11209	1.09809	1.08576	1.09661	1.06188	0.973785	0.97359	0.886427	0.787059	0.693172	0.653924	0.506016	0.509712	0.480869	0.416294	0.398708	0.443079	0.414895	0.426452	0.476435	0.546155	0.634604	0.703087	0.69363	0.787875	0.867711	0.939714	0.928622	1.05551	1.16617	1.18212	1.18855	1.22816	1.27135	1.2892	1.28399
chr6:Pon2		0.866988	0.866988	0.866988	0.866988	0.866988	0.866988	0.836827	0.809869	0.827325	0.824527	0.911077	0.850666	0.90811	0.980444	0.969742	1.02957	1.082	1.11253	1.17513	1.13951	1.15346	1.14892	1.17459	1.19437	1.12951	1.19575	1.14781	1.12608	1.10125	1.05504	1.08764	1.02655	0.915713	0.891558	0.817018	0.801203	0.753771	0.78412	0.68504	0.662727	0.613433	0.57666	0.565979	0.584467	0.558002	0.525889	0.5116	0.442889
chr12:Ahr		0.866802	0.866802	0.866802	0.866802	0.866802	0.866802	0.815374	0.884472	1.00699	1.09181	1.16563	1.37259	1.36454	1.42063	1.45077	1.44528	1.38763	1.36359	1.35791	1.24357	1.17298	1.16787	0.927749	0.911568	0.866344	0.734535	0.705081	0.601168	0.595318	0.530829	0.580029	0.576827	0.563094	0.624304	0.58593	0.68073	0.700956	0.678171	0.726056	0.6301	0.680284	0.621339	0.661675	0.754759	0.749254	0.713124	0.543136	0.576509
chr10:Chpt1		0.865329	0.865329	0.865329	0.865329	0.865329	0.865329	0.854113	0.814332	0.871861	0.836858	0.910848	0.779204	0.972679	0.701924	0.880916	1.04195	1.04453	1.12446	1.08409	1.08307	1.07054	1.02197	1.08256	1.03288	1.0202	0.847653	0.755031	0.600707	0.541201	0.499226	0.435648	0.516254	0.540544	0.554952	0.520091	0.540179	0.546229	0.514828	0.657053	0.53811	0.429445	0.470918	0.510665	0.542307	0.513358	0.601841	0.703029	0.639236
chr11:Sdf2		0.863707	0.863707	0.863707	0.863707	0.863707	0.863707	0.851044	0.86875	0.910245	0.814898	0.961328	0.999753	0.99265	1.06512	1.1092	1.1646	1.23844	1.32075	1.30699	1.3194	1.41721	1.36738	1.39388	1.5	1.40545	1.5	1.41488	1.31004	1.22276	1.23195	1.30221	1.29098	1.1245	0.961697	0.779603	0.826677	0.656305	0.826175	0.734978	0.661328	0.490754	0.320981	0.245691	0.218761	0.172013	0.136408	-0.012319	-0.159734
chr2:Cstf3		0.85992	0.85992	0.85992	0.85992	0.85992	0.85992	0.954661	0.916514	1.03666	1.23689	1.27197	1.131	1.24676	1.11579	1.14289	1.04394	0.822045	0.688665	0.596496	0.431049	0.191131	-0.146224	-0.261607	-0.334256	-0.298925	-0.228262	-0.304553	-0.279712	-0.271951	-0.187712	-0.0185768	-0.0293936	0.234592	0.392032	0.4047	0.530412	0.675103	0.799161	0.690667	0.849975	0.961411	0.973085	1.09882	1.06687	1.07954	1.20305	1.06114	0.880076
chr8:Il15		0.85755	0.85755	0.85755	0.85755	0.85755	0.85755	0.864106	0.87922	1.05922	1.088	1.10758	1.01473	1.03229	1.02924	0.965675	0.887167	0.808608	0.746197	0.614791	0.391642	0.251821	0.130677	0.0894834	0.104795	0.127383	0.0760903	0.0759954	0.119427	0.126357	0.143202	0.259504	0.265947	0.338704	0.232612	0.175319	0.179479	0.148291	0.26956	0.138617	0.18339	0.0958132	0.0210796	-0.0928947	-0.0718515	0.209602	0.235622	0.19236	0.227196
chr10:Ppfia2		0.855752	0.855752	0.855752	0.855752	0.855752	0.855752	0.834705	0.826586	0.76632	0.696237	0.693037	0.712013	0.686518	0.73253	0.639023	0.729161	0.659215	0.736375	0.77409	0.824	0.898496	0.901222	0.919712	0.875136	0.866783	0.962895	1.02136	1.08963	0.980434	0.93347	0.887294	0.807058	0.706066	0.659554	0.674601	0.705355	0.666475	0.503442	0.553609	0.542572	0.600551	0.547373	0.570478	0.613922	0.642673	0.600855	0.567102	0.586182
chr13:Hist1h4i		0.853772	0.853772	0.853772	0.853772	0.853772	0.853772	0.80633	0.775654	0.790661	0.737897	0.713142	0.661288	0.640544	0.678667	0.728235	0.741711	0.690518	0.776446	0.828564	0.877611	0.918757	0.998595	0.998073	1.0574	1.06861	0.987014	0.952747	0.989119	0.975559	0.987457	0.931331	0.953557	0.90178	0.913737	0.849686	0.880298	0.942911	0.962638	0.976833	0.952706	0.942361	0.983294	1.06216	1.12088	1.2225	1.22313	1.2434	1.20434
chr6:Cntnap2		0.850638	0.850638	0.850638	0.850638	0.850638	0.850638	0.809905	0.895435	0.872025	0.757688	0.664288	0.688681	0.768178	0.731831	0.819506	0.813271	0.800461	0.858045	0.782471	0.766521	0.663461	0.679643	0.561515	0.361574	0.187015	0.269209	0.279188	0.274951	0.282456	0.138785	0.11118	0.312149	0.241774	0.386584	0.431914	0.515208	0.393741	0.415139	0.328032	0.228404	0.353548	0.384657	0.35796	0.364865	0.375586	0.537691	0.640987	0.88355
chr4:Chchd7		0.849965	0.849965	0.849965	0.849965	0.849965	0.849965	0.960529	0.921505	0.991316	1.05893	1.03234	1.13205	1.09297	1.26263	1.11559	1.07037	1.11547	1.0234	1.01379	1.03418	0.959936	0.984677	0.830019	0.94094	0.850799	1.04685	1.0147	0.867298	0.665207	0.713574	0.586717	0.491042	0.439233	0.48452	0.386225	0.486149	0.461679	0.450083	0.413716	0.666502	0.662826	0.744948	0.865848	0.855005	0.868256	0.921363	0.673023	0.590264
chr15:Ano6		0.849654	0.849654	0.849654	0.849654	0.849654	0.849654	0.833245	0.813658	0.884202	0.987341	1.18903	1.11643	0.998226	1.14423	1.06864	1.09113	1.11355	1.07922	0.928781	0.729156	0.631066	0.378365	0.35078	0.366215	0.357586	0.255676	0.142793	0.223654	0.267429	0.501283	0.63848	0.558168	0.633189	0.731214	0.762406	0.779178	0.996936	1.14219	1.07796	1.1356	1.12375	1.17079	1.30858	1.28299	1.26134	1.24676	1.12951	1.04103
chr4:Ssbp3		0.848636	0.848636	0.848636	0.848636	0.848636	0.848636	0.673352	0.502755	0.392309	0.23599	0.287154	0.22023	0.230238	0.154184	0.00636109	0.0344006	0.212752	0.320232	0.225459	0.251347	0.272253	0.204043	0.0983777	0.234565	0.206382	0.325259	0.358035	0.219576	0.343624	0.418361	0.508274	0.500089	0.567284	0.808044	0.72352	0.790089	0.841224	0.732354	0.604241	0.431213	0.364522	0.306109	0.365726	0.327699	0.226136	0.0955157	0.266484	0.447126
chr9:Trpc1		0.848122	0.848122	0.848122	0.848122	0.848122	0.848122	1.12481	0.98129	1.1678	1.09896	1.06435	0.974331	0.731169	0.810584	0.824291	0.729242	0.892689	0.725075	0.80323	0.537442	0.725531	0.666319	0.70014	0.74615	0.646934	0.800055	0.878688	0.790156	0.911402	0.814347	0.948149	0.903856	0.839621	0.868827	1.034	1.04266	0.788484	0.779207	0.646965	0.468445	0.443632	0.395233	0.407941	0.553955	0.455546	0.264633	0.224263	0.386614
chr13:Ctsl		0.84732	0.84732	0.84732	0.84732	0.84732	0.84732	0.871725	0.856893	0.952016	0.864048	0.822915	0.806772	0.80125	0.885896	0.882049	0.827641	0.80357	0.854191	0.890202	0.836269	0.929487	0.966449	1.06337	1.08173	1.069	1.08581	1.09979	1.08074	1.03022	1.01888	1.01447	1.01102	0.981037	0.907584	0.901851	0.949095	0.955428	0.915707	0.917057	0.929027	0.895188	0.895375	0.782522	0.736236	0.668366	0.601147	0.426647	0.285389
chr13:Fam169a		0.846917	0.846917	0.846917	0.846917	0.846917	0.846917	0.874239	0.86934	0.904606	0.922947	0.922226	0.930341	0.927123	0.951643	0.97842	0.959579	0.910531	0.897622	0.856192	0.839777	0.840657	0.885331	0.857914	0.815126	0.769786	0.766492	0.780083	0.776733	0.752678	0.743958	0.731887	0.694287	0.677149	0.675738	0.723242	0.751523	0.731909	0.720015	0.712585	0.793083	0.865977	0.914336	0.913127	0.929819	0.942527	0.923261	0.969109	0.9793
chr6:Tril		0.846768	0.846768	0.846768	0.846768	0.846768	0.846768	0.87114	0.782703	0.778817	0.916373	0.99741	1.01317	1.00333	1.07582	0.993827	0.923938	0.908164	1.0173	1.00733	1.01259	0.930026	0.967727	0.876589	0.872711	0.798833	0.848119	0.820416	0.79507	0.666632	0.62783	0.517757	0.55282	0.562913	0.580937	0.518032	0.462127	0.384224	0.465463	0.459202	0.51518	0.572818	0.69068	0.571115	0.574204	0.68852	0.706908	0.846699	0.982941
chr3:Negr1		0.844798	0.844798	0.844798	0.844798	0.844798	0.844798	0.807315	0.833823	0.850824	0.831931	0.857807	0.917545	0.896022	0.910817	0.922654	0.926175	0.902535	0.868383	0.815595	0.713374	0.624445	0.50094	0.406879	0.366142	0.274442	0.215735	0.159473	0.133661	0.207677	0.256529	0.393716	0.423078	0.546618	0.649518	0.696425	0.790595	0.89505	0.964254	1.02756	1.03917	1.11123	1.1287	1.231	1.31977	1.41181	1.46223	1.44363	1.34968
chr13:Inhba		0.843458	0.843458	0.843458	0.843458	0.843458	0.843458	0.884513	0.792659	0.940582	0.943057	0.937495	0.965571	0.946818	0.954298	1.12895	1.23348	1.13595	1.17124	1.11758	0.977082	0.873176	0.83531	0.787021	0.643061	0.683454	0.598954	0.489947	0.461615	0.61106	0.681962	0.676225	0.71781	0.686498	0.569086	0.669452	0.807137	0.878875	0.997405	0.988655	1.01584	1.01209	1.16041	1.18221	1.16007	1.26225	1.30016	1.218	1.19806
chr14:Ktn1		0.843377	0.843377	0.843377	0.843377	0.843377	0.843377	0.825369	0.826182	0.795384	0.765765	0.739302	0.76037	0.803048	0.805181	0.815207	0.827069	0.85595	0.879655	0.945085	0.98256	1.01886	1.04664	1.03762	1.05327	1.07455	1.09872	1.12964	1.11737	1.10931	1.07213	1.08516	1.12358	1.15553	1.16813	1.12053	1.06942	1.02209	0.995699	0.992474	0.994469	0.964901	0.93039	0.895108	0.822161	0.770393	0.782906	0.766399	0.810818
chr2:Zeb2		0.843142	0.843142	0.843142	0.843142	0.843142	0.843142	0.809992	0.779366	0.819187	0.852423	0.828049	0.747898	0.852157	0.929626	1.00865	0.959397	0.954688	0.897798	0.953712	0.906112	0.931508	0.863015	0.866682	0.819111	0.760567	0.706069	0.743496	0.716326	0.703451	0.618469	0.602598	0.531187	0.643029	0.590479	0.537695	0.500136	0.524298	0.54124	0.604886	0.589565	0.616494	0.569301	0.600149	0.515053	0.632265	0.666387	0.698674	0.702239
chr16:Cd47		0.842751	0.842751	0.842751	0.842751	0.842751	0.842751	0.875827	0.863827	0.899114	0.87661	0.901966	0.94873	1.02636	1.07211	1.10476	1.22382	1.20123	1.17405	1.2547	1.20256	1.14802	1.13385	1.08951	1.05478	1.01244	0.967064	0.855623	0.814486	0.822203	0.769945	0.790796	0.828793	0.802338	0.823626	0.780955	0.770852	0.767083	0.745645	0.838022	0.795434	0.769168	0.716782	0.719253	0.730654	0.781248	0.785279	0.776954	0.791676
chr16:Fam162a		0.842527	0.842527	0.842527	0.842527	0.842527	0.842527	1.00487	1.13543	1.0205	0.915542	0.944391	0.95355	0.883066	0.849937	0.790943	0.922117	0.871376	0.840626	0.740876	0.871963	0.983718	1.0732	1.13326	1.09686	1.06701	0.996061	0.998199	1.00713	0.915191	0.90462	0.568867	0.288712	-0.0832118	-0.200511	-0.298573	-0.386057	-0.388096	-0.453458	-0.638444	-0.812445	-0.867949	-0.772778	-0.697971	-0.574767	-0.571801	-0.489702	-0.403538	-0.247589
chr3:Qrfpr		0.840289	0.840289	0.840289	0.840289	0.840289	0.840289	0.899522	0.919607	0.949876	0.97972	1.01769	1.07918	1.11512	1.0946	1.05767	1.03535	0.93664	0.870919	0.812809	0.750996	0.738335	0.656474	0.584042	0.552626	0.486536	0.450547	0.443183	0.466265	0.449033	0.424796	0.48114	0.474563	0.523448	0.570829	0.631432	0.787264	0.822503	0.879266	0.942029	1.0205	1.0903	1.0729	1.14453	1.11308	1.15477	1.07829	0.91672	0.852739
chr13:Prpf4b		0.837974	0.837974	0.837974	0.837974	0.837974	0.837974	0.821056	0.849562	0.830363	0.796299	0.955988	0.927691	0.934092	0.860306	0.973936	0.945564	0.943748	1.06824	1.01818	0.889197	0.966682	0.799947	0.661485	0.626011	0.573928	0.346626	0.268004	0.321421	0.153627	0.0736651	0.198601	0.257638	0.34898	0.55362	0.591723	0.705793	0.809522	0.876647	0.933092	1.04854	1.08809	1.14833	1.09923	1.02292	0.966544	0.938515	0.876652	0.880871
chr12:Dhrs7		0.837601	0.837601	0.837601	0.837601	0.837601	0.837601	0.846523	0.761998	0.755758	0.767859	0.738239	0.735191	0.764009	0.703167	0.68738	0.680727	0.723154	0.859293	1.04391	1.05962	1.06378	1.02315	1.19554	1.16422	1.23904	1.32619	1.43099	1.48068	1.43002	1.27771	1.2232	1.18676	1.14572	0.946397	0.819744	0.945945	0.903335	0.769148	0.613761	0.646519	0.663153	0.713004	0.661512	0.666929	0.566835	0.60134	0.390698	0.327065
chr16:Acap2		0.83692	0.83692	0.83692	0.83692	0.83692	0.83692	0.892606	1.00122	1.18763	1.17718	1.30934	1.24615	1.32318	1.36857	1.29626	1.18598	1.12783	1.08635	0.954973	0.881159	0.807721	0.67173	0.637044	0.543062	0.455536	0.337391	0.357375	0.360583	0.411004	0.528025	0.58151	0.689346	0.747844	0.865788	0.981583	1.1397	1.17361	1.20329	1.12415	1.20649	1.1898	1.14859	1.11429	1.19369	1.06743	0.958568	0.798822	0.837177
chr2:Frmd4a		0.83544	0.83544	0.83544	0.83544	0.83544	0.83544	0.87093	0.851694	0.78272	0.789482	0.782373	0.807594	0.815697	0.852225	0.798939	0.769092	0.769469	0.741851	0.692543	0.649133	0.645146	0.533929	0.513877	0.49793	0.374442	0.364776	0.398694	0.381986	0.359713	0.351676	0.424429	0.362829	0.352502	0.380705	0.436386	0.478362	0.49826	0.508164	0.527415	0.539121	0.593826	0.512168	0.621878	0.685116	0.652387	0.651933	0.617966	0.647529
chr15:Mtdh		0.833077	0.833077	0.833077	0.833077	0.833077	0.833077	0.98464	1.14735	1.33093	1.4236	1.5	1.5	1.5	1.5	1.5	1.5	1.5	1.37865	1.07308	0.781348	0.739576	0.474405	0.141488	0.0141157	-0.424561	-0.307671	-0.238655	-0.222132	-0.207247	-0.328263	-0.217967	-0.233015	-0.243547	-0.0178494	0.142823	0.182743	0.206978	0.283759	0.298269	0.295279	0.382596	0.201514	0.150316	0.277738	0.199406	-0.0323179	-0.0240908	-0.0704433
chr4:Tmem50a		0.831886	0.831886	0.831886	0.831886	0.831886	0.831886	0.889222	0.919514	0.913921	0.715493	0.754582	0.674494	0.676525	0.807249	0.841376	0.795879	0.952337	0.953469	1.11967	1.30579	1.5	1.5	1.5	1.5	1.36942	1.28268	1.29754	1.3232	1.30764	1.16212	0.927704	0.666368	0.568054	0.469171	0.232877	0.380606	0.446392	0.399673	0.35042	0.243951	0.0675669	-0.0233879	-0.0281465	-0.100912	-0.191542	-0.212316	-0.366364	-0.49865
chr9:Mras		0.831863	0.831863	0.831863	0.831863	0.831863	0.831863	1.03478	0.816032	0.820925	0.6997	0.660256	0.511153	0.46313	0.459863	0.723063	0.635612	0.75069	0.62765	0.765727	0.808291	0.767024	0.886064	1.07039	1.02207	1.01296	1.01543	0.969122	0.8116	0.732184	0.864019	0.759035	0.867311	0.627379	0.511471	0.294194	0.248074	0.0350205	-0.0586905	0.0236543	-0.0802585	-0.104566	-0.16396	-0.127871	0.0684238	0.276808	0.394654	0.304388	0.365778
chr15:Kcnq3		0.831668	0.831668	0.831668	0.831668	0.831668	0.831668	0.829339	0.869441	0.984607	1.04743	1.17414	1.22904	1.28004	1.21779	1.14185	1.17902	1.0896	1.05054	0.960138	0.776645	0.559831	0.388652	0.291215	0.16815	0.0736391	-0.0393316	-0.211823	-0.309784	-0.274723	-0.209372	0.00323685	0.22235	0.354628	0.467167	0.557886	0.586178	0.721691	0.940632	1.17016	1.23881	1.29833	1.31677	1.2725	1.28428	1.18502	1.29419	1.39435	1.28253
chr7:Arl6ip1		0.828909	0.828909	0.828909	0.828909	0.828909	0.828909	0.692655	0.697447	0.713744	0.612864	0.630048	0.649218	0.598451	0.707989	0.787451	0.838796	0.864214	1.11478	1.15721	1.19636	1.15301	1.1175	1.05294	1.06694	1.07747	0.970445	0.951945	0.836212	0.653088	0.603601	0.624513	0.683382	0.705122	0.833953	0.973756	0.980458	1.03972	0.969107	0.969936	1.12729	1.04605	1.12931	1.11339	0.993331	0.967794	0.858854	0.669693	0.637182
chr9:Ncam1		0.827807	0.827807	0.827807	0.827807	0.827807	0.827807	0.817452	0.795345	0.801919	0.802014	0.797661	0.802584	0.811837	0.859434	0.835563	0.825125	0.85218	0.873963	0.898974	0.898345	0.901543	0.88459	0.867698	0.860072	0.829311	0.851935	0.844269	0.83189	0.834084	0.823345	0.81672	0.844147	0.835847	0.842356	0.83089	0.817868	0.814893	0.844259	0.859904	0.860634	0.864386	0.807354	0.756786	0.779051	0.783555	0.769971	0.765699	0.752722
chr3:Camk2d		0.824654	0.824654	0.824654	0.824654	0.824654	0.824654	0.820485	0.798036	0.853211	0.932083	0.908135	0.904463	0.898302	0.946965	0.994176	1.00228	0.997013	1.02723	1.01795	0.856545	0.77466	0.724301	0.749989	0.72866	0.61712	0.580439	0.58482	0.632635	0.690971	0.751422	0.885233	0.972838	0.93283	0.894499	0.885154	1.00234	0.984767	1.01395	1.1014	1.0923	1.11561	1.1233	1.03267	1.07609	1.12874	1.18291	1.16393	1.19289
chrX:Pak3		0.823165	0.823165	0.823165	0.823165	0.823165	0.823165	0.82103	0.846621	0.86723	0.873715	0.884633	0.889025	0.897524	0.854903	0.938555	0.983194	0.979425	1.05089	0.992068	0.984594	0.969888	0.846314	0.801827	0.74166	0.713461	0.62924	0.540109	0.448791	0.395846	0.43678	0.454566	0.498104	0.621085	0.669387	0.759275	0.807127	0.808116	0.846224	0.934532	0.934738	0.866016	0.877732	0.890292	0.842844	0.824719	0.805802	0.757314	0.761418
chr6:Ptn		0.822122	0.822122	0.822122	0.822122	0.822122	0.822122	0.839419	0.860041	0.854895	0.835267	0.832075	0.845439	0.858024	0.884707	0.906149	0.925289	0.972447	1.01037	1.03874	1.08109	1.10471	1.16083	1.20614	1.2132	1.22355	1.23563	1.24183	1.21359	1.18227	1.15279	1.13611	1.12304	1.08466	1.0342	1.03287	1.00467	0.961787	0.956568	0.937594	0.938038	0.912213	0.857766	0.816691	0.792314	0.757679	0.708172	0.703572	0.722225
chr17:Vegfa		0.821056	0.821056	0.821056	0.821056	0.821056	0.821056	0.887821	0.821386	0.839949	0.917627	0.983764	1.13323	1.18851	1.25294	1.19735	1.12093	1.06969	0.907601	0.886692	0.848506	0.707142	0.565951	0.446122	0.370481	0.243754	0.292015	0.288425	0.257471	0.399765	0.355054	0.406917	0.530768	0.59995	0.786303	0.908314	1.08863	1.07726	1.20578	1.29988	1.2989	1.33189	1.3526	1.5	1.5	1.44133	1.41393	1.31512	1.30125
chr15:Aqp5		0.819605	0.819605	0.819605	0.819605	0.819605	0.819605	0.771615	0.745631	0.771776	0.718935	0.773344	0.70356	0.685095	0.80808	0.79165	0.81357	0.894142	1.02997	1.05273	1.05793	1.23907	1.27598	1.42892	1.5	1.48246	1.5	1.5	1.5	1.47844	1.5	1.47361	1.27944	1.19118	1.08797	1.07551	0.948983	0.88103	0.788578	0.697623	0.688918	0.589905	0.538684	0.582992	0.566671	0.500965	0.344871	0.367632	0.330896
chr14:Rnase4		0.819141	0.819141	0.819141	0.819141	0.819141	0.819141	0.823795	0.875238	0.850084	0.792635	0.766225	0.792597	0.782671	0.865151	0.954808	1.01866	1.00789	1.01036	0.935513	1.06762	1.14018	1.241	1.2941	1.35371	1.36664	1.33313	1.29237	1.32697	1.34243	1.35264	1.27965	1.25504	1.17082	1.01827	0.915108	0.832704	0.818977	0.731712	0.698796	0.625056	0.582293	0.531622	0.466378	0.453109	0.441287	0.53914	0.535581	0.564541
chr16:Cbr3		0.817634	0.817634	0.817634	0.817634	0.817634	0.817634	0.789809	0.844001	0.915205	0.875668	0.82969	0.826402	0.852385	0.836677	0.905706	0.91254	0.919701	0.967274	1.04461	1.10389	1.26407	1.26915	1.32394	1.3766	1.31892	1.31912	1.37557	1.3066	1.26302	1.1356	1.06124	0.910484	0.870556	0.758221	0.739962	0.759997	0.759766	0.770711	0.858171	0.881866	0.917445	0.886047	0.919217	0.960395	0.933781	0.857447	0.848987	0.761143
chr2:Mdk		0.817571	0.817571	0.817571	0.817571	0.817571	0.817571	0.809594	0.747057	0.768181	0.80665	0.934374	0.953885	0.838156	0.775005	0.648493	0.714702	0.792099	0.938325	1.10756	1.15441	1.24388	1.18503	1.29964	1.35746	1.39309	1.5	1.5	1.47206	1.38032	1.31103	1.23709	1.13743	1.02537	0.97743	0.934026	0.867285	0.713846	0.679483	0.609461	0.650531	0.44997	0.448073	0.466538	0.489614	0.462028	0.454807	0.509698	0.523025
chr17:Prkd3		0.81746	0.81746	0.81746	0.81746	0.81746	0.81746	0.855148	0.877784	0.930646	0.959687	0.962423	0.975088	1.1328	1.10479	1.23895	1.31918	1.12828	1.04202	0.980678	0.863182	0.792947	0.851679	0.727218	0.69217	0.621138	0.490244	0.35721	0.383794	0.383808	0.356213	0.29929	0.282285	0.237057	0.377058	0.468746	0.643759	0.663825	0.772836	0.740276	0.824625	1.01877	1.25332	1.41745	1.40265	1.36936	1.38426	1.1881	1.1633
chr12:Rbm25		0.815339	0.815339	0.815339	0.815339	0.815339	0.815339	0.760829	0.742381	0.617518	0.65026	0.671455	0.701637	0.674436	0.759036	0.720672	0.578237	0.375028	0.101421	-0.056078	-0.109534	-0.308072	-0.503696	-0.739633	-0.875689	-1.09343	-1.18679	-1.29448	-1.123	-0.912148	-1.06566	-1.11634	-0.839965	-0.643173	-0.448158	-0.433028	-0.192966	-0.0991157	-0.0900263	-0.0619933	-0.185288	0.0410079	0.0920291	0.0315789	0.0575217	0.000807195	-0.0553651	-0.181915	-0.257507
chr1:Colgalt2		0.814297	0.814297	0.814297	0.814297	0.814297	0.814297	0.865712	0.900339	0.835288	0.815825	0.764647	0.844902	0.817664	0.819099	0.745483	0.783854	0.819274	0.64827	0.698214	0.788233	0.821826	0.831793	0.796132	0.752226	0.793138	0.802957	0.744206	0.663355	0.699446	0.607599	0.52945	0.631819	0.704855	0.756507	0.958368	0.887287	0.878208	0.854576	1.01525	1.04513	1.06229	1.08852	0.971933	1.04721	0.969735	0.841046	0.782999	0.717343
chr17:Tbc1d5		0.812082	0.812082	0.812082	0.812082	0.812082	0.812082	0.861142	1.09217	1.02852	1.10542	1.13595	1.05113	0.902582	0.938341	1.07487	1.04936	0.991592	0.932962	0.904078	0.773349	0.327927	0.0461416	-0.267798	-0.379911	-0.596595	-0.76183	-0.8202	-0.915382	-0.922717	-0.898638	-0.777311	-0.490634	-0.40105	-0.154077	0.00326604	0.194347	0.392539	0.41681	0.598973	0.596335	0.375345	0.486575	0.618083	0.744492	0.814805	0.749051	0.710785	0.501436
chr14:Kctd4		0.811835	0.811835	0.811835	0.811835	0.811835	0.811835	0.745488	0.783179	0.718885	0.769096	0.811439	0.790143	0.779981	0.806833	0.843346	0.873515	0.957507	1.0247	0.984416	1.02614	1.04893	1.15873	1.20288	1.22983	1.17635	1.19014	1.22859	1.26692	1.26527	1.25953	1.20776	1.14858	1.05038	1.01009	0.990292	0.990887	0.996604	0.894652	0.877124	0.895591	0.836136	0.842338	0.854222	0.857092	0.900837	0.920098	0.836723	0.788536
chr7:Cd81		0.809638	0.809638	0.809638	0.809638	0.809638	0.809638	0.748644	0.751212	0.739376	0.673049	0.7372	0.745949	0.74642	0.834948	0.8186	0.817067	0.839527	0.923692	0.956505	1.03367	1.15587	1.19386	1.26153	1.39088	1.39242	1.44678	1.48711	1.44542	1.39783	1.41621	1.33237	1.25423	1.1729	1.07217	0.961623	0.85873	0.771354	0.765162	0.678782	0.590011	0.491473	0.496786	0.420359	0.313163	0.248519	0.131916	0.0180092	-0.148874
chr1:Trip12		0.805789	0.805789	0.805789	0.805789	0.805789	0.805789	0.765806	0.698986	0.811952	1.12851	1.18878	1.02981	0.906972	0.970961	0.91734	0.904923	0.933867	0.870616	0.746218	0.378418	0.200534	-0.00108116	-0.129685	-0.0611586	-0.261581	-0.450285	-0.447073	-0.545218	-0.502291	-0.532271	-0.265097	-0.365298	-0.403675	-0.18237	-0.0666677	0.118864	0.157421	0.145945	0.0587181	0.0651497	0.109536	0.182689	0.400177	0.484492	0.436496	0.397832	0.175764	0.0851823
chr2:Casc4		0.805349	0.805349	0.805349	0.805349	0.805349	0.805349	0.761645	0.968617	1.2093	1.17528	1.07383	1.15921	1.14356	1.0676	1.05629	1.23334	1.17939	1.2912	1.09597	0.819132	0.859029	0.713738	0.678276	0.646521	0.776427	0.693755	0.575234	0.735049	0.830676	0.807706	0.802831	0.701124	0.724956	0.717984	0.655286	0.581011	0.536769	0.590109	0.402272	0.403023	0.383038	0.262001	0.316215	0.320376	0.258447	0.485459	0.505047	0.52729
chr6:Arl6ip5		0.802615	0.802615	0.802615	0.802615	0.802615	0.802615	0.64236	0.400805	0.420948	0.532846	0.436921	0.493642	0.39993	0.439399	0.556218	0.736034	0.702862	1.02883	1.0355	1.0053	1.10121	1.19448	1.29491	1.42152	1.44079	1.32508	1.44961	1.5	1.5	1.5	1.5	1.5	1.5	1.5	1.5	1.47377	1.37338	1.31929	1.04707	0.704081	0.627224	0.488568	0.232925	0.153734	-0.0284166	-0.134465	-0.198935	-0.207498
chr6:Irak2		0.80165	0.80165	0.80165	0.80165	0.80165	0.80165	0.777542	0.721122	0.825103	0.775002	0.703472	0.685783	0.698693	0.792793	0.694823	0.753699	0.677856	0.50385	0.494469	0.447781	0.47569	0.452272	0.339488	0.303545	0.210856	0.169585	0.244763	0.313856	0.355737	0.445103	0.446643	0.461361	0.587809	0.766426	0.844584	0.82863	0.985414	1.04099	1.07696	1.14946	1.16123	1.27486	1.18956	1.17321	1.08302	0.990481	0.999132	0.877804
chr4:Dhcr24		0.801413	0.801413	0.801413	0.801413	0.801413	0.801413	0.725693	0.681185	0.695382	0.709259	0.783272	0.776074	0.716101	0.719402	0.704604	0.822394	0.869021	0.868535	0.936375	0.947482	0.939115	1.06074	1.08236	1.14799	1.29224	1.38445	1.3089	1.35191	1.36609	1.32038	1.33878	1.29459	0.998162	1.00973	0.993901	0.893338	0.791899	0.762829	0.592267	0.523181	0.471694	0.441106	0.514526	0.620858	0.54932	0.531648	0.414278	0.515908
chr8:Gm21092		0.800639	0.800639	0.800639	0.800639	0.800639	0.800639	0.890229	0.926918	1.05085	1.08202	1.23817	1.29459	1.26282	1.28109	1.30519	1.11892	1.01479	0.972911	0.901917	0.686408	0.472183	0.328528	0.149397	0.190953	0.131661	-0.00704434	0.0194551	-0.0106459	-0.00183249	0.0434455	0.0540585	0.169794	0.197376	0.322793	0.211949	0.256151	0.39385	0.429537	0.586007	0.627369	0.506313	0.642562	0.719602	0.737372	0.657982	0.760035	0.79882	0.674396
chr6:St8sia1		0.797244	0.797244	0.797244	0.797244	0.797244	0.797244	0.685895	0.646384	0.690886	0.693779	0.765041	0.758114	0.623296	0.649894	0.661373	0.706344	0.769991	0.812264	0.729016	0.661921	0.770114	0.767321	0.764954	0.836858	0.884622	0.935337	1.0464	1.03212	1.08168	1.16323	1.16527	1.00502	0.962746	0.947905	0.91737	0.85181	0.801499	0.644217	0.719946	0.737667	0.783253	0.677202	0.701498	0.825855	0.824751	0.856052	0.900808	1.01013
chr1:Prelp		0.795935	0.795935	0.795935	0.795935	0.795935	0.795935	0.754443	0.840228	0.80941	0.88655	0.862324	0.872826	0.850547	0.888253	0.809613	0.921376	0.931408	0.920217	0.906349	0.946234	0.895371	0.878008	0.904753	0.879	0.780353	0.772172	0.687924	0.651689	0.737617	0.706524	0.638398	0.664377	0.699115	0.720324	0.734439	0.879998	0.920261	0.984933	1.00685	0.923736	0.980373	1.05098	1.04882	1.0772	1.00792	1.03998	0.964184	0.9391
chr4:Per3		0.792276	0.792276	0.792276	0.792276	0.792276	0.792276	0.777164	0.945986	1.044	1.12721	1.15656	1.096	1.05035	0.977251	1.02159	0.887268	0.997841	0.999162	0.765199	0.619047	0.457057	0.223067	0.19779	0.241111	0.257739	0.0980233	0.274274	0.0966601	-0.0211381	0.0391722	0.0887242	0.0737546	0.262949	0.319623	0.461688	0.465939	0.527693	0.495433	0.553439	0.797526	0.737822	0.861866	0.916512	0.884488	0.883472	0.762478	0.608241	0.511752
chr15:Khdrbs3		0.791788	0.791788	0.791788	0.791788	0.791788	0.791788	0.806121	0.913816	0.917188	0.909921	0.959132	0.838704	0.883143	0.845179	0.849346	0.856192	0.89679	0.866462	0.721704	0.723984	0.730579	0.725087	0.761732	0.796464	0.804513	0.774956	0.797631	0.703443	0.766661	0.729577	0.844135	0.801647	0.775398	0.78949	0.730231	0.746786	0.89272	0.832173	0.875258	0.792441	0.81818	0.752198	0.668226	0.67864	0.82423	0.883634	0.917129	0.882884
chr6:Cnot4		0.791179	0.791179	0.791179	0.791179	0.791179	0.791179	0.771323	0.869745	0.95039	1.07481	1.19322	1.16859	1.4073	1.32936	1.31233	1.43366	1.17297	1.0803	0.847872	0.589749	0.337852	-0.0177648	-0.220195	-0.580862	-0.703657	-0.765608	-1.13271	-1.11266	-1.09205	-1.09917	-1.0201	-0.888917	-0.851541	-0.775809	-0.604773	-0.403476	-0.402918	-0.260602	-0.183176	-0.151569	0.104265	0.275123	0.378543	0.606146	0.529846	0.664196	0.475058	0.516557
chr9:Rasa2		0.790938	0.790938	0.790938	0.790938	0.790938	0.790938	0.868772	1.02569	1.05524	1.15013	1.05	1.07876	1.16395	1.17223	1.24535	1.0596	1.0941	1.02959	0.94084	0.902482	0.819827	0.773022	0.722527	0.708839	0.659826	0.541293	0.577105	0.613667	0.502833	0.585065	0.625716	0.640441	0.735135	0.827209	0.785858	0.716975	0.814709	1.00647	1.03983	1.20013	1.14186	1.11019	1.21516	1.1501	1.1108	1.0928	1.08812	1.14807
chr2:Ehmt1		0.788534	0.788534	0.788534	0.788534	0.788534	0.788534	0.817792	0.873453	0.949351	0.976006	0.868034	0.965712	0.936688	0.927894	0.883204	0.933091	0.728393	0.682052	0.513342	0.399896	0.245253	0.044716	-0.0284589	-0.216024	-0.517481	-0.668237	-0.950972	-0.945249	-0.938623	-0.87281	-1.11812	-1.05226	-0.903129	-0.860815	-0.842061	-0.728768	-0.550089	-0.391037	-0.281049	-0.265949	-0.296035	-0.232323	0.0530026	0.154572	0.188498	0.134812	0.0855669	0.0466249
chr5:Srpk2		0.788423	0.788423	0.788423	0.788423	0.788423	0.788423	0.620345	0.931146	0.713513	0.649761	0.637769	0.669611	0.732742	0.760211	0.573814	0.509736	0.792164	0.777327	0.333941	0.396312	0.467408	0.476038	0.593431	0.422323	0.191477	0.157842	0.176843	-0.163275	-0.166464	0.338716	0.336088	0.326038	0.229589	-0.102814	0.0690885	0.316589	0.521546	0.485404	0.404992	0.496984	0.132957	0.24898	0.15264	0.300213	0.524864	0.26092	-0.0134756	-0.32301
chr10:Hey2		0.787159	0.787159	0.787159	0.787159	0.787159	0.787159	0.812521	0.740664	0.755006	0.851798	0.724529	0.676107	0.657881	0.796741	0.844234	0.927061	0.962587	1.05368	1.12501	1.15354	0.993755	0.95147	0.981159	0.884101	0.747094	0.841572	0.748583	0.731995	0.674372	0.714923	0.65338	0.907591	1.06774	1.12919	1.29727	1.29234	1.15768	1.18706	1.18026	1.25624	1.26645	1.27499	1.05555	0.985412	0.886609	0.772674	0.764259	0.753162
chr5:Tmem33		0.785901	0.785901	0.785901	0.785901	0.785901	0.785901	0.697796	0.790908	0.910221	0.916579	0.815716	0.980909	1.10702	1.28172	1.31056	1.24874	1.28767	1.38832	1.34299	1.29326	1.34224	1.21583	1.18284	1.15833	1.07191	0.91587	1.04022	1.04686	0.914265	0.95351	0.825468	0.752426	0.805456	0.841271	0.841847	0.760993	0.817801	0.779265	0.660874	0.647601	0.654457	0.832575	0.766331	0.674991	0.613956	0.49717	0.547721	0.619413
chr16:Brwd1		0.785855	0.785855	0.785855	0.785855	0.785855	0.785855	0.669146	0.679066	0.496169	0.241059	0.343838	0.220901	-0.058848	0.0421705	-0.197383	-0.238044	-0.201558	-0.199683	-0.140649	-0.339343	-0.170504	-0.499709	-0.535006	-0.566418	-0.728169	-0.588599	-0.620413	-0.736322	-0.847896	-1.02173	-0.938828	-1.03773	-0.760241	-0.852276	-0.621516	-0.64596	-0.658035	-0.593045	-0.534989	-0.311859	-0.416529	-0.426571	-0.179688	-0.141623	0.00475761	-0.0108636	0.188733	0.245056
chr7:Ttyh1		0.785396	0.785396	0.785396	0.785396	0.785396	0.785396	0.733656	0.745538	0.73011	0.693011	0.690164	0.690853	0.672443	0.725995	0.759354	0.81532	0.830942	0.913445	0.90547	0.984186	1.06728	1.10865	1.15832	1.24682	1.25058	1.28573	1.27555	1.27353	1.28369	1.34113	1.24858	1.19243	1.15735	1.0906	1.05037	1.01534	0.970375	0.961563	0.899875	0.82822	0.740934	0.755137	0.730272	0.682287	0.685802	0.664118	0.634222	0.61841
chr9:D630033O11Rik		0.784675	0.784675	0.784675	0.784675	0.784675	0.784675	0.868534	0.786449	0.813878	0.728905	0.798187	0.911152	0.803398	0.730148	0.682089	0.635867	0.755663	0.69762	0.755491	0.800417	0.742654	0.70546	0.612278	0.628832	0.642018	0.582558	0.656642	0.596642	0.6806	0.609992	0.584475	0.572246	0.613057	0.638914	0.642707	0.682301	0.735401	0.799201	0.754916	0.624078	0.735924	0.69009	0.79513	0.781934	0.860111	0.856241	0.890147	0.93937
chr8:Calr		0.784661	0.784661	0.784661	0.784661	0.784661	0.784661	0.660582	0.653139	0.625599	0.585386	0.565643	0.440021	0.666962	0.777889	0.794829	0.75898	0.838461	0.889823	0.955746	0.99924	1.05898	1.21398	1.34663	1.32563	1.34378	1.34403	1.29943	1.27292	1.19441	1.10704	1.07148	1.04786	0.986346	0.93423	0.808064	0.71739	0.676435	0.618926	0.600192	0.680455	0.659682	0.509463	0.386462	0.14504	0.0262459	0.0252065	-0.104728	-0.198543
chr16:Slc15a2		0.784396	0.784396	0.784396	0.784396	0.784396	0.784396	0.807122	0.900635	1.0175	0.922925	0.934258	0.815042	0.757394	0.705742	0.584175	0.576703	0.632907	0.655286	0.484571	0.376348	0.311275	0.223817	0.179653	0.156977	0.118048	0.124279	0.122443	0.0450437	-0.00882386	-0.0518951	-0.0675426	-0.0825753	-0.0131617	0.17387	0.214852	0.232805	0.182466	0.106468	0.0847399	0.0350666	0.102527	0.169839	0.217152	0.1733	0.112779	-0.0270194	-0.00429366	0.105323
chr14:Abhd6		0.78349	0.78349	0.78349	0.78349	0.78349	0.78349	0.831202	0.887406	0.996972	1.0813	1.10044	1.14754	1.20319	1.273	1.24609	1.17668	1.1995	1.08988	1.10239	1.0264	1.04635	0.926605	0.929044	0.806456	0.716863	0.836362	0.797651	0.753665	0.840626	0.735664	0.819778	0.706173	0.736668	0.734563	0.892885	0.930769	0.874459	0.924419	0.836893	0.787723	0.857248	0.790748	0.946698	1.04744	1.0552	0.955903	0.839399	0.847827
chr19:Pdcd4		0.783368	0.783368	0.783368	0.783368	0.783368	0.783368	0.76488	0.801624	0.76076	0.700577	0.681908	0.711116	0.7054	0.778758	0.834805	0.839645	0.815543	0.900857	0.92684	1.00212	1.04203	1.07953	1.0579	1.15176	1.11523	1.06899	1.16105	1.18962	1.17962	1.1539	1.11309	1.10139	1.10712	1.05692	1.03215	1.07271	1.15007	1.08119	1.00749	0.979375	0.953092	0.931738	0.881359	0.851471	0.852953	0.802552	0.816781	0.771316
chrX:Tbl1x		0.783097	0.783097	0.783097	0.783097	0.783097	0.783097	0.809773	0.838488	0.866343	0.908336	0.949567	0.746655	0.797914	0.618552	0.689203	0.848765	0.894784	0.822627	0.705305	0.758458	0.803731	0.7317	0.463528	0.380921	0.320581	0.269173	0.0137018	0.0325713	-0.0146169	0.0999831	0.00522763	-0.0332435	0.0303554	0.192552	0.13873	0.304816	0.0429814	0.109647	0.178206	0.124792	0.276995	0.306473	0.467826	0.427244	0.394073	0.605867	0.471676	0.895063
chr4:Arhgef19		0.781844	0.781844	0.781844	0.781844	0.781844	0.781844	0.838226	0.724129	0.753002	0.803526	0.746395	0.792783	0.897333	0.811987	0.698116	0.802446	0.716442	0.68045	0.703915	0.509352	0.476243	0.492503	0.415458	0.391186	0.423882	0.409383	0.332127	0.343657	0.389529	0.445541	0.534146	0.522675	0.595548	0.641536	0.593209	0.613109	0.729458	0.791935	0.814186	0.795045	0.633029	0.67626	0.690071	0.822842	0.721714	0.629907	0.525836	0.289846
chr19:Fbxw4		0.780976	0.780976	0.780976	0.780976	0.780976	0.780976	0.836625	0.634403	0.491968	0.515243	0.472824	0.201626	0.0660585	-0.0995374	-0.303807	-0.53357	-0.844389	-0.611912	-0.589991	-0.550595	-0.422289	-0.534536	-0.453216	-0.438793	-0.326952	-0.0814106	0.107842	0.282503	0.473824	0.383024	0.259987	-0.08623	-0.0612177	-0.0624853	-0.185419	-0.170649	-0.136961	-0.316736	-0.413735	-0.816125	-0.684043	-0.816213	-0.713594	-0.612843	-0.797013	-0.738925	-1.00405	-1.32579
chr7:Cox6b2		0.780884	0.780884	0.780884	0.780884	0.780884	0.780884	0.939737	1.11797	1.20833	1.38216	1.5	1.5	1.5	1.43871	1.42706	1.30342	1.2539	1.02488	0.917042	0.875503	0.720843	0.512642	0.397148	0.347053	0.296949	0.223986	0.352823	0.304239	0.356019	0.422298	0.419119	0.474413	0.521007	0.455746	0.565268	0.672809	0.772656	0.666276	0.749843	0.68057	0.662725	0.670566	0.63485	0.746597	0.774162	0.742308	0.780667	0.671007
chr17:Gm26848		0.779681	0.779681	0.779681	0.779681	0.779681	0.779681	0.793582	0.834734	0.847852	0.877086	0.836225	0.964649	1.02848	0.901379	0.941997	0.92547	0.920929	0.99777	0.948445	0.88218	0.921493	0.811069	0.749688	0.759037	0.834128	0.835752	0.787373	0.750465	0.664365	0.779676	0.866097	0.803603	0.909799	0.917959	0.877071	0.813607	0.775468	0.820669	0.856964	0.826152	0.779603	0.756877	0.591449	0.471607	0.363136	0.412966	0.318329	0.144077
chr5:Adgrl3		0.779651	0.779651	0.779651	0.779651	0.779651	0.779651	0.741579	0.831907	1.02657	0.983065	0.939737	0.780283	0.994237	1.1383	1.22845	1.28182	1.20892	1.26622	1.07614	0.845107	0.500755	0.191015	-0.0460327	-0.403901	-0.715985	-0.808452	-0.975989	-0.806457	-0.75706	-0.922468	-0.928723	-0.686998	-0.412799	-0.392081	-0.519585	-0.342679	-0.339468	-0.421988	-0.544679	-0.658734	-0.525737	-0.536567	-0.553414	-0.502525	-0.375094	-0.0117118	-0.0198465	-0.10847
chr6:Gm15581		0.778881	0.778881	0.778881	0.778881	0.778881	0.778881	0.81234	0.760161	0.790216	0.804943	0.861266	0.823753	0.720736	0.641484	0.721768	0.74178	0.730957	0.702424	0.752239	0.742916	0.684773	0.669026	0.726989	0.880786	0.95268	0.965069	0.91554	1.02627	1.07238	1.03624	1.09778	1.17821	1.18371	1.20197	1.16297	1.15719	1.19892	1.21336	1.11291	1.15187	1.14158	1.0966	1.10855	1.16675	1.14649	1.04173	1.06637	1.05898
chr4:Clstn1		0.77255	0.77255	0.77255	0.77255	0.77255	0.77255	0.730271	0.679175	0.621636	0.682375	0.771828	0.867838	0.912445	0.954013	0.941424	0.907883	0.972361	0.991992	0.949351	0.906585	0.815669	0.81811	0.701368	0.711122	0.732637	0.75134	0.721401	0.693359	0.654976	0.719298	0.756849	0.798201	0.733823	0.752014	0.71845	0.669913	0.669266	0.664003	0.687004	0.718435	0.595611	0.528106	0.501275	0.495878	0.516825	0.480228	0.515179	0.511436
chr9:Plscr1		0.771279	0.771279	0.771279	0.771279	0.771279	0.771279	0.78732	0.835344	0.78848	0.870072	0.830657	0.890591	0.92688	1.01614	0.841541	0.72736	0.642376	0.460157	0.399013	0.443505	0.398758	0.374249	0.497234	0.33316	0.333326	0.349629	0.357434	0.371128	0.403354	0.496212	0.455353	0.475066	0.59332	0.579882	0.832764	0.77296	0.855818	0.986131	1.05564	1.14839	1.06071	1.20196	1.29214	1.33053	1.24873	1.10539	1.12376	1.19765
chrX:Xist		0.770503	0.770503	0.770503	0.770503	0.770503	0.770503	0.833784	0.680925	0.577945	0.477292	0.363381	0.277291	0.220299	0.159063	0.188857	0.0943139	-0.0240438	-0.0867699	-0.0753955	-0.137715	-0.198569	-0.290728	-0.42096	-0.475481	-0.56317	-0.626981	-0.621722	-0.618685	-0.649275	-0.707409	-0.669164	-0.615696	-0.563128	-0.482865	-0.441523	-0.372154	-0.282276	-0.192429	-0.155902	-0.115513	-0.101638	-0.154079	-0.154018	-0.155042	-0.11137	-0.12846	-0.113637	-0.150177
chr3:Rhoc		0.769911	0.769911	0.769911	0.769911	0.769911	0.769911	0.698093	0.6969	0.609862	0.484063	0.303309	0.300241	0.153346	0.168524	0.0844492	0.156267	0.253462	0.373754	0.564524	0.794923	0.936719	1.09431	1.28834	1.42566	1.5	1.5	1.5	1.5	1.47442	1.43357	1.28059	1.14222	1.05345	0.82471	0.787411	0.634669	0.585141	0.414607	0.374585	0.387805	0.278141	0.24782	0.248003	0.253266	0.310117	0.345269	0.445154	0.45435
chr8:Nr3c2		0.769782	0.769782	0.769782	0.769782	0.769782	0.769782	0.766264	0.850054	0.863606	0.880008	0.816257	0.740974	0.730165	0.735489	0.846546	0.738076	0.646359	0.605322	0.602298	0.411584	0.402133	0.37746	0.604558	0.532281	0.460392	0.349567	0.482557	0.640567	0.669493	0.680685	0.801387	0.89138	0.853893	0.898511	0.892162	0.862509	0.991363	0.966024	0.932762	1.13429	1.20299	1.28734	1.22034	1.2943	1.33962	1.33553	1.30658	1.21889
chr14:Gm5087		0.769214	0.769214	0.769214	0.769214	0.769214	0.769214	0.906668	0.825843	0.873082	1.18812	1.20485	1.255	1.28373	1.37037	1.39462	1.36144	1.21447	0.918926	0.746432	0.715314	0.425595	0.15773	-0.0900892	-0.301424	-0.377292	-0.594486	-0.578441	-0.518917	-0.322709	-0.154515	-0.216565	-0.0403908	0.134027	0.381334	0.512047	0.742587	0.83848	0.889922	0.827584	0.804634	0.913962	1.07661	1.00271	1.03229	1.01589	0.938927	0.66971	0.692739
chr4:Ptprd		0.768695	0.768695	0.768695	0.768695	0.768695	0.768695	0.79869	0.600286	0.36956	0.451974	0.626074	0.525797	0.524882	0.509302	0.67298	0.58512	0.31891	0.238505	0.165218	0.0137216	-0.328692	-0.572101	-0.758393	-0.859008	-0.941357	-1.13812	-1.19031	-1.24575	-1.24856	-1.15587	-1.07376	-0.880259	-0.822299	-0.76501	-0.798748	-0.94889	-0.768487	-0.859529	-0.702244	-0.696236	-0.722704	-0.891083	-0.970531	-1.00368	-1.02245	-0.955389	-0.967129	-1.04474
chr13:Mast4		0.76723	0.76723	0.76723	0.76723	0.76723	0.76723	0.786359	0.720274	0.77106	0.793704	0.813954	0.894833	0.8361	0.853902	0.925971	0.930615	0.872635	0.833224	0.874103	0.958786	0.872649	0.891341	0.731973	0.736238	0.648915	0.488399	0.535411	0.569952	0.625889	0.652578	0.639841	0.736937	0.73819	0.832885	0.827816	0.954962	1.10073	1.07786	1.18872	1.2607	1.29755	1.27873	1.35639	1.41482	1.39917	1.5	1.33579	1.32592
chr16:P3h2		0.767141	0.767141	0.767141	0.767141	0.767141	0.767141	0.708035	0.59168	0.590833	0.699107	0.860074	0.736306	0.852893	0.848662	0.747997	0.735991	0.690197	0.763918	0.804582	0.77191	0.593098	0.44303	0.520537	0.422675	0.415417	0.479796	0.523074	0.624132	0.668693	0.728603	0.827683	0.981166	1.05503	1.12952	1.18075	1.29181	1.33632	1.33897	1.29712	1.20424	1.28051	1.21519	1.13748	1.09839	1.06563	1.16855	1.06139	1.04264
chr11:Vstm2a		0.765991	0.765991	0.765991	0.765991	0.765991	0.765991	0.694944	0.89523	0.977966	1.04092	1.05099	1.23498	1.1051	1.14865	1.30046	1.2167	1.33291	1.3224	1.20301	1.08176	1.15707	1.09713	1.01691	0.906046	0.732783	0.6845	0.789847	0.813034	0.890514	0.859287	0.938426	0.721362	0.806155	0.639308	0.641995	0.455873	0.228509	0.131742	-0.0460305	0.00111038	-0.212963	-0.212821	-0.204757	-0.203426	-0.14576	-0.10799	0.0775582	0.307178
chr6:Calu		0.765669	0.765669	0.765669	0.765669	0.765669	0.765669	0.476848	0.354012	0.275845	0.275895	0.321437	0.394661	0.380278	0.345757	0.142865	0.0928334	0.141374	0.315283	0.357517	0.469506	0.524391	0.467355	0.532519	0.586884	0.716605	0.892928	0.896697	0.897395	0.854278	0.80579	0.766851	0.751433	0.980675	0.97422	1.11791	1.15726	1.10258	1.22197	1.0668	1.13973	1.38899	1.45415	1.5	1.41431	1.42868	1.37037	1.30915	1.5
chr19:Malat1		0.76414	0.76414	0.76414	0.76414	0.76414	0.76414	0.851124	0.871227	0.982011	1.06394	1.13857	1.1601	1.24538	1.31502	1.37971	1.38026	1.34444	1.27997	1.23217	1.12836	1.01102	0.910414	0.833762	0.732612	0.631405	0.545577	0.489356	0.48402	0.506733	0.50346	0.517893	0.583029	0.623898	0.668535	0.714343	0.7672	0.813818	0.84637	0.86826	0.888422	0.894965	0.87814	0.840905	0.80811	0.754917	0.659117	0.529053	0.376667
chr6:Cav1		0.763851	0.763851	0.763851	0.763851	0.763851	0.763851	0.756124	0.722513	0.733123	0.711352	0.695506	0.720038	0.7031	0.727849	0.736079	0.763589	0.797431	0.81312	0.877452	0.903631	0.948733	0.966687	1.00671	1.06756	1.06815	1.08106	1.08307	1.10534	1.12194	1.09476	1.08118	1.08451	1.10674	1.09186	1.06367	1.07271	1.07332	1.07382	1.05906	1.02633	0.997313	0.982328	0.957182	0.966607	0.939097	0.94228	0.926983	0.948359
chrX:Tex11		0.761855	0.761855	0.761855	0.761855	0.761855	0.761855	0.883287	1.04489	1.41356	1.5	1.5	1.5	1.5	1.5	1.5	1.5	1.5	1.2207	0.984324	0.602223	0.429037	0.196046	-0.229603	-0.491658	-0.827292	-1.11897	-1.13087	-1.26778	-1.1649	-1.07193	-0.894861	-0.906011	-0.625085	-0.190574	0.119038	0.38441	0.685867	0.740549	0.803452	0.904225	0.979725	1.12968	1.25844	1.16604	1.05927	0.730711	0.636403	0.456184
chr6:Exoc4		0.761108	0.761108	0.761108	0.761108	0.761108	0.761108	0.943942	0.965829	0.885842	0.95711	1.01159	0.852013	1.22871	1.22203	1.3083	1.27698	1.03702	0.809888	0.509378	0.378029	0.0971453	-0.429247	-0.610568	-0.874545	-1.04399	-1.41565	-1.48798	-1.35274	-1.27572	-1.0351	-0.811628	-0.629988	-0.269995	-0.400345	-0.260778	0.0311659	0.374323	0.425984	0.63029	0.67659	0.976735	0.828113	0.96673	1.11058	1.3091	1.3119	1.15913	1.22948
chr4:Col27a1		0.756517	0.756517	0.756517	0.756517	0.756517	0.756517	0.964522	0.957045	0.732202	0.704975	0.731462	0.506119	0.364147	0.385231	0.251126	0.336025	0.405651	0.207031	0.241032	0.256358	0.211457	0.115029	0.147706	0.278255	0.0987833	-0.0517779	-0.193363	-0.124244	-0.152117	-0.06521	-0.141508	-0.0851507	-0.0473264	0.0243133	-0.023936	-0.0616723	0.0419206	-0.0205872	-0.242409	-0.215228	-0.418654	-0.461333	-0.529755	-0.603431	-0.672322	-0.76346	-0.5955	-0.568697
chr18:Aqp4	Y	0.754602	0.754602	0.754602	0.754602	0.754602	0.754602	0.740011	0.761969	0.761315	0.759775	0.802562	0.815643	0.858544	0.861219	0.872237	0.891051	0.921632	0.966166	0.972825	0.949653	0.926905	0.884028	0.838516	0.813893	0.78267	0.745345	0.716126	0.677269	0.642798	0.616203	0.617388	0.611789	0.602241	0.647242	0.662323	0.658254	0.649662	0.6721	0.659528	0.674139	0.671731	0.672736	0.702549	0.726768	0.708181	0.732008	0.765235	0.882947
chr19:Add3		0.754525	0.754525	0.754525	0.754525	0.754525	0.754525	0.667581	0.623964	0.581933	0.514642	0.458859	0.43723	0.442927	0.407324	0.3885	0.402674	0.486238	0.562814	0.627284	0.671849	0.786733	0.848379	0.836826	0.941125	1.00754	1.18227	1.16842	1.15028	1.18939	1.16748	1.17518	1.159	1.12973	1.04877	0.954925	0.904768	0.682207	0.559786	0.462481	0.33824	0.223608	0.1263	0.065944	0.0325348	0.113873	0.117207	0.213705	0.349502
chr18:Csnk1a1		0.753988	0.753988	0.753988	0.753988	0.753988	0.753988	0.825898	0.558232	0.87915	0.909055	0.775036	0.742677	0.582698	0.563562	0.565143	0.661835	0.359967	0.187057	0.182543	-0.259232	-0.523948	-0.640144	-0.768704	-0.864161	-0.953881	-1.07385	-1.31043	-1.34904	-1.31545	-1.28681	-1.27689	-1.01118	-0.927763	-0.793998	-0.653281	-0.421592	-0.286193	-0.0616161	0.0195075	0.0158377	0.122677	0.191555	0.28092	0.279538	0.213204	0.122369	0.121842	-0.0769414
chr16:Abat		0.751815	0.751815	0.751815	0.751815	0.751815	0.751815	0.759592	0.647545	0.423383	0.269339	0.214552	0.0404682	-0.0434557	-0.163895	-0.178466	-0.104017	-0.128929	-0.300601	-0.17784	-0.152582	0.0762701	0.0278338	0.124188	0.180832	0.088106	0.0270477	-0.0338314	0.0190571	0.113681	0.0655993	0.0638056	-0.0655579	0.0635728	0.0679943	0.0559326	0.247871	0.379091	0.334653	0.276376	0.250178	0.268159	0.402108	0.488352	0.608083	0.636049	0.621777	0.336714	0.320849
chr1:Crb1		0.751404	0.751404	0.751404	0.751404	0.751404	0.751404	0.762577	0.734936	0.743571	0.672614	0.637638	0.573788	0.62839	0.633199	0.678613	0.622484	0.555815	0.477548	0.342971	0.232911	0.177913	0.078768	0.00670943	-0.137264	-0.175346	-0.292799	-0.331023	-0.404525	-0.343509	-0.373444	-0.450848	-0.377744	-0.392561	-0.445519	-0.367791	-0.40283	-0.428305	-0.363051	-0.243425	-0.249004	-0.182219	-0.158273	-0.204771	-0.206586	-0.212339	-0.408018	-0.473445	-0.497589
chr10:Gng7		0.749773	0.749773	0.749773	0.749773	0.749773	0.749773	0.88409	0.924754	0.918216	0.843995	0.723843	0.620383	0.509316	0.395958	0.595706	0.740298	0.640956	0.528901	0.553352	0.548317	0.590316	0.553269	0.536092	0.492902	0.563859	0.259738	0.218937	0.451456	0.458026	0.386051	0.52418	0.584875	0.538258	0.548351	0.610579	0.495564	0.601371	0.395897	0.239362	0.148532	0.342353	0.237552	0.360121	0.499097	0.57709	0.536185	0.897533	0.908854
chr4:Lrrc42		0.749474	0.749474	0.749474	0.749474	0.749474	0.749474	0.610683	0.64459	0.578428	0.57173	0.557778	0.47618	0.428367	0.347266	0.42862	0.502341	0.539812	0.677412	0.72878	0.916623	1.13496	1.25797	1.3666	1.41455	1.5	1.4583	1.42272	1.45645	1.4731	1.44301	1.32035	1.11675	0.968534	0.872749	0.777709	0.625967	0.609144	0.568812	0.511621	0.389962	0.197237	0.150403	0.212537	0.209496	0.148034	0.252314	0.339466	0.309207
chr3:Ptbp2		0.749213	0.749213	0.749213	0.749213	0.749213	0.749213	0.893595	0.89747	0.829693	0.919039	0.869923	0.9103	0.991716	0.940045	0.905266	0.916439	0.868707	0.703621	0.759658	0.726994	0.505868	0.453549	0.344894	0.284033	0.207352	0.17592	0.193264	0.165305	0.197348	0.124707	0.137765	0.205801	0.285207	0.201479	0.128852	0.134394	0.21966	0.177849	0.231124	0.238713	0.221304	0.174763	0.125839	0.0191028	0.0839857	0.0304173	0.0701981	-0.062975
chr10:Cd24a		0.746476	0.746476	0.746476	0.746476	0.746476	0.746476	0.698081	0.773063	0.723323	0.666111	0.762682	0.727737	0.701445	0.758302	0.725534	0.847288	0.923925	1.03128	1.04005	1.12141	1.27084	1.37229	1.48149	1.5	1.5	1.5	1.5	1.5	1.5	1.5	1.43829	1.30385	1.15712	1.0423	0.842722	0.761612	0.546817	0.430097	0.360316	0.277586	0.265449	0.242474	0.206327	0.169725	0.207976	0.285296	0.354177	0.489708
chr16:Gm11146		0.746318	0.746318	0.746318	0.746318	0.746318	0.746318	0.855532	0.883912	0.964038	1.00682	1.00452	1.06091	1.10305	1.12439	1.11023	1.15352	1.1049	1.03252	0.976594	0.971295	0.931877	0.987601	0.833004	0.803815	0.864492	0.876056	0.861308	0.916762	0.935993	0.981939	0.953546	1.04085	1.04895	1.1385	1.15983	1.10855	1.07426	1.01584	1.05884	1.09167	1.07595	1.0176	0.998217	0.983958	0.994474	0.990513	0.954513	0.933921
chr7:Prss23		0.74614	0.74614	0.74614	0.74614	0.74614	0.74614	0.684031	0.637425	0.638799	0.638365	0.657204	0.710125	0.779291	0.914115	0.949744	1.02905	1.00267	1.10106	1.01385	1.03088	1.12858	1.14634	1.26841	1.30834	1.21881	1.24018	1.16662	1.16047	1.03587	1.02246	1.06518	1.10595	1.0577	0.999466	1.03231	1.09348	1.03588	1.07111	1.13378	1.20226	1.27428	1.16117	0.970258	0.916793	0.800425	0.733524	0.524252	0.615848
chr1:Arhgef4		0.746071	0.746071	0.746071	0.746071	0.746071	0.746071	0.680069	0.614175	0.724849	0.889418	0.942244	0.913254	0.963528	1.01538	1.06028	1.01123	0.880735	0.907008	0.854881	0.748359	0.603093	0.459444	0.470506	0.303085	0.239847	0.197282	0.122244	0.13884	0.0947689	0.186255	0.338374	0.428903	0.56404	0.644162	0.82635	0.948419	1.03155	1.17192	1.1854	1.20493	1.20616	1.21127	1.23321	1.16626	1.06206	0.945064	0.935473	0.835262
chr3:Tnik		0.745809	0.745809	0.745809	0.745809	0.745809	0.745809	0.740878	0.67575	0.724824	0.881143	0.927662	0.940631	0.884719	0.963039	1.04022	0.807367	0.722004	0.578153	0.381908	0.0653222	-0.21461	-0.460406	-0.758274	-0.985013	-1.07283	-1.23036	-1.06171	-1.16651	-1.12946	-1.06055	-0.957038	-0.833702	-0.69177	-0.502263	-0.35565	-0.316984	-0.202366	-0.249872	-0.0434498	0.111139	0.127336	0.0745696	0.12693	0.0903743	0.119571	0.0116699	-0.0242853	-0.189667
chr8:Galnt7		0.738312	0.738312	0.738312	0.738312	0.738312	0.738312	0.738516	0.661526	0.758991	0.797931	0.686591	0.766746	0.762794	0.727341	0.745686	0.803434	0.899076	0.883464	0.889926	0.810029	0.674193	0.605475	0.536436	0.416365	0.231432	0.340347	0.386731	0.295845	0.434859	0.473385	0.563502	0.706563	0.888203	0.98951	1.0409	1.23736	1.20226	1.13207	1.21099	1.2016	1.29392	1.31024	1.34248	1.33995	1.22345	1.18616	1.04565	1.16231
chr10:Arhgap18		0.735457	0.735457	0.735457	0.735457	0.735457	0.735457	0.883707	1.05764	1.04525	1.12658	1.03807	1.20645	1.0386	1.03948	1.08513	0.965463	1.02438	0.816825	0.592378	0.589052	0.513392	0.589807	0.41492	0.617508	0.536717	0.546594	0.500138	0.451124	0.553069	0.505181	0.567083	0.669687	0.615935	0.673988	0.623575	0.493592	0.454355	0.576038	0.642554	0.647443	0.810755	0.817437	0.880111	0.867667	0.803216	0.814194	0.988171	0.854756
chr4:Hspb11		0.73476	0.73476	0.73476	0.73476	0.73476	0.73476	0.788578	0.822238	0.859672	0.825223	0.83551	0.813201	0.885508	0.957229	1.00764	1.057	0.995682	1.00684	0.915117	0.831969	0.930418	0.930146	1.10659	1.1897	1.09522	1.06129	1.11454	1.11134	1.09536	1.13574	1.18131	1.07815	1.05941	0.914468	0.750981	0.713058	0.728366	0.615177	0.768314	0.615643	0.682522	0.603072	0.546691	0.532898	0.50064	0.557731	0.644557	0.666922
chr19:Atrnl1		0.731836	0.731836	0.731836	0.731836	0.731836	0.731836	0.78692	0.795917	0.735198	0.804391	0.786711	1.0085	1.02799	1.02949	1.04084	0.99945	1.00224	0.979103	0.904965	0.834656	0.789739	0.695643	0.395315	0.258597	0.254929	0.15318	0.105162	0.0191487	-0.00308288	0.0386266	0.189072	0.208616	0.350178	0.469557	0.643806	0.803993	0.897925	1.06304	1.25016	1.27143	1.31151	1.28245	1.31012	1.26119	1.3231	1.21909	1.10109	1.10659
chr11:Galnt10		0.731776	0.731776	0.731776	0.731776	0.731776	0.731776	0.76749	0.733819	0.77517	0.680903	0.565123	0.62489	0.430653	0.210766	0.0772096	0.019463	0.111302	0.0719254	0.0202294	-0.172675	-0.0653166	-0.133356	-0.385772	-0.357919	-0.293919	-0.10417	-0.336836	-0.47686	-0.415405	-0.51253	-0.494062	-0.644381	-0.472998	-0.432976	-0.381001	-0.205246	-0.298099	-0.189361	-0.284978	-0.429783	-0.388377	-0.400273	-0.374028	-0.443402	-0.476403	-0.626983	-0.779304	-0.88161
chr6:Cav2		0.7305	0.7305	0.7305	0.7305	0.7305	0.7305	0.733153	0.684184	0.637833	0.629027	0.576449	0.558432	0.544276	0.578844	0.602933	0.616591	0.622197	0.665977	0.742241	0.908531	1.00277	1.10147	1.22202	1.27098	1.29033	1.29473	1.35828	1.39612	1.3873	1.39958	1.28566	1.20963	1.12581	1.04876	0.977693	0.968639	0.931963	0.839751	0.755174	0.694029	0.622961	0.627806	0.625674	0.611295	0.614166	0.656241	0.603023	0.662945
chr11:Igfbp4		0.728769	0.728769	0.728769	0.728769	0.728769	0.728769	0.667505	0.633528	0.669682	0.64849	0.630869	0.735455	0.766603	0.777922	0.893733	0.86328	0.854622	0.944993	1.00746	0.953684	0.958014	1.01535	0.914468	0.852749	0.840655	0.764268	0.818555	0.903928	0.920538	0.841809	0.937094	1.00463	0.93313	1.06694	1.06076	1.09597	1.0687	1.1176	1.04512	0.991343	1.01762	0.911661	0.923482	0.927947	0.770382	0.795711	0.84421	0.904662
chr6:Aass		0.728586	0.728586	0.728586	0.728586	0.728586	0.728586	0.605864	0.625698	0.587472	0.657453	0.663354	0.632652	0.613247	0.61011	0.570932	0.523213	0.558092	0.846297	0.819444	0.783468	0.75996	0.715994	0.843127	0.88449	0.877851	0.952379	0.971758	0.994292	0.836892	0.796255	0.855982	0.825141	0.863954	0.853067	0.830875	0.926245	0.907297	0.934518	0.907943	0.85628	0.935745	0.833747	0.911538	0.941194	0.926708	1.00944	0.916995	0.858853
chr12:Arhgap5		0.725725	0.725725	0.725725	0.725725	0.725725	0.725725	0.662321	0.711938	0.75874	0.578355	0.635092	0.559221	0.575926	0.435627	0.403582	0.360361	0.302466	0.348303	0.31565	0.418378	0.600057	0.69154	0.671105	0.582449	0.665761	0.657131	0.639793	0.647989	0.676915	0.636091	0.448311	0.527117	0.427566	0.466631	0.63705	0.52321	0.577309	0.637522	0.666098	0.499038	0.563715	0.571822	0.429913	0.450269	0.48291	0.445234	0.640441	0.731517
chrX:Magt1		0.720955	0.720955	0.720955	0.720955	0.720955	0.720955	0.636492	0.65028	0.75495	0.83903	0.860913	0.85764	0.900187	0.872506	0.998825	1.08262	1.0004	0.983546	0.999218	0.893945	0.848445	0.89415	0.926755	0.968938	1.00866	0.943185	0.762869	0.731624	0.802349	0.736741	0.810757	0.755506	0.642235	0.714769	0.731093	0.833155	0.855054	0.849085	0.863415	0.915348	0.839195	0.757306	0.805533	0.932665	1.03164	1.04793	1.03818	1.14042
chr11:Nlk		0.716833	0.716833	0.716833	0.716833	0.716833	0.716833	0.787822	0.778937	0.764097	0.721236	0.811746	0.813505	0.834388	0.785782	0.80798	0.821635	0.83225	0.830027	0.805555	0.746674	0.711156	0.557092	0.453923	0.358258	0.287747	0.252196	0.237592	0.223651	0.216581	0.256925	0.328282	0.30964	0.423717	0.53564	0.577995	0.640456	0.696096	0.723793	0.731741	0.727157	0.650476	0.61656	0.626922	0.572237	0.532005	0.447302	0.427391	0.349302
chr7:Htra1		0.716544	0.716544	0.716544	0.716544	0.716544	0.716544	0.727881	0.748216	0.74733	0.784186	0.803799	0.782675	0.865412	0.865149	0.91678	0.911225	0.902861	0.897113	0.866832	0.885339	0.842352	0.781643	0.798341	0.762057	0.761498	0.681093	0.670744	0.695532	0.713664	0.713716	0.735823	0.759421	0.845215	0.889768	0.962082	1.01515	1.05228	1.0997	1.08452	1.11709	1.15353	1.14764	1.15892	1.14773	1.10555	1.03277	0.97414	0.919251
chr14:Lgals3		0.71413	0.71413	0.71413	0.71413	0.71413	0.71413	0.645352	0.641594	0.607119	0.598797	0.576192	0.551297	0.558776	0.573134	0.572134	0.616682	0.665878	0.801345	0.894744	1.05563	1.20317	1.34902	1.5	1.5	1.5	1.5	1.5	1.5	1.5	1.5	1.5	1.41531	1.28531	1.14585	1.03037	0.898995	0.750729	0.695112	0.645788	0.58508	0.525125	0.519017	0.488839	0.460832	0.485436	0.491109	0.536705	0.607744
chr14:Mycbp2		0.713703	0.713703	0.713703	0.713703	0.713703	0.713703	0.807842	0.854438	0.823281	0.725594	0.796714	0.759882	0.754582	0.716977	0.685726	0.664016	0.56626	0.444331	0.322707	0.152867	0.067196	-0.20998	-0.302946	-0.464771	-0.549045	-0.600337	-0.691196	-0.741054	-0.745627	-0.826445	-0.802646	-0.615768	-0.473053	-0.484295	-0.352313	-0.300442	-0.194351	-0.0762227	0.0921203	0.181707	0.300076	0.210369	0.167469	0.210921	0.37331	0.301027	0.286959	0.261683
chr13:Gcnt4		0.71358	0.71358	0.71358	0.71358	0.71358	0.71358	0.790089	0.771496	0.714066	0.632151	0.590931	0.63328	0.689756	0.67622	0.715631	0.767949	0.864375	0.802259	0.835131	0.83203	0.783449	0.721878	0.665895	0.576602	0.594009	0.550231	0.478466	0.408268	0.519162	0.585781	0.757986	0.859527	0.948314	0.987657	0.987884	1.04628	1.05424	1.16642	1.24428	1.10883	1.10669	1.01417	1.00771	1.01975	1.00761	1.03654	0.997072	0.98815
chr3:Pdgfc		0.711288	0.711288	0.711288	0.711288	0.711288	0.711288	0.667458	0.683237	0.634982	0.735018	0.711825	0.759304	0.828101	0.767167	0.811785	0.900652	0.812416	0.811718	0.824668	0.89623	0.879461	0.974538	1.00877	0.855726	0.85282	0.84722	0.752308	0.826727	0.941594	0.948765	0.942931	0.880596	0.803443	0.762098	0.841241	0.823895	0.876365	1.04637	1.11031	1.05322	1.0302	0.980855	1.035	1.03899	1.05954	1.10983	1.05525	1.01558
chr8:Agt		0.710302	0.710302	0.710302	0.710302	0.710302	0.710302	0.727577	0.714146	0.733425	0.71918	0.718587	0.741576	0.830837	0.743926	0.740448	0.701331	0.640468	0.599844	0.585524	0.644886	0.715688	0.835333	0.986531	0.984905	1.11759	1.12532	1.10041	1.16878	1.3184	1.4223	1.39695	1.39046	1.31658	1.19138	1.11241	1.10352	1.11097	1.13528	1.15309	1.0641	1.00914	1.04971	0.96884	0.941302	1.03898	1.15652	0.98171	0.93147
chr9:Sorl1		0.709877	0.709877	0.709877	0.709877	0.709877	0.709877	0.706054	0.680364	0.567417	0.621694	0.601411	0.538075	0.613418	0.574417	0.576068	0.596064	0.581982	0.608481	0.701282	0.801703	0.860122	0.996608	1.08564	1.12516	1.2118	1.26882	1.26997	1.34039	1.35967	1.29944	1.21589	1.1397	1.01346	0.880242	0.768012	0.704143	0.554005	0.453883	0.418494	0.309315	0.243561	0.245638	0.200695	0.222153	0.228834	0.248141	0.230507	0.29318
chr11:H2afv		0.707713	0.707713	0.707713	0.707713	0.707713	0.707713	0.576467	0.602058	0.279669	0.305831	0.361924	0.269737	0.0368307	-0.0419939	-0.0918379	-0.0671965	-0.121616	0.13853	0.17337	0.556567	0.744136	0.699725	0.649016	0.706704	0.900045	0.957735	0.900381	0.990157	0.704989	0.807376	0.753307	0.549606	0.49671	0.348452	0.275178	0.042552	-0.198239	-0.229591	-0.398626	-0.312067	-0.668364	-0.861762	-0.939603	-0.831371	-0.631848	-0.474314	-0.246263	0.0203054
chr5:Nat8l		0.707296	0.707296	0.707296	0.707296	0.707296	0.707296	0.654782	0.723632	0.790646	0.763508	0.731524	0.706615	0.705746	0.673806	0.680955	0.688265	0.715035	0.848239	0.856931	0.880961	0.90186	1.00364	1.1125	1.10007	1.15897	1.23345	1.38044	1.40685	1.33904	1.37615	1.41286	1.395	1.38469	1.3604	1.31189	1.2297	1.11262	0.920693	0.820828	0.808311	0.719272	0.667738	0.596596	0.569287	0.622387	0.670007	0.789364	0.848267
chr8:Klhl2		0.704695	0.704695	0.704695	0.704695	0.704695	0.704695	0.800698	0.815022	0.826409	0.798509	0.856416	0.995705	0.868121	0.840981	0.758803	0.763757	0.829739	0.864212	0.853493	0.749494	0.771026	0.690346	0.594517	0.544017	0.575727	0.561361	0.572858	0.599438	0.586648	0.552827	0.543498	0.571963	0.628937	0.738209	0.878169	0.934813	1.02197	1.09802	1.1339	1.05655	1.01368	1.01851	0.938846	0.898186	0.879321	0.87951	0.735886	0.731371
chr10:Atp2b1		0.704297	0.704297	0.704297	0.704297	0.704297	0.704297	0.731108	0.729222	0.756433	0.799773	0.890568	0.799493	0.864443	0.934913	0.926827	0.856511	0.838831	0.752576	0.801772	0.768576	0.729687	0.680789	0.685092	0.651296	0.59768	0.562081	0.524505	0.526774	0.543283	0.409	0.458975	0.498732	0.458665	0.424722	0.330921	0.334177	0.347453	0.426045	0.390425	0.391438	0.509901	0.44983	0.499322	0.513602	0.476765	0.539837	0.459877	0.491282
chr12:Greb1		0.703469	0.703469	0.703469	0.703469	0.703469	0.703469	0.755201	0.797095	0.799417	0.868308	0.897027	0.834129	0.817206	0.76135	0.818859	0.765372	0.759502	0.734012	0.649768	0.594885	0.510854	0.458852	0.38281	0.31844	0.372703	0.328925	0.282144	0.233446	0.176911	0.180844	0.333002	0.343982	0.308767	0.37077	0.458655	0.431433	0.473394	0.436373	0.519424	0.536142	0.546166	0.425966	0.392152	0.445003	0.460293	0.330825	0.334701	0.276241
chr11:Srsf2		0.700853	0.700853	0.700853	0.700853	0.700853	0.700853	0.76952	0.837163	0.836522	0.895547	0.940682	1.08764	1.14904	1.22573	1.21737	1.18748	1.13581	1.11005	1.04519	1.00234	0.918665	0.899995	0.774033	0.738089	0.681302	0.573519	0.643759	0.692952	0.663936	0.69698	0.80483	0.842385	0.856731	0.906126	0.895922	0.970917	1.08112	1.08204	1.18258	1.29262	1.31532	1.26245	1.19867	1.11918	1.11767	1.08459	1.00569	0.909941
chrX:Diaph2		0.700103	0.700103	0.700103	0.700103	0.700103	0.700103	0.81126	0.661234	0.773943	1.03773	1.07922	0.837683	0.987434	1.12771	1.19143	1.11313	1.00152	0.814574	0.7813	0.571261	0.221506	-0.0665321	-0.131719	-0.354622	-0.655507	-0.795931	-0.854103	-0.86288	-0.700488	-0.782554	-0.630171	-0.38291	-0.181112	0.144537	0.243511	0.448037	0.641676	0.682688	1.03163	1.04233	1.23522	1.2242	1.17589	1.23843	1.19839	1.20527	1.26068	1.34085
chrX:Nhsl2		0.698636	0.698636	0.698636	0.698636	0.698636	0.698636	0.686413	0.790474	0.98845	1.06429	0.948885	0.855894	0.921908	1.02753	1.13634	1.11275	0.905735	0.783222	0.742826	0.562097	0.503519	0.494967	0.522225	0.437159	0.305597	0.27133	0.348376	0.491828	0.605366	0.526317	0.51962	0.672416	0.890339	0.92595	0.993127	0.98344	0.995851	0.993887	0.933696	0.889616	1.02143	1.15473	0.99177	0.853289	0.76832	0.587542	0.504192	0.557531
chr8:Mfhas1		0.697013	0.697013	0.697013	0.697013	0.697013	0.697013	0.719711	0.597105	0.482668	0.633979	0.554457	0.520662	0.469032	0.341419	0.25914	0.215825	0.376341	0.343689	0.533255	0.494453	0.468089	0.518901	0.67095	0.711781	0.952939	1.1986	1.23304	1.10079	1.10321	1.02318	1.22956	1.11001	1.05829	0.848416	0.822488	0.624975	0.507659	0.586702	0.61017	0.522497	0.538114	0.446135	0.417044	0.442382	0.534495	0.503799	0.451171	0.547906
chr10:Ostm1		0.696549	0.696549	0.696549	0.696549	0.696549	0.696549	0.789788	0.903495	1.08668	1.21223	1.11429	1.14544	1.23213	1.118	1.15681	1.07302	1.13079	1.06001	0.982347	0.919924	0.91159	0.876863	0.834543	0.749029	0.818193	0.751389	0.714084	0.65853	0.61465	0.434796	0.341455	0.335214	0.377616	0.396379	0.497129	0.48012	0.659319	0.685041	0.859298	0.76674	0.977054	1.14376	1.19548	1.25037	1.22915	1.05837	1.01529	0.888647
chr14:Cmtm5		0.696222	0.696222	0.696222	0.696222	0.696222	0.696222	0.711136	0.715048	0.675647	0.631899	0.580934	0.637839	0.743675	0.759626	0.750019	0.751131	0.72644	0.798814	0.954145	1.00865	1.10745	1.29219	1.40996	1.40948	1.48117	1.5	1.5	1.5	1.5	1.5	1.47137	1.43004	1.28008	1.18082	1.12374	1.03565	1.0299	0.977762	0.964843	0.875965	0.766145	0.662143	0.638908	0.63809	0.612612	0.651862	0.660676	0.581481
chr15:Cntn1		0.695352	0.695352	0.695352	0.695352	0.695352	0.695352	0.671601	0.724045	0.754226	0.659681	0.632971	0.60196	0.602658	0.593529	0.529771	0.557594	0.589305	0.557496	0.570958	0.532114	0.617049	0.655266	0.66771	0.650137	0.68172	0.767996	0.753394	0.752401	0.855592	0.832634	0.948806	0.939807	0.958539	0.982287	0.989547	0.984661	0.929161	0.92998	0.891931	0.856923	0.887288	0.80467	0.746647	0.710935	0.65813	0.694369	0.677634	0.726544
chr1:Plekhm3		0.692449	0.692449	0.692449	0.692449	0.692449	0.692449	0.638411	0.690845	0.702298	0.813	0.821836	0.841461	0.862788	0.889613	0.791314	0.729639	0.464828	0.456783	0.343217	0.265631	0.182153	-0.0595172	-0.26881	-0.48728	-0.565931	-0.555909	-0.684187	-0.756941	-0.704301	-0.698179	-0.640991	-0.557557	-0.399318	-0.381195	-0.264383	-0.33835	-0.348713	-0.285004	-0.212948	-0.415769	-0.649235	-0.750083	-1.10518	-1.05429	-0.969997	-1.11355	-1.24006	-1.21827
chr4:Hes5	Y	0.692106	0.692106	0.692106	0.692106	0.692106	0.692106	0.667444	0.681005	0.607734	0.529998	0.488112	0.479918	0.444259	0.415489	0.385692	0.405894	0.454275	0.48729	0.529662	0.627939	0.746839	0.851715	0.999618	1.10769	1.19626	1.26291	1.28862	1.32968	1.358	1.37387	1.36794	1.3133	1.30731	1.25824	1.25602	1.23278	1.23698	1.25621	1.23454	1.19528	1.12947	1.10423	1.12433	1.11832	1.06784	1.00531	0.973967	0.970318
chr15:Slc4a8		0.691689	0.691689	0.691689	0.691689	0.691689	0.691689	0.674514	0.656017	0.66566	0.667425	0.603853	0.633402	0.642529	0.654993	0.668807	0.693282	0.721575	0.701761	0.732032	0.737324	0.759433	0.799757	0.819208	0.882224	0.912337	0.908781	0.933165	0.976445	1.03986	1.08218	1.13527	1.17904	1.23651	1.25845	1.2328	1.25429	1.30578	1.27467	1.27298	1.27958	1.27312	1.24565	1.18979	1.13654	1.12276	1.11212	1.06386	1.03609
chr3:Car14		0.687383	0.687383	0.687383	0.687383	0.687383	0.687383	0.677206	0.662685	0.68093	0.627543	0.676818	0.665172	0.595864	0.596593	0.608475	0.620475	0.670738	0.693878	0.694091	0.766483	0.892113	0.888467	0.964193	1.03332	1.11055	1.16898	1.19208	1.15316	1.15349	1.16395	1.12472	1.10228	1.07096	1.05036	1.09273	1.10917	1.083	1.07921	1.05425	1.05029	1.06142	1.01608	0.975579	0.967495	0.926921	0.859345	0.743163	0.652
chr12:Laptm4a		0.686523	0.686523	0.686523	0.686523	0.686523	0.686523	0.744775	0.680389	0.648336	0.506999	0.477818	0.513668	0.568313	0.634668	0.542937	0.561272	0.59209	0.659216	0.871875	0.941009	1.03953	1.1549	1.24824	1.35406	1.3949	1.5	1.5	1.5	1.44064	1.29233	1.34312	1.33153	1.27727	1.21146	1.08627	1.0267	0.915657	0.852829	0.797677	0.790177	0.741053	0.646835	0.566135	0.377666	0.33357	0.273827	0.18191	0.0906246
chr8:Clcn3		0.685607	0.685607	0.685607	0.685607	0.685607	0.685607	0.608685	0.624474	0.628009	0.537125	0.638091	0.621434	0.646893	0.576352	0.711443	0.729025	0.776582	0.873411	0.829975	0.929281	1.06541	1.06629	1.10561	1.12739	1.15855	1.10392	1.15905	1.09254	0.983132	1.08889	1.10461	1.01287	0.928707	0.97018	1.02768	1.03094	1.06657	1.04157	1.17725	1.1805	1.20632	1.10038	1.16675	1.18702	1.07034	1.10459	1.22767	1.08737
chr8:Saraf		0.682786	0.682786	0.682786	0.682786	0.682786	0.682786	0.62858	0.575874	0.735063	0.855842	0.614678	0.642835	0.510628	0.633413	0.694426	0.949463	0.870639	0.885991	0.986206	0.967467	1.0256	1.17131	1.3724	1.5	1.5	1.5	1.35855	1.5	1.4558	1.47557	1.44493	1.32509	1.25204	1.0453	0.88468	0.888461	0.888539	0.771902	0.658218	0.759881	0.775274	0.751927	0.710668	0.666089	0.710604	0.700092	0.60792	0.427378
chr6:Ahcyl2		0.682176	0.682176	0.682176	0.682176	0.682176	0.682176	0.907088	1.11501	1.16859	1.24239	1.09492	1.36841	1.46922	1.5	1.5	1.5	1.44183	1.17005	0.923859	0.84114	0.63687	0.573556	0.177376	0.0138723	-0.0675424	-0.220324	-0.292566	-0.384229	-0.311312	-0.280701	-0.25066	-0.234494	-0.109394	-0.0555657	-0.0984043	-0.140759	0.0540267	0.196006	0.388094	0.529924	0.522576	0.532258	0.535269	0.428832	0.607911	0.82387	0.791209	0.726766
chr8:Gm6483		0.67963	0.67963	0.67963	0.67963	0.67963	0.67963	0.624976	0.702622	0.755248	0.874398	0.929784	0.947793	1.03408	1.1511	1.27377	1.18154	1.17854	1.2017	1.1034	0.791229	0.616576	0.565458	0.479616	0.340942	0.250116	0.0424271	-0.0362793	-0.104402	-0.0677079	-0.121862	0.00136993	0.0636516	0.126605	0.0734336	0.278147	0.299028	0.372463	0.469417	0.527346	0.574723	0.669524	0.618152	0.641243	0.692695	0.798622	0.610543	0.469508	0.432228
chr6:Cadps2		0.679459	0.679459	0.679459	0.679459	0.679459	0.679459	0.833981	0.821346	0.591431	0.659816	0.474573	0.336409	0.263915	0.196885	0.22419	0.207436	0.0407244	-0.221396	-0.274483	-0.349073	-0.637916	-0.819858	-0.889843	-1.14185	-1.18217	-1.47861	-1.5	-1.5	-1.5	-1.5	-1.5	-1.5	-1.5	-1.47037	-1.46642	-1.4359	-1.27141	-1.07669	-1.03144	-0.854639	-0.747759	-0.678198	-0.598488	-0.596887	-0.550091	-0.521152	-0.565616	-0.499288
chr6:St3gal5		0.679209	0.679209	0.679209	0.679209	0.679209	0.679209	0.612528	0.766583	0.760061	0.693886	0.941273	0.791989	0.718211	0.961523	1.18882	1.06955	0.954141	0.832246	0.778359	0.70171	0.686831	0.752202	0.829939	1.06975	0.996342	1.03321	1.22608	1.36089	1.5	1.41073	1.47984	1.42807	1.44573	1.48261	1.07882	0.82758	0.675039	0.567498	0.545994	0.487932	0.391549	0.100227	0.149473	0.0328761	-0.0407566	0.0474276	0.106692	0.154071
chr3:Arhgef26		0.678937	0.678937	0.678937	0.678937	0.678937	0.678937	0.882991	1.07101	1.21642	1.3627	1.4008	1.31822	1.41956	1.3669	1.30615	1.27304	1.03787	0.818303	0.544401	0.357588	0.208179	0.187386	0.0178608	-0.120426	-0.208659	-0.164548	-0.247735	-0.303055	-0.302355	-0.320256	-0.0900283	0.128062	0.0736373	0.345302	0.367523	0.513418	0.582558	0.718576	0.88768	0.971358	1.1665	1.1858	1.11741	1.27519	1.13877	1.07662	1.0285	0.892187
chr17:Srrm2		0.677311	0.677311	0.677311	0.677311	0.677311	0.677311	0.728164	0.684001	0.834458	0.589531	0.873793	0.852947	0.898193	0.698498	0.769839	0.669601	0.333436	0.270333	0.0810437	0.0412152	-0.00641546	-0.276107	-0.526785	-0.597339	-0.627668	-0.733323	-0.828172	-0.731299	-0.740699	-0.653831	-0.570933	-0.283854	-0.102625	0.168228	0.288717	0.397222	0.5715	0.811368	0.921389	1.14646	1.42468	1.41224	1.35848	1.35783	1.33937	1.3741	1.36611	1.26009
chr3:Ank2		0.676971	0.676971	0.676971	0.676971	0.676971	0.676971	0.757546	0.744434	0.86386	0.987113	1.02799	0.921113	0.867887	0.983251	0.911625	0.776999	0.780645	0.444828	0.113807	-0.305947	-0.767497	-1.13047	-1.40083	-1.5	-1.5	-1.5	-1.5	-1.5	-1.5	-1.5	-1.5	-1.5	-1.5	-1.5	-1.30676	-0.914022	-0.695975	-0.452775	-0.264734	-0.191057	0.125128	0.296381	0.532841	0.659828	0.566443	0.603755	0.36325	0.224451
chr10:Ust		0.673796	0.673796	0.673796	0.673796	0.673796	0.673796	0.63489	0.639266	0.714506	0.727506	0.701423	0.593493	0.453131	0.421807	0.429223	0.321694	0.23897	0.14267	0.126098	0.0352982	-0.163763	-0.19783	-0.218084	-0.31766	-0.397482	-0.377522	-0.290422	-0.202614	-0.0694348	-0.0968667	0.00106431	0.227472	0.402945	0.517964	0.741953	0.946526	1.04814	1.03624	1.00772	0.957132	1.11302	0.964684	0.985598	1.05254	1.0109	0.937868	0.841582	0.768721
chr2:Lrp4		0.670936	0.670936	0.670936	0.670936	0.670936	0.670936	0.621425	0.682197	0.871659	0.899647	0.704717	0.622273	0.764799	0.645621	0.602873	0.530947	0.569039	0.571962	0.354802	0.165144	-0.117669	-0.275322	-0.369503	-0.491065	-0.493626	-0.440106	-0.504282	-0.575107	-0.538174	-0.356624	-0.254109	-0.197214	0.0188951	0.0733668	0.374145	0.496666	0.465962	0.479544	0.626589	0.646901	0.637074	0.660414	0.674962	0.607221	0.642493	0.401079	0.254085	0.112075
chr9:Rcn2		0.668743	0.668743	0.668743	0.668743	0.668743	0.668743	0.666925	0.705025	0.764526	0.769574	0.811181	0.855942	0.837945	0.867969	0.866883	0.934676	0.962328	0.992885	1.00149	1.03436	1.02907	0.99204	0.968849	0.928731	0.84813	0.783789	0.708453	0.727507	0.673446	0.635018	0.657473	0.707488	0.652365	0.639693	0.69683	0.744396	0.739374	0.837587	0.75656	0.729165	0.736581	0.698836	0.619075	0.5724	0.578493	0.517859	0.458709	0.540275
chrX:Car5b		0.666187	0.666187	0.666187	0.666187	0.666187	0.666187	0.660702	0.705256	0.73283	0.737836	0.761595	0.773163	0.637103	0.588367	0.54469	0.678177	0.698275	0.734037	0.800871	0.906665	1.00702	1.13366	1.11857	1.23063	1.20843	1.26541	1.3117	1.37364	1.42477	1.40335	1.2899	1.12915	1.03468	1.00658	0.930584	0.898913	0.833161	0.706917	0.572317	0.531459	0.500208	0.466537	0.49964	0.460689	0.475672	0.520406	0.513672	0.582649
chr3:Nbea		0.665246	0.665246	0.665246	0.665246	0.665246	0.665246	0.540641	0.707563	0.480366	0.634323	0.559465	0.483753	0.552319	0.45731	0.727238	0.352714	0.139351	0.108898	-0.26031	-0.301523	-0.390367	-0.57884	-0.761079	-0.820543	-0.796612	-1.33018	-1.23807	-1.2297	-1.04641	-0.976256	-0.944548	-0.877585	-0.568774	-0.484456	-0.274533	-0.26153	-0.025078	0.137382	0.276437	0.0642579	0.215617	0.377816	0.68214	0.879613	1.04834	0.935849	0.944828	1.15168
chr6:Mgst1		0.665102	0.665102	0.665102	0.665102	0.665102	0.665102	0.67786	0.623356	0.609516	0.642336	0.663435	0.848793	0.87432	0.996314	0.926995	0.979064	1.03989	1.09848	1.13317	1.13736	1.1476	1.24043	1.04103	1.04743	0.837972	0.692957	0.635683	0.67055	0.634141	0.596817	0.646319	0.608422	0.559333	0.620936	0.558379	0.701512	0.75792	0.777541	0.814118	0.965934	0.9923	0.968992	1.00641	0.911244	0.724779	0.744023	0.61021	0.497173
chr8:Kbtbd11		0.66016	0.66016	0.66016	0.66016	0.66016	0.66016	0.66036	0.713959	0.604689	0.622022	0.70668	0.647825	0.672926	0.621694	0.527848	0.562427	0.602285	0.641724	0.65315	0.727996	0.83381	0.859268	0.886886	0.959714	1.04639	1.09559	1.13595	1.22952	1.24712	1.24819	1.28143	1.27154	1.24183	1.26647	1.19719	1.18057	1.14987	1.16511	1.10035	1.10103	1.05777	1.03798	1.0051	1.04847	1.02503	0.979109	1.00673	1.05217
chr17:Clic1		0.658901	0.658901	0.658901	0.658901	0.658901	0.658901	0.606523	0.626445	0.62135	0.588468	0.57413	0.610544	0.52849	0.509485	0.616958	0.657616	0.841743	0.901846	0.933493	0.955764	1.05557	1.15591	1.22284	1.35059	1.46206	1.45869	1.48301	1.34451	1.30743	1.30804	1.24246	1.11135	0.976625	1.00243	1.03833	1.02243	0.918434	0.793182	0.725309	0.715732	0.654437	0.704392	0.671548	0.65147	0.469167	0.28855	0.178269	0.14244
chr3:Slc7a11		0.653716	0.653716	0.653716	0.653716	0.653716	0.653716	0.827676	0.844848	0.952125	0.962451	0.917188	0.93588	1.16109	1.09752	1.10968	1.06981	0.965431	0.816269	0.684052	0.576798	0.461345	0.367288	0.309073	0.149129	0.0222323	-0.0566292	-0.103674	-0.133755	-0.109743	-0.00269035	0.102817	0.184697	0.346579	0.539869	0.677435	0.826608	0.97312	1.06115	1.23445	1.36204	1.5	1.5	1.5	1.5	1.5	1.5	1.5	1.45318
chr2:Slc1a2		0.652027	0.652027	0.652027	0.652027	0.652027	0.652027	0.693492	0.659155	0.663367	0.69049	0.74205	0.740816	0.750215	0.722544	0.70451	0.725188	0.715111	0.692699	0.68549	0.650724	0.586194	0.567849	0.531794	0.529651	0.584387	0.559815	0.5471	0.551952	0.583014	0.59618	0.652792	0.67878	0.713622	0.766795	0.799502	0.838952	0.906083	0.85868	0.967616	0.962407	0.962413	1.03918	1.03795	1.08836	1.06313	1.06171	1.07303	1.16428
chr4:Slc2a1		0.651351	0.651351	0.651351	0.651351	0.651351	0.651351	0.631314	0.635668	0.685428	0.688159	0.703851	0.740269	0.778956	0.807952	0.734155	0.70458	0.726557	0.74546	0.730188	0.747966	0.755947	0.802213	0.813638	0.868872	0.878501	0.881196	0.941064	0.894204	0.916135	0.908537	0.931279	0.949714	0.889251	0.935729	0.948028	0.990422	1.06324	1.10813	1.05298	1.03482	1.05441	1.00391	0.990152	1.06249	1.04285	0.94235	0.85928	0.864285
chr1:Epb41l5		0.650443	0.650443	0.650443	0.650443	0.650443	0.650443	0.785897	0.880144	0.808902	0.954041	0.957895	0.863805	0.984124	1.06115	1.19297	1.05097	0.902854	0.787232	0.652478	0.662151	0.460859	0.199104	0.132014	0.136886	-0.0561415	-0.158265	-0.329762	-0.289999	-0.237495	-0.250945	-0.353386	-0.313413	-0.0169586	0.187878	0.149951	0.262528	0.400537	0.449099	0.521174	0.516273	0.53195	0.197893	0.175595	0.0773592	-0.0581472	-0.121485	-0.0699933	-0.251236
chr1:Acadl		0.650062	0.650062	0.650062	0.650062	0.650062	0.650062	0.735214	0.708544	0.598309	0.416409	0.38672	0.487009	0.583783	0.777864	0.749893	0.825468	0.901776	1.04821	1.08117	1.22939	1.39768	1.48988	1.5	1.5	1.40412	1.40783	1.35292	1.36103	1.17773	1.22521	1.07515	0.997295	0.862919	0.556942	0.531283	0.505593	0.557582	0.480047	0.245904	0.249222	0.173921	0.326674	0.442722	0.390925	0.557338	0.551152	0.606735	0.559918
chr11:Cxcl16		0.64937	0.64937	0.64937	0.64937	0.64937	0.64937	0.484825	0.481109	0.447469	0.408995	0.346336	0.3733	0.29484	0.335286	0.274982	0.236476	0.0946775	0.269653	0.332749	0.481613	0.563263	0.668893	0.657503	0.791993	0.958532	0.969479	1.03961	1.16397	1.05971	0.979481	0.906688	0.822412	0.779238	0.720052	0.61992	0.406977	0.390467	0.299069	0.184952	0.0442812	0.0406792	-0.126765	-0.237905	-0.423781	-0.438586	-0.444689	-0.48827	-0.516015
chr3:Sep15		0.646737	0.646737	0.646737	0.646737	0.646737	0.646737	0.666758	0.622605	0.478576	0.275636	0.263521	0.25662	0.321755	0.34101	0.405836	0.428733	0.613573	0.655772	0.911206	1.20961	1.37916	1.5	1.5	1.5	1.5	1.5	1.5	1.5	1.5	1.5	1.37025	1.2603	0.980704	0.720319	0.714902	0.455042	0.238076	0.107833	0.0265618	-0.137076	-0.282296	-0.233219	-0.297078	-0.359248	-0.297904	-0.403681	-0.322015	-0.246309
chr11:Luc7l3		0.643988	0.643988	0.643988	0.643988	0.643988	0.643988	0.720518	0.752572	0.765659	0.920431	0.97531	0.929889	0.771575	0.656077	0.798721	0.881189	1.16086	0.819927	0.328897	-0.182509	-0.613657	-1.0222	-1.5	-1.5	-1.5	-1.5	-1.5	-1.5	-1.5	-1.5	-1.5	-1.5	-1.5	-1.20229	-0.971054	-0.880713	-0.339118	0.0479406	0.163147	0.35809	0.74267	0.83574	1.03344	0.920116	0.890996	0.771836	0.792715	0.508253
chr13:Gpx8		0.642662	0.642662	0.642662	0.642662	0.642662	0.642662	0.515926	0.593555	0.460855	0.367358	0.363016	0.451363	0.404567	0.362896	0.360472	0.284703	0.363662	0.52763	0.477386	0.549843	0.695883	0.768767	0.907039	1.09132	1.2411	1.42099	1.5	1.5	1.5	1.5	1.4935	1.46154	1.41542	1.30777	1.10704	0.997635	0.680155	0.584028	0.406023	0.128776	0.235958	0.238408	0.156296	0.115947	0.0367842	-0.025455	-0.182094	-0.0968993
chr6:Tcaf1		0.64159	0.64159	0.64159	0.64159	0.64159	0.64159	0.433164	0.247423	0.377314	0.340328	0.27216	0.361996	0.178219	0.17906	0.417144	0.485511	0.432059	0.539141	0.759673	0.749931	0.866107	0.866988	0.895108	1.15136	1.16759	1.25723	1.46291	1.5	1.5	1.49533	1.47525	1.41664	1.5	1.5	1.48663	1.40101	1.29539	1.03622	0.96219	0.93578	0.935381	1.03493	0.949883	0.838221	0.783035	0.761093	0.910773	0.876693
chr1:Xkr4		0.641444	0.641444	0.641444	0.641444	0.641444	0.641444	0.651058	0.587756	0.548016	0.597483	0.603076	0.510012	0.484269	0.477658	0.465838	0.445621	0.479568	0.481889	0.479662	0.539582	0.524986	0.491441	0.48561	0.411247	0.418323	0.480573	0.460287	0.449164	0.439079	0.419788	0.368907	0.323185	0.280959	0.254651	0.27364	0.265973	0.22234	0.256387	0.263163	0.241359	0.241512	0.266205	0.294716	0.390014	0.439949	0.452895	0.401542	0.45324
chr9:Myo6		0.633296	0.633296	0.633296	0.633296	0.633296	0.633296	0.683661	0.731485	0.694971	0.674568	0.629515	0.596373	0.588396	0.570848	0.522396	0.605758	0.614726	0.642062	0.660181	0.730332	0.842386	0.962656	1.00683	1.04351	1.09952	1.20206	1.21435	1.26374	1.21166	1.17634	1.15696	1.10037	1.02877	0.994147	0.943284	0.861305	0.756018	0.689063	0.62145	0.607433	0.619192	0.537059	0.500036	0.526259	0.518487	0.503457	0.495363	0.472007
chrX:Tmem47		0.632919	0.632919	0.632919	0.632919	0.632919	0.632919	0.64518	0.625911	0.767816	0.902819	0.983683	1.09852	1.13032	1.30745	1.33999	1.29027	1.29409	1.25714	1.22296	1.13503	0.931884	0.824437	0.68347	0.549468	0.384098	0.26307	0.260831	0.220155	0.230939	0.24965	0.281397	0.264723	0.242698	0.389949	0.45788	0.51049	0.630895	0.697287	0.711524	0.743309	0.641057	0.635926	0.727133	0.82265	0.677644	0.641219	0.614677	0.786302
chr1:Col9a1		0.632822	0.632822	0.632822	0.632822	0.632822	0.632822	0.741209	0.790395	0.907079	1.01711	1.12458	1.21227	1.25211	1.26923	1.26813	1.22306	1.08915	0.952474	0.801119	0.636523	0.420405	0.193322	-0.0199677	-0.152108	-0.331067	-0.420297	-0.497647	-0.53508	-0.522773	-0.517622	-0.451679	-0.294865	-0.171262	0.0726085	0.206597	0.383671	0.544871	0.71315	0.838212	0.957786	1.18339	1.29524	1.38503	1.43264	1.39874	1.37855	1.31426	1.19926
chr3:Vcam1		0.632672	0.632672	0.632672	0.632672	0.632672	0.632672	0.526094	0.520262	0.453813	0.356396	0.267382	0.423843	0.175418	0.210274	0.142089	0.112576	0.272516	0.444078	0.4528	0.540206	0.686727	0.842581	0.943365	1.13531	1.2635	1.5	1.5	1.5	1.5	1.5	1.5	1.5	1.49405	1.3558	1.23288	1.00005	0.86215	0.875346	0.76153	0.729405	0.588185	0.76032	0.681439	0.637995	0.496114	0.434981	0.564322	0.564631
chr11:Meis1		0.630576	0.630576	0.630576	0.630576	0.630576	0.630576	0.647204	0.970793	0.882324	1.03601	1.10846	0.976047	0.977635	0.984866	0.776641	0.581601	0.299104	0.204174	-0.170684	-0.25875	-0.573757	-0.794641	-1.04456	-1.2427	-1.5	-1.5	-1.5	-1.48915	-1.41381	-1.17288	-0.923578	-0.831712	-0.681532	-0.383108	-0.29889	-0.189592	-0.179427	-0.126984	0.338378	0.547043	0.620719	0.634812	0.685678	0.824295	0.872351	0.9658	1.11143	1.12783
chr17:Ankrd12		0.626893	0.626893	0.626893	0.626893	0.626893	0.626893	0.712961	0.593736	0.508502	0.612688	0.198577	0.328408	0.417914	0.262983	0.389587	0.261808	0.0531763	-0.141883	-0.422193	-0.425977	-0.862786	-0.903894	-1.24167	-1.38005	-1.5	-1.5	-1.5	-1.5	-1.5	-1.5	-1.5	-1.5	-1.5	-1.22921	-1.08726	-1.00761	-0.815062	-0.956884	-0.691015	-0.498973	-0.307998	-0.187052	-0.178096	0.133943	-0.0285225	-0.168317	-0.170749	-0.357567
chr1:Xpr1		0.626803	0.626803	0.626803	0.626803	0.626803	0.626803	0.715533	0.594052	0.590405	0.516074	0.494171	0.475907	0.596614	0.717574	0.692929	0.61518	0.564448	0.488869	0.507585	0.563254	0.652004	0.598866	0.608717	0.597653	0.513191	0.547364	0.542104	0.655381	0.658439	0.578907	0.454414	0.350584	0.280536	0.244476	-0.0350455	0.0446104	-0.0761011	-0.0954593	-0.253338	-0.362448	-0.301876	-0.355526	-0.395189	-0.354711	-0.473733	-0.140409	-0.0565247	0.242052
chr6:Rassf4		0.623064	0.623064	0.623064	0.623064	0.623064	0.623064	0.77033	0.655484	0.518284	0.441232	0.231567	0.551244	0.451004	0.185189	-0.0774537	-0.348666	-0.304834	-0.531803	-0.385351	-0.466971	-0.298738	-0.0653956	-0.154975	-0.237284	-0.147931	0.0271523	0.109976	0.247163	0.475304	0.252877	0.263522	0.0413381	-0.0259482	-0.116987	0.146441	0.232902	0.251298	0.00466729	-0.24174	-0.377344	-0.329755	-0.434633	-0.13284	-0.195848	-0.207303	-0.230235	-0.137742	-0.261668
chr8:Pcm1		0.622534	0.622534	0.622534	0.622534	0.622534	0.622534	1.05222	1.39589	1.36386	1.33501	1.3714	1.5	1.5	1.5	1.5	1.5	1.5	1.07708	0.747144	0.447668	0.449118	0.41442	0.0899687	-0.281043	-0.627992	-0.848003	-0.934846	-0.668828	-0.661241	-0.688397	-0.613835	-0.63008	-0.758607	-0.740113	-0.502467	-0.32761	-0.216595	-0.107736	-0.404962	-0.227546	-0.252682	0.0610375	0.057919	0.318873	0.454961	0.619258	0.53466	0.567145
chr1:Sulf1		0.621216	0.621216	0.621216	0.621216	0.621216	0.621216	0.572935	0.486641	0.421373	0.399727	0.269685	0.225448	0.228512	0.021902	0.157306	0.267283	0.245834	0.281645	0.287635	0.450496	0.37387	0.220291	0.270659	0.248745	0.452787	0.571359	0.601719	0.692871	0.694295	0.873419	0.96762	1.41222	1.5	1.5	1.5	1.32714	1.32384	1.05757	0.946855	0.922083	0.546539	0.275047	0.103353	0.069242	-0.192975	-0.151839	-0.0707435	-0.387767
chr6:Exoc6b		0.619544	0.619544	0.619544	0.619544	0.619544	0.619544	0.600509	0.709739	0.733792	0.974666	1.1339	1.28236	1.33791	1.18322	1.34405	1.35161	1.27254	1.25035	1.12325	1.0123	0.60648	0.261382	-0.127059	-0.324009	-0.457407	-0.594966	-0.767599	-0.710974	-0.776939	-0.57921	-0.613131	-0.3106	-0.09278	0.0778235	0.205187	0.429964	0.412853	0.554978	0.682445	0.914184	0.688686	0.978214	0.768613	0.768242	0.787919	0.691669	0.790437	0.855933
chr2:Mbd5		0.617798	0.617798	0.617798	0.617798	0.617798	0.617798	0.666623	0.682079	0.809022	1.02904	0.919132	0.755301	0.729479	0.682831	0.620209	0.553665	0.524168	0.313118	0.289069	0.0252607	-0.317652	-0.301551	-0.227312	-0.426475	-0.414001	-0.572399	-0.479342	-0.430545	-0.353579	-0.339532	-0.160609	-0.115402	-0.138174	-0.0728312	0.079651	-0.00944784	0.13867	0.0853867	0.0982938	0.183066	0.2775	0.277471	0.354498	0.497808	0.384376	0.4448	0.322777	0.402095
chr1:Pbx1		0.616642	0.616642	0.616642	0.616642	0.616642	0.616642	0.501063	0.506125	0.410792	0.356221	0.543796	0.656476	0.637475	0.628488	0.74602	0.771157	0.677651	0.595155	0.46727	0.416636	0.342275	0.155929	-0.0695764	-0.298187	-0.30521	-0.546991	-0.613857	-0.561341	-0.57325	-0.538515	-0.552729	-0.369338	-0.230657	-0.222146	-0.0853895	0.0781716	0.272772	0.136863	0.0943917	0.109885	0.250029	0.150402	0.0412652	0.189748	0.347297	0.440759	0.327348	0.229269
chr9:Plscr4		0.613877	0.613877	0.613877	0.613877	0.613877	0.613877	0.562512	0.638094	0.742973	0.88989	0.818921	0.900496	1.04962	1.15392	1.19685	1.2909	1.10242	1.34987	1.25784	1.30198	1.29597	1.2472	0.983436	0.836901	0.645776	0.739085	0.829377	0.963062	0.905839	0.946591	0.842846	0.674372	0.5755	0.623427	0.640867	0.617751	0.479686	0.450651	0.381683	0.247464	0.113984	0.106708	0.310369	0.247513	0.358163	0.321676	0.225828	0.291679
chr1:Mpc2		0.612153	0.612153	0.612153	0.612153	0.612153	0.612153	0.701217	0.634603	0.457612	0.334324	0.198445	0.331655	0.162291	0.0986585	0.242988	-0.00555549	0.0827902	0.110501	0.112909	0.21302	0.177278	0.286862	0.0311143	0.0865051	0.208841	0.18568	0.1751	0.221364	0.197683	0.160012	0.111077	-0.0762554	-0.164655	-0.132245	-0.20221	-0.394823	-0.599713	-0.625888	-0.86747	-0.969776	-0.929437	-1.13411	-1.00018	-1.1183	-0.993459	-0.848419	-0.794494	-0.557575
chr4:Zcchc7		0.611401	0.611401	0.611401	0.611401	0.611401	0.611401	0.633635	0.602221	0.632426	0.7991	0.924768	1.12443	1.23542	1.4286	1.46048	1.37797	1.35366	1.31392	1.17292	0.975887	0.658297	0.457854	0.189958	0.0265493	-0.118211	-0.174365	-0.099184	-0.106093	-0.118483	-0.0843712	0.00206573	0.0748546	0.192502	0.406231	0.509052	0.475821	0.504552	0.635029	0.505203	0.5155	0.578336	0.635515	0.72908	0.630619	0.458982	0.502034	0.555252	0.650128
chr7:Parva		0.611171	0.611171	0.611171	0.611171	0.611171	0.611171	0.634529	0.572568	0.474952	0.614741	0.706977	0.877813	0.681873	0.678286	0.325159	0.158705	0.143531	0.0792603	0.102763	0.310473	0.0300177	-0.0551547	-0.351643	-0.206734	-0.247546	0.024191	0.0591307	0.0670989	0.514425	0.527672	0.456088	0.570966	0.356593	0.29616	-0.124186	-0.224103	-0.260746	-0.320732	-0.236681	-0.574983	-0.775036	-0.873372	-0.738486	-0.555159	-0.340126	0.0347845	0.208642	0.0464414
chr10:Sash1		0.607807	0.607807	0.607807	0.607807	0.607807	0.607807	0.536783	0.558925	0.737815	0.758919	0.752376	0.641592	0.582833	0.550719	0.511647	0.579336	0.58553	0.562228	0.446224	0.308654	0.295872	0.152041	0.174906	0.0353051	0.0579653	-0.0994082	-0.238963	0.0292481	0.235416	0.502096	0.6128	0.732729	0.888913	1.00239	1.26129	1.31665	1.44811	1.5	1.38976	1.40088	1.16998	1.31935	1.32567	1.23234	1.17875	1.1208	1.14385	1.00124
chr5:Erp29		0.607307	0.607307	0.607307	0.607307	0.607307	0.607307	0.578197	0.622259	0.792365	0.874806	0.903546	1.02448	1.12235	1.2155	1.14816	1.01412	1.03067	1.10548	1.16037	1.30435	1.44911	1.46712	1.34185	1.25796	1.11369	1.27567	1.39569	1.42271	1.35653	1.49437	1.27427	1.2005	1.08888	1.25425	1.41297	1.36276	1.18393	1.11483	1.03825	0.960858	0.772915	0.77163	0.62842	0.537136	0.329107	0.0254933	-0.0132777	-0.131369
chr4:Srsf10		0.606101	0.606101	0.606101	0.606101	0.606101	0.606101	0.89422	0.752839	0.753187	0.70392	0.884279	0.911765	1.1072	1.06916	1.10662	0.805301	0.959806	0.797824	0.780395	0.611275	0.514538	0.164251	0.0818362	-0.0656759	-0.256653	-0.419863	-0.253969	-0.484546	-0.70149	-0.709704	-0.57176	-0.656823	-0.500461	-0.369472	-0.479484	-0.294742	-0.139165	-0.264923	-0.213458	-0.00906518	0.202261	0.0754372	0.154694	0.283217	0.0357135	0.135066	0.132811	0.0915469
chr2:Pmepa1		0.599387	0.599387	0.599387	0.599387	0.599387	0.599387	0.603775	0.627604	0.625716	0.602144	0.616812	0.615833	0.611027	0.606086	0.622546	0.650044	0.662665	0.679701	0.693108	0.737739	0.784656	0.800066	0.833449	0.888603	0.910984	0.942712	0.98043	1.03479	1.0548	1.07976	1.09162	1.13371	1.16385	1.17247	1.13654	1.16924	1.19468	1.18176	1.17178	1.17024	1.16488	1.13567	1.09799	1.11737	1.11129	1.1614	1.15203	1.16296
chr14:Rbm26		0.599249	0.599249	0.599249	0.599249	0.599249	0.599249	0.651014	0.836633	0.801821	0.685476	0.703698	0.645648	0.738076	0.78496	0.846469	0.661901	0.547172	0.48396	0.317511	0.132407	0.151925	-0.0151803	-0.149693	-0.416455	-0.460172	-0.469662	-0.54181	-0.470463	-0.369352	-0.288262	-0.18215	-0.155694	-0.169486	-0.101054	0.00424376	-0.00347061	-0.0426277	0.143825	0.225984	0.224687	0.0970017	-0.0480366	-0.121507	-0.178382	-0.231527	-0.315463	-0.413222	-0.45452
chrX:Hdac8		0.597054	0.597054	0.597054	0.597054	0.597054	0.597054	0.331308	0.467573	0.391445	0.554273	0.823217	0.730464	0.656795	0.645026	0.477883	0.41997	0.07532	0.0413548	-0.292752	-0.452238	-0.641279	-0.93995	-1.13885	-1.35607	-1.34259	-1.29365	-1.5	-1.35819	-1.33341	-1.18051	-0.920425	-0.663571	-0.445096	-0.16708	0.0344024	0.06324	0.0734102	0.387787	0.582206	0.738128	0.745675	0.765353	0.632241	0.468814	0.536736	0.526519	0.351151	0.346406
chr9:Gm10709		0.596843	0.596843	0.596843	0.596843	0.596843	0.596843	0.557592	0.527411	0.528112	0.508774	0.496688	0.485278	0.470855	0.450955	0.46524	0.479515	0.571742	0.642731	0.750418	0.861451	0.978336	1.09513	1.20693	1.29919	1.39268	1.45356	1.5	1.5	1.49785	1.5	1.46184	1.36331	1.28126	1.18255	1.14101	1.08743	1.02651	0.95285	0.911705	0.872149	0.797747	0.751212	0.791777	0.805542	0.819509	0.848844	0.886266	0.922315
chr16:Pvrl3		0.594589	0.594589	0.594589	0.594589	0.594589	0.594589	0.498069	0.405339	0.392676	0.507344	0.480847	0.384006	0.381328	0.481724	0.452664	0.54835	0.736608	0.833234	0.780996	0.6625	0.697549	0.731132	0.826983	0.799132	0.644249	0.597544	0.451056	0.32171	0.2653	0.302409	0.345507	0.174183	0.0948108	-0.113306	-0.123807	-0.0258248	-0.0643597	-0.14212	-0.124674	-0.0518835	-0.116372	-0.0245995	-0.0479501	-0.00511858	0.0973025	0.184192	0.148027	0.248985
chr16:Hes1	Y	0.591201	0.591201	0.591201	0.591201	0.591201	0.591201	0.581848	0.583091	0.616823	0.623806	0.639338	0.662716	0.668024	0.691938	0.7003	0.76086	0.820166	0.881336	0.949125	1.01325	1.05594	1.08289	1.10726	1.13212	1.14628	1.17081	1.16857	1.18364	1.17719	1.16763	1.13249	1.11524	1.10616	1.12592	1.13033	1.10863	1.11506	1.08605	1.05056	1.00806	1.01462	0.998397	1.00494	1.00954	0.985553	0.963062	0.992442	0.980061
chr14:Fhit		0.591082	0.591082	0.591082	0.591082	0.591082	0.591082	0.74568	0.837664	0.918369	0.97412	1.06997	1.1336	1.16342	1.02094	0.937978	0.779499	0.490968	0.094319	-0.193552	-0.380728	-0.645576	-0.88683	-1.15408	-1.5	-1.5	-1.5	-1.5	-1.5	-1.5	-1.5	-1.5	-1.34506	-1.10933	-0.936481	-0.702436	-0.509179	-0.233297	-0.11224	-0.0546818	0.0777265	0.157829	0.149678	0.211988	0.247598	0.480641	0.535362	0.450096	0.407086
chrX:Dmd		0.587829	0.587829	0.587829	0.587829	0.587829	0.587829	0.65157	0.707308	0.786636	0.786481	0.841161	0.837687	0.791679	0.676349	0.700969	0.766657	0.679598	0.557026	0.439395	0.402628	0.30649	0.253924	0.165561	0.0916715	0.0842978	-0.0785207	-0.224054	-0.235455	-0.228193	-0.282572	-0.321899	-0.300761	-0.30421	-0.289939	-0.189519	-0.142081	-0.0639836	0.0417578	0.180501	0.212213	0.390487	0.520846	0.634359	0.661719	0.760509	0.695907	0.726725	0.796219
chr9:Plekho2		0.587394	0.587394	0.587394	0.587394	0.587394	0.587394	0.509412	0.544987	0.676676	0.576534	0.504327	0.532381	0.568692	0.52006	0.354142	0.388624	0.465919	0.462856	0.453799	0.469429	0.63842	0.785076	0.825595	0.900342	0.911277	1.02214	1.08262	1.08679	1.07943	1.13222	1.11619	0.937764	0.861142	0.785786	0.783421	0.734548	0.628066	0.679104	0.728314	0.791968	0.627798	0.632189	0.704002	0.664324	0.63613	0.631392	0.753885	0.911962
chr7:Ube3a		0.586434	0.586434	0.586434	0.586434	0.586434	0.586434	0.694201	0.649817	0.666766	0.582431	0.69632	0.74677	0.879465	0.800869	0.643464	0.594817	0.692845	0.468289	0.428351	0.263747	0.349156	0.366141	0.274485	0.14111	0.0873721	-0.0274321	-0.00346406	-0.304833	-0.145594	-0.150015	-0.0539993	0.0863953	0.106501	0.43097	0.444217	0.574982	0.52873	0.228711	0.26546	0.182415	0.218951	0.422075	0.208289	0.12165	-0.16963	-0.0728012	0.195845	0.420415
chr14:Nt5dc2		0.584998	0.584998	0.584998	0.584998	0.584998	0.584998	0.463539	0.422657	0.361468	0.305615	0.31922	0.32483	0.264179	0.232287	0.260461	0.389269	0.451349	0.579257	0.723918	0.915051	1.13954	1.29218	1.45566	1.5	1.5	1.5	1.5	1.5	1.5	1.5	1.5	1.5	1.4689	1.3091	1.23027	1.09968	0.935722	0.798775	0.614707	0.414884	0.409206	0.384507	0.348887	0.354166	0.363899	0.37319	0.37414	0.442184
chr1:Sbspon		0.5819	0.5819	0.5819	0.5819	0.5819	0.5819	0.563861	0.614966	0.587774	0.589153	0.574668	0.614254	0.607582	0.627941	0.675175	0.740153	0.758347	0.85422	0.904212	0.983991	1.02915	1.09232	1.13548	1.18655	1.25452	1.29294	1.32033	1.35774	1.30668	1.32458	1.29131	1.24185	1.17444	1.11481	1.04505	0.931329	0.918222	0.843376	0.768736	0.752416	0.668026	0.590014	0.509296	0.496415	0.488104	0.48115	0.488526	0.465595
chr17:Arhgef33		0.578751	0.578751	0.578751	0.578751	0.578751	0.578751	0.570897	0.523201	0.429029	0.503361	0.690808	0.646147	0.788015	0.809737	0.869201	0.868724	0.972098	0.95049	0.970572	1.02824	1.00117	0.842929	0.804119	0.53147	0.552929	0.412679	0.390413	0.296533	0.318747	0.44788	0.524575	0.558788	0.672181	0.624252	0.866574	0.895911	1.06119	1.23203	1.36525	1.33973	1.28593	1.23716	1.22298	1.26912	1.36123	1.23495	1.13633	1.12816
chr5:Hmx1		0.577299	0.577299	0.577299	0.577299	0.577299	0.577299	0.372141	0.360404	0.169711	0.176181	0.25424	0.156784	0.0672441	0.148194	0.0173162	0.152409	0.317328	0.54768	0.57715	0.931568	0.994226	1.10702	1.20055	1.26163	1.36375	1.44432	1.47516	1.47238	1.38942	1.45301	1.30856	1.32327	1.27609	1.23572	1.28286	1.24807	1.2793	1.15195	1.10422	1.21447	1.04274	0.91618	0.757525	0.652195	0.583955	0.527186	0.443318	0.240774
chr4:Sfpq		0.576732	0.576732	0.576732	0.576732	0.576732	0.576732	0.659274	0.677889	0.655665	0.769993	0.797086	0.879593	0.866364	0.813517	0.731108	0.628892	0.636964	0.473735	0.42223	0.301886	0.187531	0.0896815	-0.0422366	-0.0171487	-0.0683553	-0.143466	-0.0884662	-0.127305	-0.125543	-0.186619	-0.0252822	0.0648027	0.119473	0.144702	0.136085	0.25476	0.30776	0.351707	0.405599	0.457152	0.497925	0.463331	0.427029	0.421637	0.51441	0.547284	0.497953	0.495488
chr14:Pcdh9		0.57387	0.57387	0.57387	0.57387	0.57387	0.57387	0.606653	0.572876	0.551876	0.64043	0.757909	0.656533	0.666172	0.708849	0.573723	0.446257	0.401182	0.249129	0.0664937	-0.171409	-0.478069	-0.740534	-0.898501	-1.06558	-1.2805	-1.43984	-1.48957	-1.5	-1.5	-1.5	-1.45571	-1.34322	-1.31682	-1.17303	-1.00396	-0.956722	-0.611771	-0.389328	-0.159673	-0.152403	-0.0146596	-0.0173472	0.192656	0.311903	0.305673	0.228131	0.270984	0.0561786
chr7:RP23-299D2.2		0.573827	0.573827	0.573827	0.573827	0.573827	0.573827	0.507489	0.464281	0.427446	0.446271	0.506713	0.40807	0.411477	0.56859	0.659081	0.578662	0.639679	0.700628	0.842127	0.857878	0.860004	0.940803	1.09763	1.08584	1.12792	1.26385	1.41159	1.47219	1.44569	1.39722	1.46152	1.41146	1.35345	1.3123	1.36792	1.34458	1.19055	1.14476	1.05226	1.07726	1.07194	1.08654	1.14412	1.0796	0.989096	0.890051	0.816481	0.847466
chr10:Cnot2		0.570875	0.570875	0.570875	0.570875	0.570875	0.570875	0.778983	0.923401	0.891268	0.862179	0.672024	0.793369	0.908408	0.936039	0.942725	1.20371	1.19821	1.02012	0.811784	0.805597	0.737718	0.642005	0.405894	0.19106	-0.0615768	-0.297641	-0.56371	-0.685619	-0.565681	-0.547472	-0.639257	-0.633428	-0.520314	-0.364556	-0.123307	0.0661283	0.299268	0.351869	0.426425	0.258914	0.332049	0.505612	0.646823	0.717394	0.640707	0.580873	0.437368	0.388294
chrX:Tsix		0.569753	0.569753	0.569753	0.569753	0.569753	0.569753	0.670645	0.492318	0.5376	0.478948	0.457815	0.467958	0.423104	0.419874	0.399219	0.300595	0.185968	0.0622488	0.0683482	-0.0743147	-0.127834	-0.242362	-0.390642	-0.457645	-0.585057	-0.618106	-0.609933	-0.613161	-0.643306	-0.662458	-0.600896	-0.542581	-0.477329	-0.384701	-0.335652	-0.218868	-0.161538	-0.113396	-0.0782373	-0.0106763	0.0207061	0.0343882	0.0423193	0.0144586	0.0472001	-0.00776746	-0.0957531	-0.187784
chr10:Tmbim4		0.569328	0.569328	0.569328	0.569328	0.569328	0.569328	0.51209	0.423912	0.289514	0.205781	0.0522175	0.110349	0.0948604	0.151519	0.313877	0.234428	0.51578	0.602259	0.724987	0.997609	1.30318	1.43128	1.5	1.5	1.5	1.5	1.5	1.5	1.5	1.5	1.5	1.39037	1.25338	1.1248	1.13144	0.900787	0.891832	0.574804	0.433615	0.226903	0.208032	0.224066	0.113985	0.00741932	-0.208025	-0.337186	-0.350595	-0.585719
chr7:Dkk3		0.567985	0.567985	0.567985	0.567985	0.567985	0.567985	0.53884	0.546192	0.555258	0.520443	0.516694	0.544569	0.539988	0.561215	0.582694	0.619999	0.655777	0.709305	0.757783	0.79941	0.853717	0.903521	0.943782	1.00581	1.03482	1.07303	1.12169	1.12157	1.13071	1.09971	1.08266	1.09439	1.07327	1.04831	1.00085	0.974537	0.932962	0.893304	0.87069	0.844602	0.826668	0.81268	0.785994	0.787372	0.77983	0.800745	0.821005	0.855019
chr3:Car2		0.567003	0.567003	0.567003	0.567003	0.567003	0.567003	0.511782	0.518914	0.476314	0.432664	0.445948	0.426441	0.422958	0.431328	0.420946	0.482058	0.582957	0.678024	0.741112	0.842757	0.946151	1.0415	1.14138	1.2173	1.25841	1.31597	1.32701	1.30814	1.25384	1.20192	1.18011	1.1469	1.07112	0.958221	0.910372	0.844277	0.779474	0.712498	0.638244	0.631652	0.60262	0.55784	0.525577	0.486237	0.515388	0.522236	0.611988	0.660361
chr6:Tia1		0.563908	0.563908	0.563908	0.563908	0.563908	0.563908	0.685901	0.607791	0.664947	0.667619	0.679896	0.683198	0.759651	0.76268	0.85643	0.858563	0.78291	0.657606	0.591034	0.337051	0.241481	0.127849	-0.052629	-0.256535	-0.368321	-0.471179	-0.5745	-0.581043	-0.575478	-0.61619	-0.559121	-0.567078	-0.5276	-0.421567	-0.253554	-0.271441	-0.267664	-0.225709	-0.171797	-0.215152	-0.241423	-0.199629	-0.278547	-0.159429	-0.199163	-0.353561	-0.368488	-0.345675
chr6:Phf14		0.562275	0.562275	0.562275	0.562275	0.562275	0.562275	0.820612	0.866496	0.92241	0.87315	0.91445	0.95862	1.05075	1.04729	0.903245	0.91215	1.05087	0.805457	0.827031	0.520704	0.470862	0.136359	0.0559448	-0.099937	-0.222706	-0.1845	-0.250453	-0.448137	-0.491425	-0.652991	-0.610922	-0.685448	-0.634679	-0.697335	-0.739691	-0.895188	-0.836902	-0.839808	-0.55722	-0.540827	-0.545816	-0.350566	-0.121864	-0.00082833	0.239053	0.270783	0.372079	0.438547
[truncated: 1,771 more rows]
[truncated: 52 more columns]

## Sheet: DiffPeaks_Neurogenesis_Traject
Chr:start-end	width	Log2FC	FDR	MeanDif	Strand	PeakScore	FocusRatio/RegionSize	Annotation	Detailed Annotation	Distance to TSS	Nearest PromoterID	Entrez ID	Nearest Unigene	Nearest Refseq	Nearest Ensembl	Gene Name	Gene Alias	Gene Description	Gene Type"	,T.0_1"	T.1_2	T.2_3	T.3_4	T.4_5	T.5_6	T.6_7	T.7_8	T.8_9	T.9_10	T.10_11	T.11_12	T.12_13	T.13_14	T.14_15	T.15_16	T.16_17	T.17_18	T.18_19	T.19_20	T.20_21	T.21_22	T.22_23	T.23_24	T.24_25	T.25_26	T.26_27	T.27_28	T.28_29	T.29_30
[truncated: 16,383 more rows]
[truncated: 70 more columns]

[truncated: 1 more sheets: DiffMotifs_Neurogenesis_Traject]
